# Supplementary material for: Synthesis of allenynes via Pd-catalyzed coupling of 1,4-diyn-3-yl carbonates with boronic acids
Source: Royal Society of Chemistry journal article supplement (doi:10.1039/d3qo01648j), 2023-11-22

## Synthesis of allenynes via Pd-catalyzed coupling of 1,4-diyne-3-yl carbonates with boronic acids

Jie Wang,<sup>a</sup> Hui Qian,<sup>\*a</sup> Shengming Ma<sup>\*a,b</sup>

<sup>a</sup> Research Center for Molecular Recognition and Synthesis, Department of Chemistry, Fudan University, 220 Handan Lu, Shanghai 200433, P. R. China. E-mail: qian\_hui@fudan.edu.cn

<sup>b</sup> State Key Laboratory of Organometallic Chemistry, Shanghai Institute of Organic Chemistry, Chinese Academy of Sciences, 345 Lingling Lu, Shanghai 200032, P. R. China. E-mail: masm@sioc.ac.cn

|                                          |          |
|------------------------------------------|----------|
| General information                      | S2       |
| Experimental details and analytical data | S3-S35   |
| References                               | S36      |
| NMR spectra of compounds                 | S37-S131 |

**General Information.** NMR spectra were taken with Bruker Avance III spectrometer (400 MHz for  $^1\text{H}$  NMR, 100 MHz for  $^{13}\text{C}$  NMR, 376 MHz for  $^{19}\text{F}$  NMR) in  $\text{CDCl}_3$ . All  $^1\text{H}$  NMR experiments were measured with tetramethylsilane (0 ppm) in  $\text{CDCl}_3$  as the internal reference;  $^{13}\text{C}$  NMR experiments were measured in relative to the signal of  $\text{CDCl}_3$  (77.0 ppm);  $^{19}\text{F}$  NMR experiments were measured in relative to the signal of  $\text{CFCl}_3$  (0 ppm) in  $\text{CDCl}_3$ . All reactions were carried out in Schlenk tubes.  $n\text{-BuLi}$  (2.5 M in hexane) was purchased from Infinity Scientific;  $\text{ClCO}_2\text{Me}$  was purchased from Sinopharm Chemical Reagent Co., Ltd.;  $\text{Pd}_2(\text{dba})_3\cdot\text{CHCl}_3$  was purchased from Strem Chemicals Inc.;  $\text{Pd}(\text{dba})_2$  was purchased from J&K; S-Phos was purchased from Bide Pharmatech Ltd.; Petroleum ether (b.p. 60-90°C), ethyl acetate, and dichloromethane were purchased from Shanghai Titan Scientific Co., Ltd. THF and Dioxane were dried over sodium wire with benzophenone as the indicator and distilled freshly before use. All the temperatures are referred to the oil baths used. Recoveries of substrates were determined by  $^1\text{H}$  NMR analysis using dibromomethane as the internal standard. 300-400 mesh silica gel purchased from Shanghai Heqi Glassware Co., Ltd. was used for column chromatography. The crude allenyne product was dissolved in petroleum ether and loaded to the silica gel column for the column chromatography purification. Due to the allenyne products are not very stable, the temperature of water bath should lower than 30 °C during concentration and the whole work-up process should be as quick as possible.

## Experimental details and analytical data

### Synthesis of starting materials

#### (1) Preparation of trideca-5,8-diyn-7-yl methyl carbonate (**1a**, wj-2-021, wj-3-103)

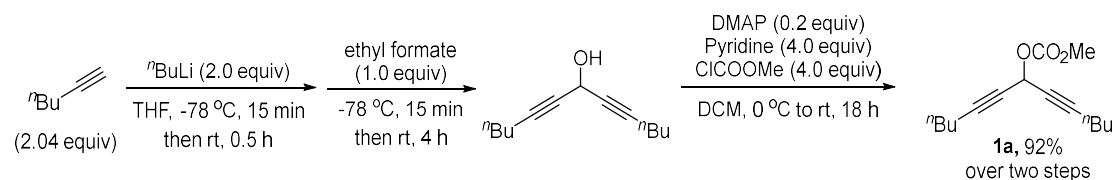

**Typical Procedure I:**<sup>1</sup> To a stirred solution of 1-hexyne (11.6 mL,  $d = 0.72\text{ g/mL}$ , 8.352 g, 102.0 mmol) in THF (60 mL) was added  $n\text{BuLi}$  (40.0 mL, 100.0 mmol, 2.5 M in hexane) dropwise over 15 min at  $-78\text{ }^\circ\text{C}$  under Ar atmosphere. The resulting mixture was stirred for 30 min at room temperature and cooled to  $-78\text{ }^\circ\text{C}$ . A solution of ethyl formate (4.0 mL,  $d = 0.921\text{ g/mL}$ , 3.684 g, 50.0 mmol) in THF (50 mL) was added dropwise over 15 min, and the resulting mixture was stirred at room temperature for 4 h as monitored by TLC. The reaction was quenched with water (30 mL) and extracted with ethyl acetate (30 mL x 3). The combined organic phase was washed with brine, dried over anhydrous  $\text{Na}_2\text{SO}_4$ , filtered, and concentrated. The crude alcohol product was directly used for next step without further purification.

**Typical Procedure II:**<sup>2</sup> To a stirred solution of DMAP (1.2224 g, 10.0 mmol) and the crude alcohol prepared above in DCM (100 mL) were added pyridine (16.1 mL,  $d = 0.983\text{ g/mL}$ , 15.8263 g, 200.0 mmol) and methyl chloroformate (15.5 mL,  $d = 1.22\text{ g/mL}$ , 18.91 g, 200.0 mmol) sequentially at  $0\text{ }^\circ\text{C}$  via an ice-water bath under Ar atmosphere. The resulting mixture was warmed up to room temperature, stirred at room temperature for 18 h as monitored by TLC, diluted with DCM (40 mL), washed sequentially with 1 M HCl (aq.) (50 mL x 3), and extracted with DCM (40 mL x 3). The combined organic phase was washed with brine, dried over anhydrous  $\text{Na}_2\text{SO}_4$ , filtered, and concentrated. The resulting residue was purified by column chromatography on silica gel to afford **1a** (11.4324 g, 92% over two steps) [eluent: petroleum ether / ethyl acetate = 40:1 (410 mL) to 30:1 (1230 mL)]; oil;  $^1\text{H NMR}$  (400 MHz,  $\text{CDCl}_3$ ):  $\delta = 5.92\text{-}5.87$  (m, 1 H, CH), 3.82 (s, 3 H,  $\text{CH}_3$ ), 2.24 (t,  $J = 6.8\text{ Hz}$ , 4 H,

2 x CH<sub>2</sub>), 1.59-1.47 (m, 4 H, CH<sub>2</sub>), 1.47-1.31 (m, 4 H, CH<sub>2</sub>), 0.91 (t, *J* = 7.2 Hz, 6 H, CH<sub>3</sub>); <sup>13</sup>C NMR (100 MHz, CDCl<sub>3</sub>): δ = 154.5, 86.9, 74.1, 57.9, 55.0, 30.1, 21.8, 18.4, 13.5; IR (neat): ν = 2958, 2934, 2265, 2239, 1751, 1441, 1320, 1309, 1247, 1170, 1123, 1045 cm<sup>-1</sup>; MS (70 eV, EI) *m/z*: 250 (M<sup>+</sup>, 13.35), 91 (100); HRMS (EI) calcd for C<sub>15</sub>H<sub>22</sub>O<sub>3</sub> [M<sup>+</sup>]: 250.1563, found: 250.1566.

## (2) Synthesis of hepta-2,5-diyn-4-yl methyl carbonate (**1b**, wj-3-104)

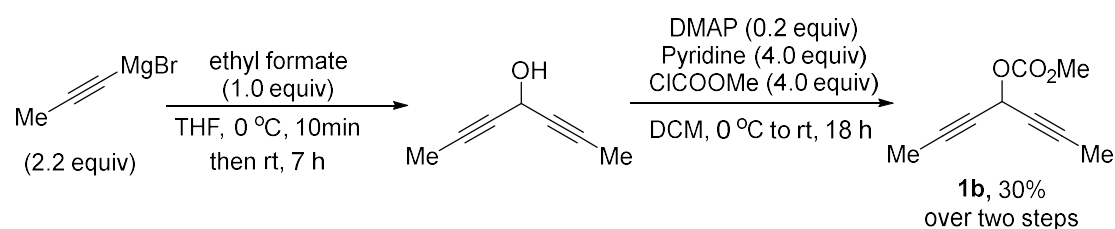

**Step 1:** To a stirred solution of ethyl formate (0.8 mL, *d* = 0.921 g/mL, 0.7368 g, 10.0 mmol) in THF (20 mL) was dropwise added 1-propynylmagnesium bromide (44 mL, 22.0 mmol, 0.5 M solution in THF) over 10 min at 0 °C via an ice-water bath under Ar atmosphere. The resulting mixture was warmed up to room temperature, stirred at room temperature for 7 h as monitored by TLC, quenched with water (220 mL), and extracted with ethyl acetate (30 mL x 3). The combined organic phase was washed with brine, dried over anhydrous Na<sub>2</sub>SO<sub>4</sub>, filtered, and concentrated. The crude alcohol product was directly used for next step without further purification.

**Step 2:** Following **Typical Procedure II**, the reaction of the crude alcohol prepared above, DMAP (0.2443 mg, 2.0 mmol), pyridine (3.2 mL, *d* = 0.983 g/mL, 3.1456 g, 40.0 mmol), and ClCO<sub>2</sub>Me (3.1 mL, *d* = 1.22 g/mL, 3.782 g, 40.0 mmol) in DCM (30 mL) afforded **1b** (0.4980 g, 30% over two steps) [eluent: petroleum ether / ethyl acetate = 15:1 (480 mL)]; oil; <sup>1</sup>H NMR (400 MHz, CDCl<sub>3</sub>): δ = 5.90-5.82 (m, 1 H, CH), 3.82 (s, 3 H, CH<sub>3</sub>), 1.89 (s, 6 H, 2 x CH<sub>3</sub>); <sup>13</sup>C NMR (100 MHz, CDCl<sub>3</sub>): δ = 154.5, 82.7, 73.2, 57.8, 55.1, 3.6; IR (neat): ν = 2962, 2239, 1752, 1441, 1315, 1249, 1172, 1119 cm<sup>-1</sup>; MS (70 eV, EI) *m/z*: 151 ((M-Me)<sup>+</sup>, 36.46), 91 (100); HRMS (EI) calcd for C<sub>8</sub>H<sub>7</sub>O<sub>3</sub> [(M-Me)<sup>+</sup>]: 151.0390, found: 151.0390.



### (3) Synthesis of hepta-2,5-diyn-4-yl methyl carbonate (**1c**, wj-3-081)

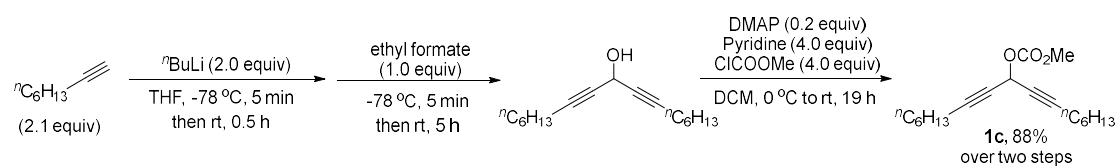

Following **Typical Procedure I**, the reaction of 1-octyne (3.1 mL,  $d = 0.747\text{ g/mL}$ , 2.3157 g, 21.0 mmol), THF (20 mL),  $n\text{BuLi}$  (8 mL, 20.0 mmol, 2.5 M in hexane), and ethyl formate (0.8 mL,  $d = 0.921\text{ g/mL}$ , 0.7368 g, 10.0 mmol) in THF (10 mL) afforded the crude alcohol; Then following **Typical Procedure II**, the reaction of the crude alcohol prepared above, DMAP (0.2447 g, 2.0 mmol), pyridine (3.2 mL,  $d = 0.983\text{ g/mL}$ , 3.1456 g, 40.0 mmol), and ClCO<sub>2</sub>Me (3.1 mL,  $d = 1.22\text{ g/mL}$ , 3.782 g, 40.0 mmol) in DCM (30 mL) afforded **1c** (2.6945 g, 88% over two steps) [eluent: petroleum ether / ethyl acetate = 50:1 (510 mL) to 40:1 (410 mL)]; oil; <sup>1</sup>H NMR (400 MHz, CDCl<sub>3</sub>):  $\delta = 5.95\text{--}5.87$  (m, 1 H, CH), 3.81 (s, 3 H, CH<sub>3</sub>), 2.23 (t,  $J = 7.0\text{ Hz}$ , 4 H, 2 x CH<sub>2</sub>), 1.52 (quint,  $J = 7.3\text{ Hz}$ , 4 H, 2 x CH<sub>2</sub>), 1.43–1.20 (m, 12 H, 6 x CH<sub>2</sub>), 0.89 (t,  $J = 6.8\text{ Hz}$ , 6 H, 2 x CH<sub>3</sub>); <sup>13</sup>C NMR (100 MHz, CDCl<sub>3</sub>):  $\delta = 154.5, 87.0, 74.1, 58.0, 55.0, 31.2, 28.4, 28.1, 22.5, 18.7, 14.0\text{ cm}^{-1}$ ; IR (neat):  $\nu = 2932, 2858, 2237, 1752, 1441, 1320, 1250, 1169, 1124\text{ cm}^{-1}$ ; MS (70 eV, EI)  $m/z$ : 306 ( $M^+$ , 3.17), 91(100); HRMS (EI) calcd for C<sub>19</sub>H<sub>30</sub>O<sub>3</sub> [ $M^+$ ]: 306.2189, found: 306.2186.

### (4) Synthesis of 1,5-dicyclopropylpenta-1,4-diyn-3-yl methyl carbonate (**1d**, wj-3-082)

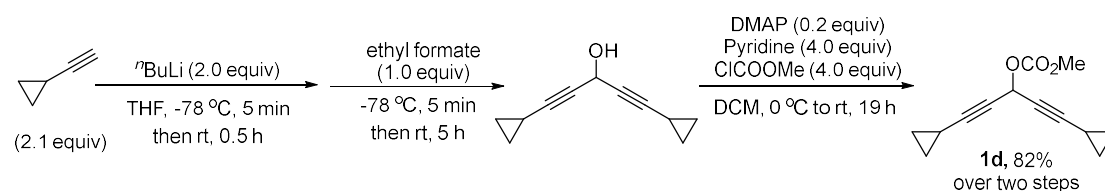

Following **Typical Procedure I**, the reaction of cyclopropylacetylene (1.8 mL,  $d = 0.78\text{ g/mL}$ , 1.404 g, 21.0 mmol), THF (20 mL),  $n\text{BuLi}$  (8 mL, 20.0 mmol, 2.5 M in hexane), and ethyl formate (0.8 mL,  $d = 0.921\text{ g/mL}$ , 0.7368 g, 10.0 mmol) in THF (10 mL) afforded the crude alcohol; Then following **Typical Procedure II**, the reaction of

the crude alcohol prepared above, DMAP (0.2450 mg, 2.0 mmol), pyridine (3.2 mL, d = 0.983 g/mL, 3.1456 g, 40.0 mmol), and ClCO<sub>2</sub>Me (3.1 mL, d = 1.22 g/mL, 3.782 g, 40.0 mmol) in DCM (30 mL) afforded **1d** (1.7747 g, 82% over two steps) [eluent: petroleum ether / ethyl acetate = 40:1 (410 mL) to 20:1 (420 mL)]; oil; <sup>1</sup>H NMR (400 MHz, CDCl<sub>3</sub>): δ = 5.89-5.82 (m, 1 H, CH), 3.81 (s, 3 H, CH<sub>3</sub>), 1.37-1.21 (m, 2 H, 2 x CH), 0.88-0.67 (m, 8 H, 4 x CH<sub>2</sub>); <sup>13</sup>C NMR (100 MHz, CDCl<sub>3</sub>): δ = 154.4, 89.9, 69.2, 58.0, 55.0, 8.2, -0.6 cm<sup>-1</sup>; IR (neat): ν = 3013, 2251, 1748, 1441, 1363, 1306, 1248, 1153, 1027 cm<sup>-1</sup>; MS (ESI) *m/z*: 241 (M+Na<sup>+</sup>); HRMS (ESI) calcd for C<sub>13</sub>H<sub>14</sub>O<sub>3</sub>Na [M+Na<sup>+</sup>]: 241.0835, found: 241.0834.

**(5) Synthesis of 1,11-dichloroundeca-4,7-diyn-6-yl methyl carbonate (1e, wj-3-073, wj-3-154)**

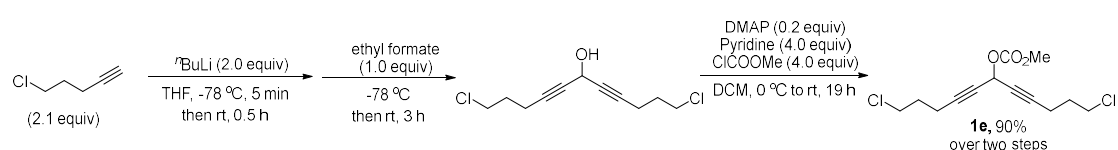

Following **Typical Procedure I**, the reaction of 5-chloro-1-pentyne (2.3 mL, d = 0.968 g/mL, 96%, 2.1373 g, 21.0 mmol), THF (20 mL), <sup>n</sup>BuLi (8 mL, 20.0 mmol, 2.5 M in hexane), and ethyl formate (0.8 mL, d = 0.921 g/mL, 0.7368 g, 10.0 mmol) in THF (10 mL) afforded the crude alcohol; Then following **Typical Procedure II**, the reaction of the crude alcohol prepared above, DMAP (0.2445 mg, 2.0 mmol), pyridine (3.2 mL, d = 0.983 g/mL, 3.1456 g, 40.0 mmol), and ClCO<sub>2</sub>Me (3.1 mL, d = 1.22 g/mL, 3.782 g, 40.0 mmol) in DCM (30 mL) afforded **1e** (2.6096 g, 90% over two steps) [eluent: petroleum ether / ethyl acetate = 30:1 (450 mL) to 10:1 (600 mL)]; oil; <sup>1</sup>H NMR (400 MHz, CDCl<sub>3</sub>): δ = 5.94-5.84 (m, 1 H, CH), 3.83 (s, 3 H, CH<sub>3</sub>), 3.63 (t, *J* = 6.4 Hz, 4 H, 2 x CH<sub>2</sub>), 2.52-2.38 (m, 4 H, 2 x CH<sub>2</sub>), 1.99 (quint, *J* = 6.5 Hz, 4 H, 2 x CH<sub>2</sub>); <sup>13</sup>C NMR (100 MHz, CDCl<sub>3</sub>): δ = 154.4, 85.1, 75.0, 57.6, 55.2, 43.4, 30.8, 16.2; IR (neat): ν = 2959, 2236, 1750, 1441, 1310, 1247, 1170, 1118 cm<sup>-1</sup>; MS (70 eV, EI) *m/z* (%): 235 ([M(<sup>37</sup>Cl<sub>2</sub>)-CO<sub>2</sub>Me]<sup>+</sup>, 4.17), 233 ([M(<sup>37</sup>Cl<sup>35</sup>Cl)-CO<sub>2</sub>Me]<sup>+</sup>, 17.63), 231 ([M(<sup>35</sup>Cl<sub>2</sub>)-CO<sub>2</sub>Me]<sup>+</sup>, 23.59), 115 (100); HRMS (EI) calcd for C<sub>11</sub>H<sub>13</sub><sup>35</sup>Cl<sub>2</sub>O [(M-

CO<sub>2</sub>Me<sup>+</sup>]: 231.0338, found: 231.0335.

### (6) Synthesis of 1,11-dicyanoundeca-4,7-diyn-6-yl methyl carbonate (**1f**, wj-3-094)

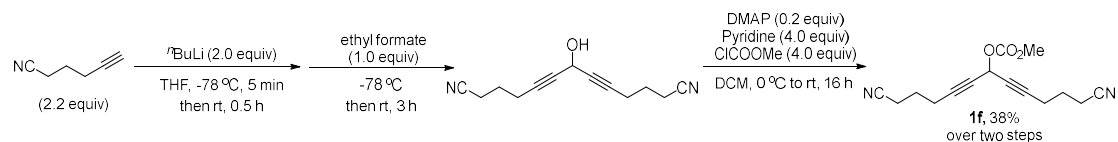

Following **Typical Procedure I**, the reaction of hex-5-ynenitrile (1.2 mL, d = 0.889 g/mL, 1.0668 g, 11.0 mmol), THF (10 mL), <sup>t</sup>BuLi (4 mL, 10.0 mmol, 2.5 M in hexane), and ethyl formate (0.4 mL, d = 0.921 g/mL, 0.3684 g, 5.0 mmol) in THF (5 mL) afforded the crude alcohol; Then following **Typical Procedure II**, the reaction of the crude alcohol prepared above, DMAP (0.1220 mg, 1.0 mmol), pyridine (1.6 mL, d = 0.983 g/mL, 1.5728 g, 20.0 mmol), and ClCO<sub>2</sub>Me (1.5 mL, d = 1.22 g/mL, 1.83 g, 19.4 mmol) in DCM (15 mL) afforded **1f** (0.5204 g, 38% over two steps) [eluent: petroleum ether / ethyl acetate = 2:1 (500 mL) to 1:1 (600 mL)]; oil; <sup>1</sup>H NMR (400 MHz, CDCl<sub>3</sub>): δ = 5.92-5.84 (m, 1 H, CH), 3.84 (s, 3 H, CH<sub>3</sub>), 2.56-2.35 (m, 8 H, 4 x CH<sub>2</sub>), 1.90 (quint, J = 7.0 Hz, 4 H, 2 x CH<sub>2</sub>); <sup>13</sup>C NMR (100 MHz, CDCl<sub>3</sub>): δ = 154.2, 118.8, 84.1, 75.7, 57.2, 55.3, 24.0, 17.7, 16.1; IR (neat): ν = 2959, 2246, 1751, 1441, 1312, 1250, 1167, 1120 cm<sup>-1</sup>; MS (ESI) m/z: 295 (M+Na<sup>+</sup>); HRMS (ESI) calcd for C<sub>15</sub>H<sub>16</sub>O<sub>3</sub>N<sub>2</sub>Na [M+Na<sup>+</sup>]: 295.1053, found: 295.1048.

### (7) Synthesis of 1,9-di((tert-butyldimethylsilyloxy)nona-3,6-diyn-5-yl methyl carbonate (**1g**, wj-3-080)

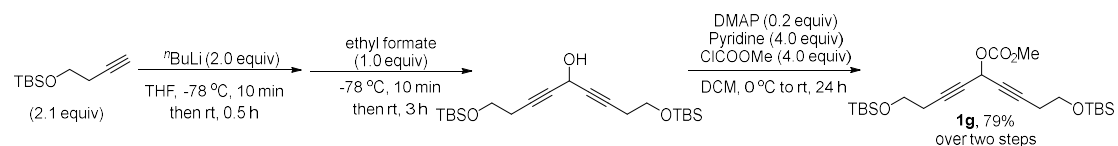

Following **Typical Procedure I**, the reaction of 4-tert-butyldimethylsilyloxybut-1-yne (3.8742 g, 21.0 mmol), THF (20 mL), <sup>t</sup>BuLi (8 mL, 20.0 mmol, 2.5 M in hexane), and ethyl formate (0.8 mL, d = 0.921 g/mL, 0.7368 g, 10.0 mmol) in THF (10 mL) afforded the crude alcohol; Then following **Typical Procedure II**, the reaction of the

crude alcohol prepared above, DMAP (0.2450 mg, 2.0 mmol), pyridine (3.2 mL, d = 0.983 g/mL, 3.1456 g, 40.0 mmol), and ClCO<sub>2</sub>Me (3.1 mL, d = 1.22 g/mL, 3.782 g, 40.0 mmol) in DCM (30 mL) afforded **1g** (3.5589 g, 79% over two steps) [eluent: petroleum ether / ethyl acetate = 40:1 (410 mL) to 30/1 (450 mL)]; oil; <sup>1</sup>H NMR (400 MHz, CDCl<sub>3</sub>): δ = 5.94-5.88 (m, 1 H, CH), 3.81 (s, 3 H, CH<sub>3</sub>), 3.73 (t, *J* = 7.0 Hz, 4 H, 2 x CH<sub>2</sub>), 2.45 (t, *J* = 7.0 Hz, 4 H, 2 x CH<sub>2</sub>), 0.89 (s, 18 H, 6 x CH<sub>3</sub>), 0.07 (s, 12 H, 4 x CH<sub>3</sub>); <sup>13</sup>C NMR (100 MHz, CDCl<sub>3</sub>): δ = 154.4, 84.0, 74.9, 61.3, 57.6, 55.1, 25.8, 23.1, 18.3, -5.4; IR (neat): ν = 2953, 2929, 2856, 2240, 1754, 1472, 1442, 1320, 1250, 1104, 1057 cm<sup>-1</sup>; MS (ESI) *m/z*: 477 (M+Na<sup>+</sup>); HRMS (ESI) calcd for C<sub>23</sub>H<sub>42</sub>O<sub>5</sub>NaSi<sub>2</sub> [M+Na<sup>+</sup>]: 477.2463, found: 477.2462.

### (8) Synthesis of 1,5-diphenylpenta-1,4-diyne-3-yl methyl carbonate (**1h**, wj-3-041)

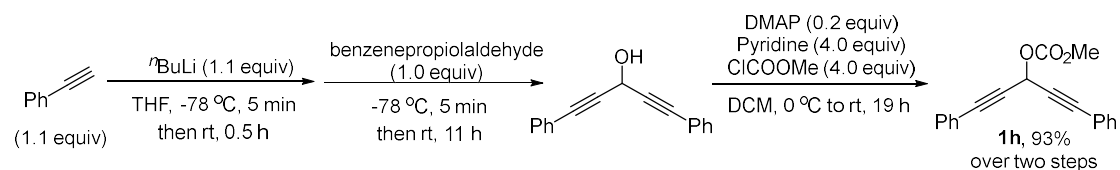

**Typical Procedure III:** To a stirred solution of phenylacetylene (2.5 mL, d = 0.93 g/mL, 2.325 g, 96% purity, 22.0 mmol) in THF (20 mL) was added <sup>n</sup>BuLi (8.8 mL, 22.0 mmol, 2.5 M in hexane) dropwise over 5 min at -78 °C under Ar atmosphere. The resulting mixture was stirred for 30 min at room temperature. Then the solution was cooled to -78 °C and 3-phenylpropionaldehyde (2.4 mL, d = 1.064 g/mL, 2.5536 g, 19.6 mmol) was dropwise added over 5 min. The resulting mixture was stirred at room temperature for 11 h as monitored by TLC, quenched with water (10 mL), and extracted with ethyl acetate (10 mL x 3). The combined organic phase was washed with brine, dried over anhydrous Na<sub>2</sub>SO<sub>4</sub>, filtered, and concentrated. The crude alcohol product was directly used for next step without further purification.

**Step 2:** Following **Typical Procedure II**, the reaction of the crude alcohol prepared above, DMAP (0.4889 g, 4.0 mmol), pyridine (6.4 mL, d = 0.983 g/mL, 6.2912 g, 79.5 mmol), and ClCO<sub>2</sub>Me (6.2 mL, d = 1.22 g/mL, 7.564 g, 80.0 mmol) in DCM (60 mL)

afforded **1h** (5.3896 g, 93% over two steps) [eluent: petroleum ether / ethyl acetate = 20:1 (2000 mL)]; oil; **<sup>1</sup>H NMR** (400 MHz, CDCl<sub>3</sub>): δ = 7.51 (d, *J* = 7.2 Hz, 4 H, Ar-H), 7.40-7.27 (m, 6 H, Ar-H), 6.41 (s, 1 H, CH), 3.87 (s, 3 H, CH<sub>3</sub>); **<sup>13</sup>C NMR** (100 MHz, CDCl<sub>3</sub>): δ = 154.4, 132.1, 129.2, 128.3, 121.5, 86.1, 82.1, 58.2, 55.4; **IR** (neat): ν = 2239, 1751, 1490, 1441, 1318, 1242, 1095, 1045 cm<sup>-1</sup>; **MS** (70 eV, EI) *m/z* (%): 290 (M<sup>+</sup>, 22.1), 215 (100); **HRMS** calcd for C<sub>19</sub>H<sub>14</sub>O<sub>3</sub> [M<sup>+</sup>]: 290.0937, found: 290.0937.

**(9) Preparation of 1-phenylnona-1,4-diyn-3-yl methyl carbonate (1i, wj-2-062, wj-3-166)**

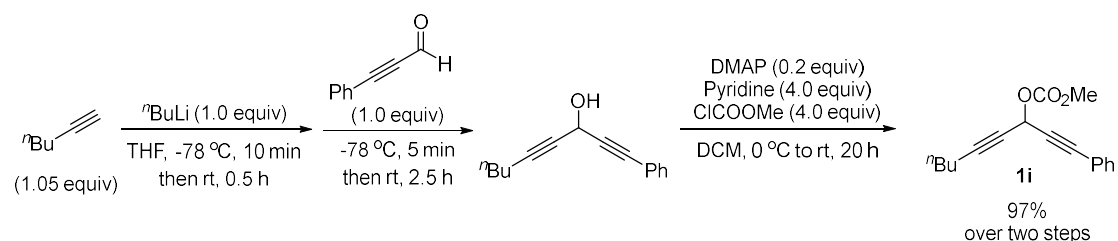

Following **Typical Procedure III**, the reaction of 1-hexyne (2.4 mL, d = 0.715 g/mL, 1.7160 g, 20.9 mmol), THF (20 mL), *n*-BuLi (8 mL, 20.0 mmol, 2.5 M in hexane), and benzenepropionaldehyde (2.45 mL, d = 1.064 g/mL, 2.6068 g, 20.0 mmol) afforded the crude alcohol; Then following **Typical Procedure II**, the reaction of the crude alcohol prepared above, DMAP (0.4885 g, 4.0 mmol), pyridine (6.4 mL, d = 0.983 g/mL, 6.2912 g, 80.0 mmol), and ClCO<sub>2</sub>Me (6.2 mL, d = 1.22 g/mL, 7.5640 g, 80.0 mmol) in DCM (50 mL) afforded **1i** (5.2405 g, 97% over two steps)[eluent: petroleum ether / ethyl acetate = 30:1 (310 mL) to 20:1 (420 ml)]; oil; **<sup>1</sup>H NMR** (400 MHz, CDCl<sub>3</sub>): δ = 7.53-7.42 (m, 2 H, Ar-H), 7.38-7.27 (m, 3 H, Ar-H), 6.19-6.10 (m, 1 H, CH), 3.84 (s, 3 H, CH<sub>3</sub>), 2.27 (t, *J* = 7.0 Hz, 2 H, CH<sub>2</sub>), 1.58-1.48 (m, 2 H, CH<sub>2</sub>), 1.48-1.35 (m, 2 H, CH<sub>2</sub>), 0.91 (t, *J* = 7.2 Hz, 3 H, CH<sub>3</sub>); **<sup>13</sup>C NMR** (100 MHz, CDCl<sub>3</sub>): δ = 154.6, 132.0, 129.0, 128.2, 121.7, 87.8, 85.4, 82.8, 73.6, 58.0, 55.1, 30.1, 21.9, 18.4, 13.5; **IR** (neat): ν = 2958, 2934, 2872, 2237, 1751, 1491, 1441, 1319, 1245, 1149, 1096, 1008 cm<sup>-1</sup>; **MS** (70 eV, EI) *m/z* (%): 271 (M<sup>+</sup>+1, 8.29), 270 (M<sup>+</sup>, 45.15), 152 (100); **HRMS** (EI) calcd for C<sub>17</sub>H<sub>18</sub>O<sub>3</sub> [M<sup>+</sup>]: 270.1250, found: 270.1251.

## Synthesis of conjugated allenynes with S-phos

### (1) Synthesis of 9-(3-methoxyphenyl)trideca-7,8-dien-5-yne (**3aa**, wj-2-063, wj-3-015)

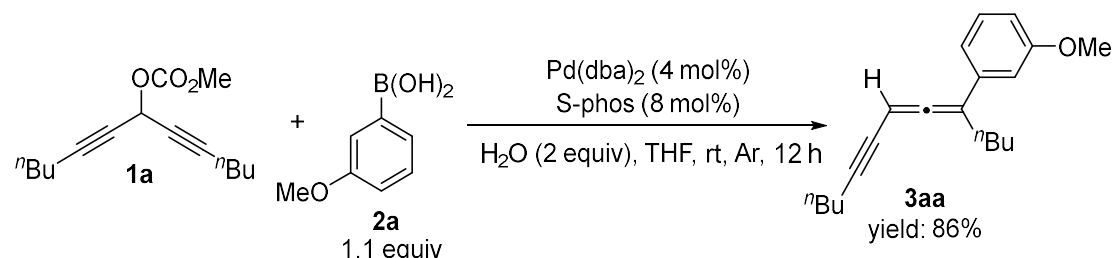

**Typical Procedure IV:** To a Schlenk tube were added 3-methoxyphenylboronic acid **2a** (167.1 mg, 1.1 mmol), Pd(dba)<sub>2</sub> (23.0 mg, 0.04 mmol), and S-phos (32.7 mg, 0.08 mmol). After adding all of solid chemicals, the flask was degassed and refilled with Ar for three times. Then methyl carbonate **1a** (250.3 mg, 1.0 mmol)/THF (5 mL) and H<sub>2</sub>O (2.0 mmol, 36  $\mu$ L) were added sequentially. After that, the resulting mixture was stirred at room temperature for 12 h as monitored by TLC, diluted with ethyl acetate (5 mL), filtrated through a short column of silica gel (3 cm) eluted with ethyl acetate (20 mL), and evaporated. The resulting residue was purified by chromatography on silica gel to afford the product **3aa** (242.5 mg, 86%) [eluent: petroleum ether / dichloromethane = 5:1 (300 mL)]; oil; <sup>1</sup>H NMR (400 MHz, CDCl<sub>3</sub>):  $\delta$  = 7.24 (t,  $J$  = 6.8 Hz, 1 H, Ar-H), 6.99 (d,  $J$  = 8.0 Hz, 1 H, Ar-H), 6.94 (s, 1 H, Ar-H), 6.78 (dd,  $J_1$  = 8.2 Hz,  $J_2$  = 1.8 Hz, 1 H, Ar-H), 5.74-5.68 (m, 1 H, CH), 3.81 (s, 3 H, CH<sub>3</sub>), 2.52-2.37 (m, 2 H, CH<sub>2</sub>), 2.30 (td,  $J_1$  = 7.0 Hz,  $J_2$  = 1.6 Hz, 2 H, CH<sub>2</sub>), 1.59-1.48 (m, 4 H, 2 x CH<sub>2</sub>), 1.48-1.36 (m, 4 H, 2 x CH<sub>2</sub>), 0.98-0.85 (m, 6 H, 2 x CH<sub>3</sub>); <sup>13</sup>C NMR (100 MHz, CDCl<sub>3</sub>):  $\delta$  = 213.1, 159.7, 137.2, 129.3, 118.9, 112.35, 112.32, 107.6, 91.1, 79.0, 72.8, 55.2, 30.8, 29.8, 29.7, 22.4, 22.0, 19.3, 13.9, 13.6; IR (neat):  $\nu$  = 2956, 2930, 2861, 2216, 1935, 1600, 1581, 1487, 1463, 1431, 1380, 1322, 1287, 1268, 1226, 1198, 1166, 1104 cm<sup>-1</sup>; MS (70 eV, EI)  $m/z$ : 282 (M<sup>+</sup>, 26.07), 197 (100); HRMS (EI) calcd for C<sub>20</sub>H<sub>26</sub>O [M<sup>+</sup>]: 282.1978, found: 282.1980.

## (2) Synthesis of 9-phenyltrideca-7,8-dien-5-yne (3ab, wj-3-044)

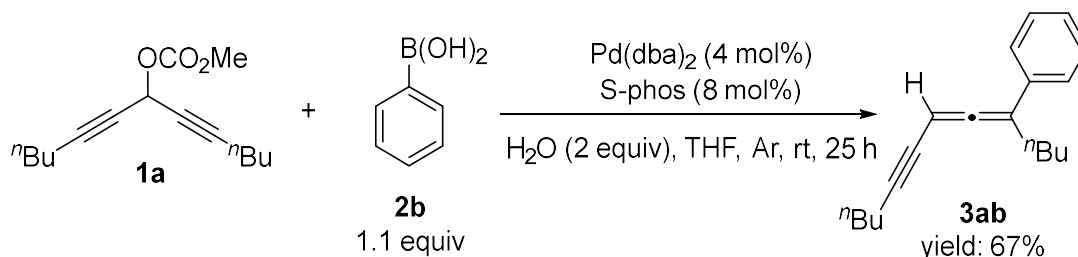

Following **Typical Procedure IV**, the reaction of phenylboronic acid **2b** (134.0 mg, 1.1 mmol), Pd(dba)<sub>2</sub> (23.1 mg, 0.04 mmol), S-phos (32.7 mg, 0.08 mmol), methyl carbonate **1a** (250.2 mg, 1.0 mmol)/THF (5 mL), and H<sub>2</sub>O (2.0 mmol, 36  $\mu$ L) afforded the product **3ab** (170.1 mg, 67%) [eluent: petroleum ether (600 mL)]; oil; <sup>1</sup>H NMR (400 MHz, CDCl<sub>3</sub>):  $\delta$  = 7.39 (d,  $J$  = 7.6 Hz, 2 H, Ar-H), 7.32 (t,  $J$  = 7.6 Hz, 2 H, Ar-H), 7.22 (t,  $J$  = 7.4 Hz, 1 H, Ar-H), 5.75-5.68 (m, 1 H, CH), 2.54-2.38 (m, 2 H, CH<sub>2</sub>), 2.31 (td,  $J_1$  = 6.9 Hz,  $J_2$  = 1.2 Hz, 2 H, CH<sub>2</sub>), 1.61-1.47 (m, 4 H, 2 x CH<sub>2</sub>), 1.47-1.34 (m, 4 H, 2 x CH<sub>2</sub>), 0.99-0.85 (m, 6 H, 2 x CH<sub>3</sub>); <sup>13</sup>C NMR (100 MHz, CDCl<sub>3</sub>):  $\delta$  = 213.0, 135.6, 128.4, 127.1, 126.4, 107.6, 91.0, 79.0, 72.9, 30.8, 29.8, 29.6, 22.4, 22.0, 19.3, 13.9, 13.6; IR (neat):  $\nu$  = 2956, 2930, 2868, 2216, 1938, 1597, 1493, 1452, 1378, 1325, 1103, 1073, 1031 cm<sup>-1</sup>; MS (70 eV, EI)  $m/z$ : 252 (M<sup>+</sup>, 1.59), 167 (100); HRMS (EI) calcd for C<sub>19</sub>H<sub>24</sub> [M<sup>+</sup>]: 252.1873, found: 252.1872.

## (3) Synthesis of 9-(4-methylphenyl)trideca-7,8-dien-5-yne (3ac, wj-3-043)

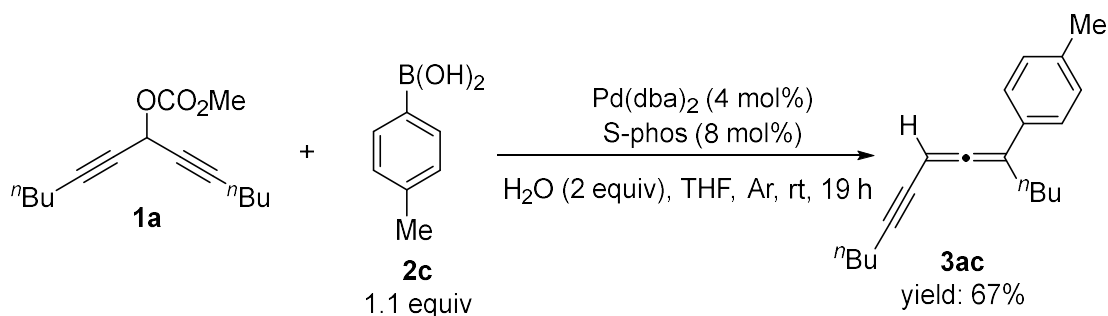

Following **Typical Procedure IV**, the reaction of *p*-tolylboronic acid **2c** (149.6 mg, 1.1 mmol), Pd(dba)<sub>2</sub> (23.1 mg, 0.04 mmol), S-phos (32.8 mg, 0.08 mmol), methyl carbonate **1a** (250.0 mg, 1.0 mmol)/THF (5 mL), and H<sub>2</sub>O (2.0 mmol, 36  $\mu$ L) afforded

the product **3ac** (179.6 mg, 67%) [eluent: petroleum ether (600 mL)]; oil;  $^1\text{H NMR}$  (400 MHz,  $\text{CDCl}_3$ ):  $\delta = 7.28$  (d,  $J = 8.0$  Hz, 2 H, Ar-H), 7.13 (d,  $J = 7.6$  Hz, 2 H, Ar-H), 5.73-5.66 (m, 1 H, CH), 2.51-2.37 (m, 2 H,  $\text{CH}_2$ ), 2.36-2.24 (m, 5 H,  $\text{CH}_3$  and  $\text{CH}_2$ ), 1.59-1.47 (m, 4 H, 2 x  $\text{CH}_2$ ), 1.47-1.34 (m, 4 H, 2 x  $\text{CH}_2$ ), 0.98-0.86 (m, 6 H, 2 x  $\text{CH}_3$ );  $^{13}\text{C NMR}$  (100 MHz,  $\text{CDCl}_3$ ):  $\delta = 212.9, 136.9, 132.6, 129.1, 126.3, 107.5, 90.8, 78.8, 73.1, 30.8, 29.8, 29.6, 22.4, 22.0, 21.1, 19.3, 13.9, 13.6$ ; **IR** (neat):  $\nu = 2957, 2929, 2860, 2215, 1934, 1511, 1462, 1378, 1326, 1185, 1110$   $\text{cm}^{-1}$ ; **MS** (70 eV, EI)  $m/z$ : 266 ( $\text{M}^+$ , 4.86), 165 (100); **HRMS** (EI) calcd for  $\text{C}_{20}\text{H}_{26}$  [ $\text{M}^+$ ]: 266.2029, found: 266.2031.

#### (4) Synthesis of 9-(4-methoxyphenyl)trideca-7,8-dien-5-yne (**3ad**, wj-3-016)

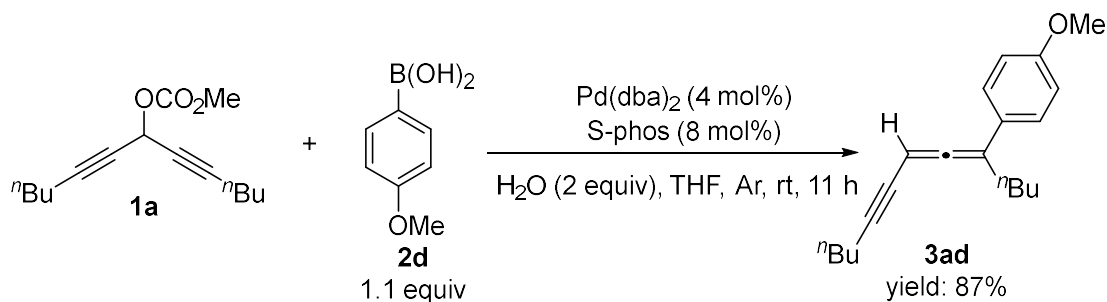

Following **Typical Procedure IV**, the reaction of 4-methoxyphenylboronic acid **2d** (167.3 mg, 1.1 mmol),  $\text{Pd}(\text{dba})_2$  (23.1 mg, 0.04 mmol),  $\text{S-phos}$  (32.9 mg, 0.08 mmol), methyl carbonate **1a** (250.0 mg, 1.0 mmol)/THF (5 mL), and  $\text{H}_2\text{O}$  (2.0 mmol, 36  $\mu\text{L}$ ) afforded the product **3ad** (244.8 mg, 87%) [eluent: petroleum ether / dichloromethane = 5:1 (300 mL)]; oil;  $^1\text{H NMR}$  (400 MHz,  $\text{CDCl}_3$ ):  $\delta = 7.31$  (d,  $J = 8.8$  Hz, 2 H, Ar-H), 6.87 (d,  $J = 8.8$  Hz, 2 H, Ar-H), 5.74-5.67 (m, 1 H, CH), 3.80 (s, 3 H,  $\text{CH}_3$ ), 2.51-2.36 (m, 2 H,  $\text{CH}_2$ ), 2.30 (td,  $J_1 = 7.0$  Hz,  $J_2 = 2.0$  Hz, 2 H,  $\text{CH}_2$ ), 1.59-1.47 (m, 4 H, 2 x  $\text{CH}_2$ ), 1.47-1.36 (m, 4 H, 2 x  $\text{CH}_2$ ), 0.99-0.86 (m, 6 H, 2 x  $\text{CH}_3$ );  $^{13}\text{C NMR}$  (100 MHz,  $\text{CDCl}_3$ ):  $\delta = 212.7, 158.8, 127.8, 127.5, 113.9, 107.2, 90.6, 78.8, 73.2, 55.3, 30.8, 29.8, 29.7, 22.4, 22.0, 19.3, 13.9, 13.6$ ; **IR** (neat):  $\nu = 2954, 2930, 2870, 2859, 2208, 1935, 1606, 1509, 1464, 1294, 1246, 1177, 1109, 1036$   $\text{cm}^{-1}$ ; **MS** (70 eV, EI)  $m/z$ : 282 ( $\text{M}^+$ , 18.97), 165 (100); **HRMS** (EI) calcd for  $\text{C}_{20}\text{H}_{26}\text{O}$  [ $\text{M}^+$ ]: 282.1978, found: 282.1982.



### (5) Synthesis of 9-(2-methoxyphenyl)trideca-7,8-dien-5-yne (**3ae**, wj-3-030)

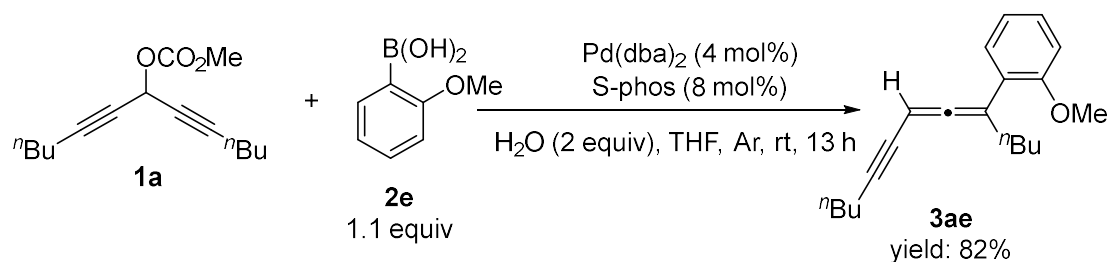

Following **Typical Procedure IV**, the reaction of 2-methoxyphenylboronic acid **2e** (167.2 mg, 1.1 mmol), Pd(dba)<sub>2</sub> (23.1 mg, 0.04 mmol), S-phos (32.9 mg, 0.08 mmol), methyl carbonate **1a** (249.9 mg, 1.0 mmol)/THF (5 mL), and H<sub>2</sub>O (2.0 mmol, 36  $\mu$ L) afforded the product **3ae** (230.4 mg, 82%) [eluent: petroleum ether / dichloromethane = 5:1 (300 mL)]; oil; **<sup>1</sup>H NMR** (400 MHz, CDCl<sub>3</sub>):  $\delta$  = 7.21 (d,  $J$  = 7.6 Hz, 2 H, Ar-H), 6.92 (t,  $J$  = 7.4 Hz, 1 H, CH), 6.87 (d,  $J$  = 8.0 Hz, 1 H, Ar-H), 5.48 (t,  $J$  = 2.2 Hz, 1 H, CH), 3.82 (s, 3 H, CH<sub>3</sub>), 2.49-2.38 (m, 2 H, CH<sub>2</sub>), 2.31 (td,  $J_1$  = 6.9 Hz,  $J_2$  = 2.0 Hz, 2 H, CH<sub>2</sub>), 1.58-1.31 (m, 8 H, 4 x CH<sub>2</sub>), 0.96-0.84 (m, 6 H, 2 x CH<sub>3</sub>); **<sup>13</sup>C NMR** (100 MHz, CDCl<sub>3</sub>):  $\delta$  = 212.6, 156.9, 129.6, 128.5, 125.9, 120.6, 111.3, 105.1, 90.4, 75.7, 73.6, 55.6, 31.8, 30.9, 29.8, 22.3, 22.0, 19.3, 13.9, 13.6; **IR** (neat):  $\nu$  = 2956, 2931, 2870, 2216, 1938, 1595, 1580, 1490, 1461, 1434, 1284, 1051, 1028 cm<sup>-1</sup>; **MS** (70 eV, EI)  $m/z$ : 282 (M<sup>+</sup>, 5.13), 267 (100); **HRMS** (EI) calcd for C<sub>20</sub>H<sub>26</sub>O [M<sup>+</sup>]: 282.1978, found: 282.1983.

### (6) Synthesis of 9-(4-phenylphenyl)trideca-7,8-dien-5-yne (**3af**, wj-3-017)

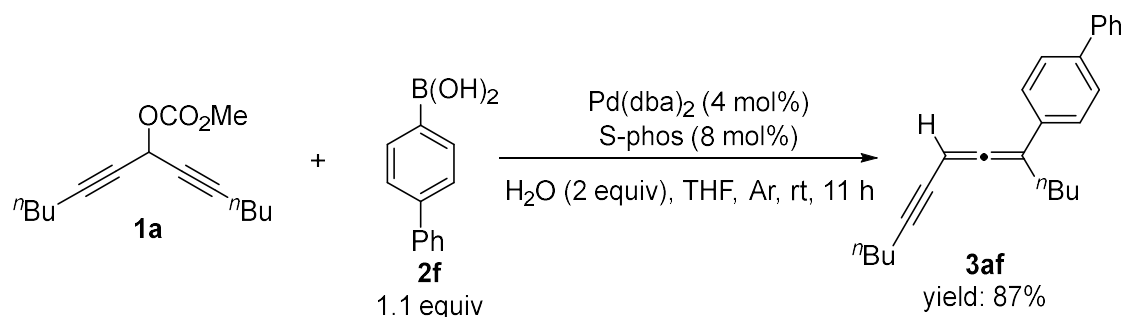

Following **Typical Procedure IV**, the reaction of 4-phenylphenylboronic acid **2f** (217.7 mg, 1.1 mmol), Pd(dba)<sub>2</sub> (23.0 mg, 0.04 mmol), S-phos (32.7 mg, 0.08 mmol),

methyl carbonate **1a** (250.1 mg, 1.0 mmol)/THF (5 mL), and H<sub>2</sub>O (2.0 mmol, 36  $\mu$ L) afforded the product **3af** (286.2 mg, 87%) [eluent: petroleum ether (800 mL)]; oil; <sup>1</sup>H NMR (400 MHz, CDCl<sub>3</sub>):  $\delta$  = 7.63-7.53 (m, 4 H, Ar-H), 7.49-7.39 (m, 4 H, Ar-H), 7.34 (t,  $J$  = 7.4 Hz, 1 H, Ar-H), 5.76 (t,  $J$  = 2.4 Hz, 1 H, CH), 2.58-2.42 (m, 2 H, CH<sub>2</sub>), 2.32 (td,  $J_1$  = 7.0 Hz,  $J_2$  = 2.0 Hz, 2 H, CH<sub>2</sub>), 1.63-1.48 (m, 4 H, 2 x CH<sub>2</sub>), 1.48-1.36 (m, 4 H, 2 x CH<sub>2</sub>), 1.00-0.88 (m, 6 H, 2 x CH<sub>3</sub>); <sup>13</sup>C NMR (100 MHz, CDCl<sub>3</sub>):  $\delta$  = 213.3, 140.7, 139.9, 134.6, 128.8, 127.3, 127.1, 127.0, 126.8, 107.4, 91.2, 79.1, 72.8, 30.8, 29.8, 29.6, 22.4, 22.0, 19.3, 13.9, 13.6; IR (neat):  $\nu$  = 2956, 2930, 2870, 2215, 1933, 1600, 1486, 1462, 1265, 1109, 1006 cm<sup>-1</sup>; MS (70 eV, EI)  $m/z$ : 328 (M<sup>+</sup>, 11.46), 243 (100); HRMS (EI) calcd for C<sub>25</sub>H<sub>28</sub> [M<sup>+</sup>]: 328.2186, found: 328.2187.

#### (7) Synthesis of 9-(4-fluorophenyl)trideca-7,8-dien-5-yne (**3ag**, wj-3-018)

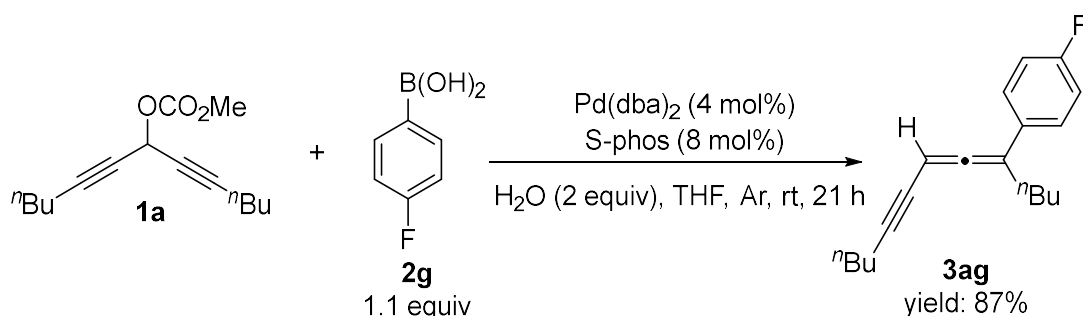

Following **Typical Procedure IV**, the reaction of 4-fluorophenylboronic acid **2g** (154.0 mg, 1.1 mmol), Pd(dba)<sub>2</sub> (23.1 mg, 0.04 mmol), S-phos (32.8 mg, 0.08 mmol), methyl carbonate **1a** (250.0 mg, 1.0 mmol)/THF (5 mL), and H<sub>2</sub>O (2.0 mmol, 36  $\mu$ L) afforded the product **3ag** (235.9 mg, 87%) [eluent: petroleum ether (400 mL)]; oil; <sup>1</sup>H NMR (400 MHz, CDCl<sub>3</sub>):  $\delta$  = 7.41-7.29 (m, 2 H, Ar-H), 7.01 (t,  $J$  = 8.6 Hz, 2 H, Ar-H), 5.79-5.67 (m, 1 H, CH), 2.53-2.36 (m, 2 H, CH<sub>2</sub>), 2.31 (td,  $J_1$  = 7.0 Hz,  $J_2$  = 1.6 Hz, 2 H, CH<sub>2</sub>), 1.61-1.47 (m, 4 H, 2 x CH<sub>2</sub>), 1.47-1.33 (m, 4 H, 2 x CH<sub>2</sub>), 1.03-0.85 (m, 6 H, 2 x CH<sub>3</sub>); <sup>13</sup>C NMR (100 MHz, CDCl<sub>3</sub>):  $\delta$  = 212.8 (d,  $J$  = 2.4 Hz), 162.0 (d,  $J$  = 244.9 Hz), 131.6 (d,  $J$  = 3.2 Hz), 127.9 (d,  $J$  = 7.9 Hz), 115.3 (d,  $J$  = 22.1 Hz), 106.8, 91.2, 79.2, 72.8, 30.8, 29.8, 29.7, 22.4, 22.0, 19.3, 13.9, 13.6; <sup>19</sup>F NMR (376 MHz, CDCl<sub>3</sub>):  $\delta$  = -115.9; IR (neat):  $\nu$  = 2957, 2930, 2861, 2214, 1936, 1601, 1506, 1463,

1230, 1159, 1098, 1014  $\text{cm}^{-1}$ ; **MS** (70 eV, EI)  $m/z$ : 270 ( $\text{M}^+$ , 2.75), 185 (100); **HRMS** (EI) calcd for  $\text{C}_{19}\text{H}_{23}\text{F}$  [ $\text{M}^+$ ]: 270.1778, found: 270.1782.

**(8) Synthesis of 9-(4-chlorophenyl)trideca-7,8-dien-5-yne (3ah, wj-3-019)**

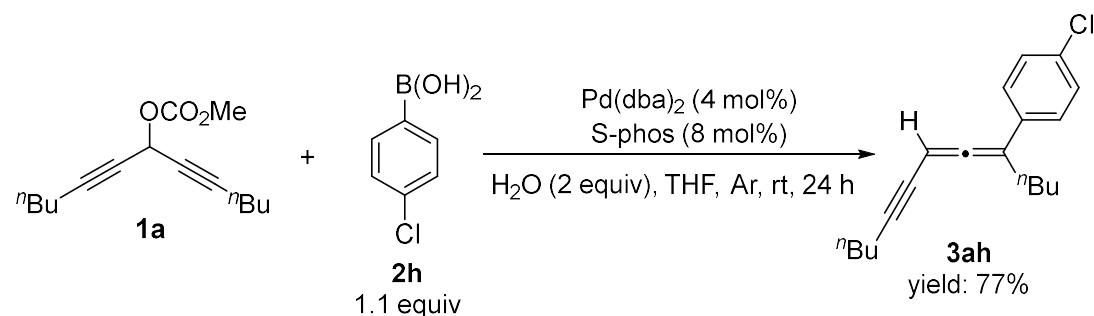

Following **Typical Procedure IV**, the reaction of 4-chlorophenylboronic acid **2h** (172.1 mg, 1.1 mmol),  $\text{Pd}(\text{dba})_2$  (23.0 mg, 0.04 mmol), S-phos (32.7 mg, 0.08 mmol), methyl carbonate **1a** (250.2 mg, 1.0 mmol)/THF (5 mL), and  $\text{H}_2\text{O}$  (2.0 mmol, 36  $\mu\text{L}$ ) afforded the product **3ah** (220.9 mg, 77%) [eluent: petroleum ether (400 mL)]; oil;  **$^1\text{H}$  NMR** (400 MHz,  $\text{CDCl}_3$ ):  $\delta$  = 7.35-7.24 (m, 4 H, Ar-H), 5.78-5.69 (m, 1 H, CH), 2.50-2.35 (m, 2 H,  $\text{CH}_2$ ), 2.31 (td,  $J_1$  = 6.9 Hz,  $J_2$  = 2.0 Hz, 2 H,  $\text{CH}_2$ ), 1.59-1.47 (m, 4 H, 2 x  $\text{CH}_2$ ), 1.47-1.33 (m, 4 H, 2 x  $\text{CH}_2$ ), 1.00-0.84 (m, 6 H, 2 x  $\text{CH}_3$ );  **$^{13}\text{C}$  NMR** (100 MHz,  $\text{CDCl}_3$ ):  $\delta$  = 213.0, 134.2, 132.8, 128.5, 127.6, 106.9, 91.5, 79.5, 72.5, 30.8, 29.7, 29.5, 22.3, 22.0, 19.3, 13.9, 13.6; **IR** (neat):  $\nu$  = 2957, 2930, 2867, 2216, 1936, 1489, 1463, 1380, 1093, 1012  $\text{cm}^{-1}$ ; **MS** (70 eV, EI)  $m/z$ : 288 ( $\text{M}^+$  ( $^{37}\text{Cl}$ ), 0.47), 286 ( $\text{M}^+$  ( $^{35}\text{Cl}$ ), 1.43), 165 (100); **HRMS** (EI) calcd for  $\text{C}_{19}\text{H}_{23}^{35}\text{Cl}$  [ $\text{M}^+$ ]: 286.1483, found: 286.1483.

**(9) Synthesis of 9-(4-bromophenyl)trideca-7,8-dien-5-yne (3ai, wj-3-028)**

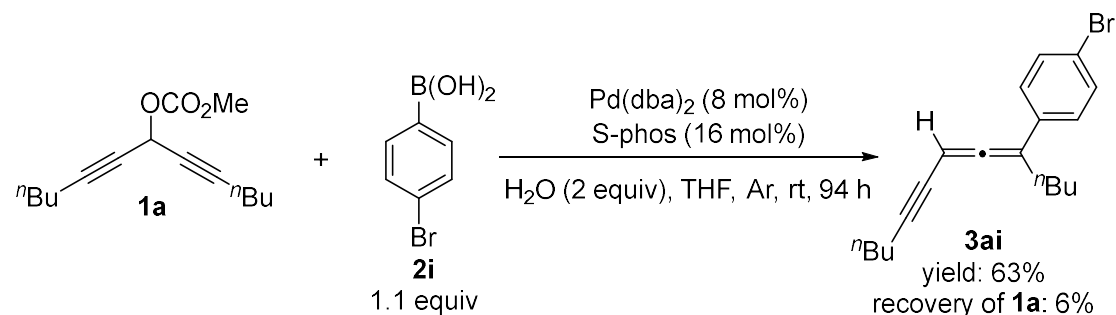

Following **Typical Procedure IV**, the reaction of 4-bromophenylboronic acid **2i**

(220.9 mg, 1.1 mmol), Pd(dba)<sub>2</sub> (46.1 mg, 0.08 mmol), S-phos (65.7 mg, 0.16 mmol), methyl carbonate **1a** (250.3 mg, 1.0 mmol)/THF (5 mL), and H<sub>2</sub>O (2.0 mmol, 36 μL) afforded the product **3ai** (209.0 mg, 63%) [eluent: petroleum ether (400 mL)]; oil; <sup>1</sup>H NMR (400 MHz, CDCl<sub>3</sub>): δ = 7.43 (d, *J* = 8.4 Hz, 2 H, Ar-H), 7.24 (d, *J* = 8.4 Hz, 2 H, Ar-H), 5.77-5.68 (m, 1 H, CH), 2.39-2.35 (m, 2 H, CH<sub>2</sub>), 2.31 (td, *J*<sub>1</sub> = 7.1 Hz, *J*<sub>2</sub> = 2.0 Hz, 2 H, CH<sub>2</sub>), 1.61-1.47 (m, 4 H, 2 x CH<sub>2</sub>), 1.47-1.33 (m, 4 H, 2 x CH<sub>2</sub>), 1.00-0.85 (m, 6 H, 2 x CH<sub>3</sub>); <sup>13</sup>C NMR (100 MHz, CDCl<sub>3</sub>): δ = 213.0, 134.7, 131.5, 128.0, 121.0, 106.9, 91.6, 79.5, 72.5, 30.8, 29.6, 29.5, 22.3, 22.0, 19.3, 13.9, 13.6; IR (neat): ν = 2956, 2930, 2860, 2215, 1936, 1485, 1463, 1380, 1264, 1102, 1073 cm<sup>-1</sup>; MS (70 eV, EI) *m/z*: 332 (M<sup>+</sup>(<sup>81</sup>Br), 1.00), 330 (M<sup>+</sup>(<sup>79</sup>Br), 0.95), 165 (100); HRMS (EI) calcd for C<sub>19</sub>H<sub>23</sub><sup>79</sup>Br [M<sup>+</sup>]: 330.0978, found: 330.0977.

**(10) Synthesis of 9-(4-trifluoromethylphenyl)trideca-7,8-dien-5-yne (3aj, wj-3-031)**

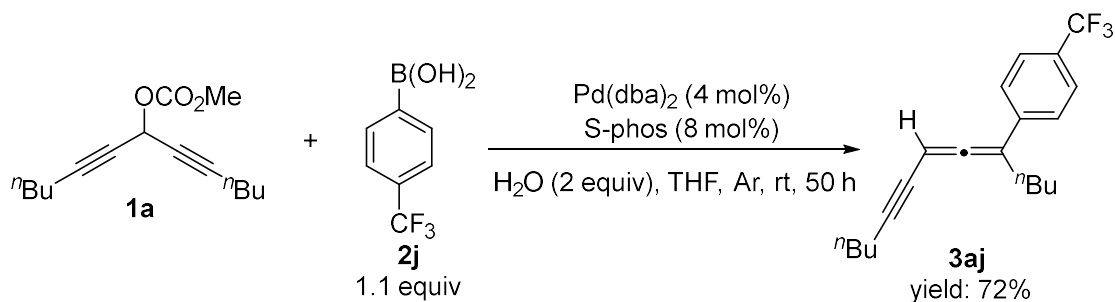

Following **Typical Procedure IV**, the reaction of 4-trifluoromethylphenylboronic **2j** acid (209.1 mg, 1.1 mmol), Pd(dba)<sub>2</sub> (23.1 mg, 0.04 mmol), S-phos (32.9 mg, 0.08 mmol), methyl carbonate **1a** (250.6 mg, 1.0 mmol)/THF (5 mL), and H<sub>2</sub>O (2.0 mmol, 36 μL) afforded the product **3aj** (234.0 mg, 72%) [eluent: petroleum ether (400 mL)]; oil; <sup>1</sup>H NMR (400 MHz, CDCl<sub>3</sub>): δ = 7.57 (d, *J* = 8.0 Hz, 2 H, Ar-H), 7.48 (d, *J* = 8.4 Hz, 2 H, Ar-H), 5.82-5.73 (m, 1 H, CH), 2.55-2.38 (m, 2 H, CH<sub>2</sub>), 2.32 (td, *J*<sub>1</sub> = 6.9 Hz, *J*<sub>2</sub> = 1.6 Hz, 2 H, CH<sub>2</sub>), 1.62-1.48 (m, 4 H, 2 x CH<sub>2</sub>), 1.48-1.35 (m, 4 H, 2 x CH<sub>2</sub>), 1.00-0.86 (m, 6 H, 2 x CH<sub>3</sub>); <sup>13</sup>C NMR (100 MHz, CDCl<sub>3</sub>): δ = 213.6, 139.6, 129.0 (q, *J* = 32.1 Hz), 126.6, 125.3 (q, *J* = 4.0 Hz), 124.2 (q, *J* = 270.2 Hz), 106.9, 92.0, 79.8, 72.2, 30.7, 29.7, 29.5, 22.3, 22.0, 19.3, 13.9, 13.6; <sup>19</sup>F NMR (376 MHz, CDCl<sub>3</sub>): δ = -63.0;

**IR** (neat):  $\nu = 2959, 2932, 2862, 2218, 1937, 1615, 1464, 1323, 1165, 1124, 1068, 1015$   $\text{cm}^{-1}$ ; **MS** (70 eV, EI)  $m/z$ : 320 ( $\text{M}^+$ , 1.71), 165 (100); **HRMS** (EI) calcd for  $\text{C}_{20}\text{H}_{23}\text{F}_3$  [ $\text{M}^+$ ]: 320.1746, found: 320.1753.

**(11) Synthesis of 9-(3-nitrophenyl)trideca-7,8-dien-5-yne (3ak, wj-3-032)**

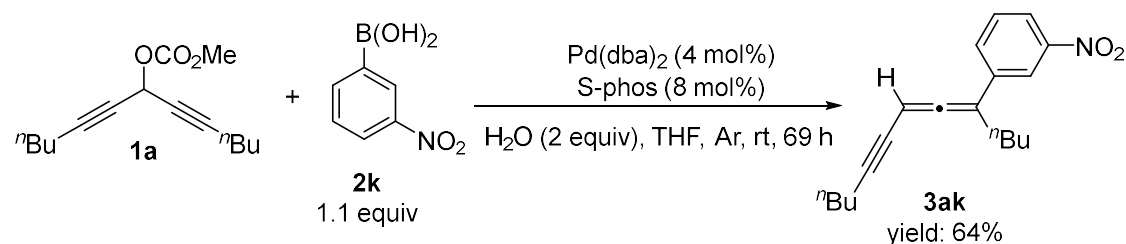

Following **Typical Procedure IV**, the reaction of 3-nitrophenylboronic acid **2k** (183.7 mg, 1.1 mmol),  $\text{Pd}(\text{dba})_2$  (22.9 mg, 0.04 mmol), S-phos (32.8 mg, 0.08 mmol), methyl carbonate **1a** (250.5 mg, 1.0 mmol)/THF (5 mL), and  $\text{H}_2\text{O}$  (2.0 mmol, 36  $\mu\text{L}$ ) afforded the product **3ak** (194.0 mg, 64%) [eluent: petroleum ether / dichloromethane = 5:1 (480 mL)]; oil;  **$^1\text{H NMR}$**  (400 MHz,  $\text{CDCl}_3$ ):  $\delta = 8.20$  (s, 1 H, Ar-H), 8.08 (d,  $J = 8.0$  Hz, 1 H, Ar-H), 7.72 (d,  $J = 7.6$  Hz, 1 H, Ar-H), 7.49 (t,  $J = 8.0$  Hz, 1 H, CH), 5.88-5.80 (m, 1 H, CH), 2.58-2.40 (m, 2 H,  $\text{CH}_2$ ), 2.32 (td,  $J_1 = 7.0$  Hz,  $J_2 = 1.6$  Hz, 2 H,  $\text{CH}_2$ ), 1.64-1.48 (m, 4 H, 2 x  $\text{CH}_2$ ), 1.48-1.36 (m, 4 H, 2 x  $\text{CH}_2$ ), 1.02-0.86 (m, 6 H, 2 x  $\text{CH}_3$ );  **$^{13}\text{C NMR}$**  (100 MHz,  $\text{CDCl}_3$ ):  $\delta = 213.4, 148.6, 137.9, 132.5, 129.2, 121.9, 120.8, 106.4, 92.6, 80.6, 71.9, 30.7, 29.5, 29.4, 22.3, 22.0, 19.3, 13.9, 13.6$ ; **IR** (neat):  $\nu = 2958, 2930, 2870, 2218, 1934, 1527, 1465, 1346, 1097, 1079$   $\text{cm}^{-1}$ ; **MS** (ESI)  $m/z$ : 298 ( $\text{M}+\text{H}^+$ ); **HRMS** (ESI) calcd for  $\text{C}_{19}\text{H}_{24}\text{O}_2\text{N}$  [ $\text{M}+\text{H}^+$ ]: 298.1802, found: 298.1802.

**(12) Synthesis of 9-(4-cynaophenyl)trideca-7,8-dien-5-yne (3al, wj-3-110)**

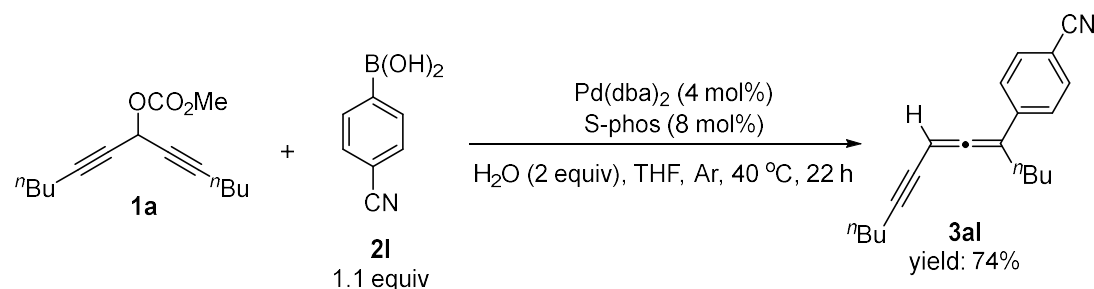

Following **Typical Procedure IV**, the reaction of 4-cynaophenylboronic acid **2l**

(170.0 mg, 1.1 mmol), Pd(dba)<sub>2</sub> (23.0 mg, 0.04 mmol), S-phos (32.8 mg, 0.08 mmol), methyl carbonate **1a** (250.4 mg, 1.0 mmol)/THF (5 mL), and H<sub>2</sub>O (2.0 mmol, 36 μL) afforded the product **3al** (204.1 mg, 74%) [eluent: petroleum ether / ethyl acetate = 50:1 (400 mL)]; oil; <sup>1</sup>H NMR (400 MHz, CDCl<sub>3</sub>): δ = 7.60 (d, *J* = 8.0 Hz, 2 H, Ar-H), 7.47 (d, *J* = 8.0 Hz, 2 H, Ar-H), 5.87-5.77 (m, 1 H, CH), 2.55-2.38 (m, 2 H, CH<sub>2</sub>), 2.32 (t, *J* = 6.8 Hz, 2 H, CH<sub>2</sub>), 1.61-1.48 (m, 4 H, 2 x CH<sub>2</sub>), 1.48-1.33 (m, 4 H, 2 x CH<sub>2</sub>), 1.00-0.84 (m, 6 H, 2 x CH<sub>3</sub>); <sup>13</sup>C NMR (100 MHz, CDCl<sub>3</sub>): δ = 214.1, 140.8, 132.2, 126.9, 119.0, 110.4, 106.9, 92.6, 80.3, 71.8, 30.7, 29.6, 29.2, 22.3, 22.0, 19.3, 13.9, 13.6; IR (neat): ν = 2957, 2931, 2869, 2226, 1933, 1603, 1503, 1462, 1380, 1107, 1017 cm<sup>-1</sup>; MS (DART) *m/z*: 278 (M+H<sup>+</sup>); HRMS (DART) calcd for C<sub>20</sub>H<sub>24</sub>N [M+H<sup>+</sup>]: 278.1903, found: 278.1903.

**(13) Synthesis of 9-(4-formylphenyl)trideca-7,8-dien-5-yne (3am, wj-3-021)**

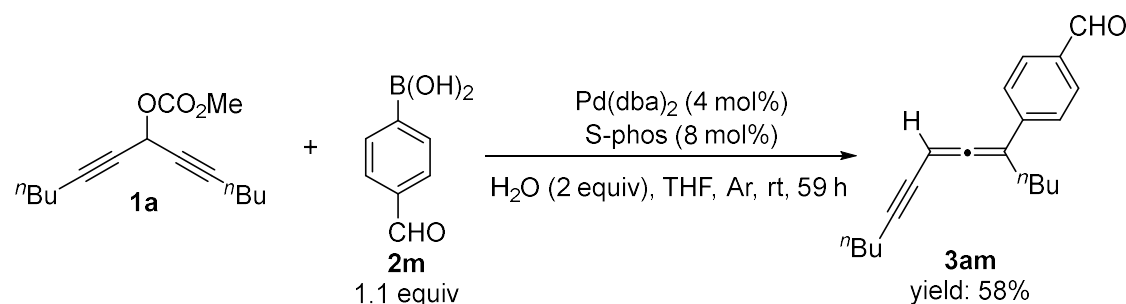

Following **Typical Procedure IV**, the reaction of 4-formylphenylboronic acid **2m** (164.8 mg, 1.1 mmol), Pd(dba)<sub>2</sub> (22.9 mg, 0.04 mmol), S-phos (32.8 mg, 0.08 mmol), methyl carbonate **1a** (250.2 mg, 1.0 mmol)/THF (5 mL), and H<sub>2</sub>O (2.0 mmol, 36 μL) afforded the product **3am** (163.3 mg, 58%) [eluent: petroleum ether / dichloromethane / ethyl ether = 50:1:1 (520 mL)]; oil; <sup>1</sup>H NMR (400 MHz, CDCl<sub>3</sub>): δ = 9.98 (s, 1 H, CHO), 7.83 (d, *J* = 8.0 Hz, 2 H, Ar-H), 7.54 (d, *J* = 8.0 Hz, 2 H, Ar-H), 5.88-5.77 (m, 1 H, CH), 2.57-2.41 (m, 2 H, CH<sub>2</sub>), 2.32 (td, *J*<sub>1</sub> = 6.9 Hz, *J*<sub>2</sub> = 1.6 Hz, 2 H, CH<sub>2</sub>), 1.62-1.48 (m, 4 H, 2 x CH<sub>2</sub>), 1.48-1.36 (m, 4 H, 2 x CH<sub>2</sub>), 1.02-0.84 (m, 6 H, 2 x CH<sub>3</sub>); <sup>13</sup>C NMR (100 MHz, CDCl<sub>3</sub>): δ = 214.3, 191.7, 142.3, 135.0, 129.8, 126.8, 107.3, 92.3, 80.0, 71.9, 30.7, 29.7, 29.4, 22.3, 22.0, 19.3, 13.9, 13.6; IR (neat): ν = 2957, 2931, 2861,

2213, 1933, 1699, 1601, 1463, 1381, 1306, 1212, 1169, 1106  $\text{cm}^{-1}$ ; **MS** (70 eV, EI)  $m/z$ : 280 ( $\text{M}^+$ , 3.56), 165 (100); **HRMS** (EI) calcd for  $\text{C}_{20}\text{H}_{24}\text{O}$  [ $\text{M}^+$ ]: 280.1822, found: 280.1822.

**(14) Synthesis of 9-(4-acetylphenyl)trideca-7,8-dien-5-yne (3an, wj-3-022)**

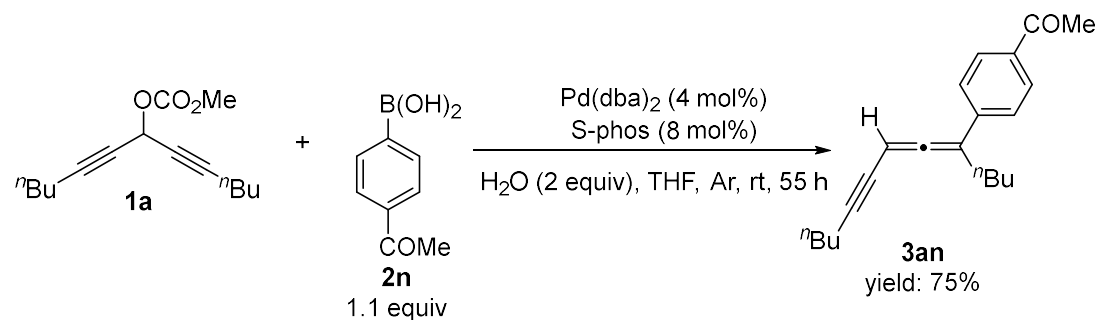

Following **Typical Procedure IV**, the reaction of 4-acetylphenylboronic acid **2n** (180.5 mg, 1.1 mmol), Pd(dba)<sub>2</sub> (22.9 mg, 0.04 mmol), S-phos (32.8 mg, 0.08 mmol), methyl carbonate **1a** (250.5 mg, 1.0 mmol)/THF (5 mL), and H<sub>2</sub>O (2.0 mmol, 36  $\mu\text{L}$ ) afforded the product **3an** (220.8 mg, 75%) [eluent: petroleum ether / dichloromethane / ethyl ether = 25:1:1 (600 mL)]; oil; **<sup>1</sup>H NMR** (400 MHz, CDCl<sub>3</sub>):  $\delta$  = 7.91 (d,  $J$  = 8.0 Hz, 2 H, Ar-H), 7.47 (d,  $J$  = 8.0 Hz, 2 H, Ar-H), 5.83-5.76 (m, 1 H, CH), 2.59 (s, 3 H, CH<sub>3</sub>), 2.55-2.40 (m, 2 H, CH<sub>2</sub>), 2.32 (td,  $J_1$  = 6.9 Hz,  $J_2$  = 2.0 Hz, 2 H, CH<sub>2</sub>), 1.61-1.48 (m, 4 H, 2 x CH<sub>2</sub>), 1.48-1.35 (m, 4 H, 2 x CH<sub>2</sub>), 1.01-0.86 (m, 6 H, 2 x CH<sub>3</sub>); **<sup>13</sup>C NMR** (100 MHz, CDCl<sub>3</sub>):  $\delta$  = 214.0, 197.6, 140.8, 135.6, 128.5, 126.4, 107.3, 92.0, 79.7, 72.1, 30.7, 29.7, 29.4, 26.5, 22.3, 21.9, 19.3, 13.9, 13.6; **IR** (neat):  $\nu$  = 2957, 2930, 2862, 2216, 1935, 1681, 1601, 1463, 1357, 1265, 1185, 1015  $\text{cm}^{-1}$ ; **MS** (70 eV, EI)  $m/z$ : 294 ( $\text{M}^+$ , 23.59), 252 (100); **HRMS** (EI) calcd for  $\text{C}_{21}\text{H}_{26}\text{O}$  [ $\text{M}^+$ ]: 294.1978, found: 294.1978.

**(15) Synthesis of 9-(2-naphthyl)trideca-7,8-dien-5-yne (3ao, wj-3-026)**

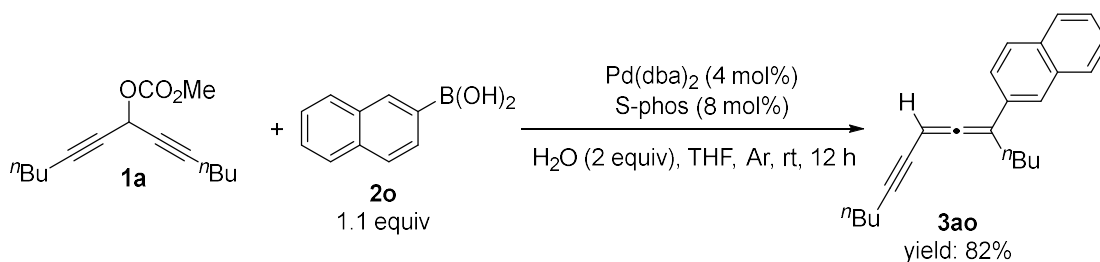

Following **Typical Procedure IV**, the reaction of 2-naphthylboronic acid **2o** (189.3 mg, 1.1 mmol), Pd(dba)<sub>2</sub> (22.9 mg, 0.04 mmol), S-phos (32.7 mg, 0.08 mmol), methyl carbonate **1a** (250.0 mg, 1.0 mmol)/THF (5 mL), and H<sub>2</sub>O (2.0 mmol, 36  $\mu$ L) afforded the product **3ao** (246.6 mg, 82%) [eluent: petroleum ether / ethyl acetate = 300:1 (400 mL) to 100:1 (400 mL)]; oil; <sup>1</sup>H NMR (400 MHz, CDCl<sub>3</sub>):  $\delta$  = 7.85-7.69 (m, 4 H, Ar-H), 7.56 (d,  $J$  = 8.8 Hz, 1 H, Ar-H), 7.50-7.37 (m, 2 H, Ar-H), 5.85-5.76 (m, 1 H, CH), 2.66-2.50 (m, 2 H, CH<sub>2</sub>), 2.32 (td,  $J_1$  = 7.0 Hz,  $J_2$  = 2.0 Hz, 2 H, CH<sub>2</sub>), 1.66-1.35 (m, 8 H, 4 x CH<sub>2</sub>), 1.01-0.85 (m, 6 H, 2 x CH<sub>3</sub>); <sup>13</sup>C NMR (100 MHz, CDCl<sub>3</sub>):  $\delta$  = 213.8, 133.5, 133.0, 132.6, 128.0, 127.8, 127.5, 126.1, 125.8, 125.5, 124.2, 107.9, 91.3, 79.4, 72.8, 30.8, 29.8, 29.5, 22.4, 22.0, 19.3, 14.0, 13.6; IR (neat):  $\nu$  = 2956, 2929, 2869, 2212, 1933, 1597, 1504, 1463, 1266, 1103 cm<sup>-1</sup>; MS (70 eV, EI)  $m/z$ : 302 (M<sup>+</sup>, 11.96), 217 (100); HRMS (EI) calcd for C<sub>23</sub>H<sub>26</sub> [M<sup>+</sup>]: 302.2029, found: 302.2030.

#### (16) Synthesis of 9-(3-thienyl)trideca-7,8-dien-5-yne (**3ap**, wj-3-025)

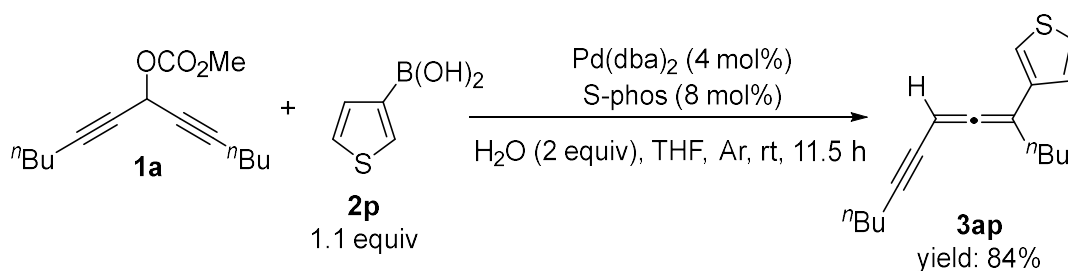

Following **Typical Procedure IV**, the reaction of 3-thiophenylboronic acid **2p** (140.9 mg, 1.1 mmol), Pd(dba)<sub>2</sub> (22.9 mg, 0.04 mmol), S-phos (32.8 mg, 0.08 mmol), methyl carbonate **1a** (250.5 mg, 1.0 mmol)/THF (5 mL), and H<sub>2</sub>O (2.0 mmol, 36  $\mu$ L) afforded the product **3ap** (221.5 mg, 84%) [eluent: petroleum ether (400 mL)]; oil; <sup>1</sup>H NMR (400 MHz, CDCl<sub>3</sub>):  $\delta$  = 7.29-7.20 (m, 1 H, Ar-H), 7.17-7.07 (m, 2 H, Ar-H), 5.69



(t,  $J = 2.4$  Hz, 1 H, CH), 2.50-2.35 (m, 2 H, CH<sub>2</sub>), 2.30 (td,  $J_1 = 7.0$  Hz,  $J_2 = 2.0$  Hz, 2 H, CH<sub>2</sub>), 1.62-1.47 (m, 4 H, 2 x CH<sub>2</sub>), 1.47-1.33 (m, 4 H, 2 x CH<sub>2</sub>), 1.00-0.85 (m, 6 H, 2 x CH<sub>3</sub>); <sup>13</sup>C NMR (100 MHz, CDCl<sub>3</sub>):  $\delta = 213.2, 137.3, 127.0, 125.3, 119.8, 103.8, 91.0, 78.8, 72.9, 30.8, 30.3, 29.7, 22.4, 22.0, 19.2, 13.9, 13.6$ ; IR (neat):  $\nu = 2956, 2928, 2869, 2215, 1936, 1461, 1377, 1326, 1232, 1080$  cm<sup>-1</sup>; MS (70 eV, EI)  $m/z$ : 258 (M<sup>+</sup>, 6.23), 173 (100); HRMS (EI) calcd for C<sub>17</sub>H<sub>22</sub>S [M<sup>+</sup>]: 258.1437, found: 258.1438.

**(17) Synthesis of 9-(3-furyl)trideca-7,8-dien-5-yne (3aq, wj-3-027)**

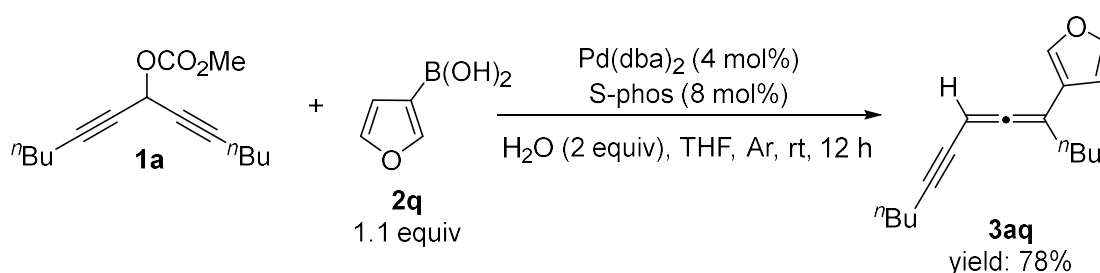

Following **Typical Procedure IV**, the reaction of 3-furanylboronic acid **2q** (128.3 mg, 1.1 mmol), Pd(dba)<sub>2</sub> (23.0 mg, 0.04 mmol), S-phos (32.7 mg, 0.08 mmol), methyl carbonate **1a** (249.9 mg, 1.0 mmol)/THF (5 mL), and H<sub>2</sub>O (2.0 mmol, 36  $\mu$ L) afforded the product **3aq** (189.1 mg, 78%) [eluent: petroleum ether / dichloromethane = 100:1 (600 mL)]; oil; <sup>1</sup>H NMR (400 MHz, CDCl<sub>3</sub>):  $\delta = 7.42-7.36$  (m, 2 H, Ar-H), 6.39 (s, 1 H, Ar-H), 5.70-5.62 (m, 1 H, CH), 2.37-2.22 (m, 4 H, 2 x CH<sub>2</sub>), 1.59-1.47 (m, 4 H, 2 x CH<sub>2</sub>), 1.47-1.34 (m, 4 H, 2 x CH<sub>2</sub>), 0.98-0.87 (m, 6 H, 2 x CH<sub>3</sub>); <sup>13</sup>C NMR (100 MHz, CDCl<sub>3</sub>):  $\delta = 211.9, 143.2, 138.6, 122.2, 109.4, 100.5, 90.9, 78.7, 72.9, 30.8, 30.1, 29.6, 22.3, 22.0, 19.2, 13.9, 13.6$ ; IR (neat):  $\nu = 2957, 2930, 2871, 2216, 1936, 1463, 1160, 1072, 1036, 1011$  cm<sup>-1</sup>; MS (70 eV, EI)  $m/z$ : 242 (M<sup>+</sup>, 11.05), 128 (100); HRMS (EI) calcd for C<sub>17</sub>H<sub>22</sub>O [M<sup>+</sup>]: 242.1665, found: 242.1667.

**(18) Synthesis of 9-(1-cyclopentenyl)trideca-7,8-dien-5-yne (3ar, wj-3-036)**

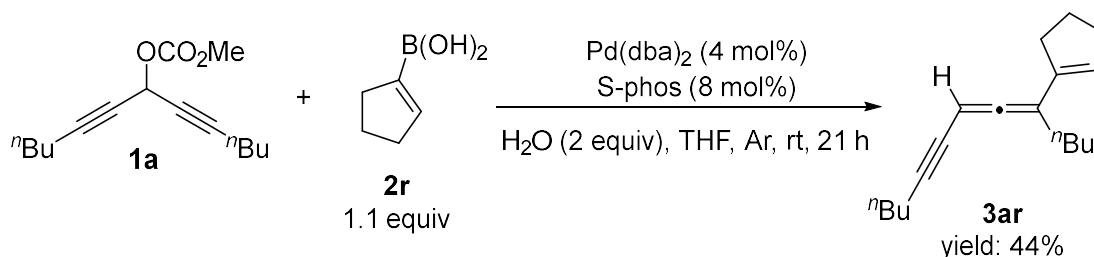

Following **Typical Procedure IV**, the reaction of cyclopent-1-en-1-ylboronic acid **2r** (123.2 mg, 1.1 mmol), Pd(dba)<sub>2</sub> (23.0 mg, 0.04 mmol), S-phos (32.7 mg, 0.08 mmol), methyl carbonate **1a** (250.1 mg, 1.0 mmol)/THF (5 mL), and H<sub>2</sub>O (2.0 mmol, 36  $\mu$ L) afforded the product **3ar** (108.4 mg, 44%) [eluent: petroleum ether (400 mL)]; oil; **<sup>1</sup>H NMR** (400 MHz, CDCl<sub>3</sub>):  $\delta$  = 5.71 (s, 1 H, CH), 5.54 (s, 1 H, Ar-H), 2.49-2.14 (m, 8 H, 4 x CH<sub>2</sub>), 1.88 (quint,  $J$  = 7.5 Hz, 2 H, CH<sub>2</sub>), 1.61-1.23 (m, 8 H, 4 x CH<sub>2</sub>), 1.00-0.82 (m, 6 H, 2 x CH<sub>3</sub>); **<sup>13</sup>C NMR** (100 MHz, CDCl<sub>3</sub>):  $\delta$  = 214.3, 138.9, 126.5, 105.6, 90.2, 77.6, 73.4, 33.9, 33.4, 30.9, 29.9, 29.5, 23.0, 22.5, 22.0, 19.3, 13.9, 13.6; **IR** (neat):  $\nu$  = 2955, 2927, 2860, 2216, 1930, 1720, 1463, 1378, 1326, 1296, 1255, 1037 cm<sup>-1</sup>; **MS** (70 eV, EI)  $m/z$ : 242 (M<sup>+</sup>, 2.18), 129 (100); **HRMS** (EI) calcd for C<sub>18</sub>H<sub>26</sub> [M<sup>+</sup>]: 242.2029, found: 242.2032.

#### (19) Synthesis of 6-phenylhepta-4,5-dien-2-yne (**3bb**, wj-3-107)

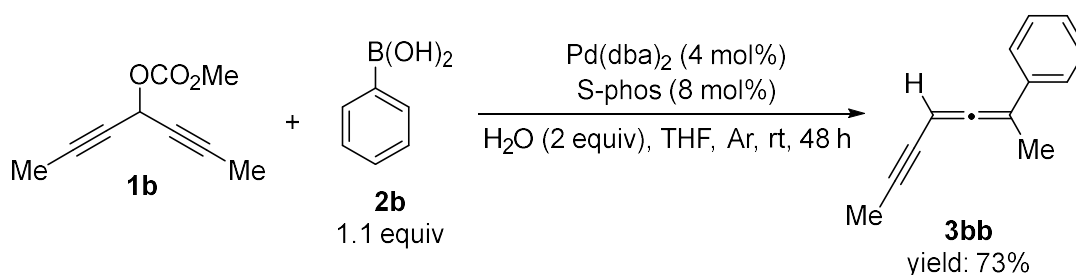

Following **Typical Procedure IV**, the reaction of phenylboronic acid **2b** (134.3 mg, 1.1 mmol), Pd(dba)<sub>2</sub> (23.0 mg, 0.04 mmol), S-phos (32.9 mg, 0.08 mmol), methyl carbonate **1b** (166.1 mg, 1.0 mmol)/THF (5 mL), and H<sub>2</sub>O (2.0 mmol, 36  $\mu$ L) afforded the product **3bb** (123.2 mg, 73%) [eluent: petroleum ether (800 mL)]; oil; **<sup>1</sup>H NMR** (400 MHz, CDCl<sub>3</sub>):  $\delta$  = 7.39 (d,  $J$  = 7.6 Hz, 2 H, Ar-H), 7.33 (t,  $J$  = 7.6 Hz, 2 H, Ar-H), 7.27-7.18 (m, 1 H, Ar-H), 5.70-5.62 (m, 1 H, CH), 2.13 (d,  $J$  = 2.4 Hz, 3 H, CH<sub>3</sub>), 1.94

(d,  $J = 2.0$  Hz, 3 H, CH<sub>3</sub>); <sup>13</sup>C NMR (100 MHz, CDCl<sub>3</sub>):  $\delta = 213.3, 135.7, 128.4, 127.2, 126.1, 102.6, 86.5, 77.8, 72.1, 16.7, 4.4$ ; IR (neat):  $\nu = 2971, 2915, 2220, 1940, 1750, 1597, 1493, 1442, 1371, 1260, 1067, 1026$  cm<sup>-1</sup>; MS (70 eV, EI)  $m/z$ : 168 (M<sup>+</sup>, 60.44), 152 (100); HRMS (EI) calcd for C<sub>13</sub>H<sub>12</sub> [M<sup>+</sup>]: 168.0934, found: 168.0932.

**(20) Synthesis of 11-phenylheptadeca-9,10-dien-7-yne (3cb, wj-3-085)**

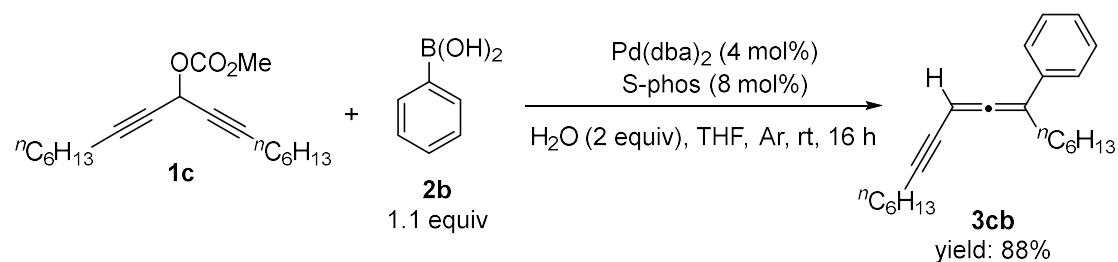

Following **Typical Procedure IV**, the reaction of phenylboronic acid **2b** (134.2 mg, 1.1 mmol), Pd(dba)<sub>2</sub> (23.1 mg, 0.04 mmol), S-phos (32.9 mg, 0.08 mmol), methyl carbonate **1c** (306.6 mg, 1.0 mmol)/THF (5 mL), and H<sub>2</sub>O (2.0 mmol, 36  $\mu$ L) afforded the product **3cb** (281.1 mg, 88%) [eluent: petroleum ether (500 mL)]; oil; <sup>1</sup>H NMR (400 MHz, CDCl<sub>3</sub>):  $\delta = 7.39$  (d,  $J = 7.6$  Hz, 2 H, Ar-H), 7.32 (t,  $J = 7.4$  Hz, 2 H, Ar-H), 7.21 (t,  $J = 7.2$  Hz, 1 H, Ar-H), 5.78-5.66 (m, 1 H, CH), 2.54-2.37 (m, 2 H, CH<sub>2</sub>), 2.30 (t,  $J = 7.0$  Hz, 2 H, CH<sub>2</sub>), 1.64-1.46 (m, 4 H, 2 x CH<sub>2</sub>), 1.46-1.18 (m, 12 H, 6 x CH<sub>2</sub>), 0.96-0.79 (m, 6 H, 2 x CH<sub>3</sub>); <sup>13</sup>C NMR (100 MHz, CDCl<sub>3</sub>):  $\delta = 213.1, 135.7, 128.4, 127.1, 126.4, 107.7, 91.1, 79.0, 72.9, 31.7, 31.3, 29.9, 29.0, 28.7, 28.6, 27.6, 22.7, 22.5, 19.6, 14.1, 14.0$ ; IR (neat):  $\nu = 2955, 2926, 2856, 2218, 1938, 1597, 1493, 1453, 1378, 1073, 1029$  cm<sup>-1</sup>; MS (70 eV, EI)  $m/z$ : 308 (M<sup>+</sup>, 1.86), 167 (100); HRMS (EI) calcd for C<sub>23</sub>H<sub>32</sub> [M<sup>+</sup>]: 308.2499, found: 308.2502.

**(21) Synthesis of 5-phenyl-1,5-dicyclopropylpenta-3,4-dien-1-yne (3db, wj-3-086)**

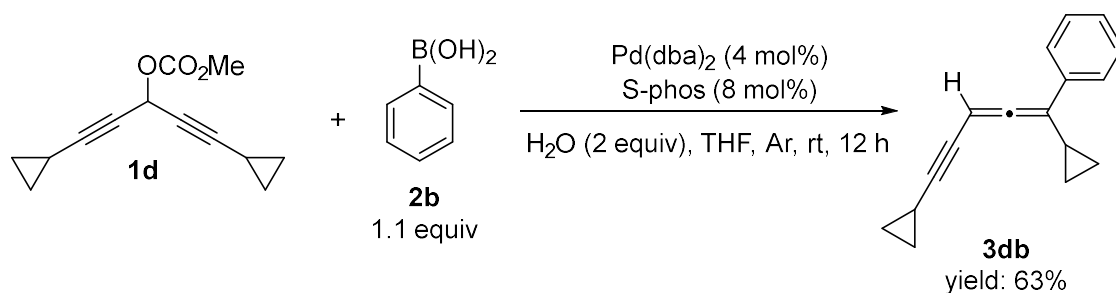

Following **Typical Procedure IV**, the reaction of phenylboronic acid **2b** (134.2 mg, 1.1 mmol), Pd(dba)<sub>2</sub> (23.0 mg, 0.04 mmol), S-phos (32.9 mg, 0.08 mmol), methyl carbonate **1d** (218.1 mg, 1.0 mmol)/THF (5 mL), and H<sub>2</sub>O (2.0 mmol, 36 μL) afforded the product **3db** (163.2 mg, 63%, purity: 85%) [eluent: petroleum ether (300 mL) to petroleum ether / ethyl acetate = 150:1 (300 mL)]; oil; <sup>1</sup>H NMR (400 MHz, CDCl<sub>3</sub>): δ = 7.55 (d, *J* = 8.0 Hz, 2 H, Ar-H), 7.34 (t, *J* = 7.6 Hz, 2 H, Ar-H), 7.27-7.20 (m, 1 H, Ar-H), 5.71 (s, 1 H, CH), 1.64-1.54 (m, 1 H, CH), 1.39-1.28 (m, 1 H, CH), 0.95-0.83 (m, 2 H, CH<sub>2</sub>), 0.83-0.74 (m, 2 H, CH<sub>2</sub>), 0.74-0.67 (m, 2 H, CH<sub>2</sub>), 0.63-0.51 (m, 2 H, CH<sub>2</sub>); <sup>13</sup>C NMR (100 MHz, CDCl<sub>3</sub>): δ = 212.8, 135.9, 128.4, 127.3, 126.6, 111.1, 93.8, 80.1, 68.0, 10.8, 8.4, 7.1, 6.9, 0.3; IR (neat): ν = 3082, 3006, 2214, 1932, 1597, 1492, 1449, 1424, 1215, 1051, 1026 cm<sup>-1</sup>; MS (70 eV, EI) *m/z*: 220 (M<sup>+</sup>, 8.66), 191 (100); HRMS (EI) calcd for C<sub>17</sub>H<sub>16</sub> [M<sup>+</sup>]: 220.1247, found: 220.1250.

## (22) Synthesis of 8-phenyl-1,11-dichloroundeca-6,7-dien-4-yne (**3eb**, wj-3-083)

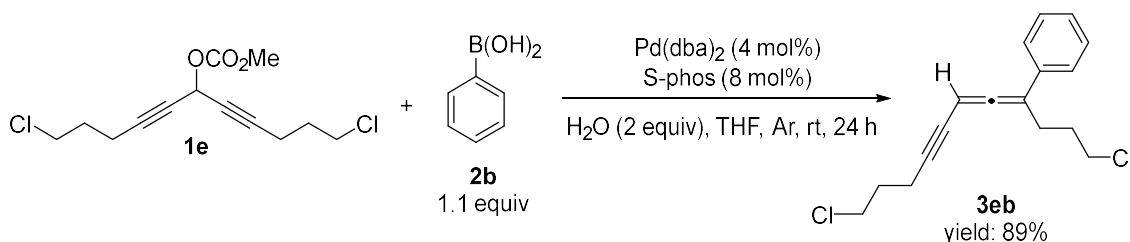

Following **Typical Procedure IV**, the reaction of phenylboronic acid **2b** (134.3 mg, 1.1 mmol), Pd(dba)<sub>2</sub> (22.9 mg, 0.04 mmol), S-phos (32.8 mg, 0.08 mmol), methyl carbonate **1e** (291.3 mg, 1.0 mmol)/THF (5 mL), and H<sub>2</sub>O (2.0 mmol, 36 μL) afforded the product **3eb** (271.7 mg, 89%) [eluent: petroleum ether / ethyl acetate = 100:1 (600 mL)]; oil; <sup>1</sup>H NMR (400 MHz, CDCl<sub>3</sub>): δ = 7.45-7.30 (m, 4 H, Ar-H), 7.29-7.22 (m, 1 H, Ar-H), 5.83-5.69 (m, 1 H, CH), 3.76-3.59 (m, 4 H, 2 x CH<sub>2</sub>), 2.73-2.57 (m, 2 H,

CH<sub>2</sub>), 2.51 (t, *J* = 6.8 Hz, 2 H, CH<sub>2</sub>), 2.12-1.92 (m, 4 H, 2 x CH<sub>2</sub>); <sup>13</sup>C NMR (100 MHz, CDCl<sub>3</sub>): δ = 212.9, 134.9, 128.6, 127.5, 126.3, 106.7, 89.4, 79.6, 73.6, 44.4, 43.7, 31.3, 30.4, 26.9, 17.0; IR (neat): ν = 2960, 2217, 1937, 1597, 1493, 1441, 1289, 1073, 1030 cm<sup>-1</sup>; MS (ESI) *m/z*: 293 (M(<sup>35</sup>Cl<sub>2</sub>)+H<sup>+</sup>); HRMS (ESI) calcd for C<sub>17</sub>H<sub>19</sub><sup>35</sup>Cl<sub>2</sub> [M(<sup>35</sup>Cl<sub>2</sub>)+H<sup>+</sup>]: 293.0858, found: 293.0854.

### (23) Synthesis of 5-phenyltrideca-5,6-dien-8-ynedinitrile (**3fb**, wj-3-106)

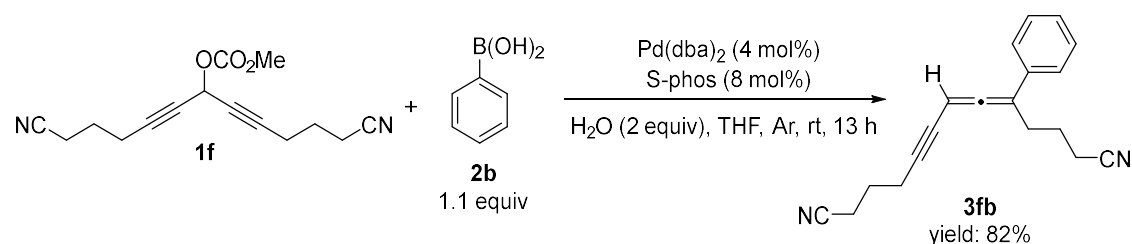

Following **Typical Procedure IV**, the reaction of phenylboronic acid **2b** (134.0 mg, 1.1 mmol), Pd(dba)<sub>2</sub> (23.0 mg, 0.04 mmol), S-phos (32.9 mg, 0.08 mmol), methyl carbonate **1f** (272.5 mg, 1.0 mmol)/THF (5 mL), and H<sub>2</sub>O (2.0 mmol, 36 μL) afforded the product **3fb** (225.3 mg, 82%) [eluent: petroleum ether / ethyl ether / dichloromethane = 10:1:1 (320 mL) to 5:1:1 (700 mL)]; oil; <sup>1</sup>H NMR (400 MHz, CDCl<sub>3</sub>): δ = 7.42-7.32 (m, 4 H, Ar-H), 7.31-7.23 (m, 1 H, Ar-H), 5.83-5.74 (m, 1 H, CH), 2.73-2.58 (m, 2 H, CH<sub>2</sub>), 2.56-2.39 (m, 6 H, 3 x CH<sub>2</sub>), 2.02-1.83 (m, 4 H, 2 x CH<sub>2</sub>); <sup>13</sup>C NMR (100 MHz, CDCl<sub>3</sub>): δ = 212.8, 134.3, 128.7, 127.8, 126.3, 119.4, 119.1, 106.4, 88.7, 79.7, 74.3, 28.5, 24.5, 23.4, 18.6, 16.5, 16.2; IR (neat): ν = 2942, 2246, 1939, 1597, 1493, 1450, 1425, 1311, 1073, 1029 cm<sup>-1</sup>; MS (70 eV, EI) *m/z*: 274 (M<sup>+</sup>, 27.41), 220 (100); HRMS (EI) calcd for C<sub>19</sub>H<sub>18</sub>N<sub>2</sub> [M<sup>+</sup>]: 274.1465, found: 274.1466.

### (24) Synthesis of 7-phenylnona-5,6-dien-3-yn-1,9-diyl di(tert-butyldimethylsilyl) ether (**3gb**, wj-3-084)

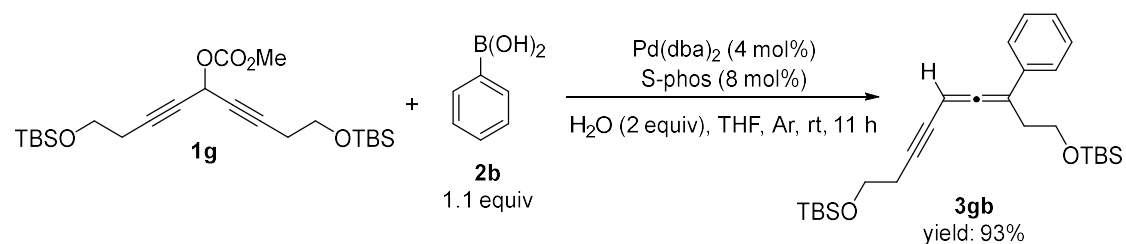

Following **Typical Procedure IV**, the reaction of phenylboronic acid **2b** (134.2 mg, 1.1 mmol), Pd(dba)<sub>2</sub> (23.0 mg, 0.04 mmol), S-phos (32.9 mg, 0.08 mmol), methyl carbonate **1g** (454.5 mg, 1.0 mmol)/THF (5 mL), and H<sub>2</sub>O (2.0 mmol, 36 μL) afforded the product **3gb** (424.0 mg, 93%) [eluent: petroleum ether / ethyl ether / dichloromethane = 100:1:1 (500 mL)]; oil; **<sup>1</sup>H NMR** (400 MHz, CDCl<sub>3</sub>): δ = 7.39 (d, *J* = 7.6 Hz, 2 H, Ar-H), 7.32 (t, *J* = 7.4 Hz, 2 H, Ar-H), 7.22 (t, *J* = 7.2 Hz, 1 H, Ar-H), 5.75-5.64 (m, 1 H, CH), 3.81 (t, *J* = 7.2 Hz, 2 H, CH<sub>2</sub>), 3.74 (t, *J* = 7.0 Hz, 2 H, CH<sub>2</sub>), 2.75-2.65 (m, 2 H, CH<sub>2</sub>), 2.57-2.48 (m, 2 H, CH<sub>2</sub>), 0.89 (s, 18 H, 6 x CH<sub>3</sub>), 0.07 (s, 6 H, 2 x CH<sub>3</sub>), 0.04 (s, 6 H, 2 x CH<sub>3</sub>); **<sup>13</sup>C NMR** (100 MHz, CDCl<sub>3</sub>): δ = 213.3, 135.1, 128.4, 127.3, 126.4, 104.7, 88.1, 78.8, 73.9, 61.9, 61.7, 33.3, 25.91, 25.88, 24.0, 18.33, 18.27, -5.28, -5.32; **IR** (neat): ν = 2955, 2928, 2856, 2220, 1940, 1471, 1388, 1253, 1097, 1006 cm<sup>-1</sup>; **MS** (70 eV, EI) *m/z*: 456 (M<sup>+</sup>, 1.59), 73 (100); **HRMS** (EI) calcd for C<sub>27</sub>H<sub>44</sub>O<sub>2</sub>Si<sub>2</sub> [M<sup>+</sup>]: 456.2874, found: 456.2878.

**(25) Synthesis of 5-(1-cyclohexenyl)-1,5-diphenylpenta-3,4-dien-1-yne (3hs, wj-3-056)**

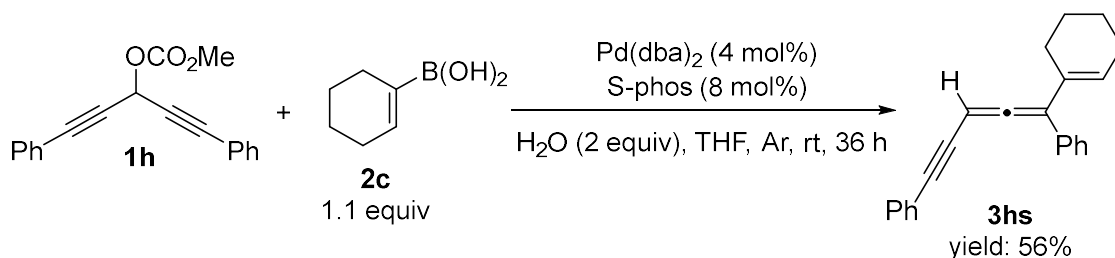

Following **Typical Procedure IV**: the reaction of cyclohex-1-en-1-ylboronic acid **2s** (138.5 mg, 1.1 mmol), Pd(dba)<sub>2</sub> (22.9 mg, 0.04 mmol), S-phos (32.9 mg, 0.08 mmol), methyl carbonate **1h** (290.5 mg, 1.0 mmol)/THF (5 mL), and H<sub>2</sub>O (2.0 mmol, 36 μL) afforded the product **3hs** (165.3 mg, 56%) [eluent: petroleum ether / ethyl ether / dichloromethane = 300:1:1 (450 mL) to 200:1:1 (400 mL)]; oil; **<sup>1</sup>H NMR** (400 MHz, CDCl<sub>3</sub>): δ = 7.49-7.39 (m, 2 H, Ar-H), 7.38-7.24 (m, 8 H, Ar-H), 5.96 (s, 1 H, CH), 5.72-5.62 (m, 1 H, CH), 2.33-2.16 (m, 2 H, CH<sub>2</sub>), 2.16-2.04 (m, 2 H, CH<sub>2</sub>), 1.79-1.68 (m, 2 H, CH<sub>2</sub>), 1.67-1.58 (m, 2 H, CH<sub>2</sub>); **<sup>13</sup>C NMR** (100 MHz, CDCl<sub>3</sub>): δ = 214.2, 135.3,

131.9, 131.5, 129.3, 128.7, 128.3, 128.2, 128.0, 127.5, 123.5, 113.8, 89.8, 82.5, 78.4, 27.5, 26.0, 22.8, 22.1; **IR** (neat):  $\nu = 3056, 2928, 2247, 1920, 1596, 1489, 1443, 1071, 1027 \text{ cm}^{-1}$ ; **MS** (70 eV, EI)  $m/z$ : 296 ( $M^+$ , 100); **HRMS** (EI) calcd for  $C_{23}H_{20} [M^+]$ : 296.1560, found: 296.1562.

### Synthesis of conjugated allenes with Gorlos-phos:

#### (1) Synthesis of 9-(3-methoxyphenyl)trideca-7,8-dien-5-yne (**3aa**, wj-5-054)

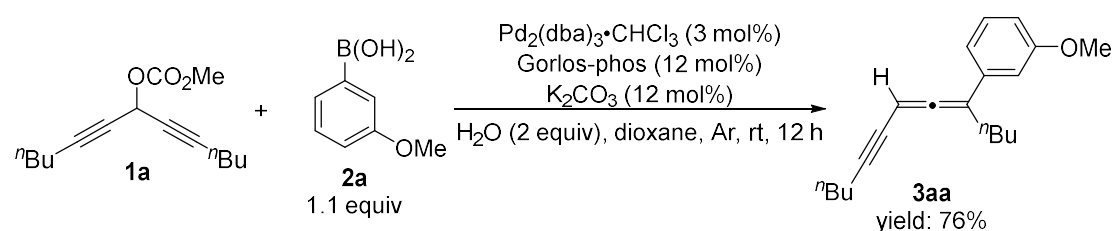

**Typical Procedure V:** To a Schlenk tube were added 3-methoxyphenylboronic acid **2a** (167.4 mg, 1.1 mmol),  $Pd_2(dba)_3 \cdot CHCl_3$  (31.1 mg, 0.03 mmol), Gorlos-phos (57.3 mg, 0.12 mmol), and  $K_2CO_3$  (16.6 mg, 0.12 mmol). After adding all of solid chemicals, the flask was degassed and refilled with Ar for three times. Then methyl carbonate **1a** (250.3 mg, 1.0 mmol)/dioxane (5 mL), and  $H_2O$  (2.0 mmol, 36  $\mu$ L) were added sequentially. After that, the Ar gas line was closed and the resulting mixture was stirred at room temperature for 12 h as monitored by TLC, diluted with ethyl acetate (5 mL), filtrated through a short column of silica gel (3 cm) eluted with ethyl acetate (20 mL), and evaporated. The resulting residue was purified by chromatography on silica gel to afford the product **3aa** (215.1 mg, 76%) [eluent: petroleum ether / dichloromethane = 10:1 (550 mL)]; oil;  **$^1H$  NMR** (400 MHz,  $CDCl_3$ ):  $\delta = 7.24$  (t,  $J = 8.0$  Hz, 1 H, Ar-H), 6.99 (d,  $J = 7.6$  Hz, 1 H, Ar-H), 6.94 (t,  $J = 2.0$  Hz, 1 H, Ar-H), 6.77 (dd,  $J_1 = 8.0$  Hz,  $J_2 = 2.2$  Hz, 1 H, Ar-H), 5.71 (quint,  $J = 2.6$  Hz, 1 H, CH), 3.81 (s, 3 H,  $CH_3$ ), 2.52-2.37 (m, 2 H,  $CH_2$ ), 2.30 (td,  $J_1 = 7.0$  Hz,  $J_2 = 2.4$  Hz, 2 H,  $CH_2$ ), 1.59-1.47 (m, 4 H, 2 x  $CH_2$ ), 1.47-1.35 (m, 4 H, 2 x  $CH_2$ ), 0.98-0.86 (m, 6 H, 2 x  $CH_3$ );  **$^{13}C$  NMR** (100 MHz,  $CDCl_3$ ):  $\delta = 213.1, 159.7, 137.3, 129.3, 119.0, 112.37, 112.35, 107.6, 91.1, 79.0, 72.8, 55.2, 30.8, 29.8, 29.7, 22.4, 22.0, 19.3, 13.9, 13.6$ .

## (2) Synthesis of 9-(4-methoxyphenyl)trideca-7,8-dien-5-yne (3ad, wj-5-059)

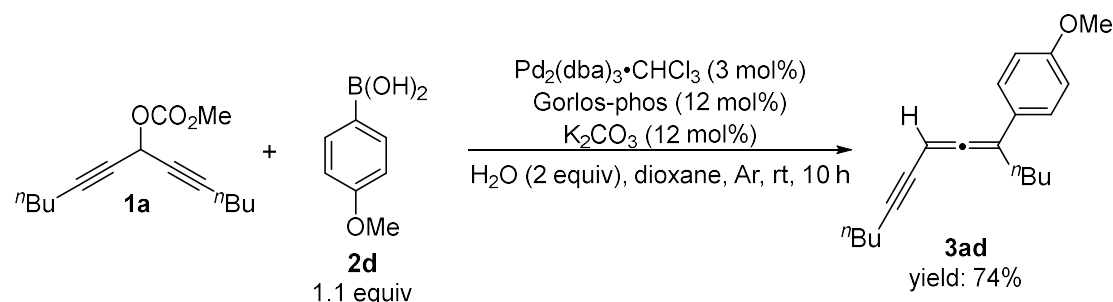

Following **Typical Procedure V**, the reaction of 4-methoxyphenylboronic acid **2d** (172.4 mg, 1.1 mmol),  $\text{Pd}_2(\text{dba})_3 \cdot \text{CHCl}_3$  (31.0 mg, 0.03 mmol), Gorlos-phos (57.4 mg, 0.12 mmol),  $\text{K}_2\text{CO}_3$  (16.6 mg, 0.12 mmol), methyl carbonate **1a** (250.0 mg, 1.0 mmol)/dioxane (5.0 mL), and  $\text{H}_2\text{O}$  (2.0 mmol, 36  $\mu\text{L}$ ) afforded the product **3ad** (209.6 mg, 74%) [eluent: petroleum ether / dichloromethane = 6:1 (400 mL)]; oil;  $^1\text{H NMR}$  (400 MHz,  $\text{CDCl}_3$ ):  $\delta$  = 7.35-7.27 (m, 2 H, Ar-H), 6.90-6.82 (m, 2 H, Ar-H), 5.69 (quint,  $J$  = 2.6 Hz, 1 H, CH), 3.80 (s, 3 H,  $\text{CH}_3$ ), 2.50-2.35 (m, 2 H,  $\text{CH}_2$ ), 2.30 (td,  $J_1$  = 7.0 Hz,  $J_2$  = 2.4 Hz, 2 H,  $\text{CH}_2$ ), 1.58-1.47 (m, 4 H, 2 x  $\text{CH}_2$ ), 1.47-1.36 (m, 4 H, 2 x  $\text{CH}_2$ ), 0.98-0.87 (m, 6 H, 2 x  $\text{CH}_3$ );  $^{13}\text{C NMR}$  (100 MHz,  $\text{CDCl}_3$ ):  $\delta$  = 212.7, 158.8, 127.8, 127.5, 113.9, 107.2, 90.6, 78.8, 73.2, 55.3, 30.8, 29.8, 29.7, 22.4, 22.0, 19.3, 13.9, 13.6.

## (3) Synthesis of 9-(2-methoxyphenyl)trideca-7,8-dien-5-yne (3ae, wj-5-072)

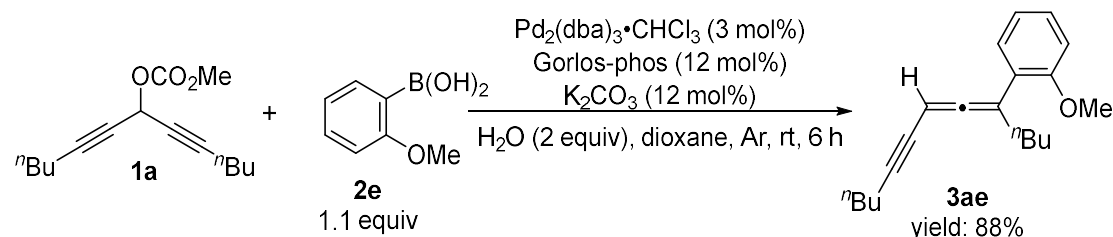

Following **Typical Procedure V**, the reaction of 2-methoxyphenylboronic acid **2e** (167.1 mg, 1.1 mmol),  $\text{Pd}_2(\text{dba})_3 \cdot \text{CHCl}_3$  (31.2 mg, 0.03 mmol), Gorlos-phos (57.5 mg, 0.12 mmol),  $\text{K}_2\text{CO}_3$  (16.6 mg, 0.12 mmol), methyl carbonate **1a** (250.4 mg, 1.0 mmol)/dioxane (5.0 mL), and  $\text{H}_2\text{O}$  (2.0 mmol, 36  $\mu\text{L}$ ) afforded the product **3ae** (247.3 mg, 88%) [eluent: petroleum ether / dichloromethane = 10:1 (440 mL)]; oil;  $^1\text{H NMR}$



(400 MHz, CDCl<sub>3</sub>):  $\delta$  = 7.27-7.18 (m, 2 H, Ar-H), 6.92 (td,  $J_1$  = 7.5 Hz,  $J_2$  = 1.2 Hz, 1 H, CH), 6.87 (d,  $J$  = 8.0 Hz, 1 H, Ar-H), 5.48 (quint,  $J$  = 2.6 Hz, 1 H, CH), 3.82 (s, 3 H, CH<sub>3</sub>), 2.49-2.39 (m, 2 H, CH<sub>2</sub>), 2.31 (td,  $J_1$  = 7.1 Hz,  $J_2$  = 2.4 Hz, 2 H, CH<sub>2</sub>), 1.58-1.31 (m, 8 H, 4 x CH<sub>2</sub>), 0.98-0.84 (m, 6 H, 2 x CH<sub>3</sub>); <sup>13</sup>C NMR (100 MHz, CDCl<sub>3</sub>):  $\delta$  = 212.6, 156.9, 129.6, 128.5, 126.0, 120.6, 111.3, 105.1, 90.4, 75.7, 73.7, 55.6, 31.8, 30.9, 29.8, 22.3, 22.0, 19.3, 13.9, 13.6.

#### (4) Synthesis of 9-(4-phenylphenyl)trideca-7,8-dien-5-yne (3af, wj-5-060)

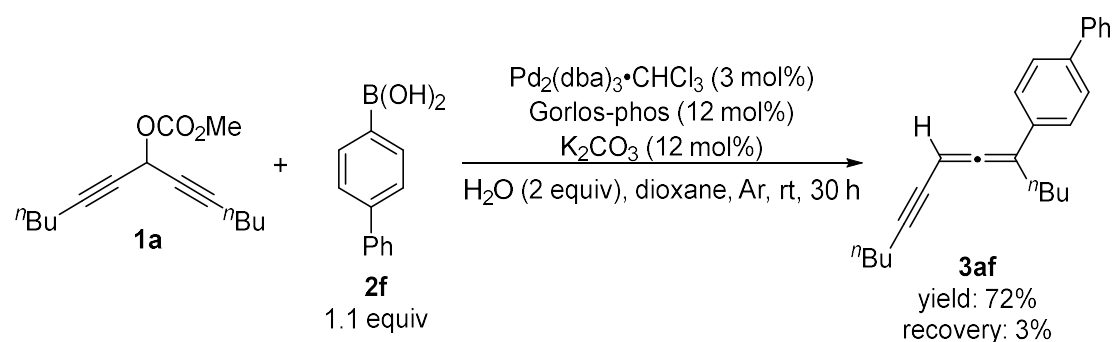

Following **Typical Procedure V**, the reaction of 4-phenylphenylboronic acid **2f** (217.8 mg, 1.1 mmol), Pd<sub>2</sub>(dba)<sub>3</sub>·CHCl<sub>3</sub> (31.1 mg, 0.03 mmol), Gorlos-phos (57.4 mg, 0.12 mmol), K<sub>2</sub>CO<sub>3</sub> (16.6 mg, 0.12 mmol), methyl carbonate **1a** (250.3 mg, 1.0 mmol)/dioxane (5.0 mL), and H<sub>2</sub>O (2.0 mmol, 36  $\mu$ L) afforded the product **3af** (235.4 mg, 72%) [eluent: petroleum ether: 700 mL]; oil; <sup>1</sup>H NMR (400 MHz, CDCl<sub>3</sub>):  $\delta$  = 7.61-7.52 (m, 4 H, Ar-H), 7.49-7.38 (m, 4 H, Ar-H), 7.36-7.29 (m, 1 H, Ar-H), 5.75 (quint,  $J$  = 2.6 Hz, 1 H, CH), 2.57-2.41 (m, 2 H, CH<sub>2</sub>), 2.30 (td,  $J_1$  = 7.0 Hz,  $J_2$  = 2.4 Hz, 2 H, CH<sub>2</sub>), 1.64-1.35 (m, 8 H, 4 x CH<sub>2</sub>), 0.99-0.87 (m, 6 H, 2 x CH<sub>3</sub>); <sup>13</sup>C NMR (100 MHz, CDCl<sub>3</sub>):  $\delta$  = 213.3, 140.7, 139.9, 134.6, 128.8, 127.2, 127.1, 126.9, 126.8, 107.4, 91.2, 79.2, 72.9, 30.8, 29.8, 29.6, 22.4, 22.0, 19.3, 13.9, 13.6.

#### (5) Synthesis of 9-(4-acetylphenyl)trideca-7,8-dien-5-yne (3an, wj-5-073)

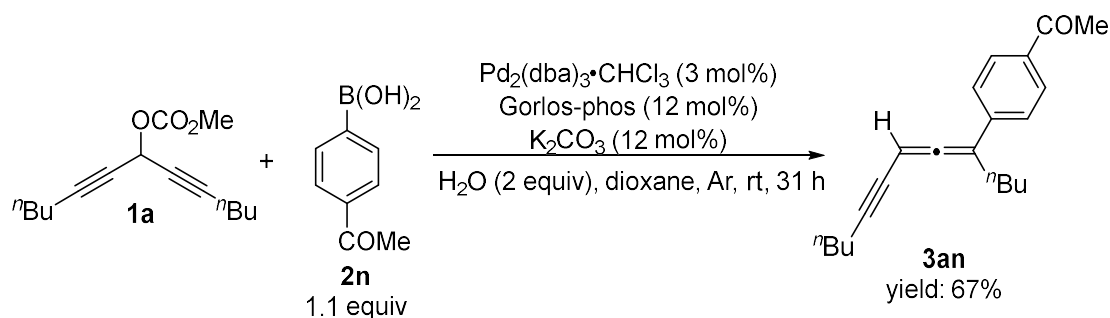

Following **Typical Procedure V**, the reaction of 4-acetylphenylboronic acid **2n** (180.4 mg, 1.1 mmol),  $\text{Pd}_2(\text{dba})_3 \cdot \text{CHCl}_3$  (31.1 mg, 0.03 mmol), Gorlos-phos (57.5 mg, 0.12 mmol),  $\text{K}_2\text{CO}_3$  (16.6 mg, 0.12 mmol), methyl carbonate **1a** (250.3 mg, 1.0 mmol)/dioxane (5.0 mL), and  $\text{H}_2\text{O}$  (2.0 mmol, 36  $\mu\text{L}$ ) afforded the product **3an** (196.3 mg, 67%) [eluent: petroleum ether / dichloromethane / ethyl ether = 25:1:1 (500 mL)]; oil;  $^1\text{H NMR}$  (400 MHz,  $\text{CDCl}_3$ ):  $\delta$  = 7.91 (d,  $J$  = 8.4 Hz, 2 H, Ar-H), 7.47 (d,  $J$  = 8.4 Hz, 2 H, Ar-H), 5.79 (quint,  $J$  = 2.6 Hz, 1 H, CH), 2.59 (s, 3 H,  $\text{CH}_3$ ), 2.55-2.41 (m, 2 H,  $\text{CH}_2$ ), 2.32 (td,  $J_1$  = 7.1 Hz,  $J_2$  = 2.4 Hz, 2 H,  $\text{CH}_2$ ), 1.60-1.48 (m, 4 H, 2 x  $\text{CH}_2$ ), 1.48-1.36 (m, 4 H, 2 x  $\text{CH}_2$ ), 1.00-0.88 (m, 6 H, 2 x  $\text{CH}_3$ );  $^{13}\text{C NMR}$  (100 MHz,  $\text{CDCl}_3$ ):  $\delta$  = 214.0, 197.5, 140.8, 135.6, 128.5, 126.4, 107.3, 92.0, 79.7, 72.1, 30.7, 29.7, 29.4, 26.5, 22.3, 22.0, 19.3, 13.9, 13.6.

## Gram scale reactions and transformations

### (1) Synthesis of 9-(3-methoxyphenyl)trideca-7,8-dien-5-yne (**3aa**, wj-3-100)

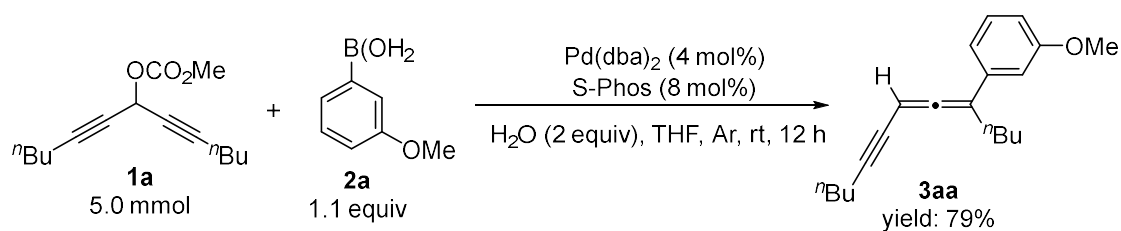

Following **Typical Procedure IV**, the reaction of 3-methoxyphenylboronic acid **2a** (836.0 mg, 5.5 mmol),  $\text{Pd}(\text{dba})_2$  (114.9 mg, 0.2 mmol), S-phos (164.1 mg, 0.4 mmol), methyl carbonate **1a** (1.2513 g, 5.0 mmol)/THF (25 mL), and  $\text{H}_2\text{O}$  (10 mmol, 180  $\mu\text{L}$ ) afforded the product **3aa** (1.1137 g, 79%) [eluent: petroleum ether / dichloromethane = 5:1 (480 mL)]; oil;  $^1\text{H NMR}$  (400 MHz,  $\text{CDCl}_3$ ):  $\delta$  = 7.24 (t,  $J$  = 8.0 Hz, 1 H, Ar-H), 6.99 (d,  $J$  = 7.6 Hz, 1 H, Ar-H), 6.94 (s, 1 H, Ar-H), 6.83-6.72 (m, 1 H, Ar-H), 5.71 (s,

1 H, CH), 3.81 (s, 3 H, CH<sub>3</sub>), 2.52-2.37 (m, 2 H, CH<sub>2</sub>), 2.30 (t, *J* = 6.8 Hz, 2 H, CH<sub>2</sub>), 1.62-1.47 (m, 4 H, 2 x CH<sub>2</sub>), 1.47-1.35 (m, 4 H, 2 x CH<sub>2</sub>), 1.00-0.84 (m, 6 H, 2 x CH<sub>3</sub>); <sup>13</sup>C NMR (100 MHz, CDCl<sub>3</sub>): δ = 213.1, 159.7, 137.3, 129.3, 119.0, 112.37, 112.35, 107.6, 91.1, 79.0, 72.8, 55.2, 30.8, 29.8, 29.7, 22.4, 22.0, 19.3, 13.9, 13.6.

## (2) Synthesis of 9-(2-methoxyphenyl)trideca-7,8-dien-5-yne (3ae, wj-5-095)

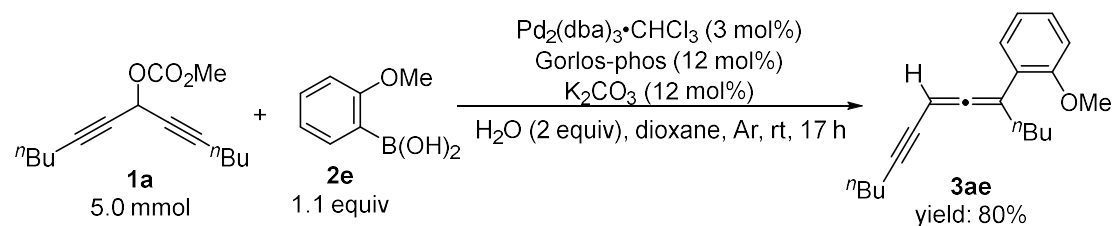

Following **Typical Procedure V**, the reaction of 2-methoxyphenylboronic acid (835.9 mg, 5.5 mmol), Pd<sub>2</sub>(dba)<sub>3</sub>·CHCl<sub>3</sub> (155.4 mg, 0.15 mmol), Gorlos-phos (287.1 mg, 0.6 mmol), K<sub>2</sub>CO<sub>3</sub> (82.8 mg, 0.6 mmol), methyl carbonate **1a** (1.2517 g, 5.0 mmol)/dioxane (25.0 mL), and H<sub>2</sub>O (10.0 mmol, 180 μL) afforded the product **3ae** (1.1289 g, 80%) [eluent: petroleum ether / dichloromethane = 10:1 (770 mL)]; oil; <sup>1</sup>H NMR (400 MHz, CDCl<sub>3</sub>): δ = 7.28-7.18 (m, 2 H, Ar-H), 6.92 (t, *J* = 7.6 Hz, 1 H, CH), 6.87 (d, *J* = 8.4 Hz, 1 H, Ar-H), 5.48 (quint, *J* = 2.5 Hz, 1 H, CH), 3.82 (s, 3 H, CH<sub>3</sub>), 2.44 (td, *J*<sub>1</sub> = 7.8 Hz, *J*<sub>2</sub> = 2.8 Hz, 2 H, CH<sub>2</sub>), 2.31 (td, *J*<sub>1</sub> = 6.9 Hz, *J*<sub>2</sub> = 2.4 Hz, 2 H, CH<sub>2</sub>), 1.58-1.30 (m, 8 H, 4 x CH<sub>2</sub>), 0.96-0.84 (m, 6 H, 2 x CH<sub>3</sub>); <sup>13</sup>C NMR (100 MHz, CDCl<sub>3</sub>): δ = 212.6, 156.9, 129.6, 128.5, 125.9, 120.6, 111.3, 105.1, 90.4, 75.7, 73.7, 55.6, 31.8, 30.9, 29.8, 22.3, 22.0, 19.3, 13.9, 13.6.

## (3) Synthesis of 7-phenylnona-5,6-dien-3-yn-1,9-diyl di(*tert*-butyldimethylsilyl) ether (3gb, wj-3-138)

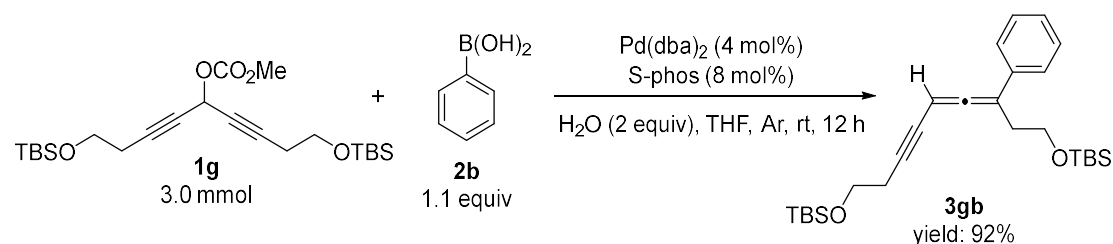

Following **Typical Procedure IV**, the reaction of phenylboronic acid **2b** (402.2 mg, 3.3 mmol), Pd(dba)<sub>2</sub> (69.0 mg, 0.12 mmol), S-phos (98.6 mg, 0.24 mmol), methyl carbonate (1.3647 g, 3.0 mmol)/THF (15.0 mL), and H<sub>2</sub>O (6.0 mmol, 108 μL) afforded the product **3gb** (1.2604 g, 92%) [eluent: petroleum ether / ethyl ether / dichloromethane = 100:1:1 (900 mL)]; oil; <sup>1</sup>H NMR (400 MHz, CDCl<sub>3</sub>): δ = 7.38 (d, *J* = 7.6 Hz, 2 H, Ar-H), 7.32 (t, *J* = 7.6 Hz, 2 H, Ar-H), 7.22 (t, *J* = 7.2 Hz, 1 H, Ar-H), 5.70 (s, 1 H, CH), 3.81 (t, *J* = 7.0 Hz, 2 H, CH<sub>2</sub>), 3.74 (t, *J* = 7.0 Hz, 2 H, CH<sub>2</sub>), 2.75-2.65 (m, 2 H, CH<sub>2</sub>), 2.52 (t, *J* = 7.0 Hz, 2 H, CH<sub>2</sub>), 0.89 (s, 18 H, 6 x CH<sub>3</sub>), 0.07 (s, 6 H, 2 x CH<sub>3</sub>), 0.04 (s, 6 H, 2 x CH<sub>3</sub>); <sup>13</sup>C NMR (100 MHz, CDCl<sub>3</sub>): δ = 213.4, 135.2, 128.4, 127.3, 126.4, 104.7, 88.1, 78.8, 73.9, 61.9, 61.7, 33.3, 25.91, 25.88, 24.0, 18.32, 18.27, -5.28, -5.31.

**(4) Synthesis of 7-phenylnona-5,6-dien-3-yne-1,9-diol (**4**, wj-3-139)<sup>3</sup>**

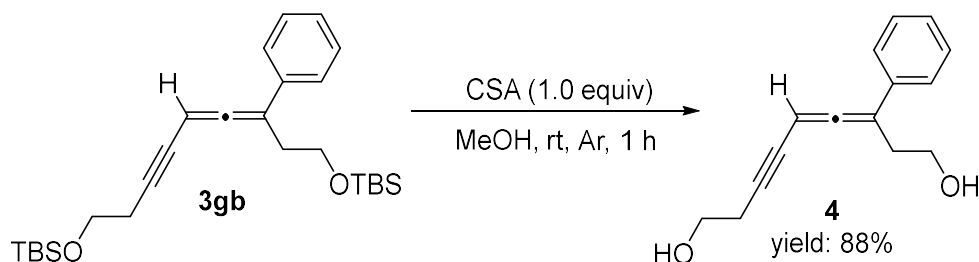

To a dried Schlenk tube were added **3gb** (685.4 mg, 1.5 mmol) and MeOH (7.5 mL) under Ar atmosphere. Then 10-camphorsulfonic acid (348.4 mg, 1.5 mmol) was added and the resulting mixture was stirred at room temperature for 1 h as monitored by TLC, diluted with Et<sub>2</sub>O (3 mL), quenched with saturated NaHCO<sub>3</sub> (5 mL), extracted with Et<sub>2</sub>O (3 x 5 mL), washed with brine, dried over Na<sub>2</sub>SO<sub>4</sub>, filtered, and concentrated. The resulting residue was purified by column chromatography on silica gel to afford the product diol **4** (0.3021 g, 88%) [eluent: petroleum ether / ethyl acetate = 1:1 (600 mL)]; oil; <sup>1</sup>H NMR (400 MHz, CDCl<sub>3</sub>): δ = 7.44-7.30 (m, 4 H, Ar-H), 7.30-7.20 (m, 1 H, Ar-H), 5.79 (s, 1 H, CH), 3.87 (t, *J* = 6.0 Hz, 2 H, CH<sub>2</sub>), 3.73 (t, *J* = 6.0 Hz, 2 H, CH<sub>2</sub>), 2.85-2.66 (m, 2 H, CH<sub>2</sub>), 2.63-2.50 (m, 2 H, CH<sub>2</sub>), 2.10-1.65 (m, 2 H, 2 x OH); <sup>13</sup>C NMR (100 MHz, CDCl<sub>3</sub>): δ = 213.1, 134.6, 128.6, 127.6, 126.4, 104.9, 88.2, 79.4, 74.4,

61.0, 60.8, 33.1, 23.9; **IR** (neat):  $\nu = 3320, 2957, 2884, 2217, 1938, 1597, 1493, 1448, 1420, 1329, 1185, 1036 \text{ cm}^{-1}$ ; **MS** (70 eV, EI)  $m/z$ : 228 ( $M^+$ , 24.08), 152 (100); **HRMS** (EI) calcd for  $C_{15}H_{16}O_2$  [ $M^+$ ]: 228.1145, found: 228.1146.

**(5) Synthesis of 7-phenylnona-5,6-dien-3-yne-1,9-diyl diacetate (5, wj-3-157)**

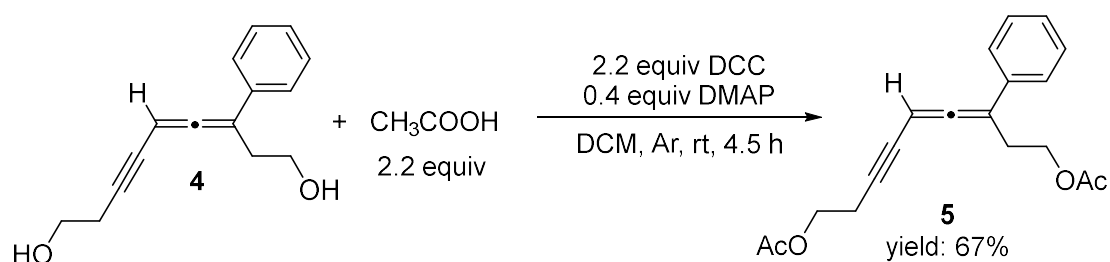

To a dried Schlenk tube were added DCC (91.0 mg, 0.44 mmol), DMAP (9.9 mg, 0.08 mol). Then the Schlenk tube was degassed and refilled with Ar for three times. Acetic acid (25  $\mu\text{L}$ ,  $d = 1.049 \text{ g/mL}$ , 26.2 mg, 0.44 mmol) and diol **4** (45.5 mg, 0.2 mmol) in DCM (1.5 mL) were added sequentially. The resulting mixture was stirred at room temperature for 4.5 h as monitored by TLC, concentrated, diluted with cold ethyl acetate (10 mL), filtered through a short column silica gel (3 cm) eluted with cold ethyl acetate (10 mL), and concentrated. The resulting residue was purified by column chromatography on silica gel to afford the product **5** (41.5 mg, 67%) [eluent: petroleum ether / ethyl acetate = 6:1 (150 mL)]; oil;  **$^1\text{H NMR}$**  (400 MHz,  $CDCl_3$ ):  $\delta = 7.44\text{-}7.29$  (m, 4 H, Ar-H), 7.29-7.22 (m, 1 H, Ar-H), 5.76 (s, 1 H, CH), 4.34-4.22 (m, 2 H,  $CH_2$ ), 4.17 (t,  $J = 6.8 \text{ Hz}$ , 2 H,  $CH_2$ ), 2.90-2.72 (m, 2 H,  $CH_2$ ), 2.65 (t,  $J = 6.4 \text{ Hz}$ , 2 H,  $CH_2$ ), 2.13-1.98 (m, 6 H, 2 x  $CH_3$ );  **$^{13}\text{C NMR}$**  (100 MHz,  $CDCl_3$ ):  $\delta = 213.1, 171.0, 170.7, 134.5, 128.6, 127.6, 126.3, 104.3, 86.9, 79.6, 74.1, 62.4, 62.2, 29.0, 20.9, 20.8, 20.0$ ; **IR** (neat):  $\nu = 2966, 2222, 1938, 1735, 1494, 1451, 1384, 1364, 1230, 1037 \text{ cm}^{-1}$ ; **MS** (ESI)  $m/z$ : 335 ( $M+Na^+$ ); **HRMS** (ESI) calcd for  $C_{19}H_{20}O_4Na$  [ $M+Na^+$ ]: 335.1254, found: 335.1249.

**(6) Synthesis of (Z)-4-iodo-1,9-di((tert-butyl)dimethylsilyloxy)-3-phenylnon-4-en-6-yn-3-ol (6, wj-4-017)<sup>4</sup>**

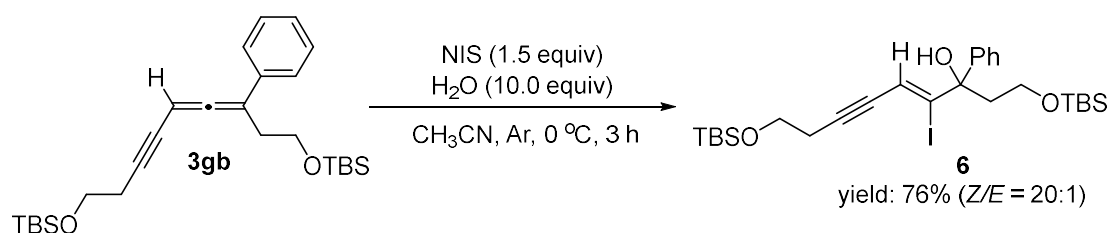

To a Schleck tube were added **3gb** (91.5 mg, 0.2 mmol) and CH<sub>3</sub>CN (2 mL) under Ar atmosphere. The resulting mixture was cooled to 0 °C via an ice-water bath followed by the sequential addition of NIS (69.0 mg, 0.3 mmol) and H<sub>2</sub>O (36 μL, 2.0 mmol), stirred for 3 h as monitored by TLC, quenched with saturated sodium thiosulfate (2 mL), extracted with ethyl acetate (5 mL x 3), washed with brine, dried over Na<sub>2</sub>SO<sub>4</sub>, filtered, and concentrated. The resulting residue was purified by column chromatography on silica gel to afford the product **6** (91.5 mg, 76%, *Z/E* = 20:1) [eluent: petroleum ether / ethyl ether / dichloromethane = 50:1:1 (400 mL)]; oil; <sup>1</sup>H NMR (400 MHz, CDCl<sub>3</sub>): δ = 7.43 (d, *J* = 7.6 Hz, 2 H, Ar-H), 7.33 (t, *J* = 7.4 Hz, 2 H, Ar-H), 7.29-7.23 (m, 1 H, Ar-H), 6.73 (s, 1 H, CH), 5.50 (s, 1 H, OH), 3.94-3.74 (m, 4 H, 2 x CH<sub>2</sub>), 2.70-2.62 (m, 1 H, one proton of CH<sub>2</sub>), 2.59 (t, *J* = 7.0 Hz, 2 H, CH<sub>2</sub>), 2.39-2.27 (m, 1 H, one proton of CH<sub>2</sub>), 0.92-0.85 (m, 18 H, 6 x CH<sub>3</sub>), 0.10-0.02 (m, 12 H, 4 x CH<sub>3</sub>); <sup>13</sup>C NMR (100 MHz, CDCl<sub>3</sub>): 143.4, 128.1, 127.5, 126.2, 126.1, 118.4, 93.6, 82.4, 81.3, 61.7, 61.0, 38.7, 25.9, 25.7, 24.2, 18.3, 18.0, -5.2, -5.7, -5.8; IR (neat): ν = 3414, 2953, 2931, 2881, 2857, 2219, 1469, 1388, 1254, 1095, 1044 cm<sup>-1</sup>; MS (ESI) *m/z* (%): 623 (M+Na<sup>+</sup>); HRMS (ESI) calcd for C<sub>27</sub>H<sub>45</sub>O<sub>3</sub>INaSi<sub>2</sub> [M+Na<sup>+</sup>]: 623.1844, found: 623.1837.

#### Preliminary attempt on the non-symmetric 1,4-diyne-3-yl carbonate **1i** (wj-7-142)

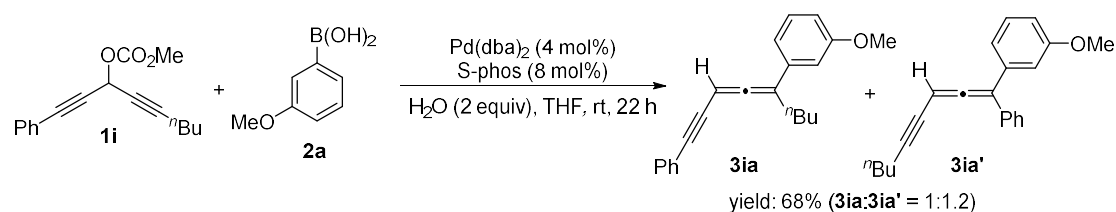

Following **Typical Procedure IV**, the reaction of 3-methoxyphenylboronic acid **2a** (33.5 mg, 0.22 mmol), Pd(dba)<sub>2</sub> (4.6 mg, 0.008 mmol), S-phos (6.6 mg, 0.016 mmol), methyl carbonate **1i** (53.9 mg, 0.2 mmol)/THF (1 mL), and H<sub>2</sub>O (0.4 mmol, 7.2 μL)

afforded the product (41.1 mg, 68% (**3ia**:**3ia'** = 1:1.2)) [eluent: petroleum ether / dichloromethane = 20:1 (210 mL) to 10:1 (150 mL)]; oil; 32% NMR yield of **3ia** and 40% of **3ia'** (1:1.3) based on <sup>1</sup>H NMR analysis of the crude product.

## References:

1. Sawada, Y.; Furumi, S.; Takai, A.; Takeuchi, M.; Noguchi, K.; Tanaka, K. Rhodium-Catalyzed Enantioselective Synthesis, Crystal Structures, and Photophysical Properties of Helically Chiral 1,1'-Bitriphenylenes. *J. Am. Chem. Soc.* **2012**, *134*, 4080-4083.
2. Wu, P.; Jia, M.; Lin, W.; Ma, S. Matched Coupling of Propargylic Carbonates with Cyclopropanols. *Org. Lett.* **2018**, *20*, 554-557.
3. Umemiya, S.; Terada, M. Catalytic Enantioselective Allylation of Acetylenic Aldehydes by Chiral Phosphoric Acid/Transition Metal Cooperative Catalysis: Formal Synthesis of Fostriecin. *Org. Lett.* **2021**, *23*, 3767-3771.
4. Kong, W.; Guo, B.; Fu, C.; Ma, S. An Efficient Approach to 2-Bromoalken-3-ols by Regioselective Bromohydroxylation Reaction of Simple Allenes with NBS. *Eur. J. Org. Chem.* **2011**, 2278-2285.



wj-3-103-H  
May 12 2021  
SOLVENT: CDCl3  
NA = 4  
F1 = 400.130005 MHz  
F2 = 1.000000 MHz

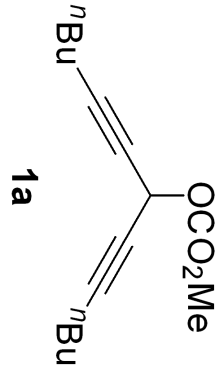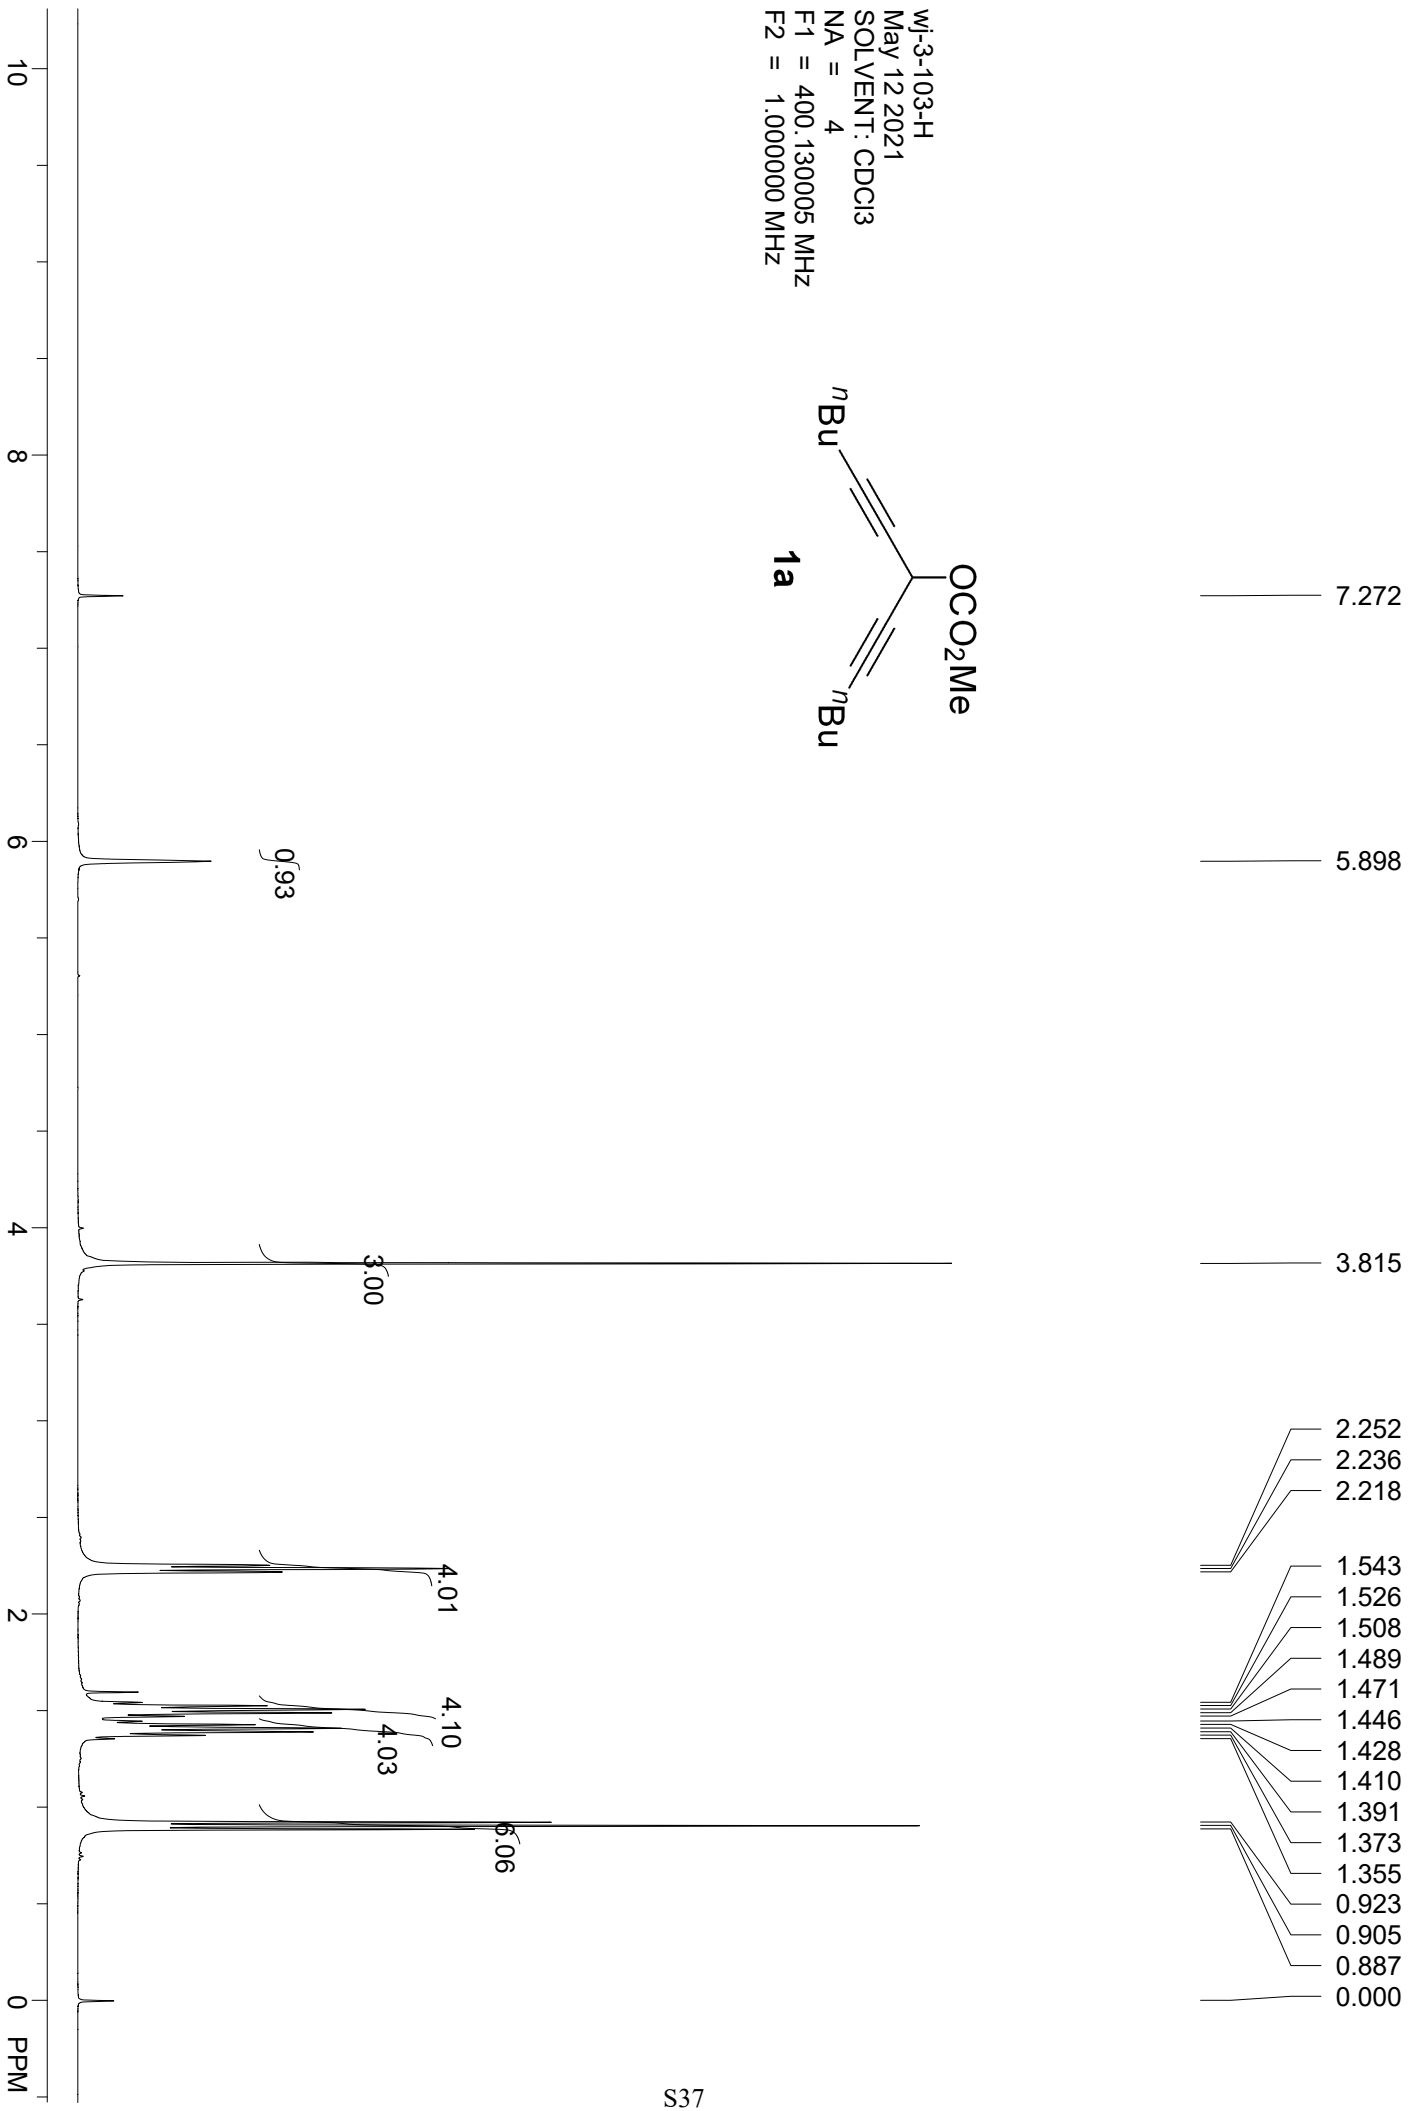

wj-3-103-C  
May 12 2021  
SOLVENT: CDCl3  
NA = 250  
F1 = 100.612770 MHz  
F2 = 1.000000 MHz

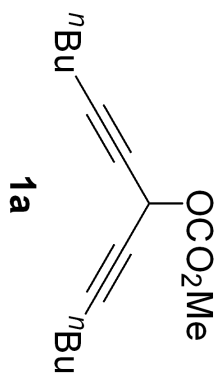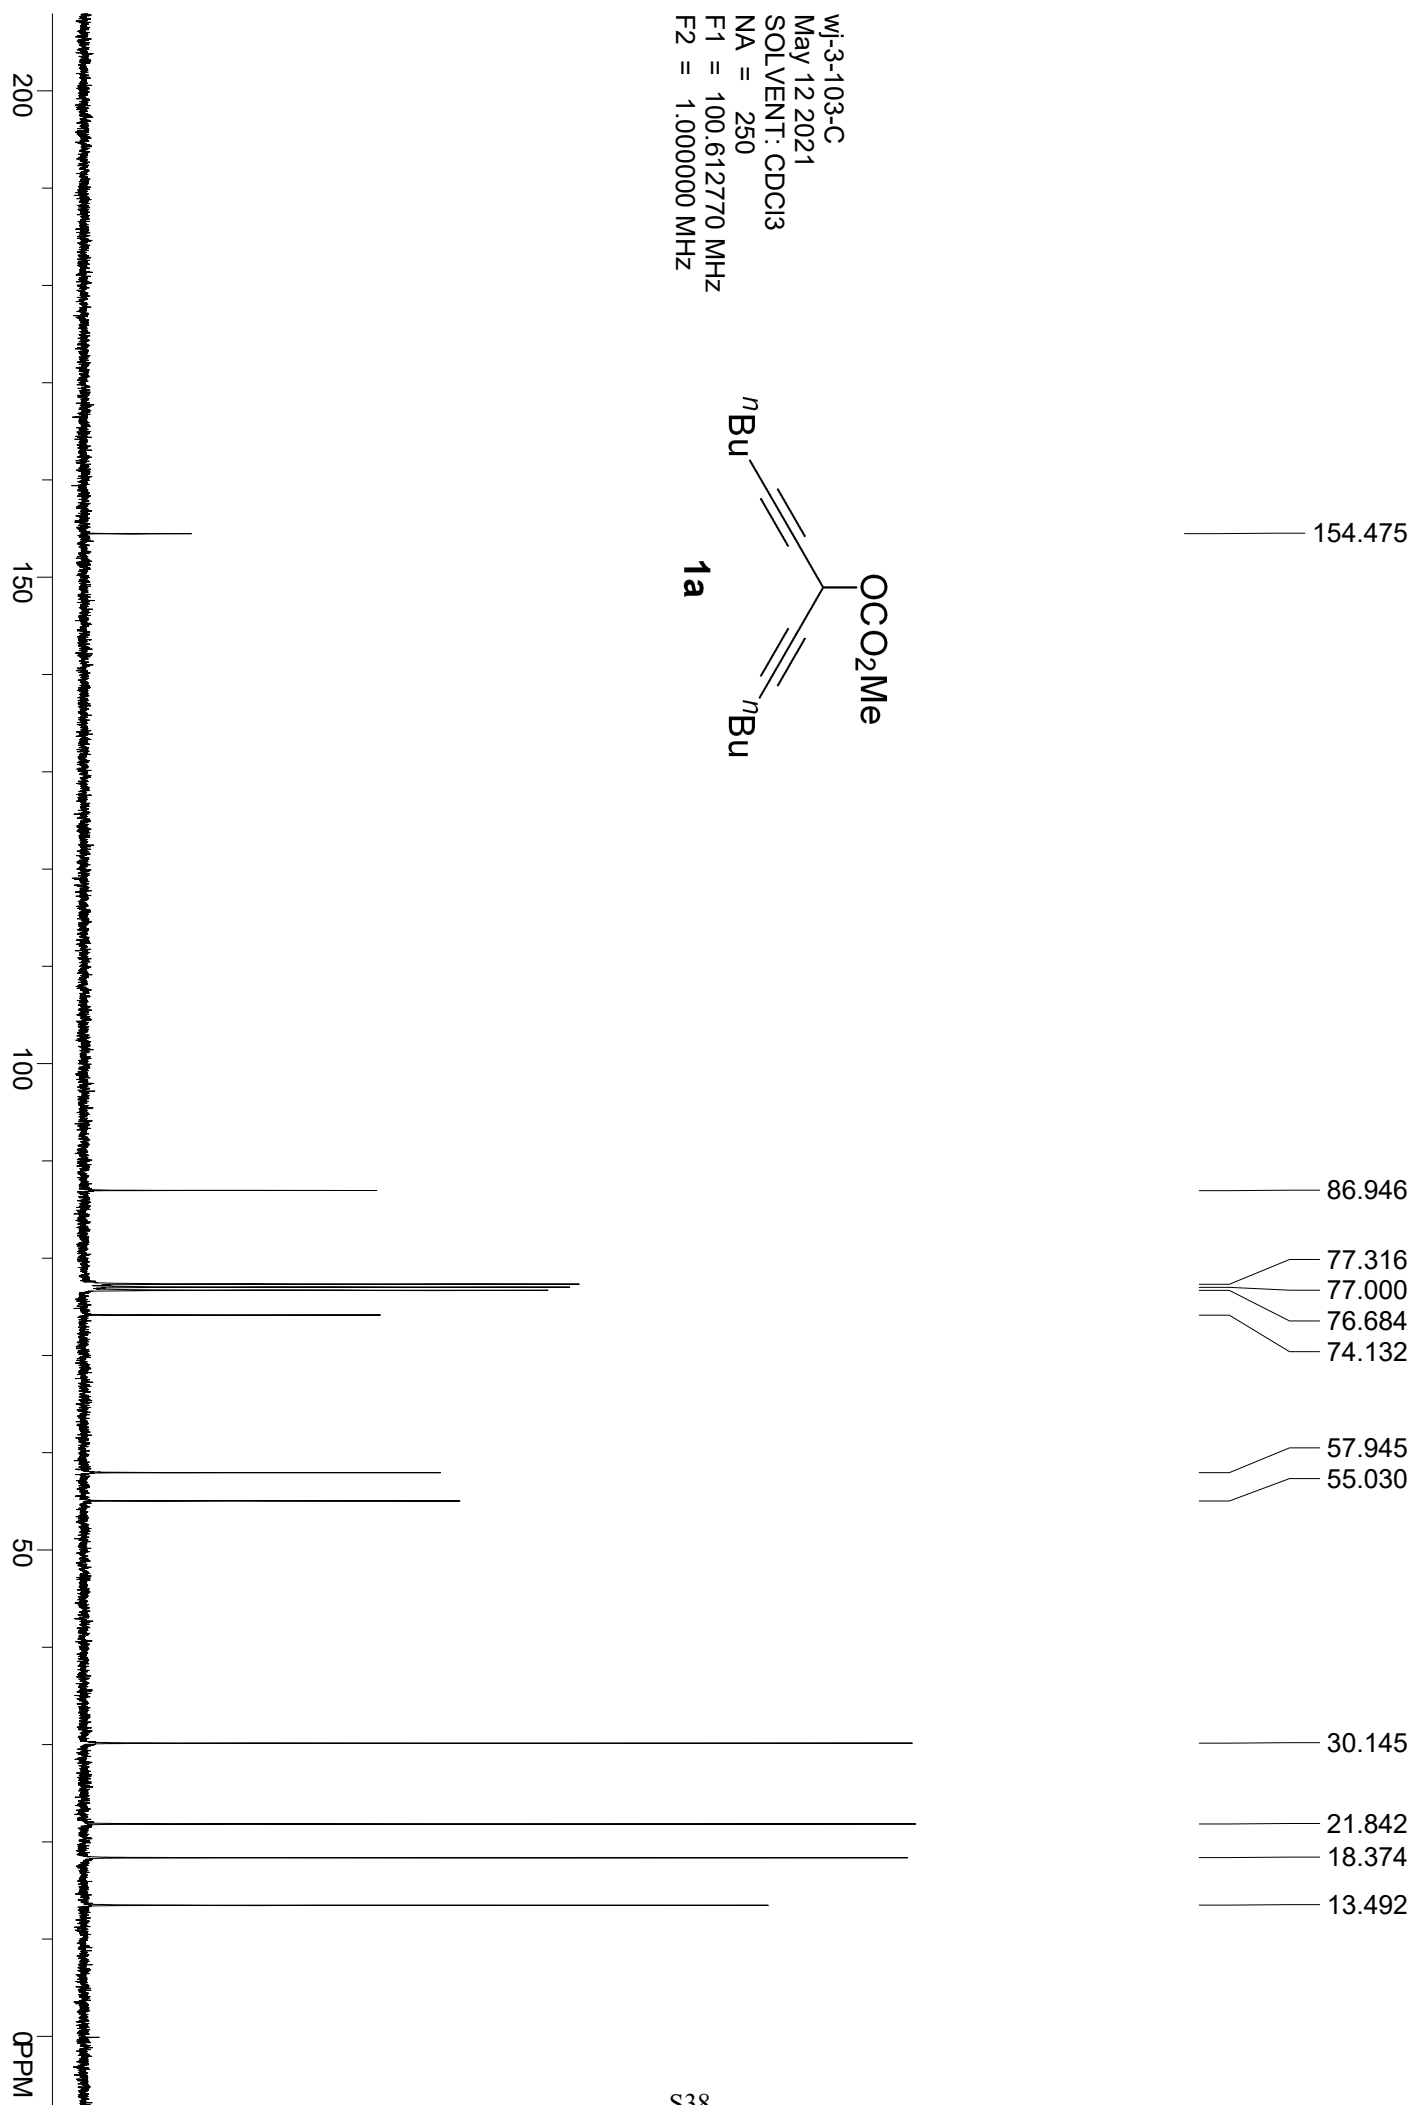

wf-3-104-H  
May 12 2021  
SOLVENT: CDCl3  
NA = 4  
F1 = 400.130005 MHz  
F2 = 1.000000 MHz

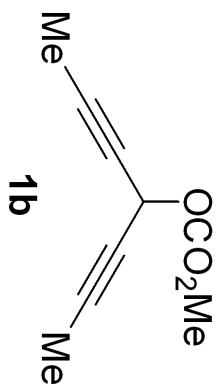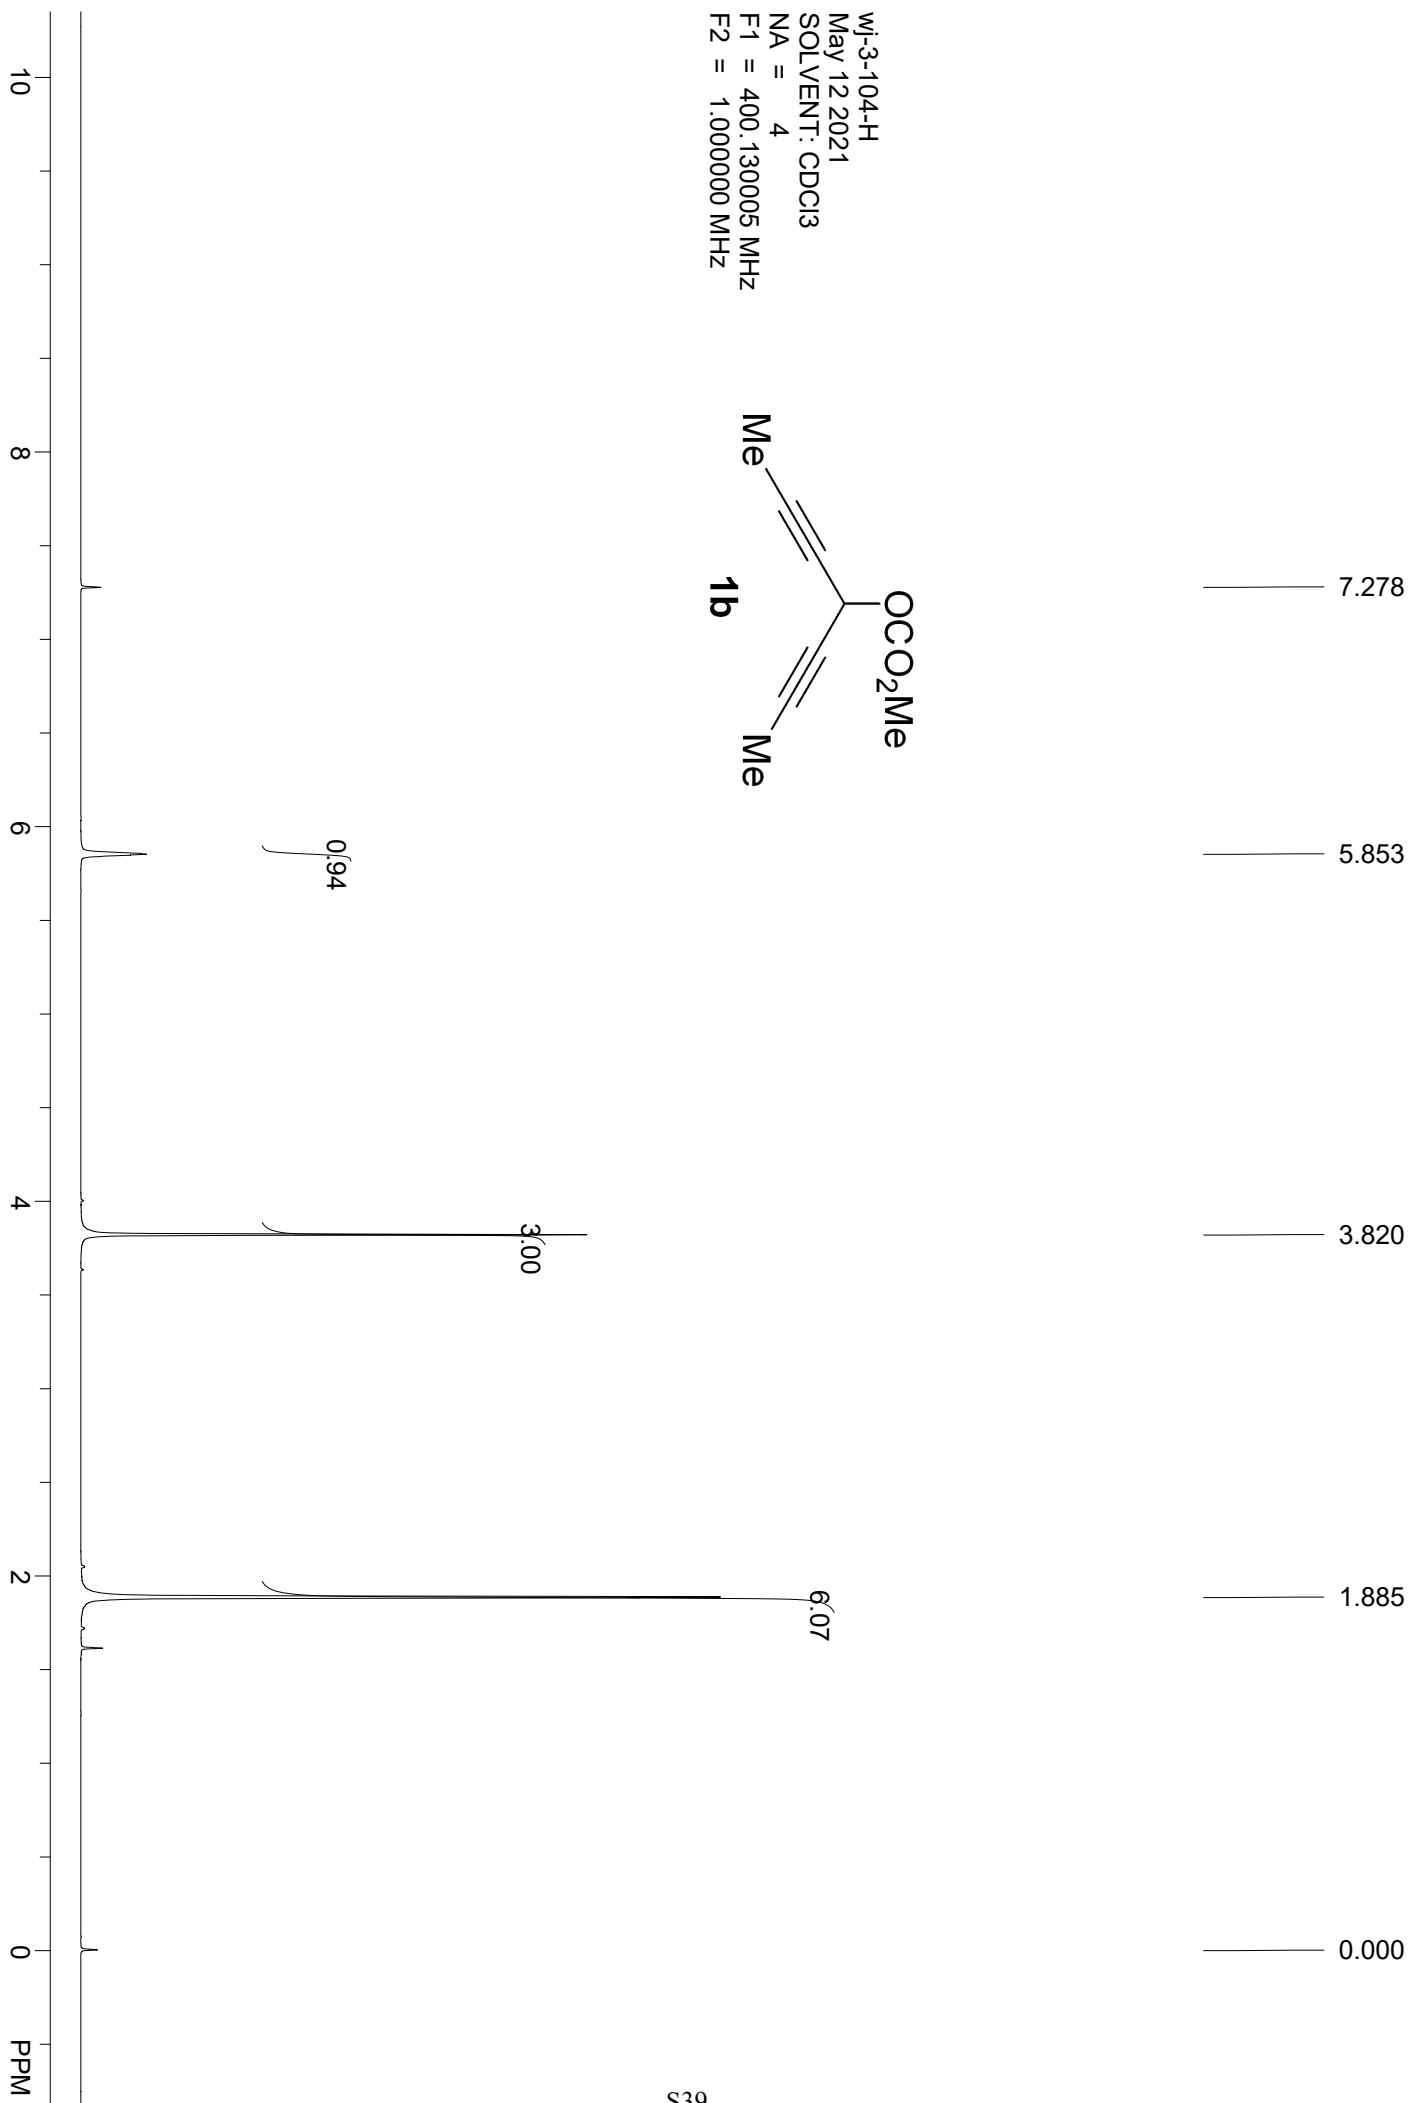

wj-3-104-C  
May 12 2021  
SOLVENT: CDCl3  
NA = 250  
F1 = 100.612770 MHz  
F2 = 1.000000 MHz

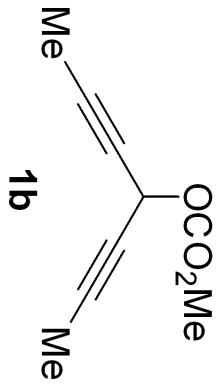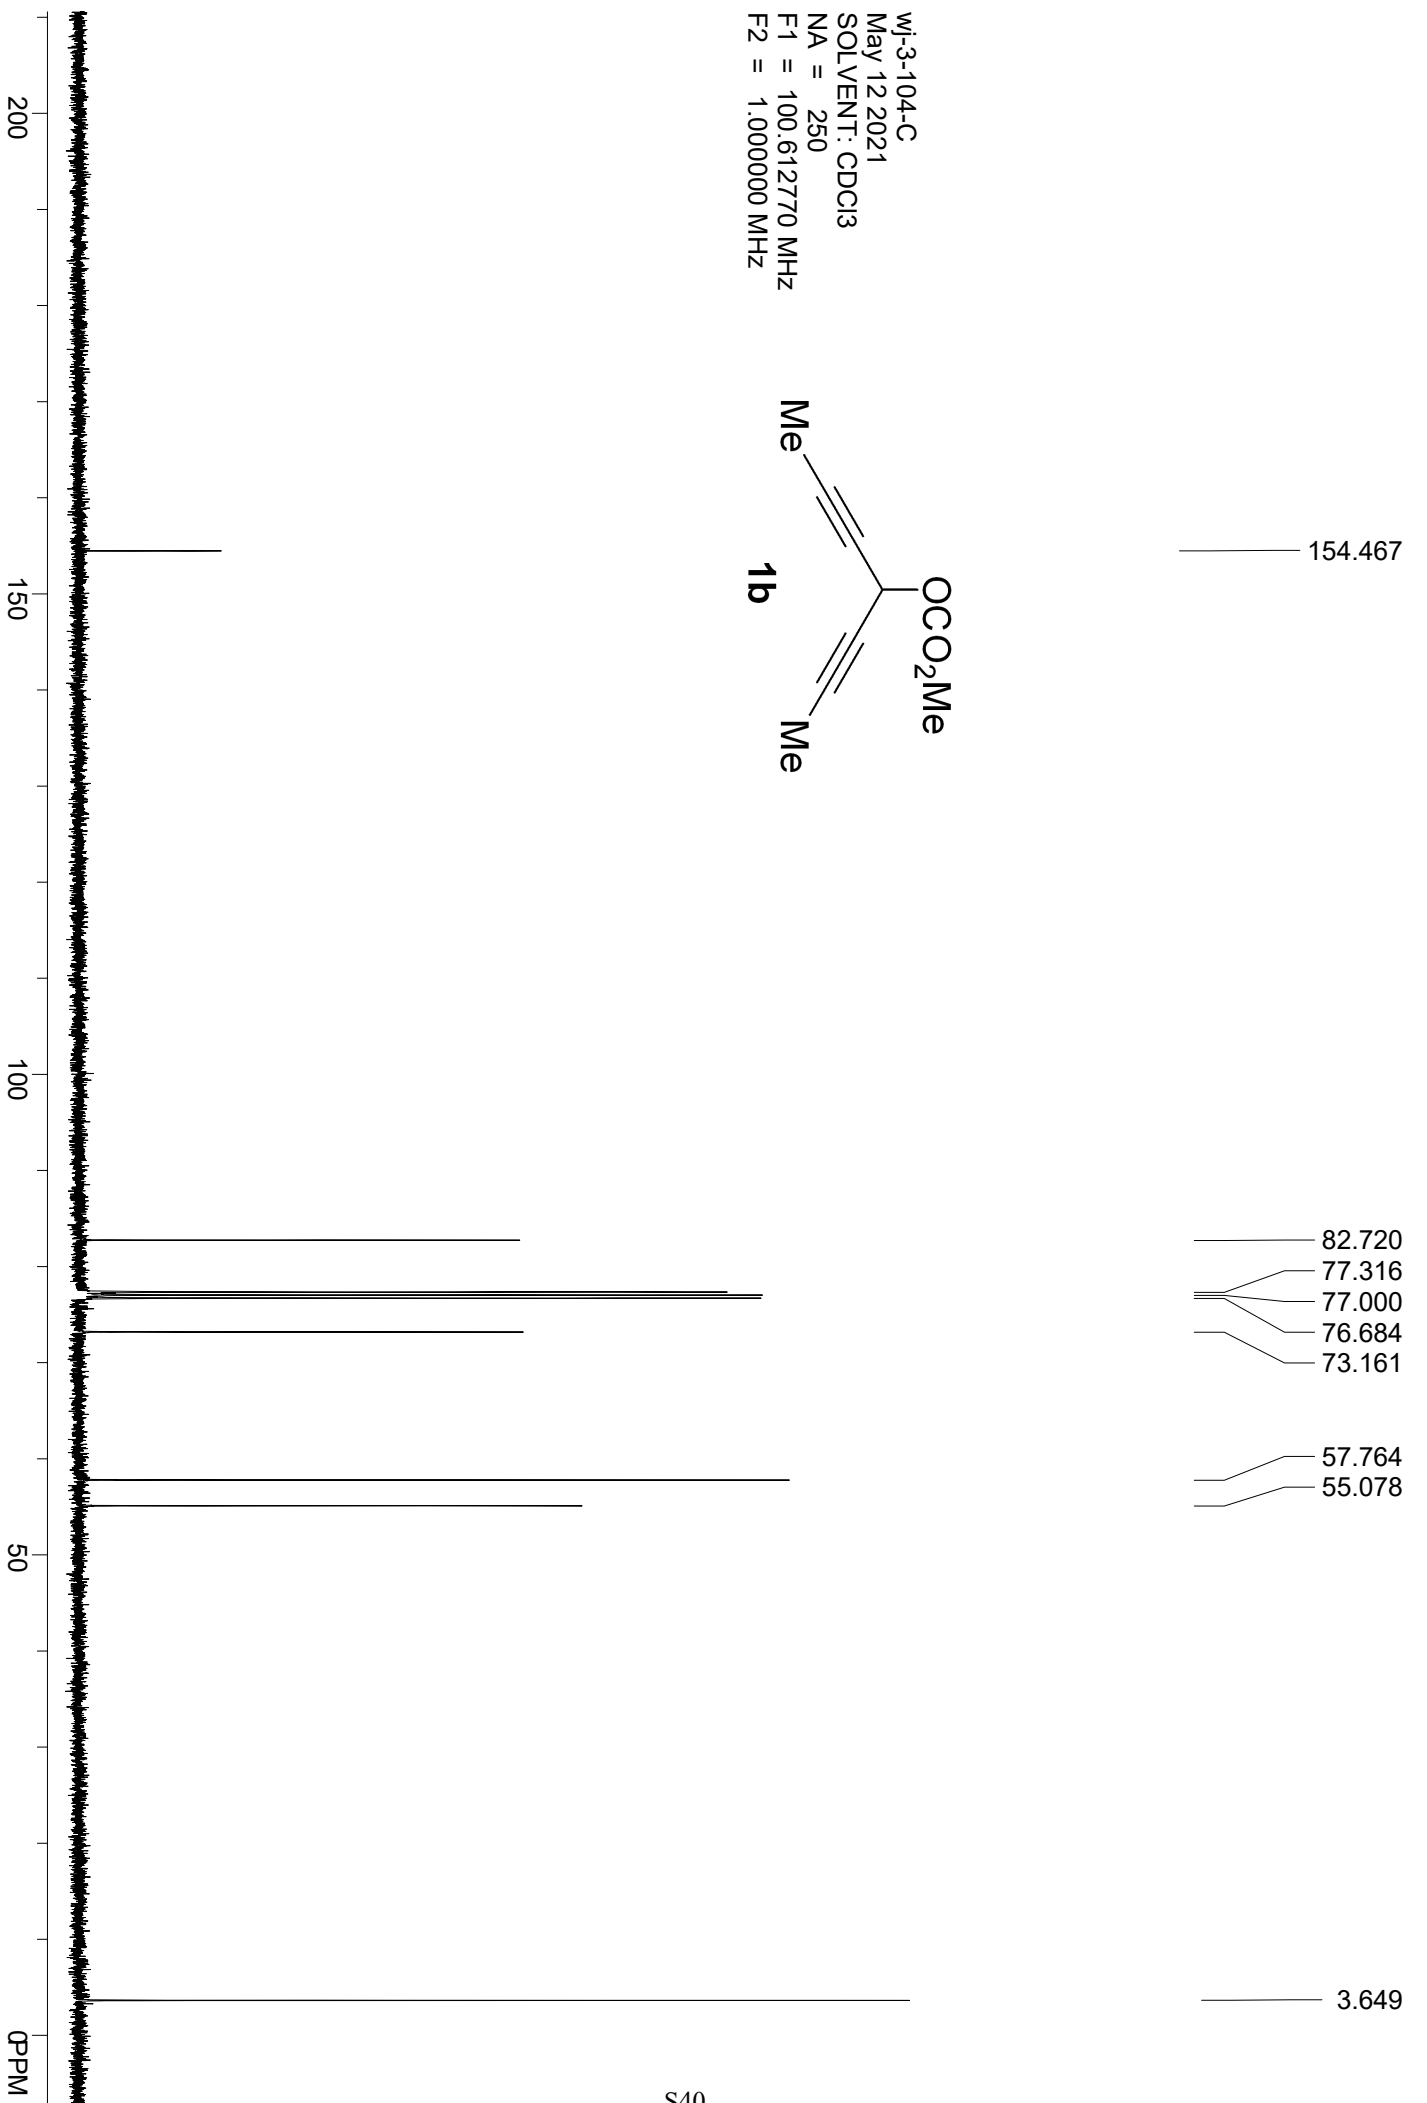

wj-3-081-H  
Apr 27 2021  
SOLVENT: CDCl3  
NA = 4  
F1 = 400.130005 MHz  
F2 = 1.000000 MHz

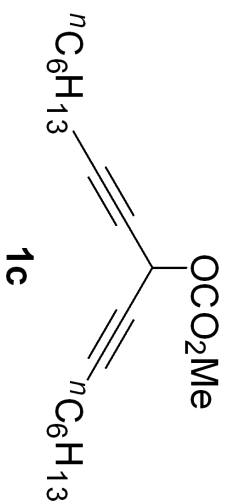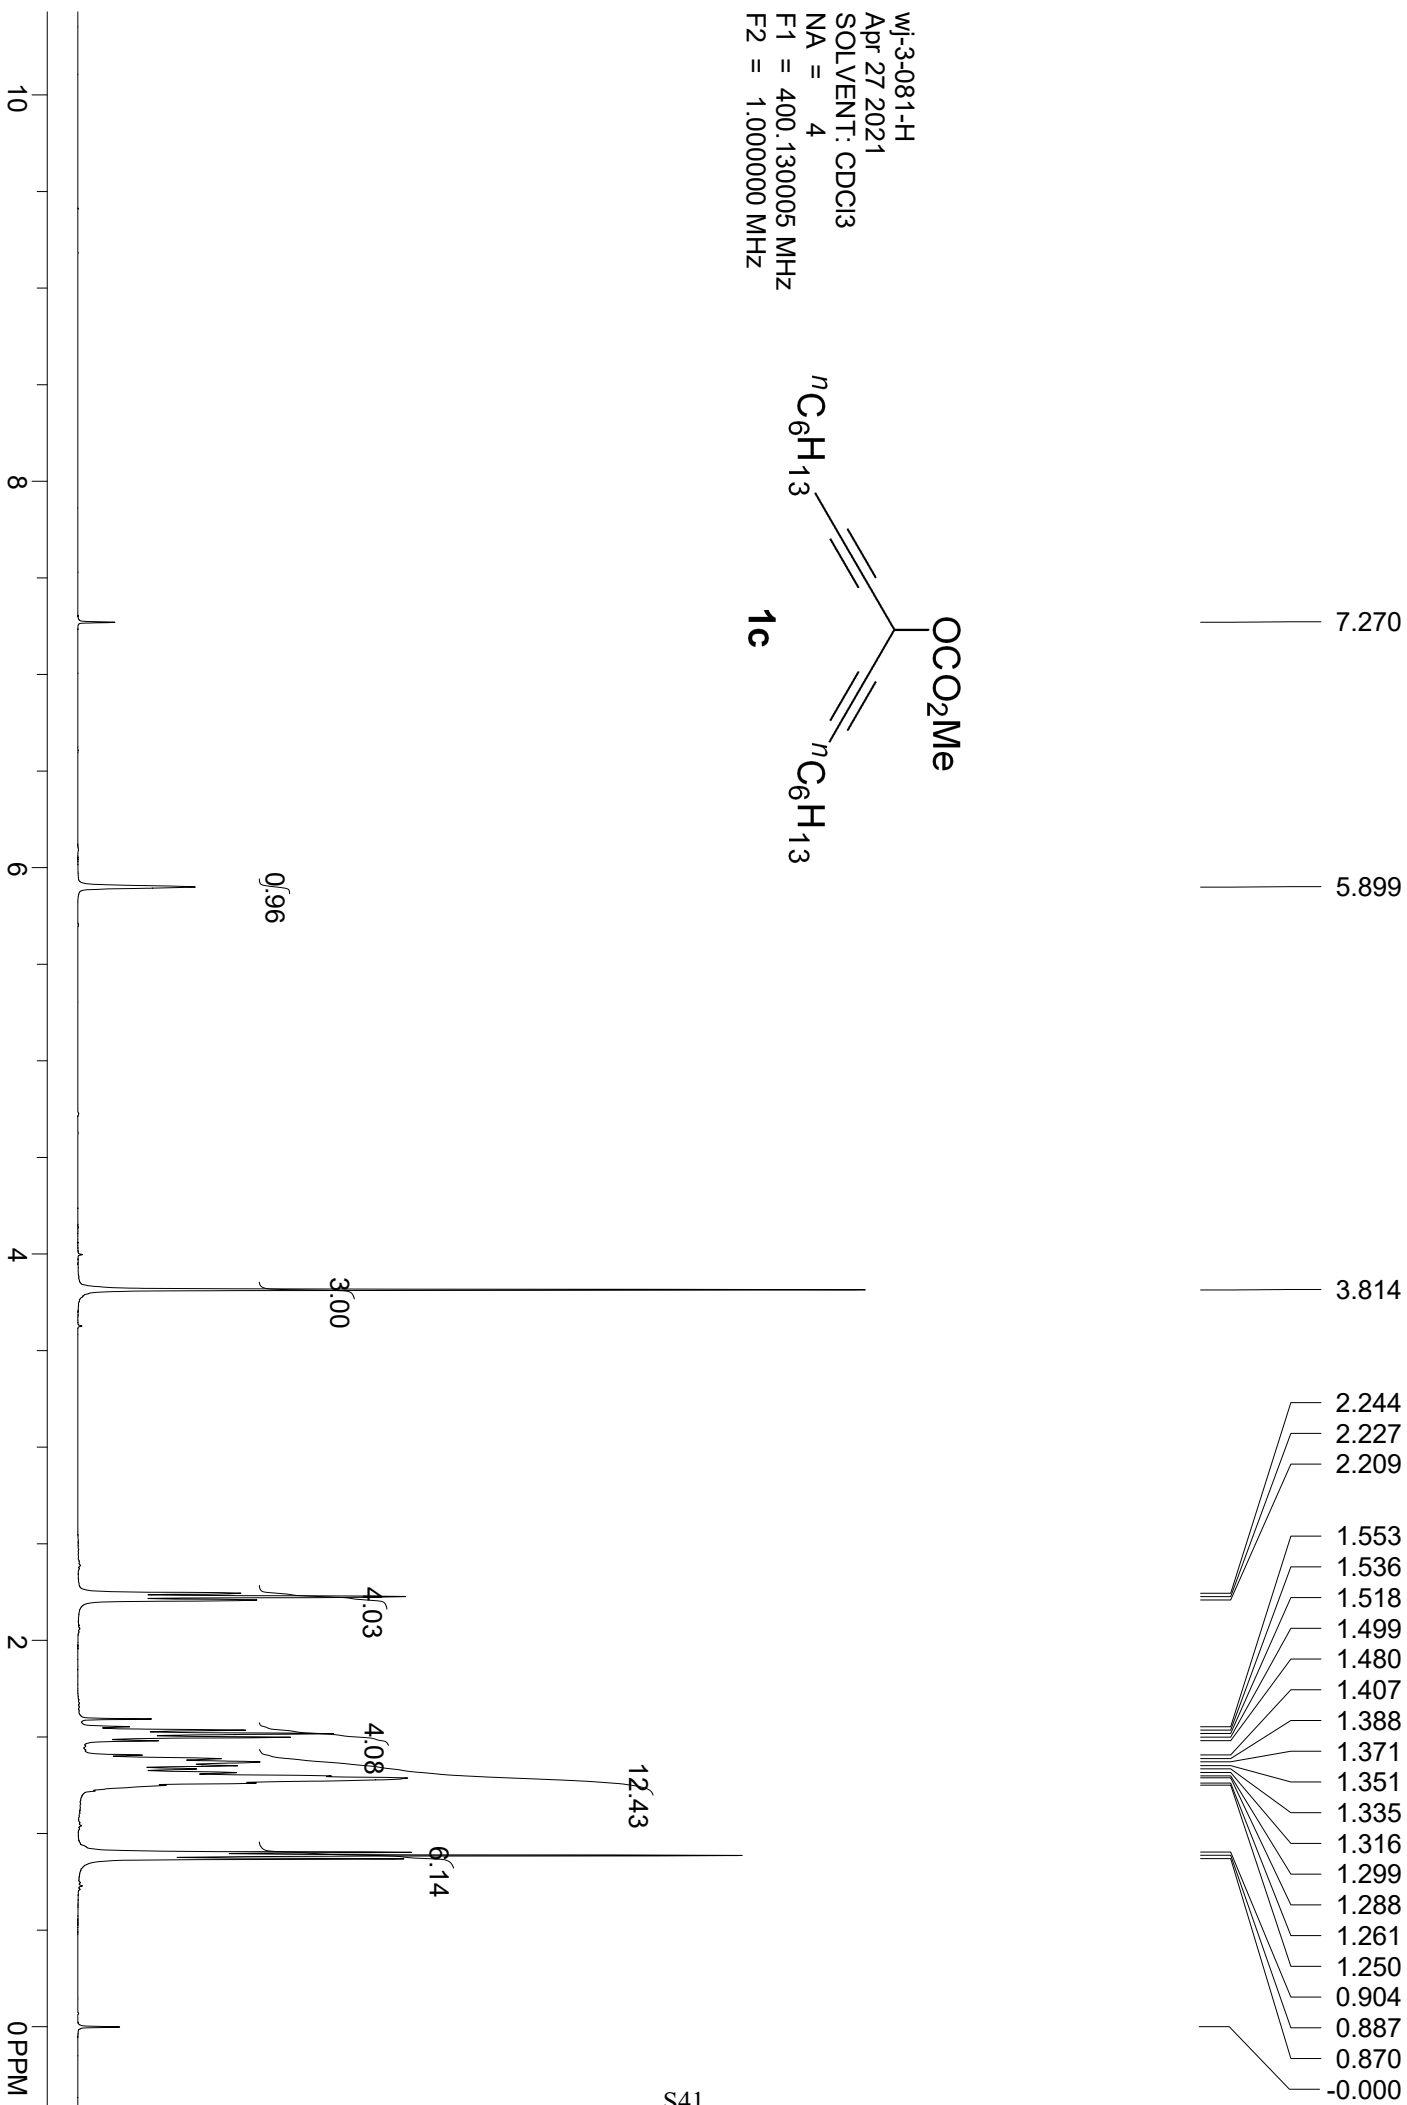

wj-3-081-C  
Apr 27 2021  
SOLVENT: CDCl3  
NA = 250  
F1 = 100.612770 MHz  
F2 = 1.000000 MHz

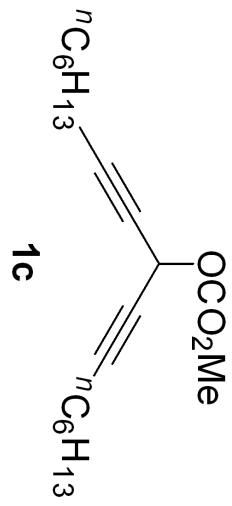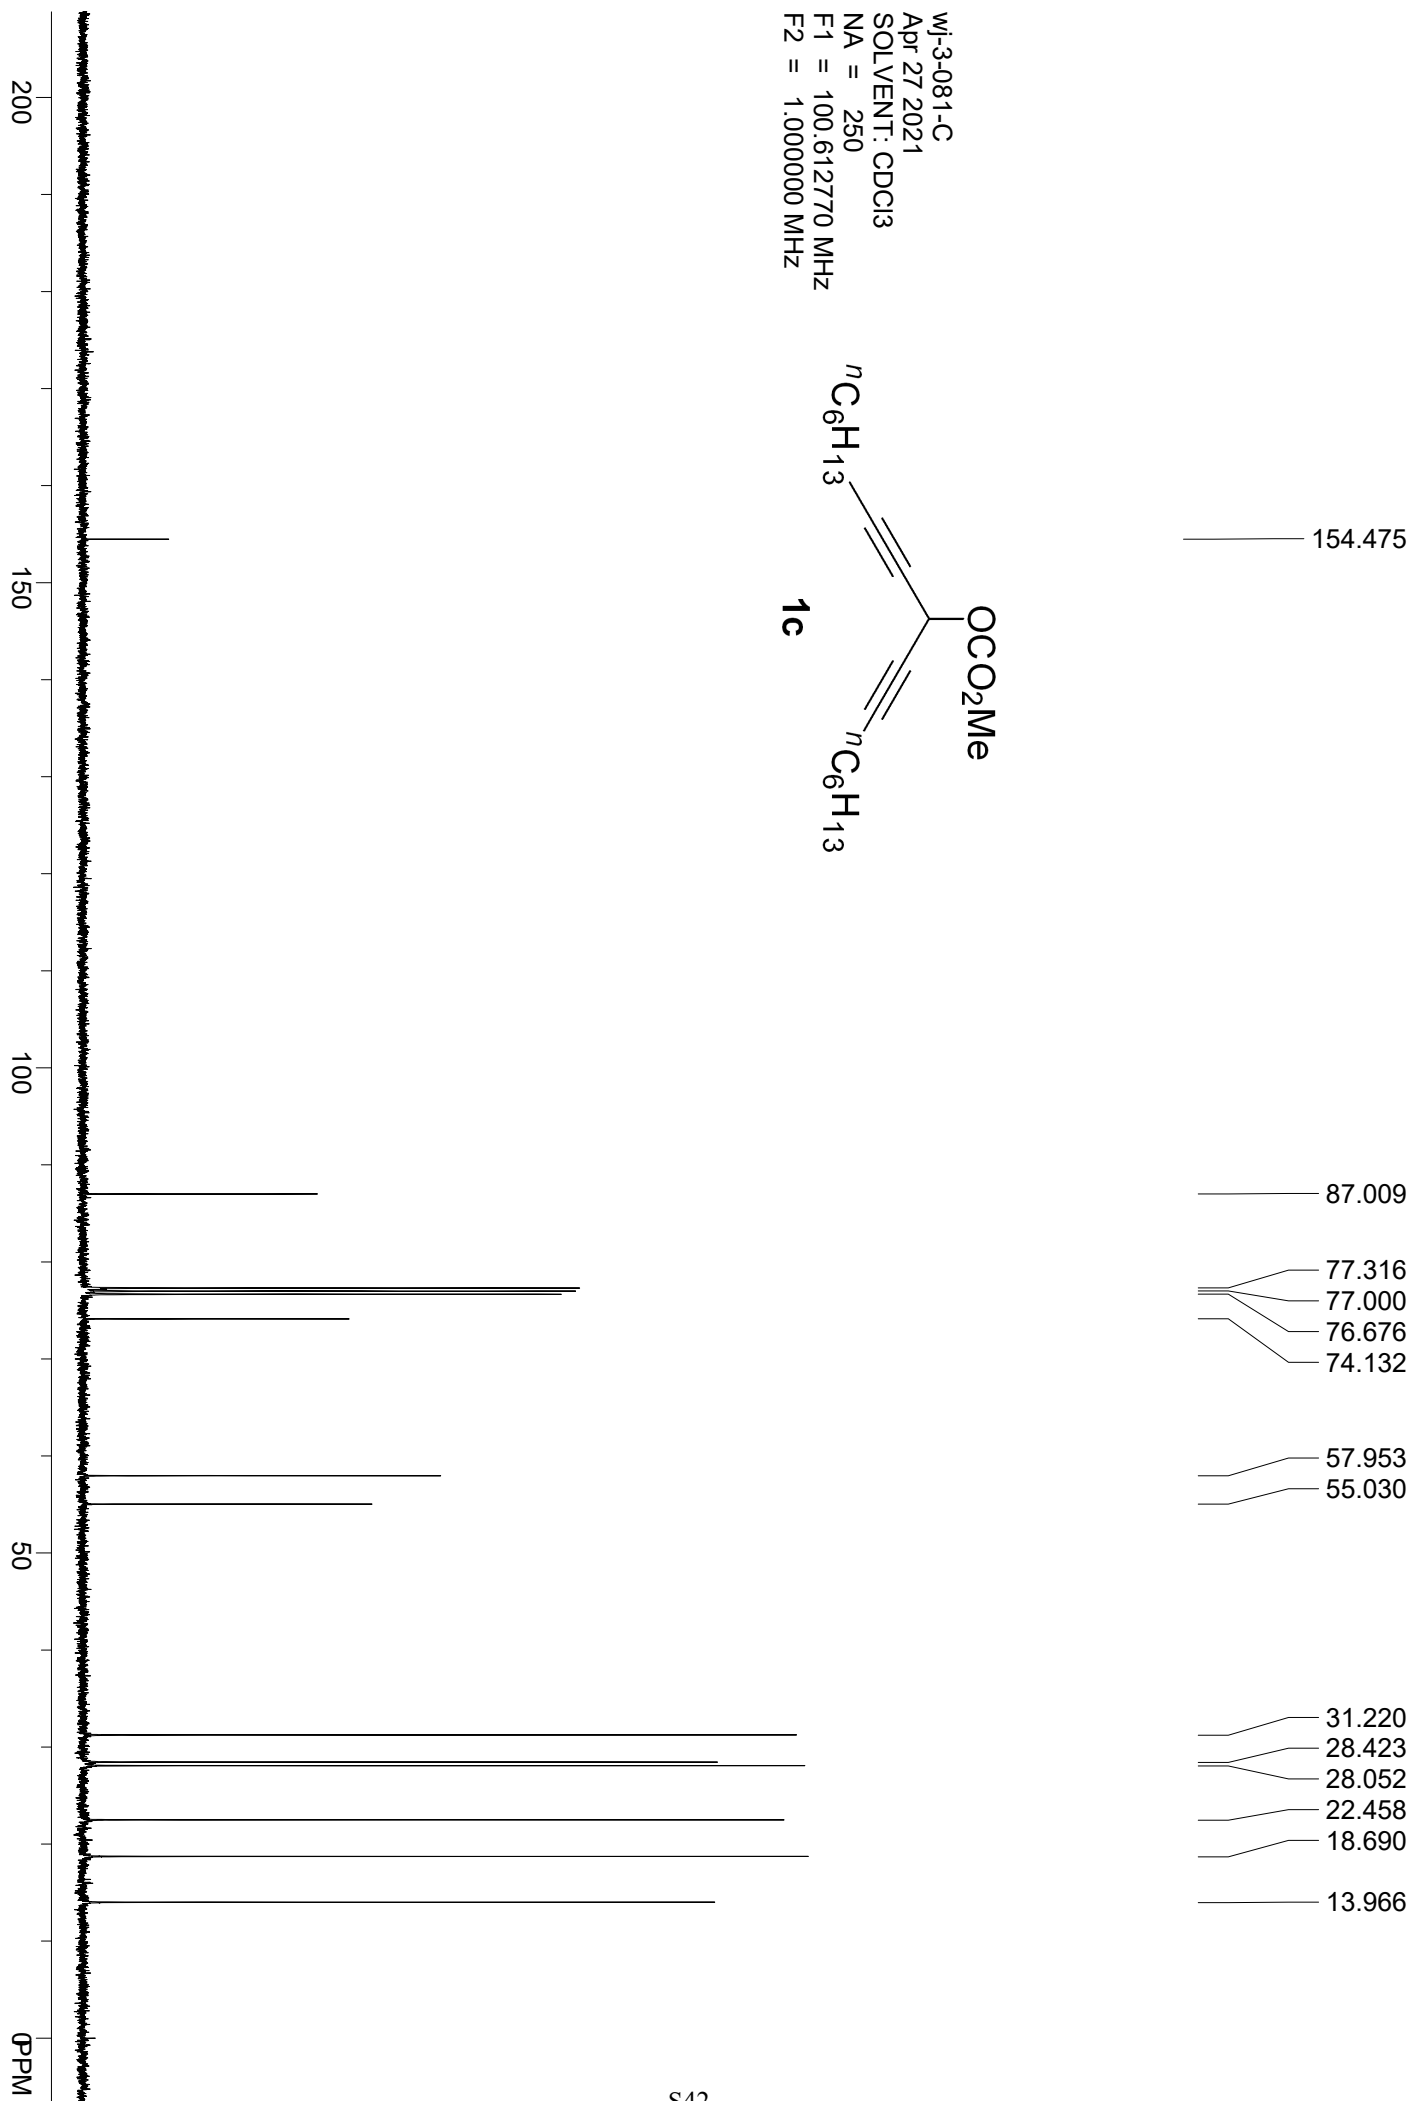

wj-3-082-H  
Apr 27 2021  
SOLVENT: CDCl3  
NA = 4  
F1 = 400.130005 MHz  
F2 = 1.000000 MHz

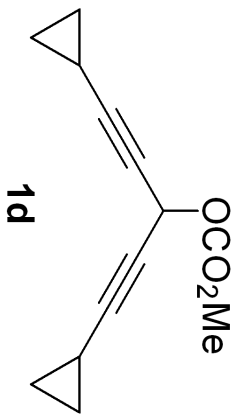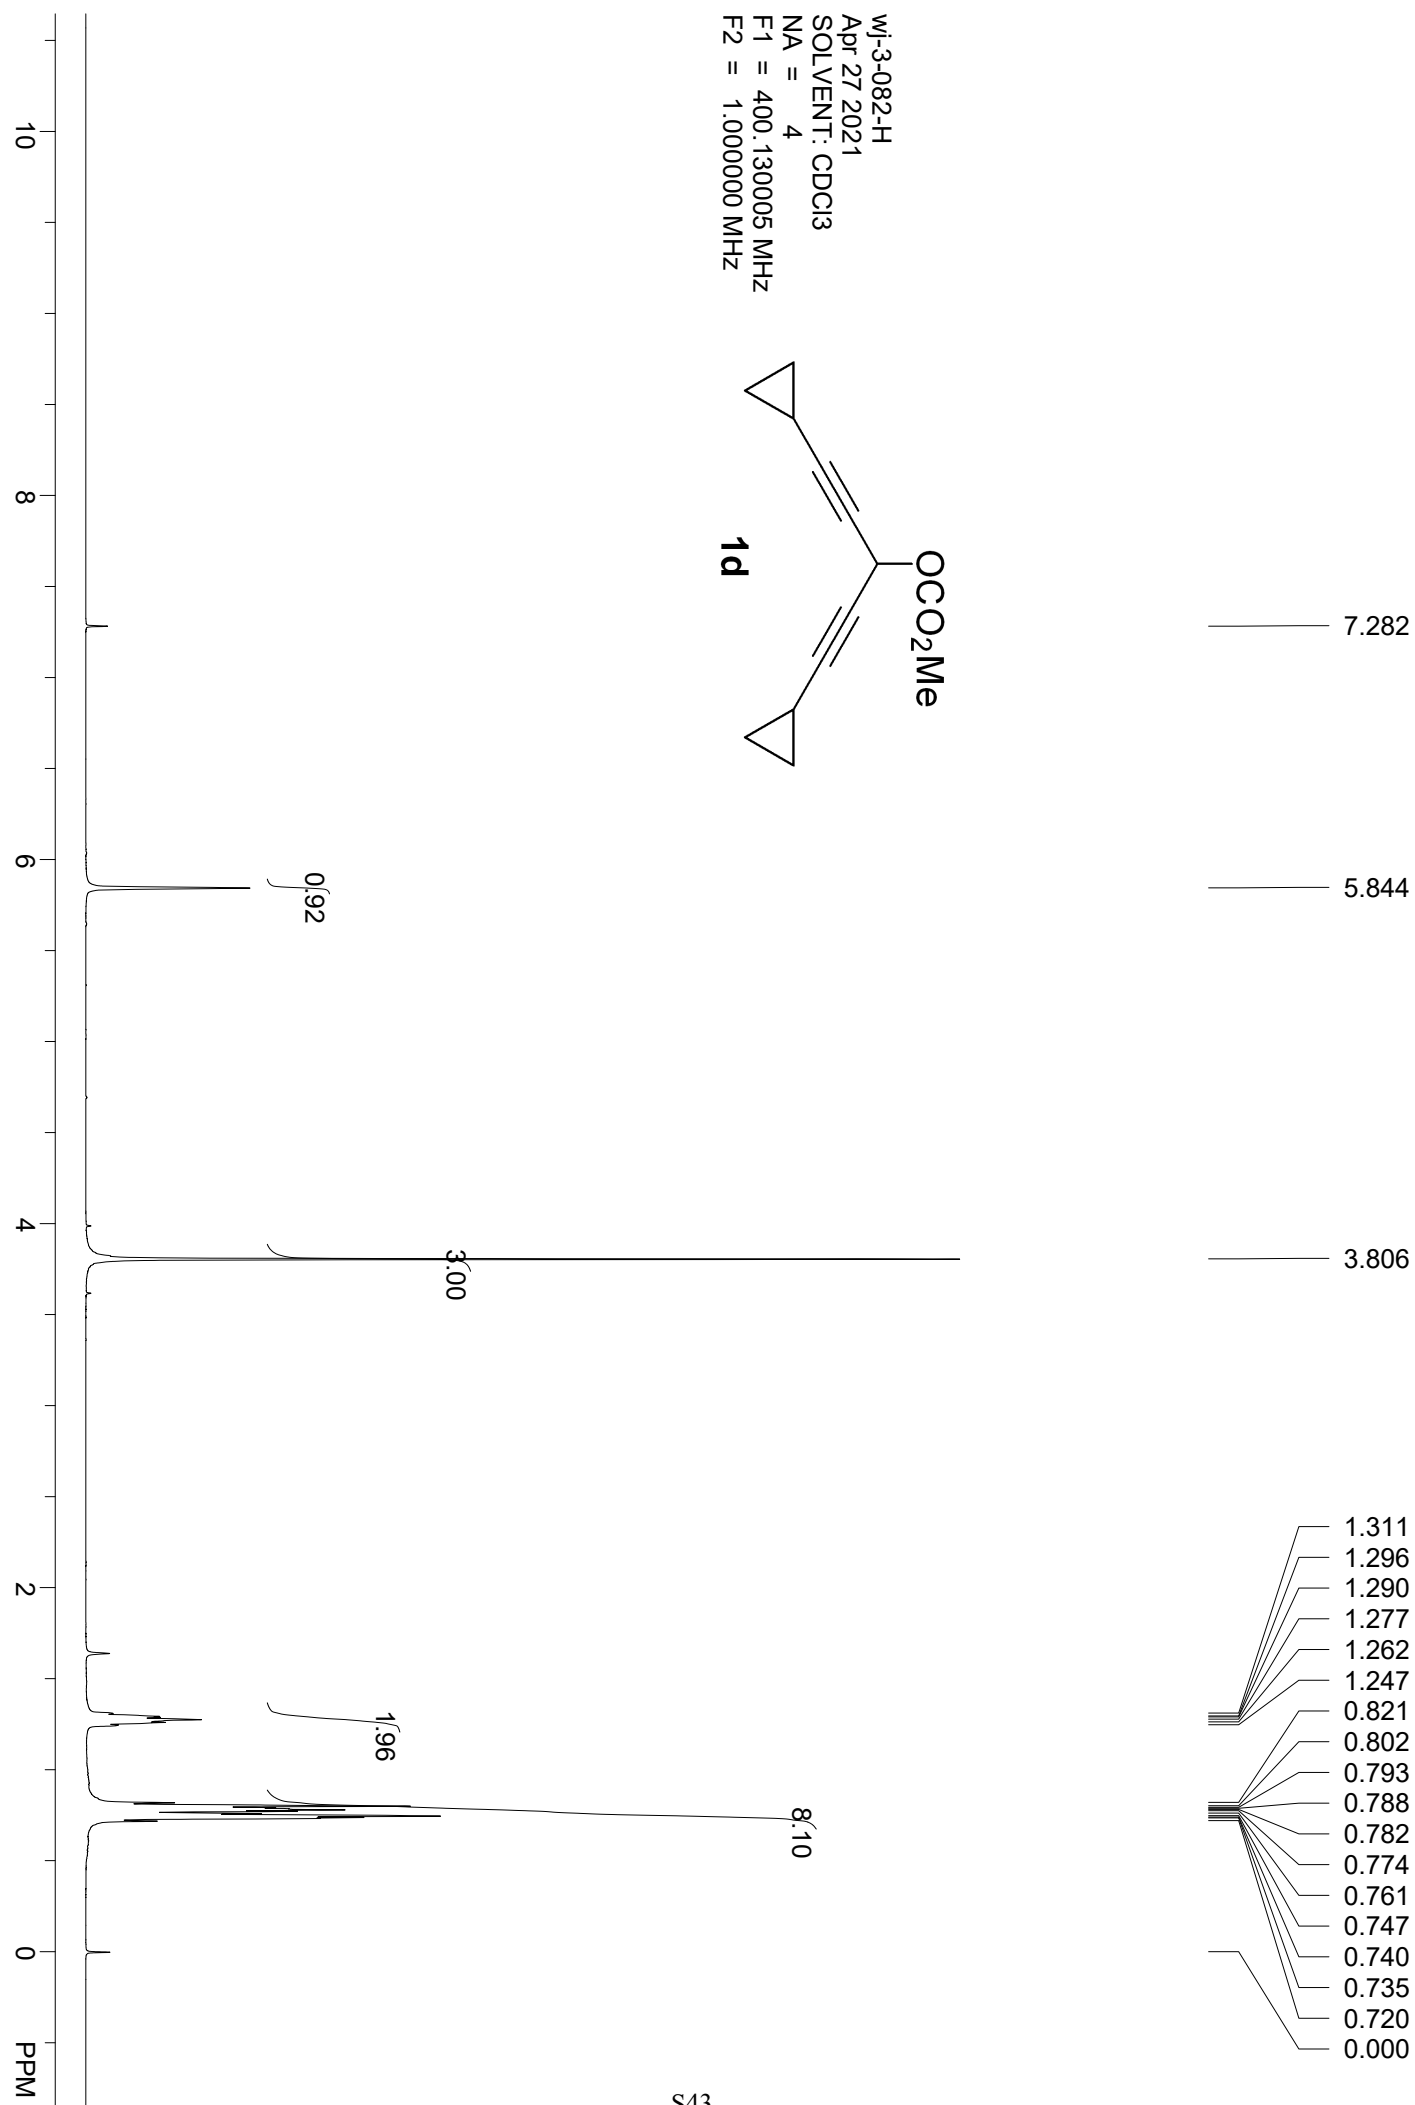

wf-3-082-C  
Apr 27 2021  
SOLVENT: CDCl3  
NA = 300  
F1 = 100.612709 MHz  
F2 = 1.000000 MHz

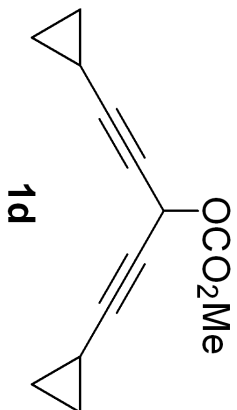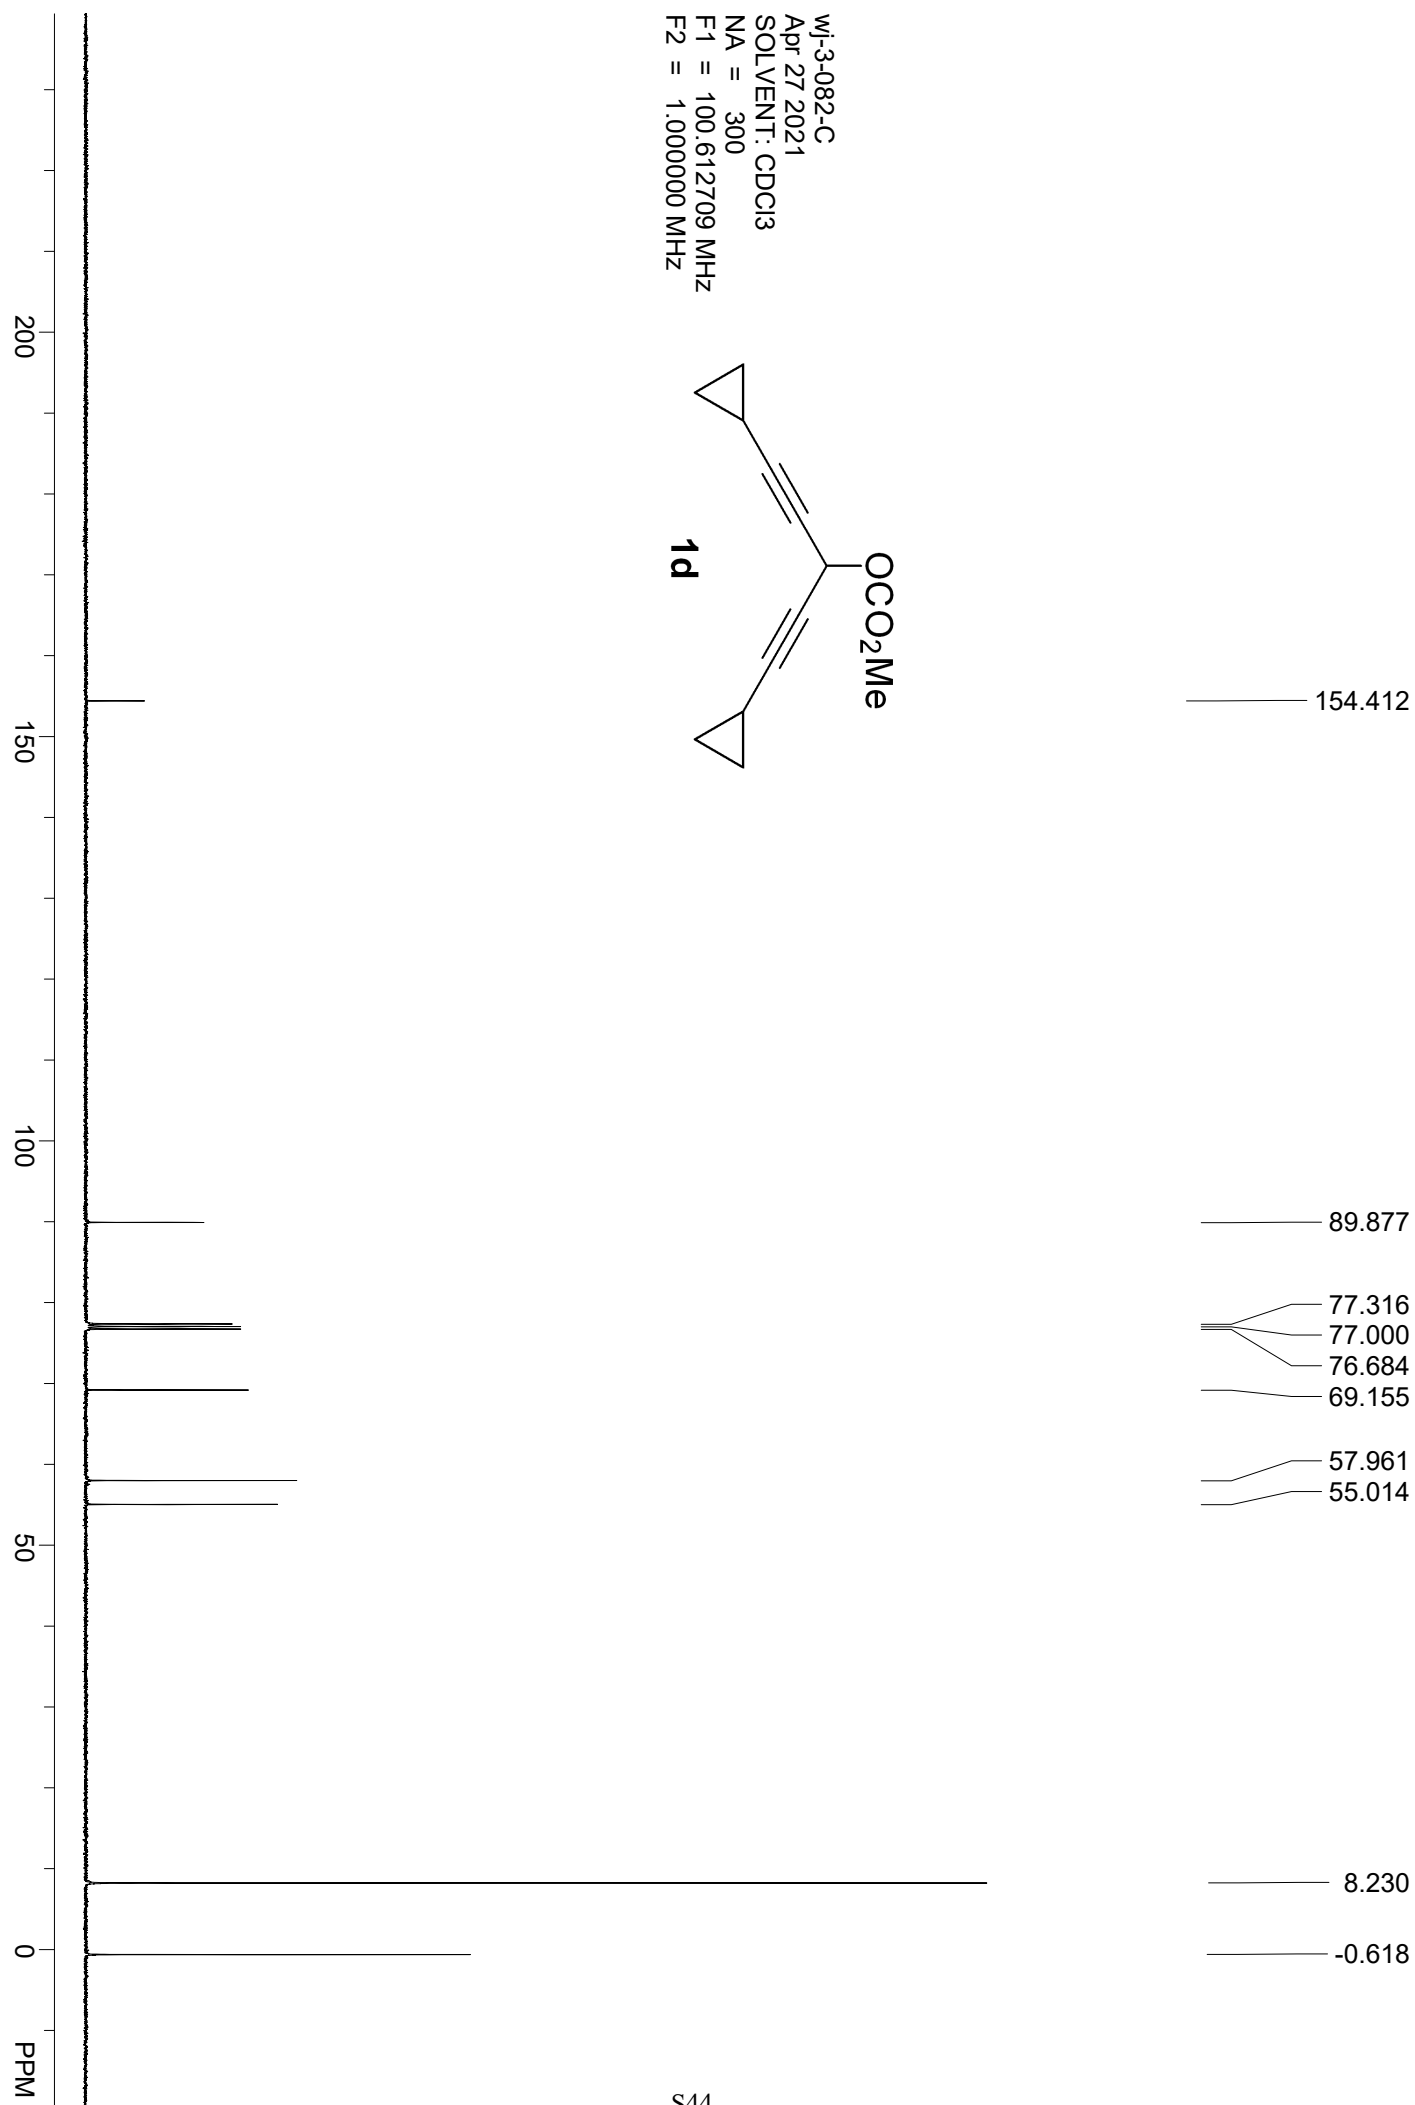



wj-3-154-H  
Jun 16 2021  
SOLVENT: CDCl3  
NA = 4  
F1 = 400.130005 MHz  
F2 = 1.000000 MHz

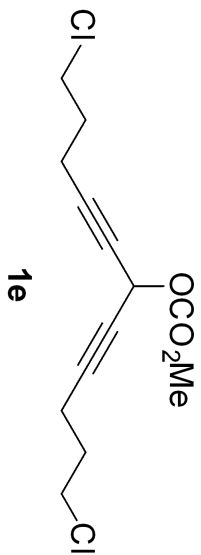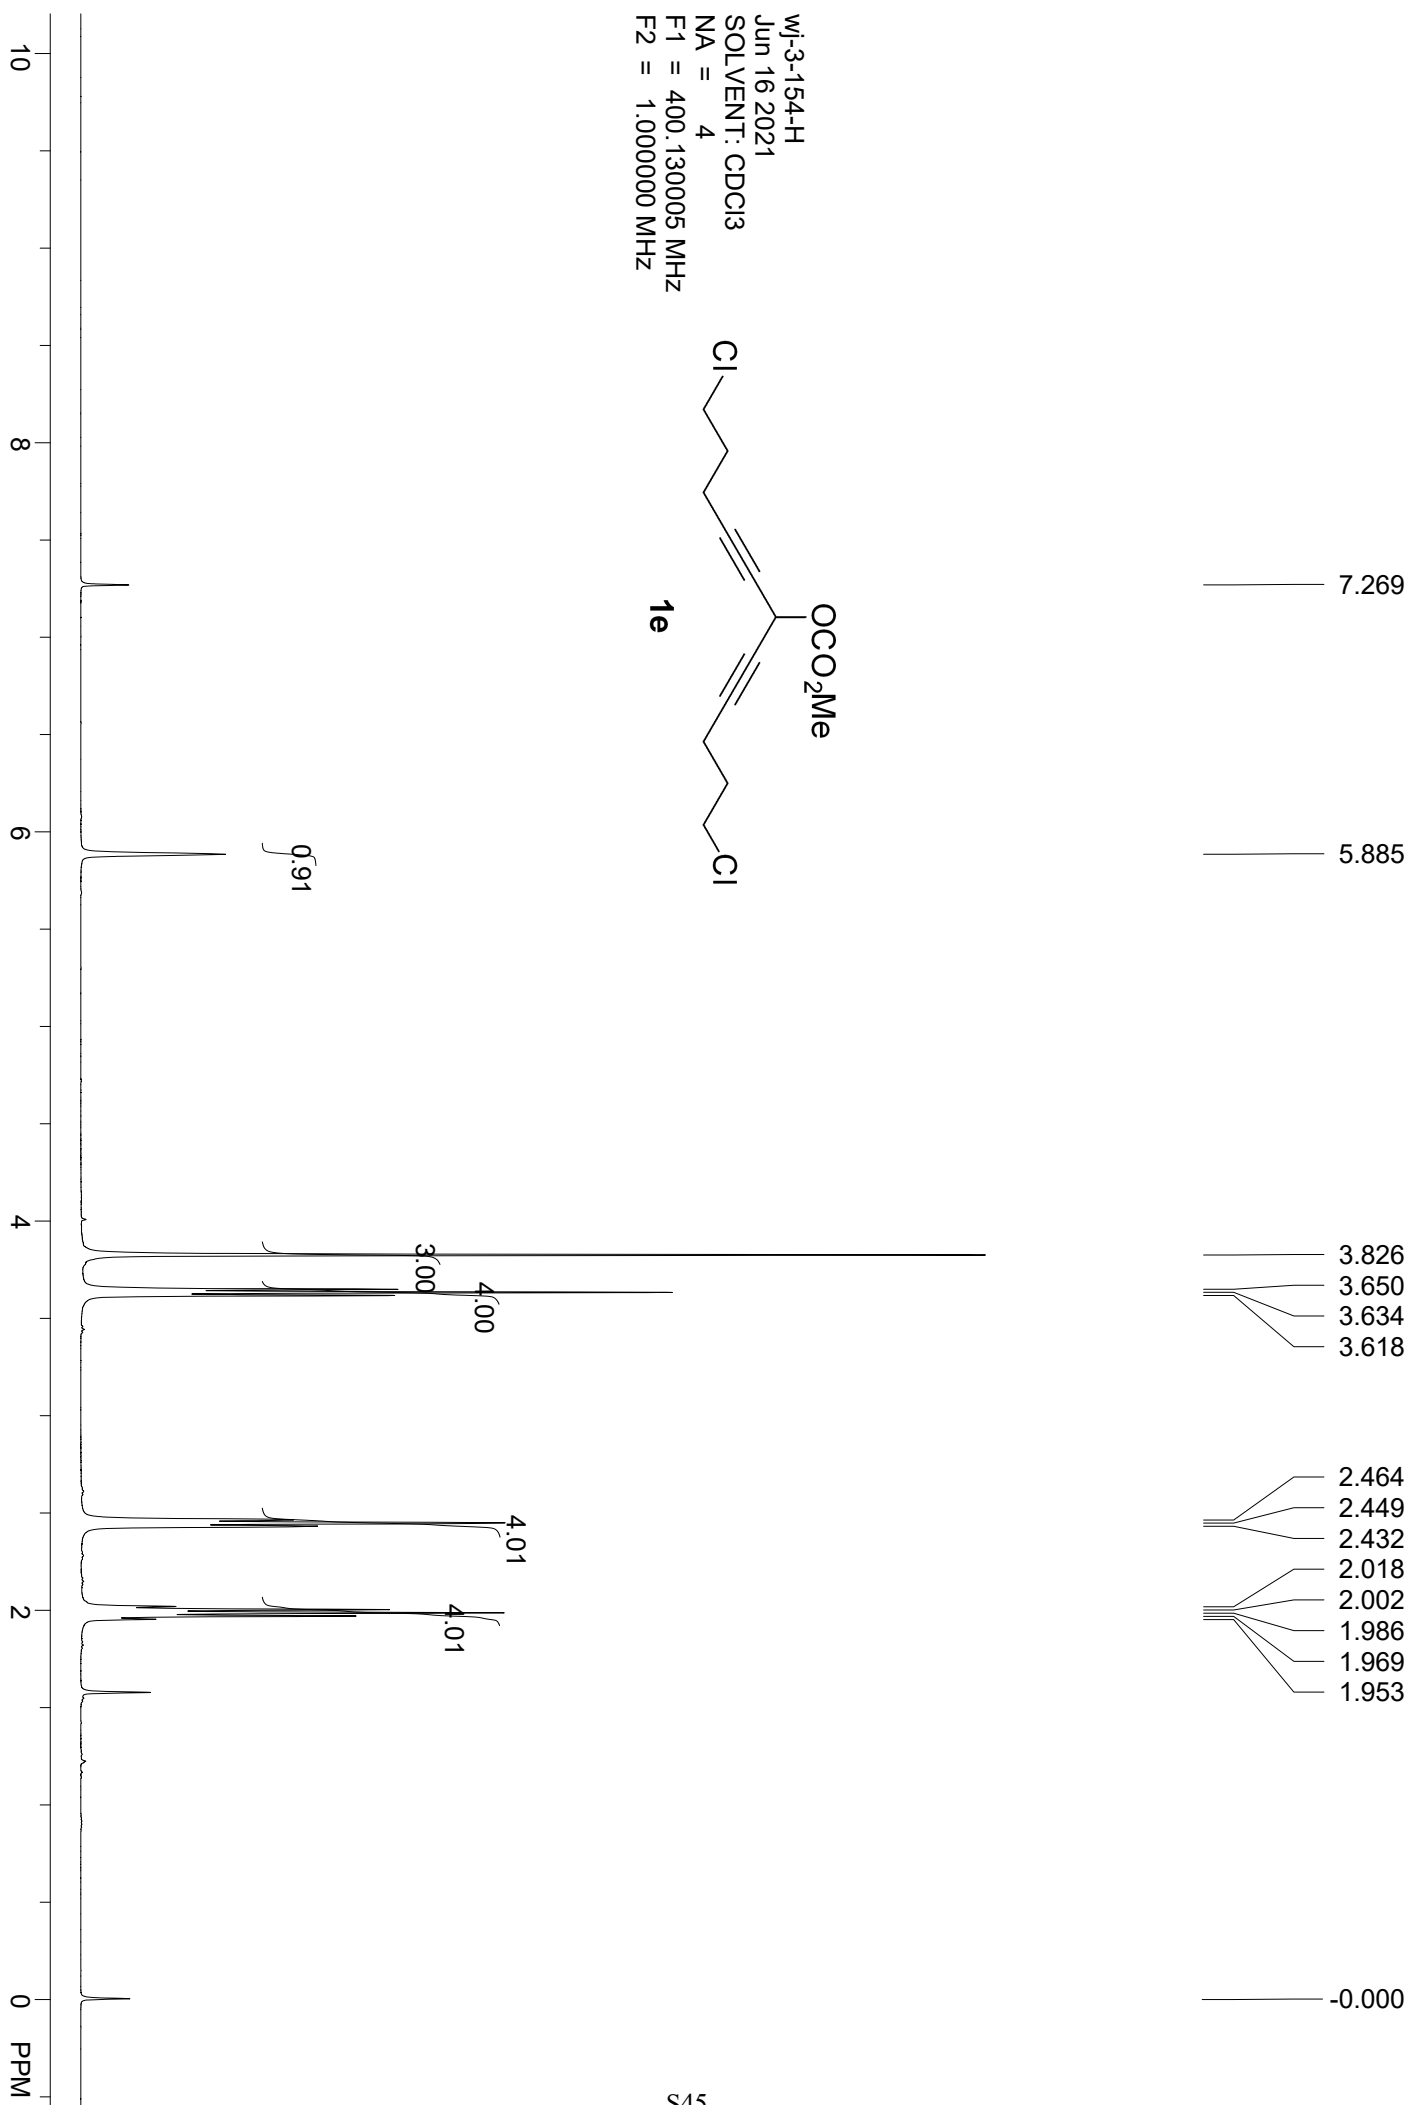

wj-3-154-C  
Jun 16 2021  
SOLVENT: CDCl3  
NA = 350  
F1 = 100.612770 MHz  
F2 = 1.000000 MHz

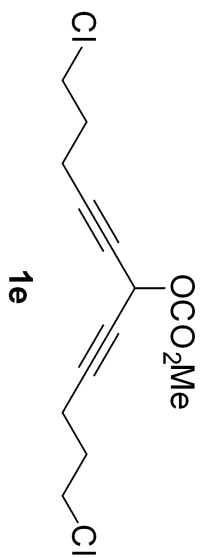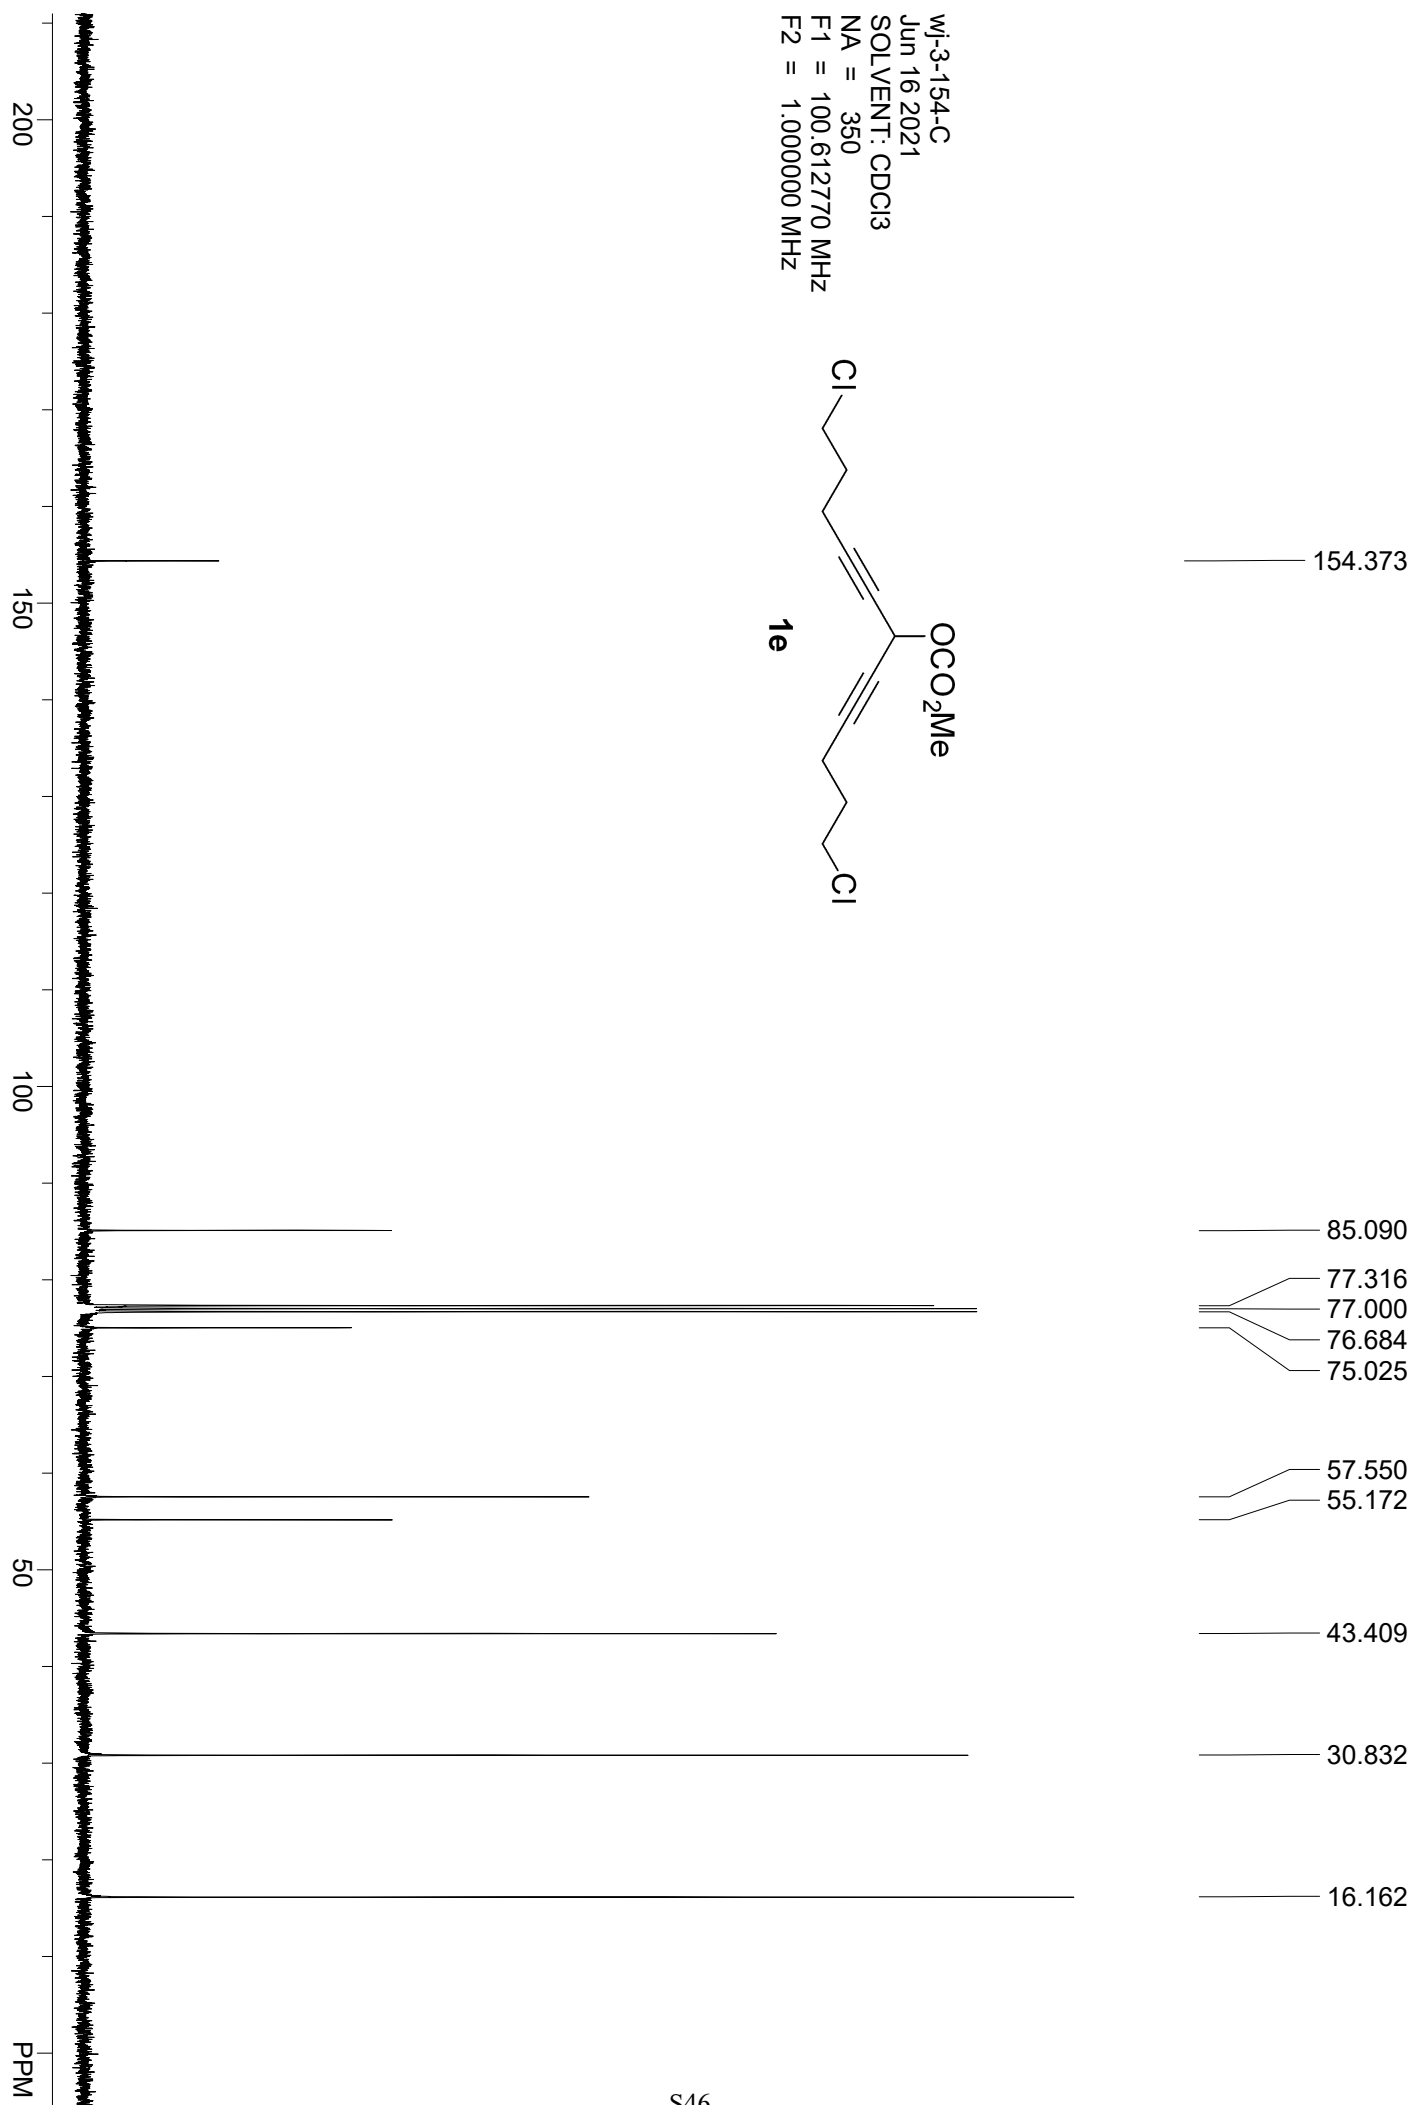

wj-3-094-H  
May 11 2021  
SOLVENT: CDCl3  
NA = 4  
F1 = 400.130005 MHz  
F2 = 1.000000 MHz

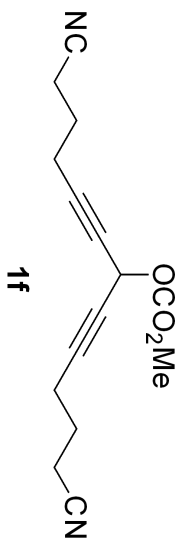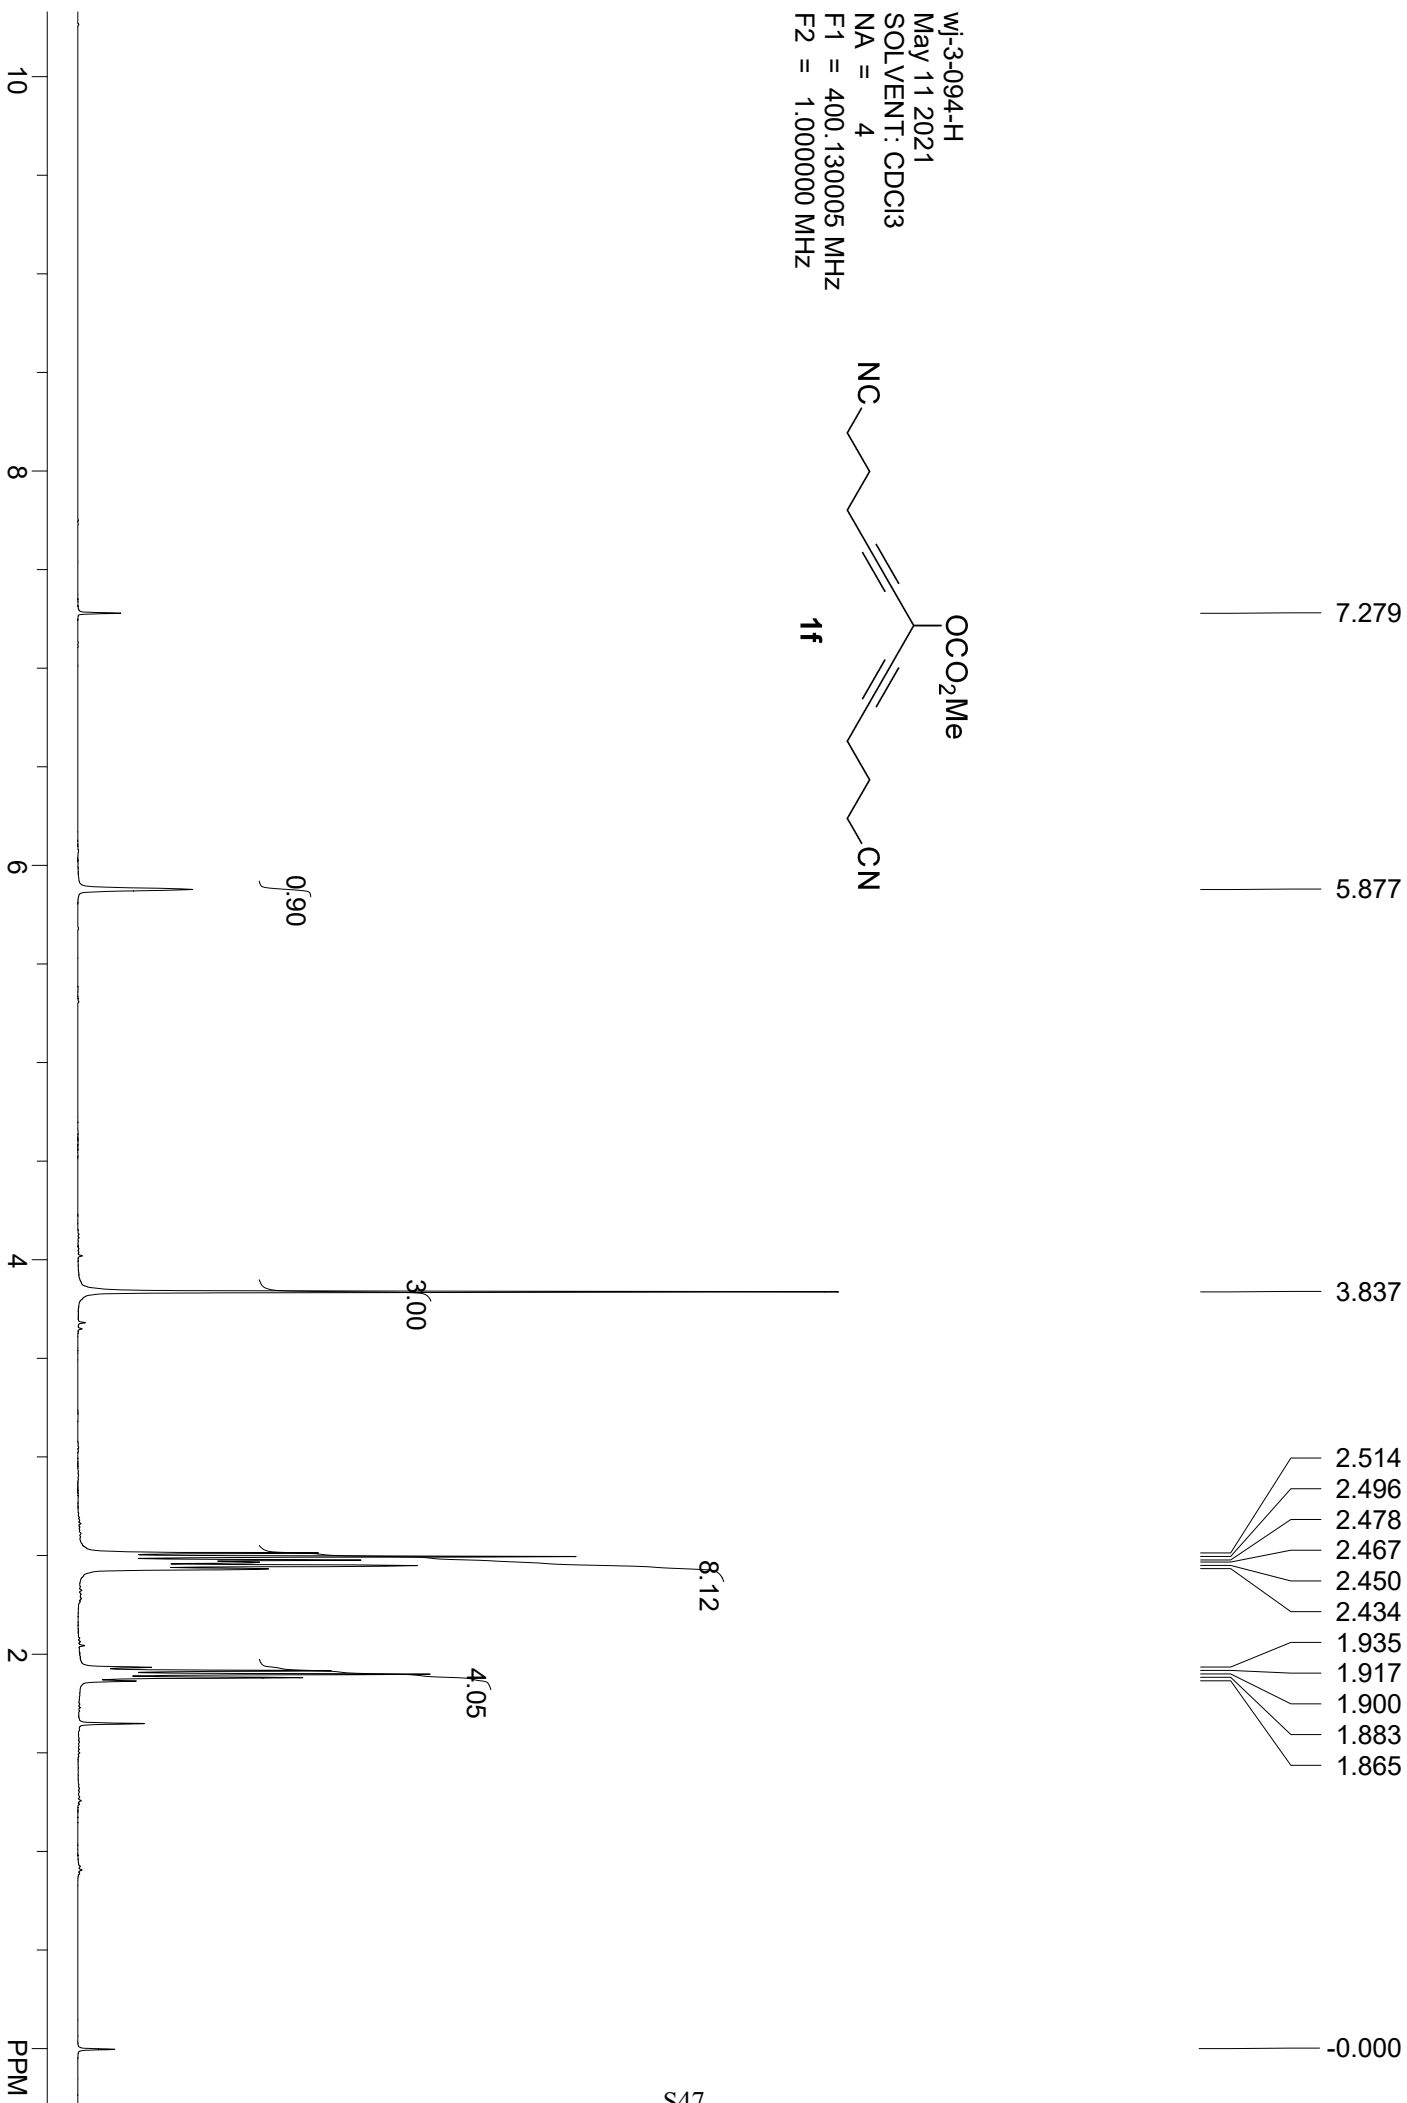

wj-3-094-C  
May 11 2021  
SOLVENT: CDCl3  
NA = 250  
F1 = 100.612770 MHz  
F2 = 1.000000 MHz

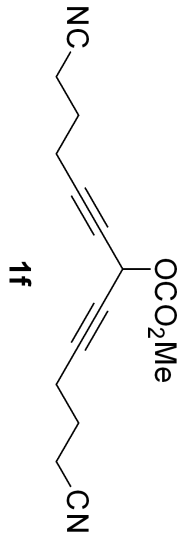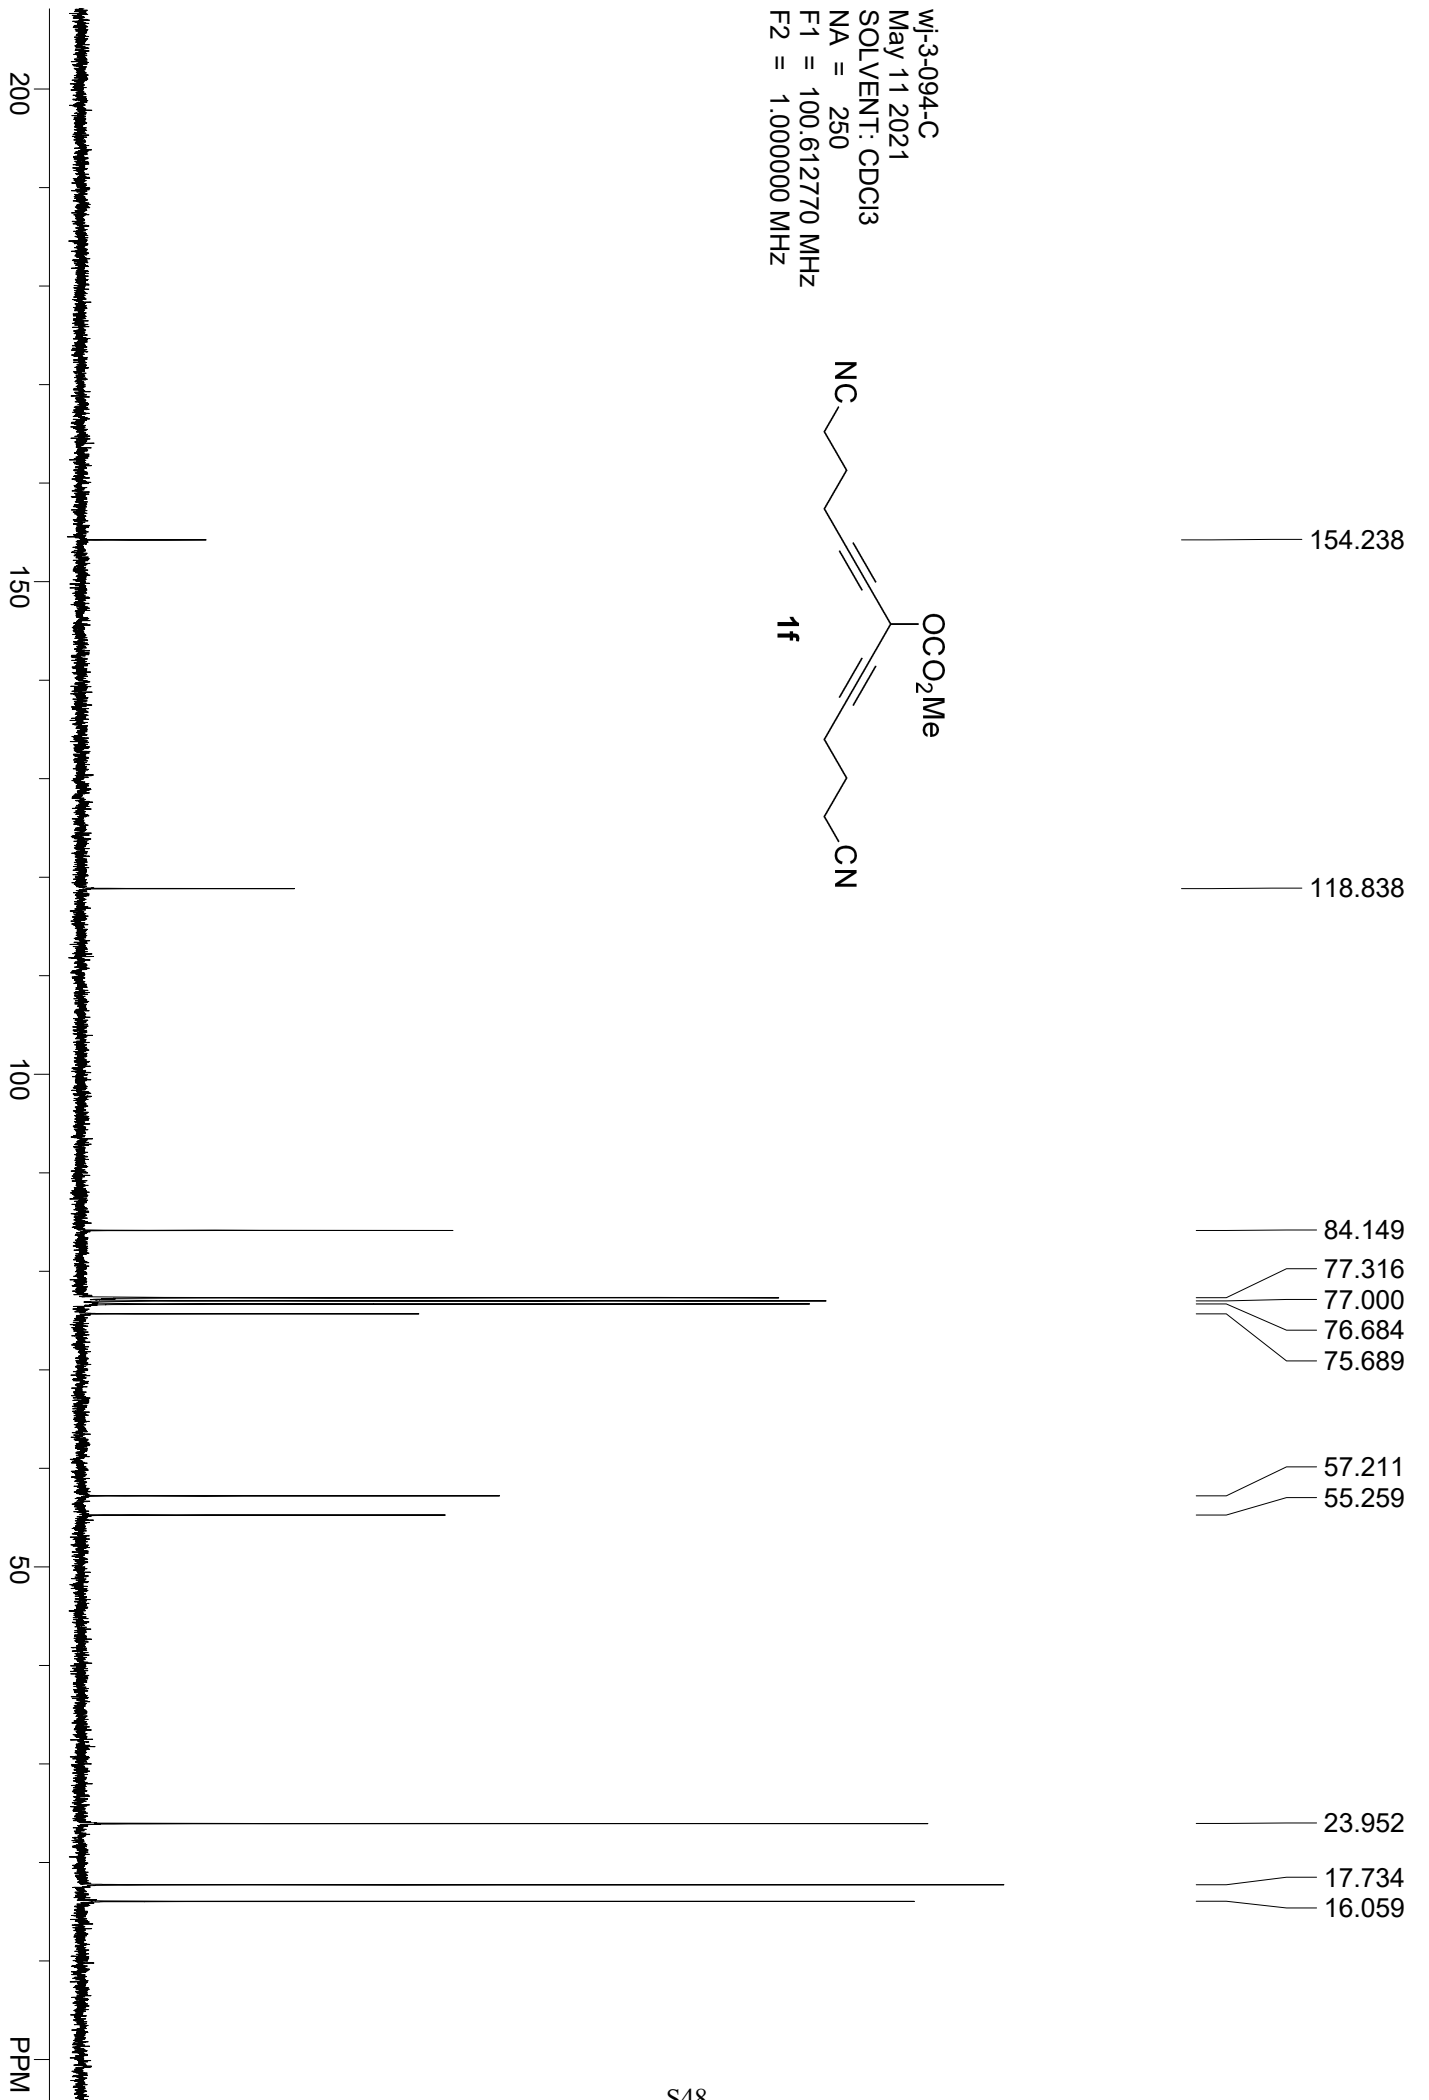

WJ-3-080-H  
 Apr 26 2021  
 SOLVENT: CDCl<sub>3</sub>  
 NA = 4  
 F1 = 400.130035 MHz  
 F2 = 1.000000 MHz

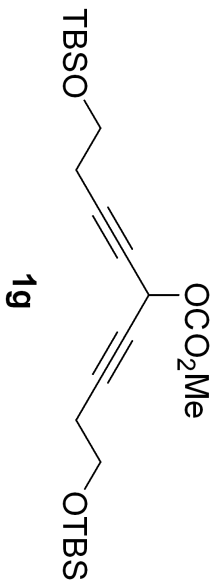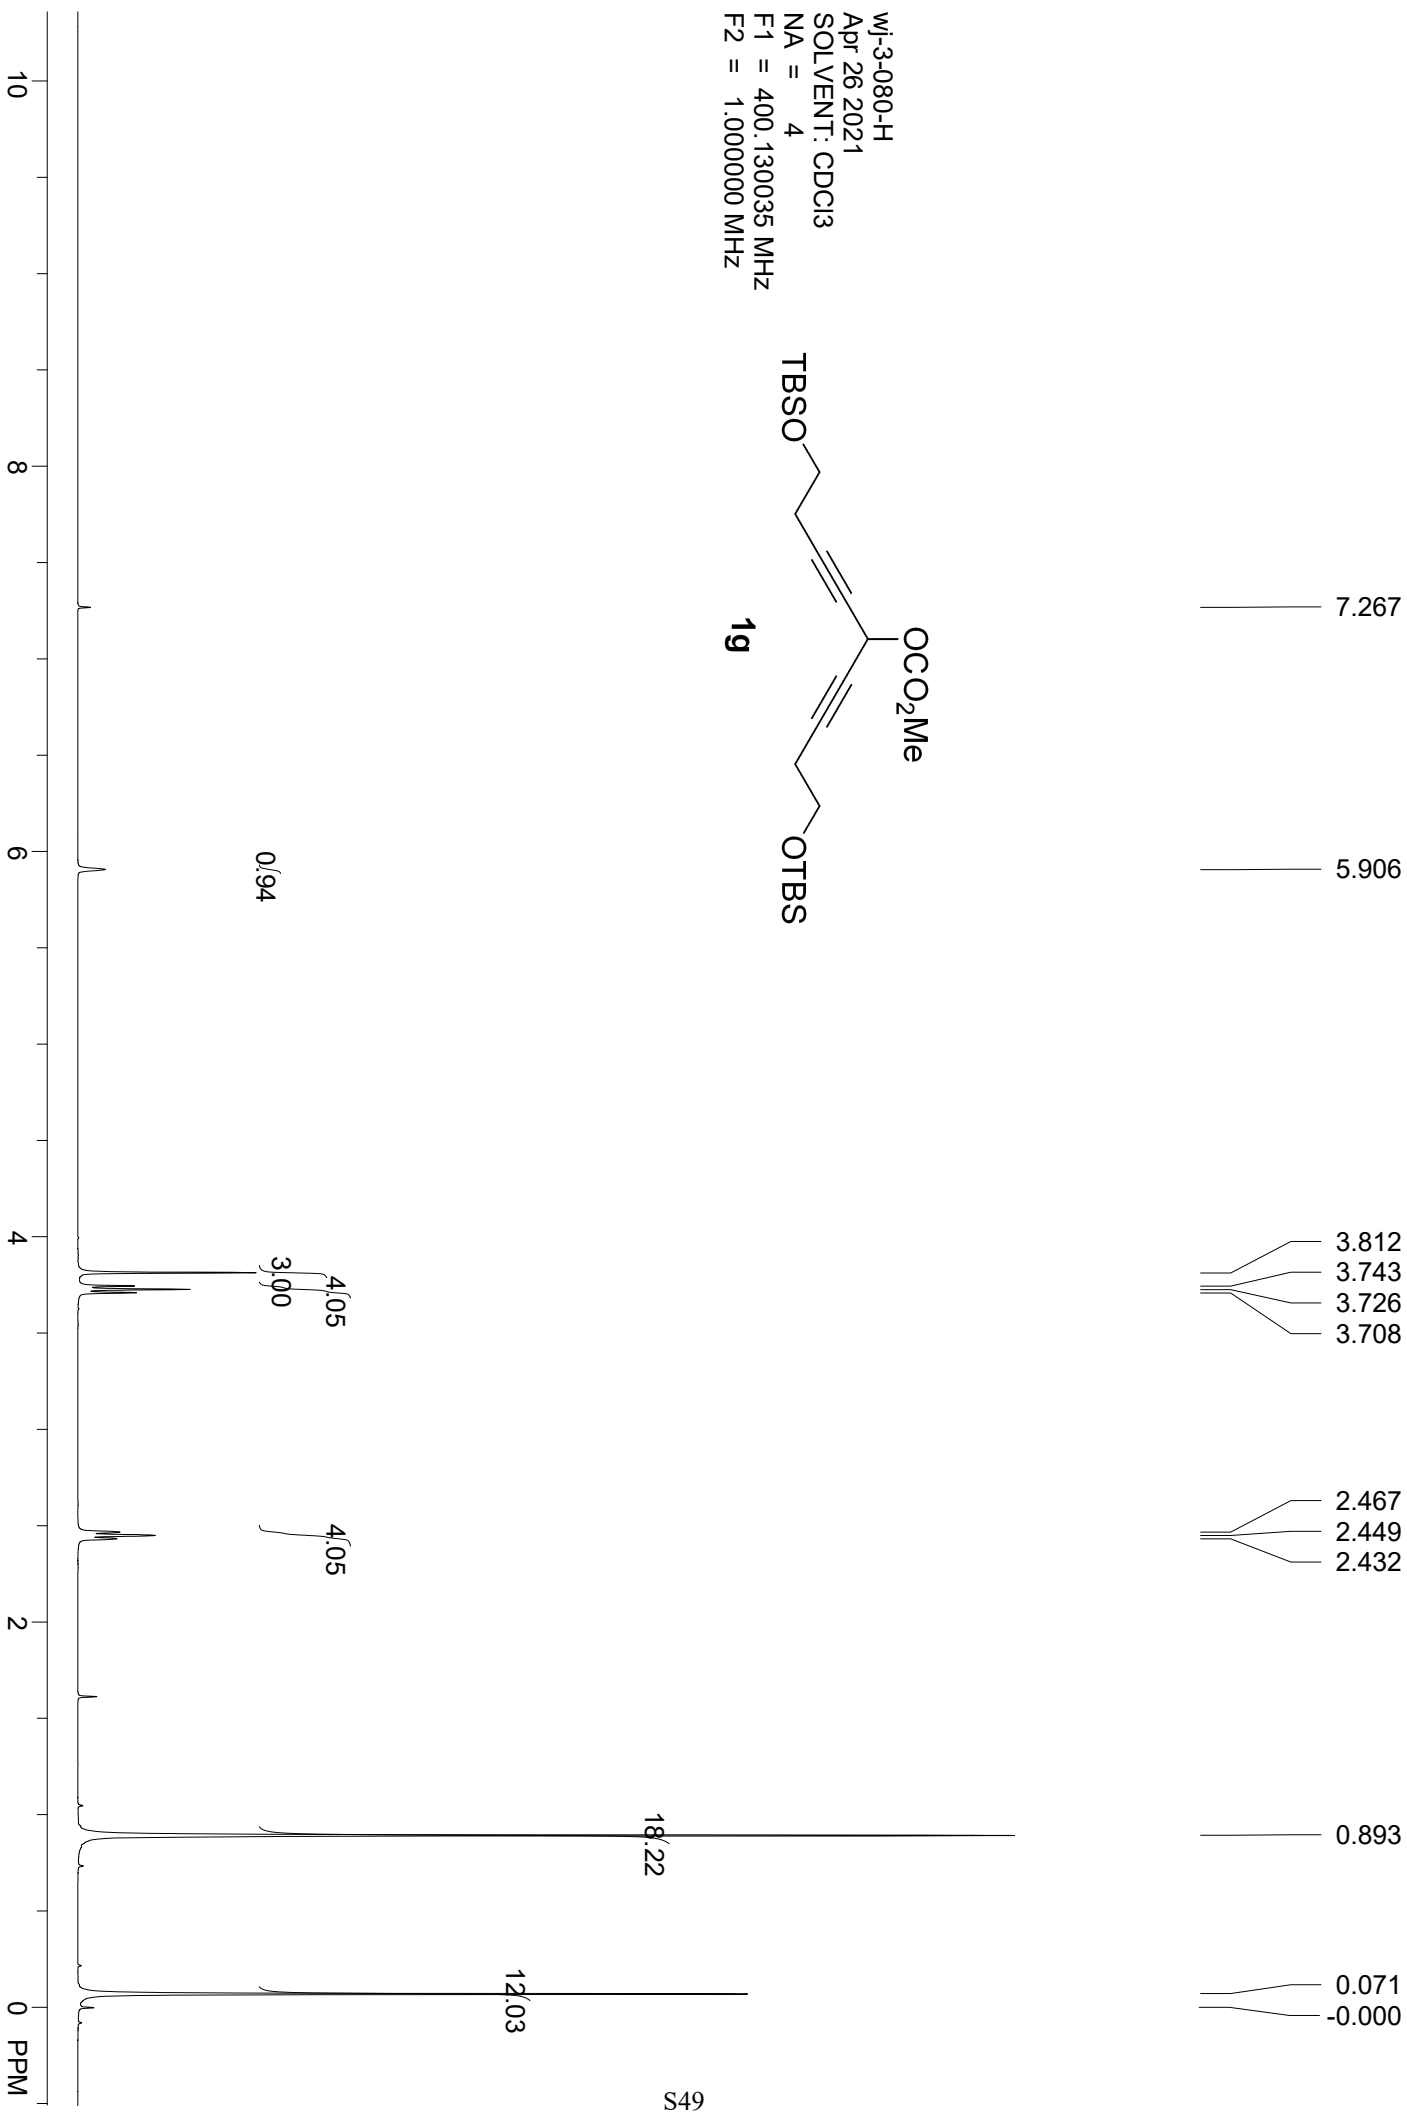



WJ-3-041-H  
Mar 27 2021  
SOLVENT: CDCl3  
NA = 4  
F1 = 400.130005 MHz  
F2 = 1.000000 MHz

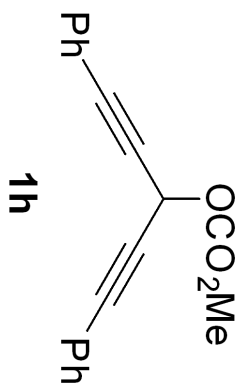

7.515  
7.497  
7.379  
7.361  
7.342  
7.323  
7.308  
7.254  
6.412

3.871

0.000

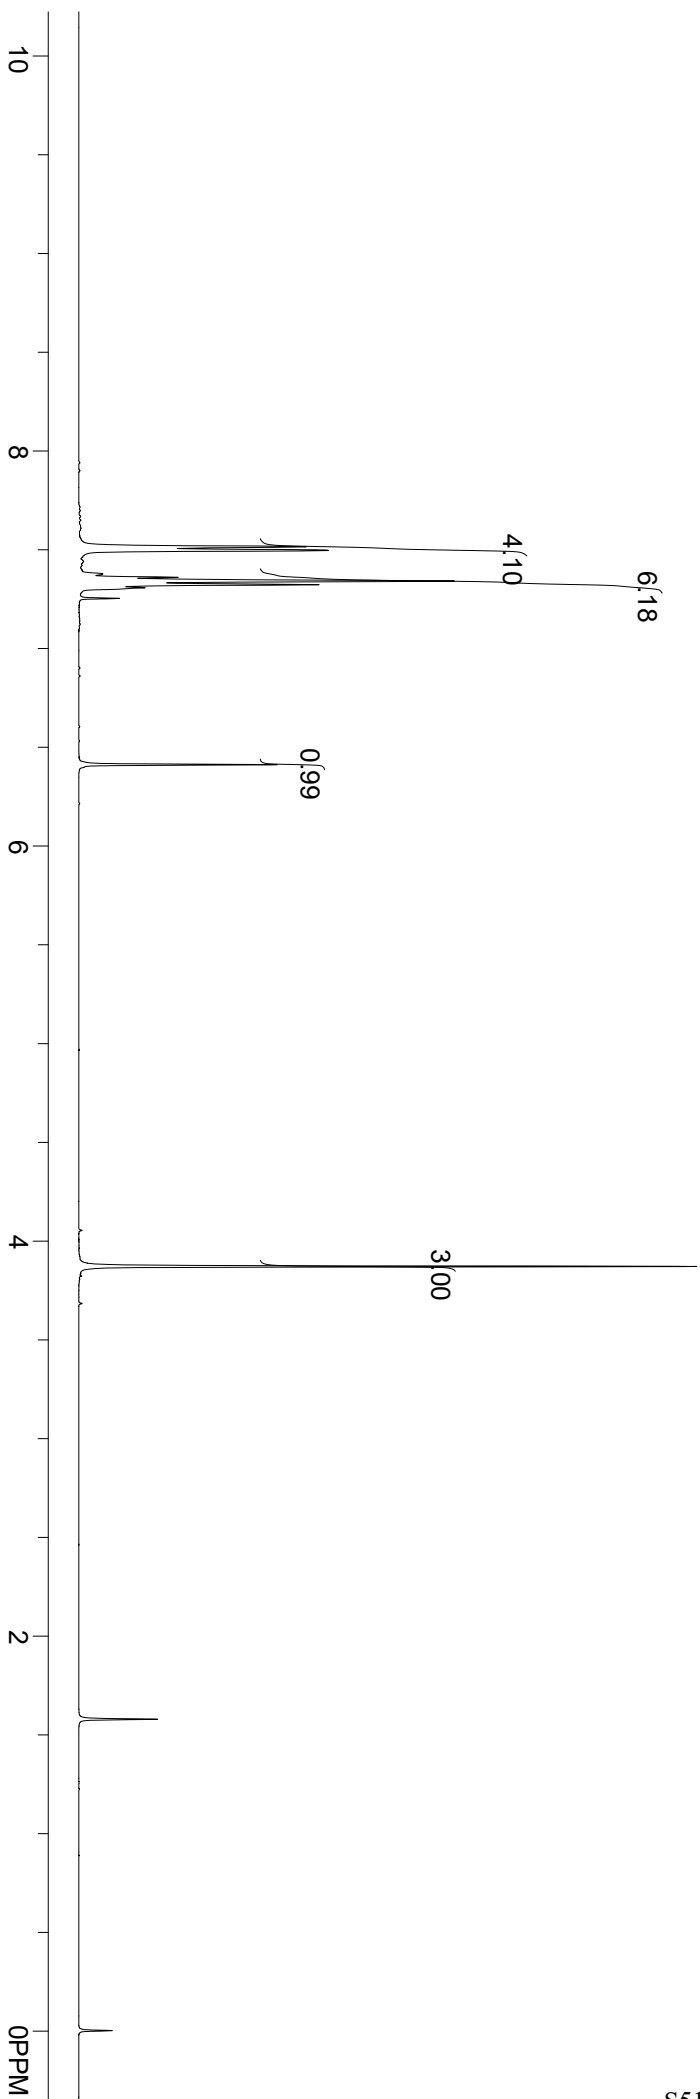

wj-3-041-C  
Mar 27 2021  
SOLVENT: CDCl3  
NA = 400  
F1 = 100.612770 MHz  
F2 = 1.000000 MHz

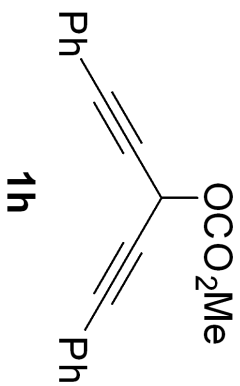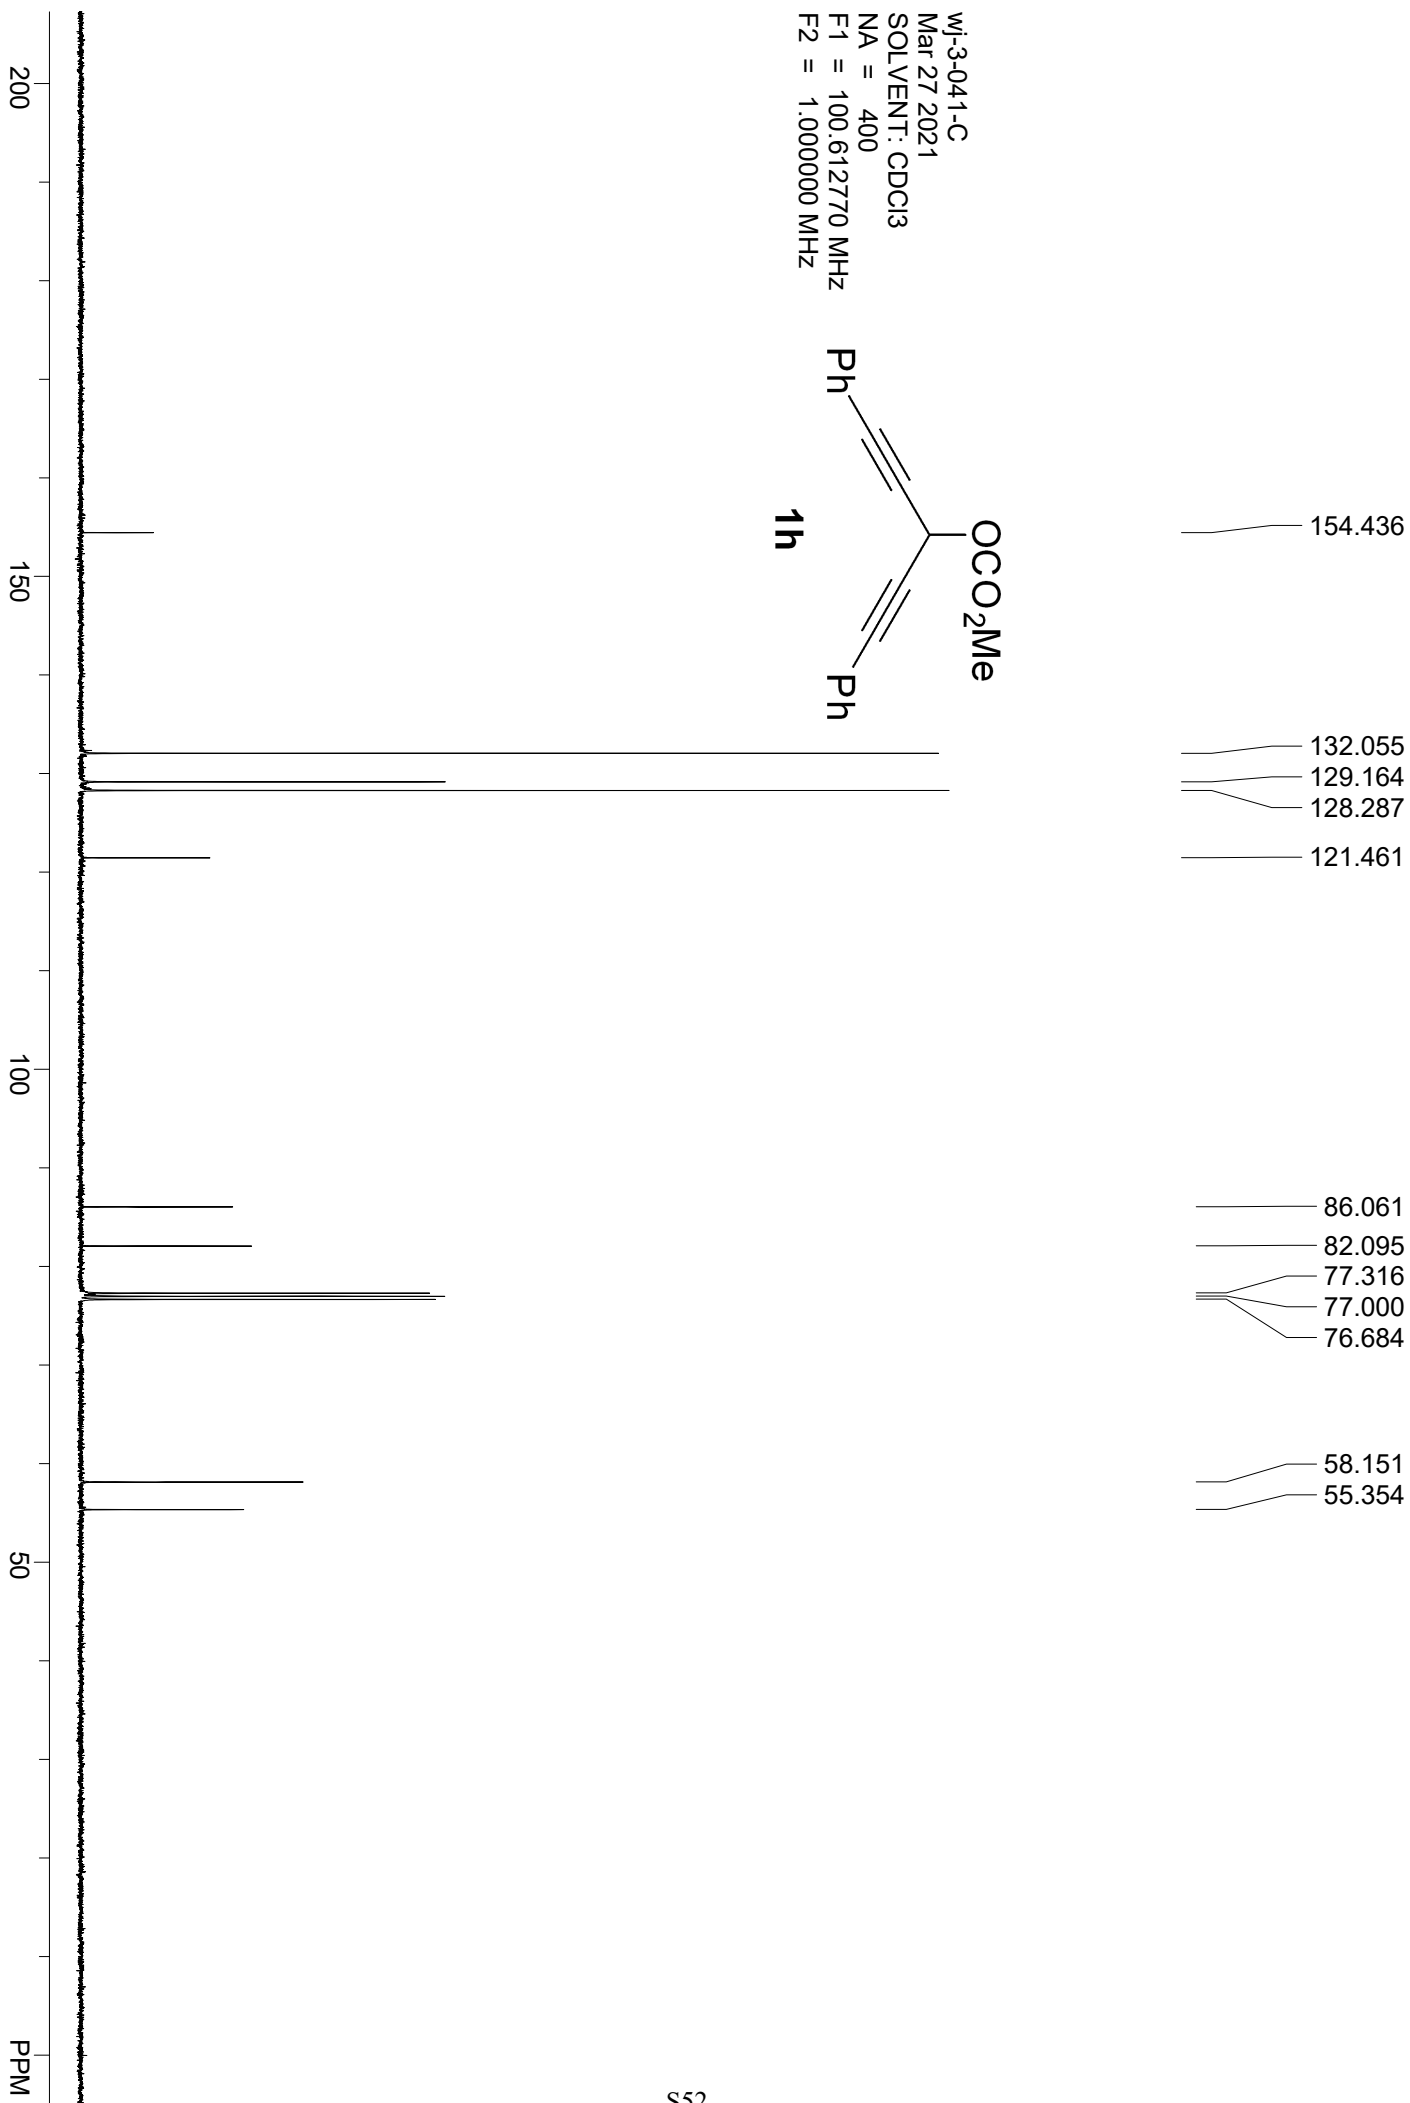



wj-3-166-H  
Jun 23 2021  
SOLVENT: CDCl3  
NA = 4  
F1 = 400.130005 MHz  
F2 = 1.000000 MHz

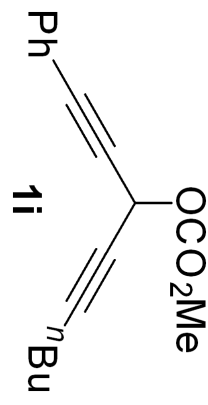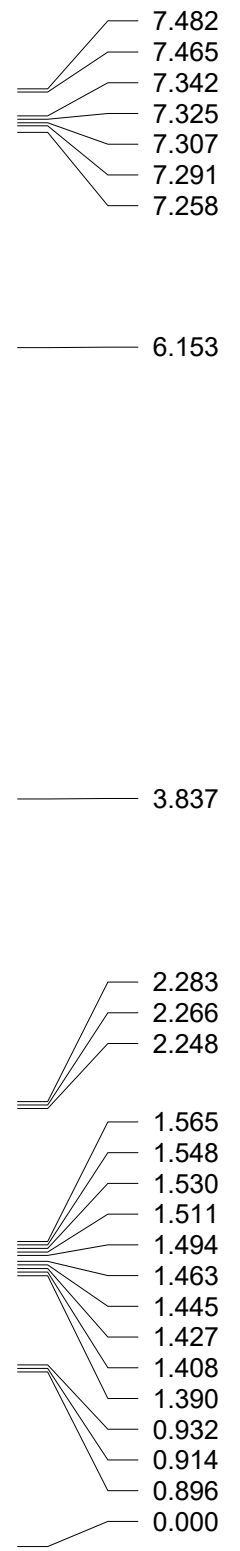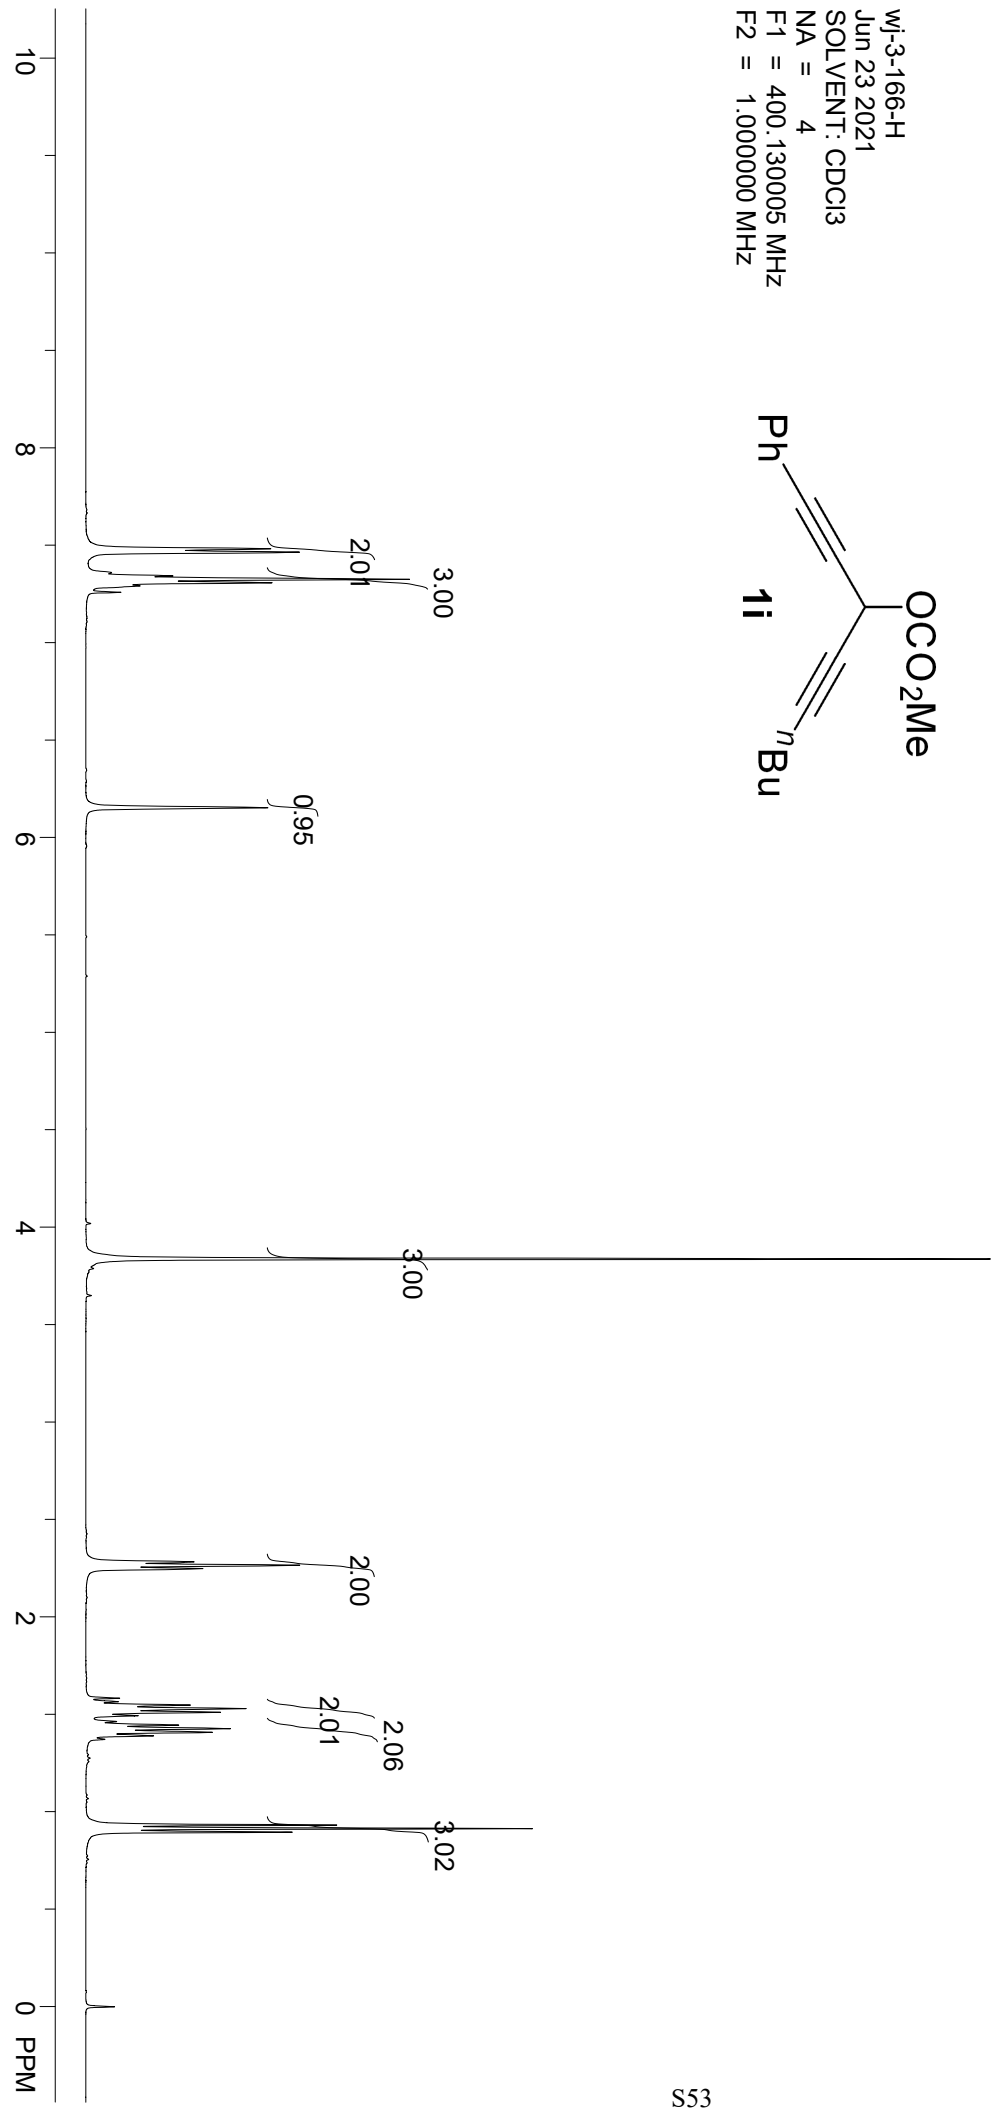

wj-3-166-C  
Jun 23 2021  
SOLVENT: CDCl3  
NA = 400  
F1 = 100.612770 MHz  
F2 = 1.000000 MHz

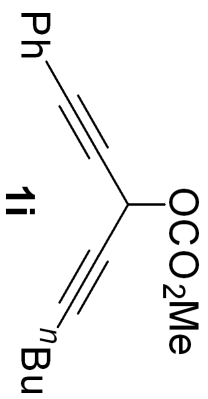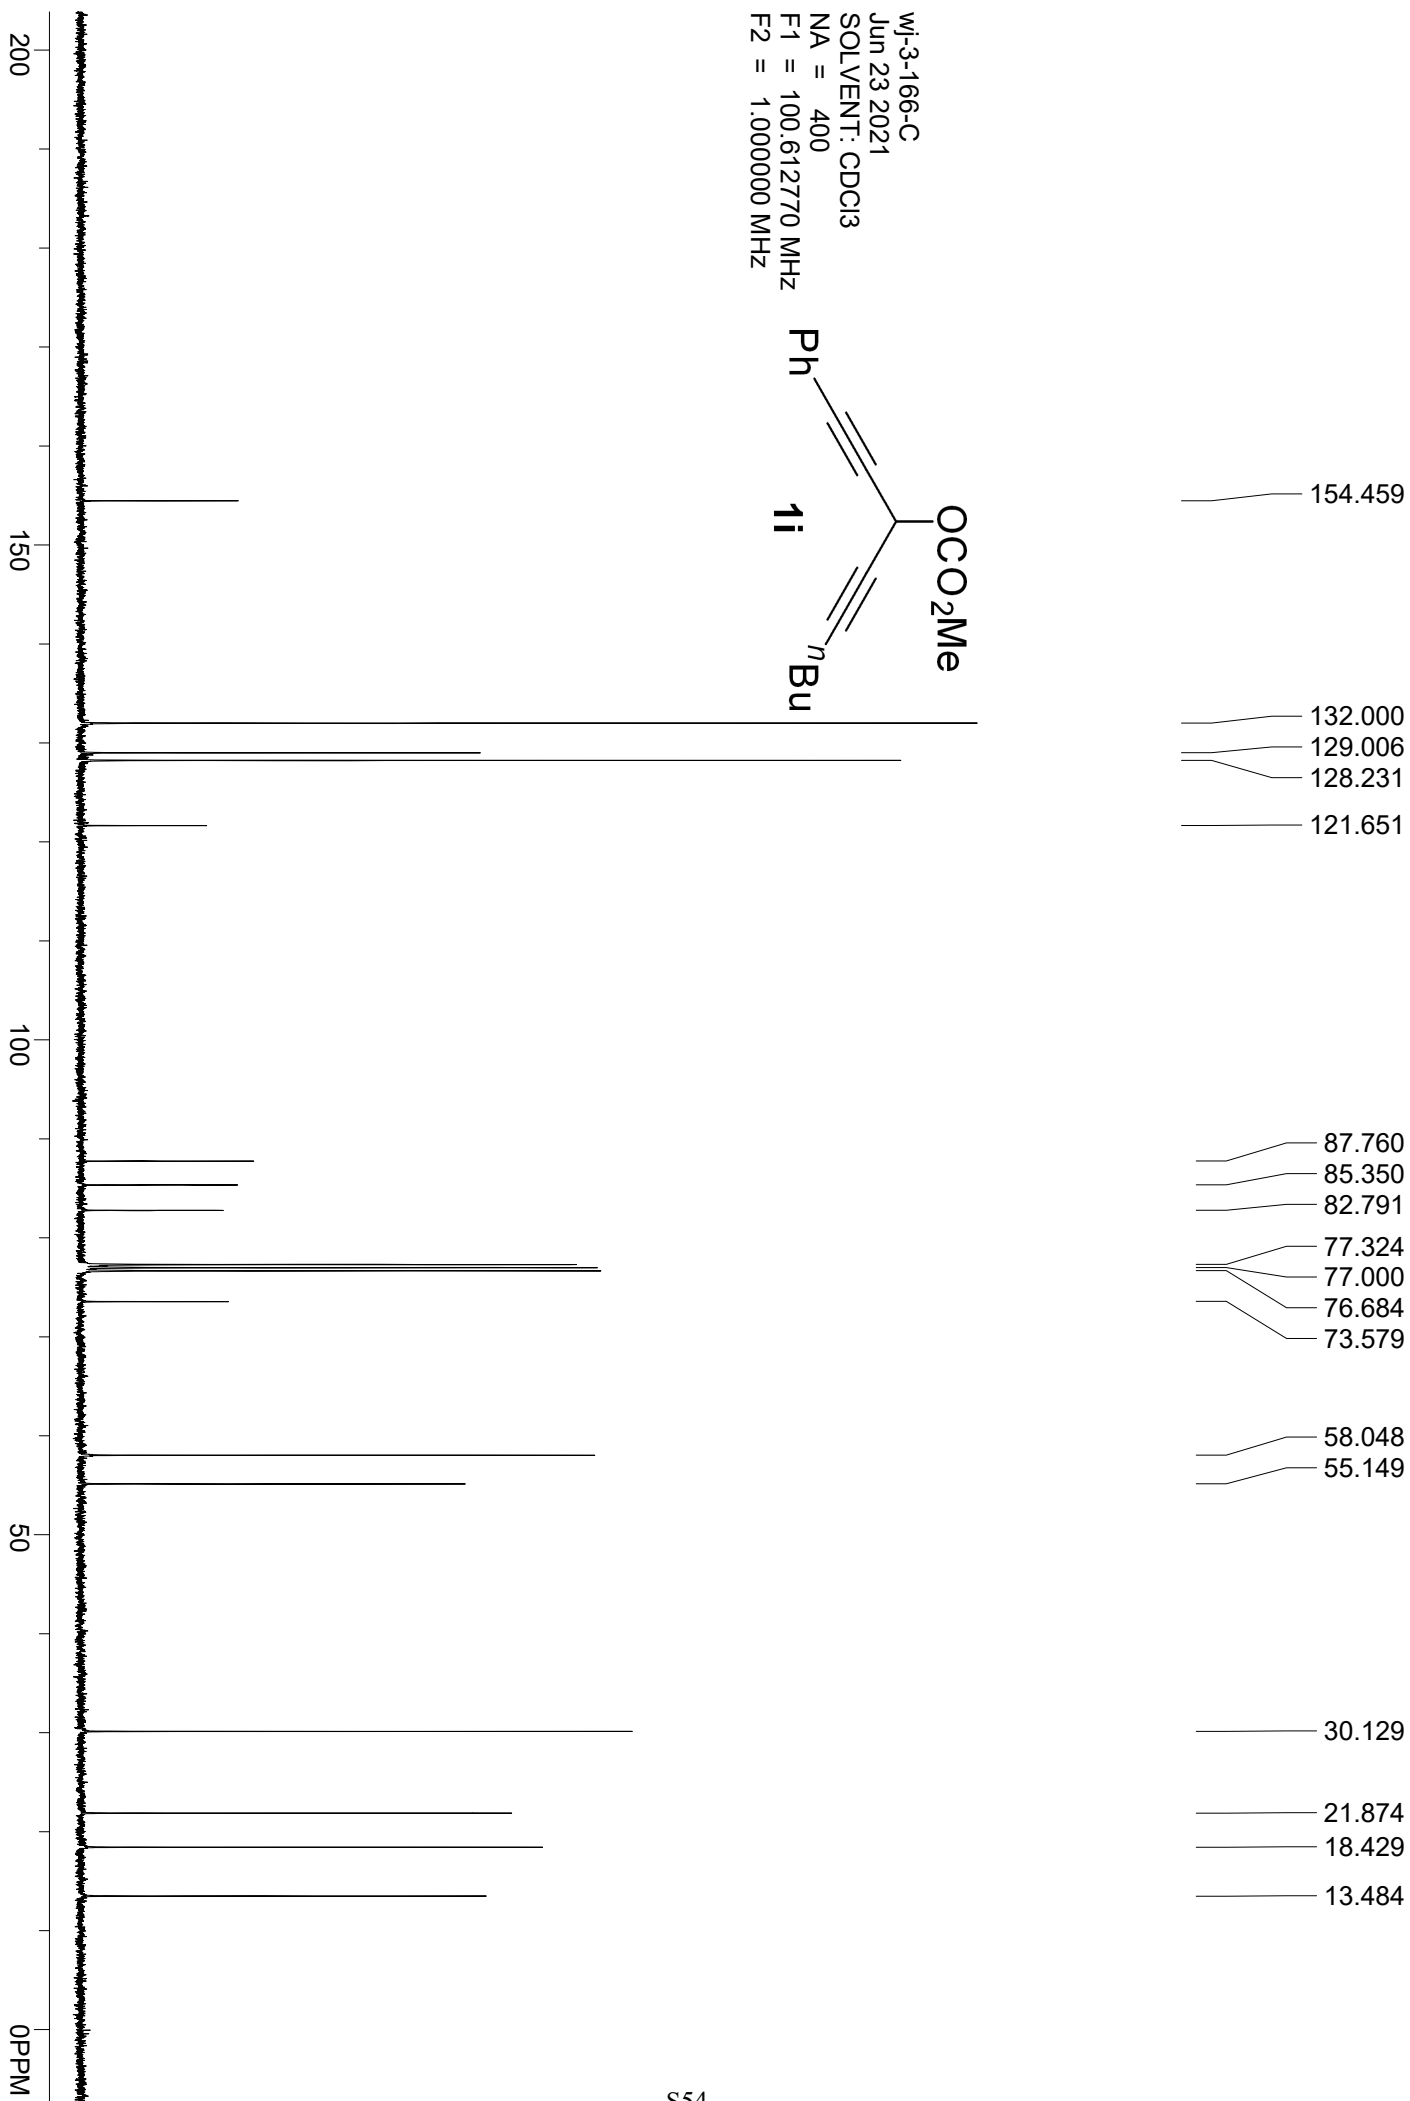

wj-3-015-H  
Mar 11 2021  
SOLVENT: CDCl3  
NA = 4  
F1 = 400.130005 MHz  
F2 = 1.000000 MHz

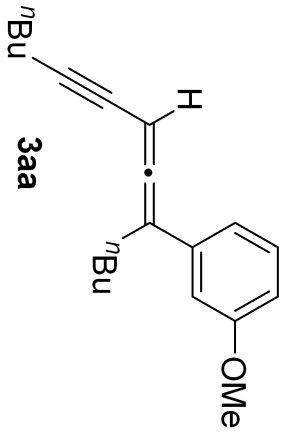

7.262  
7.257  
7.243  
7.223  
7.004  
6.984  
6.937  
6.789  
6.784  
6.768  
6.764  
5.713

2.472  
3.813  
2.464  
2.454  
2.445  
2.435  
2.426  
2.417  
2.324  
2.320  
2.307  
2.303  
2.289  
2.285  
1.575  
1.554  
1.536  
1.517  
1.497  
1.479  
1.460  
1.442  
1.423  
1.404  
1.386  
1.369  
0.952  
0.932  
0.912  
0.893  
-0.000

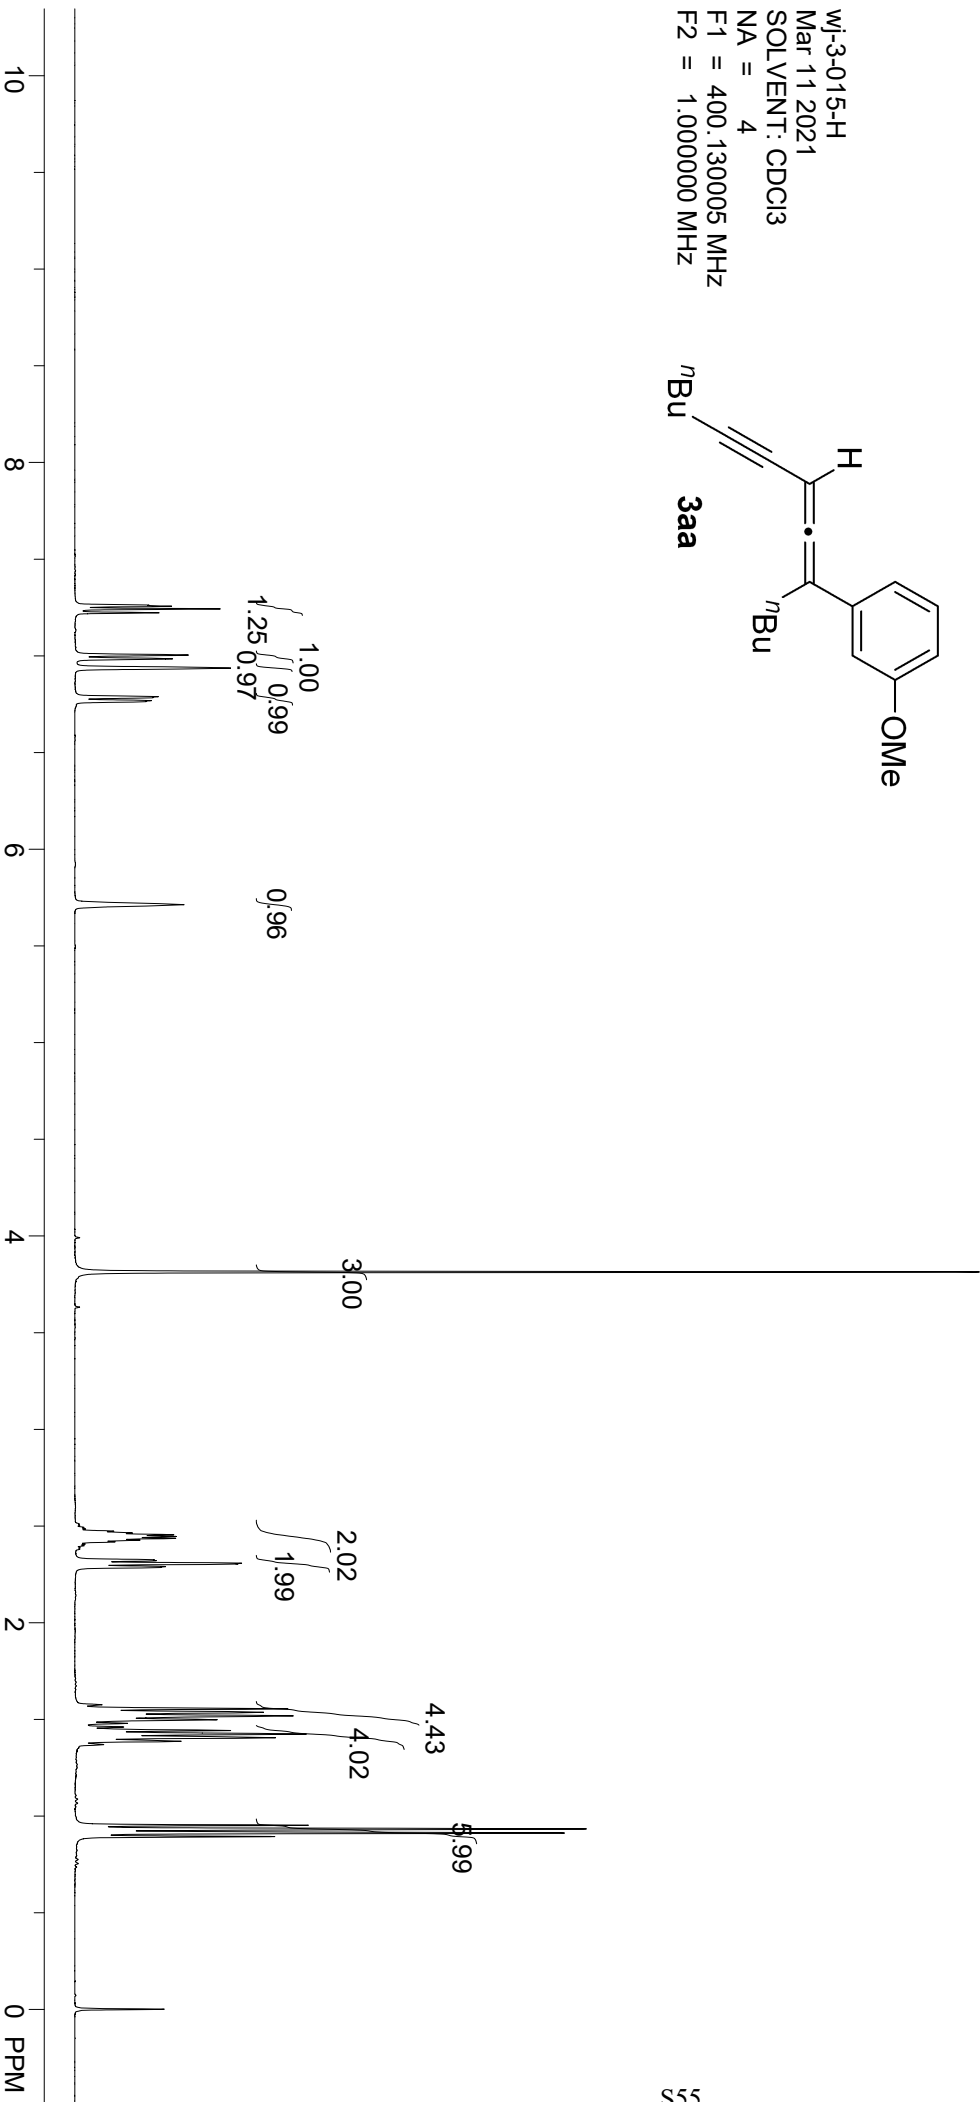

wj-3-015-C  
Mar 11 2021  
SOLVENT: CDCl3  
NA = 250  
F1 = 100.612770 MHz  
F2 = 1.000000 MHz

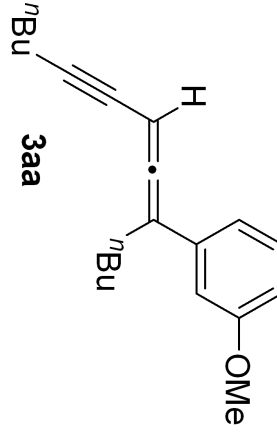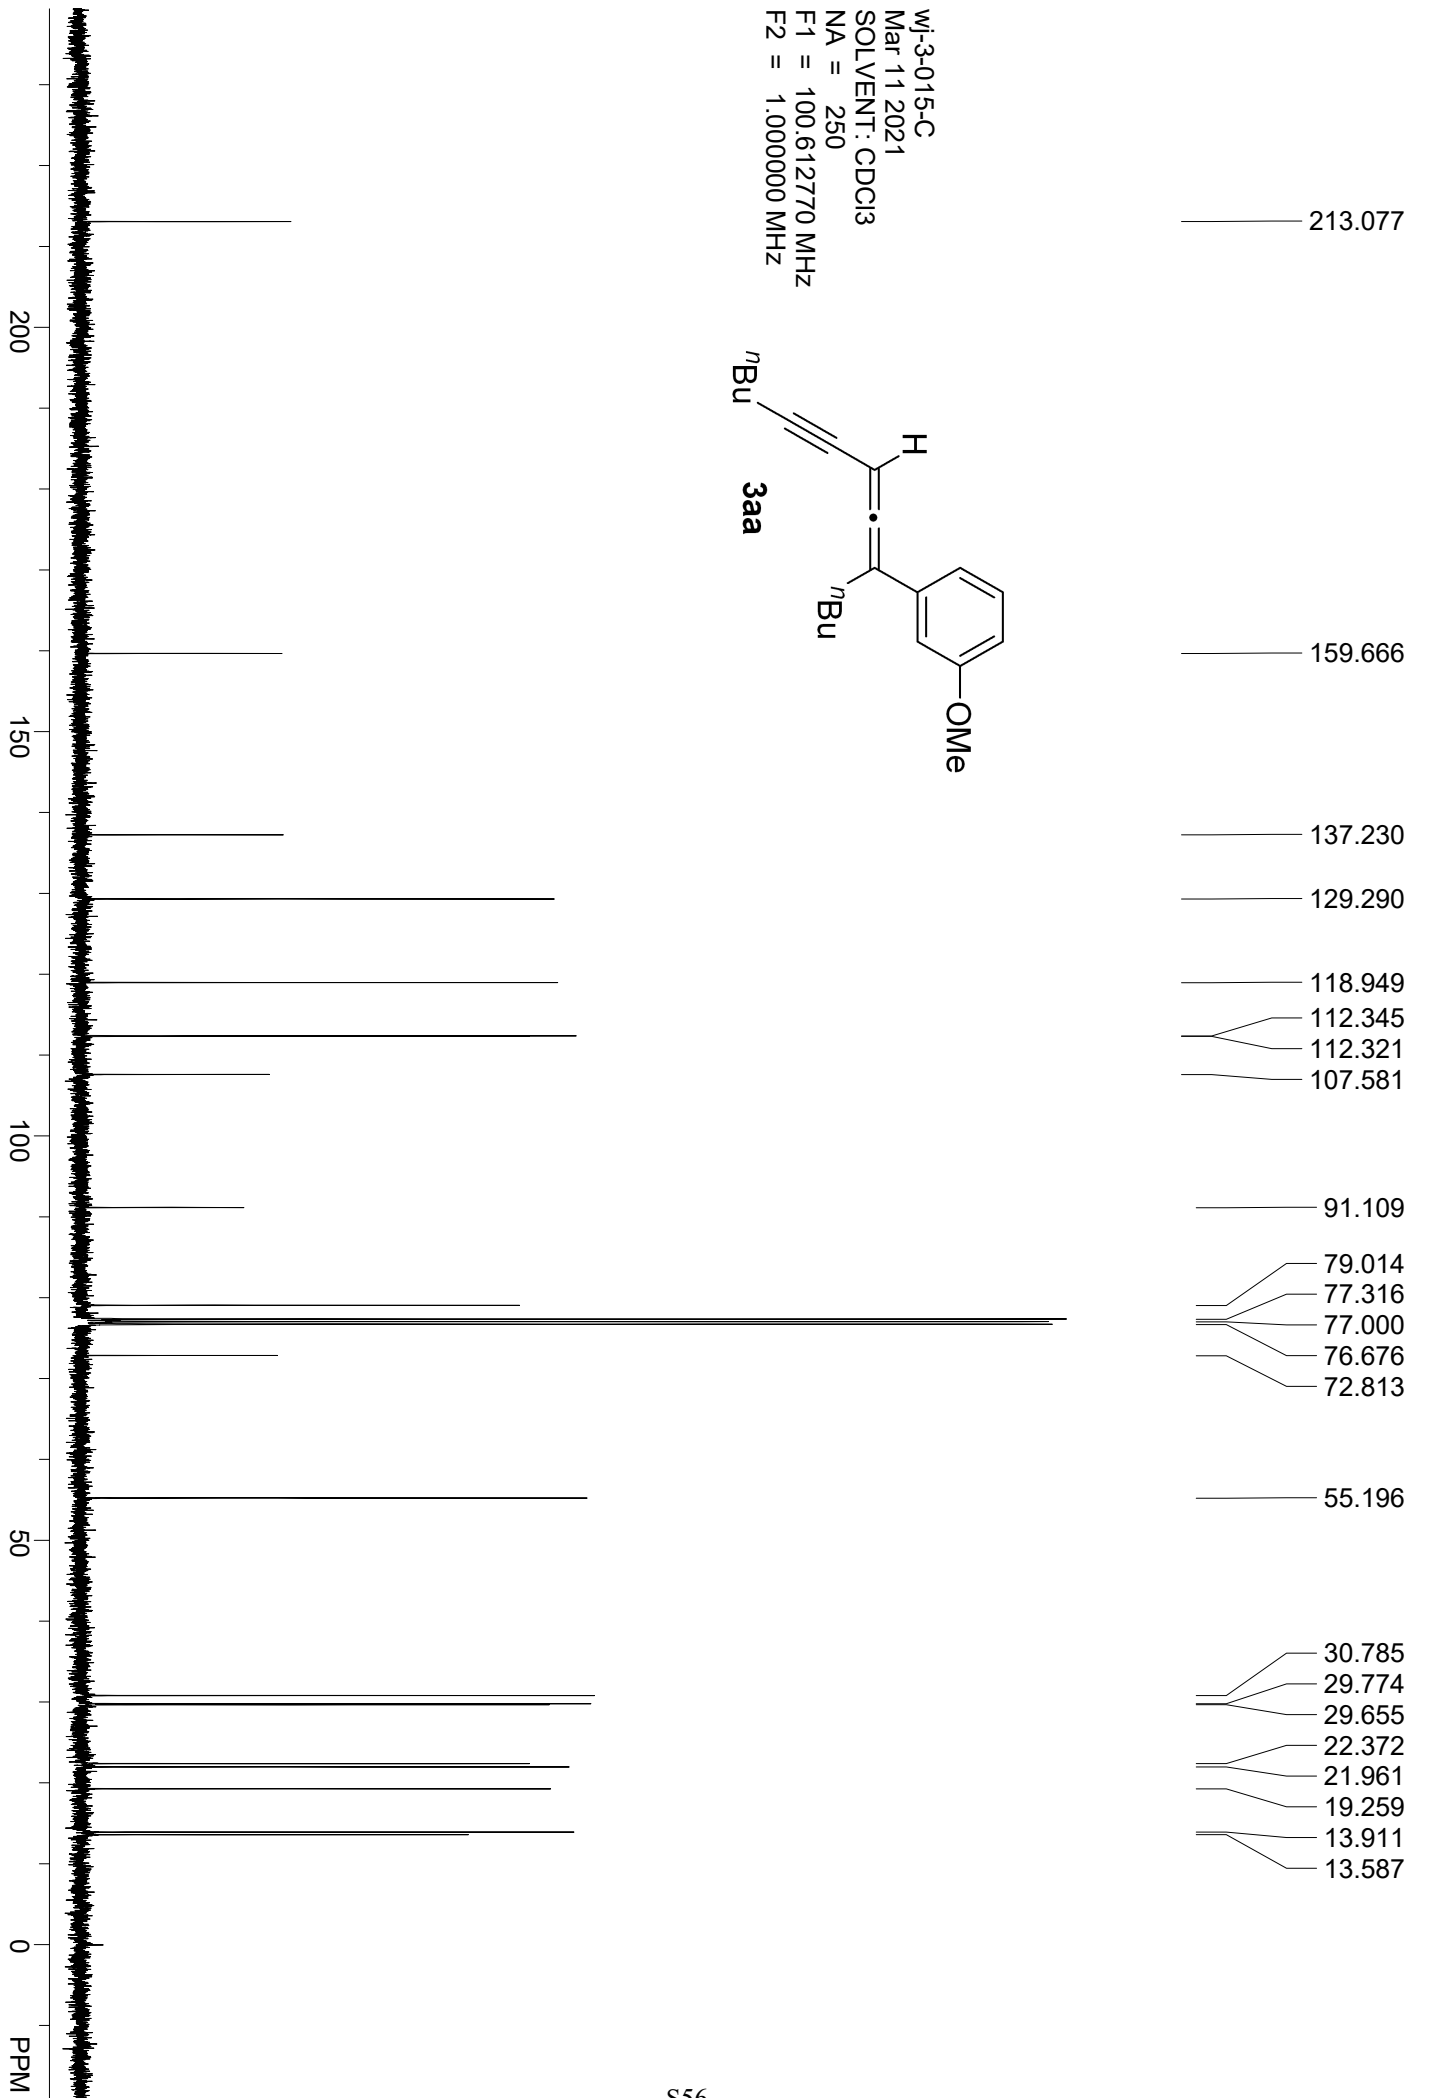

wj-3-044-H  
Mar 27 2021  
SOLVENT: CDCl3  
NA = 4  
F1 = 400.130005 MHz  
F2 = 1.000000 MHz

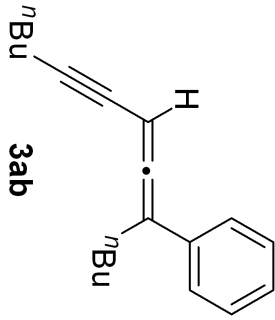

7.400  
7.381  
7.339  
7.320  
7.301  
7.234  
7.215  
7.197

5.718

2.489  
2.480  
2.471  
2.462  
2.452  
2.443  
2.434  
2.324  
2.321  
2.307  
2.304  
2.290  
2.286  
1.581  
1.563  
1.544  
1.527  
1.517  
1.497  
1.480  
1.447  
1.441  
1.424  
1.408  
1.389  
1.370  
0.954  
0.936  
0.929  
0.918  
0.910  
0.892  
0.000

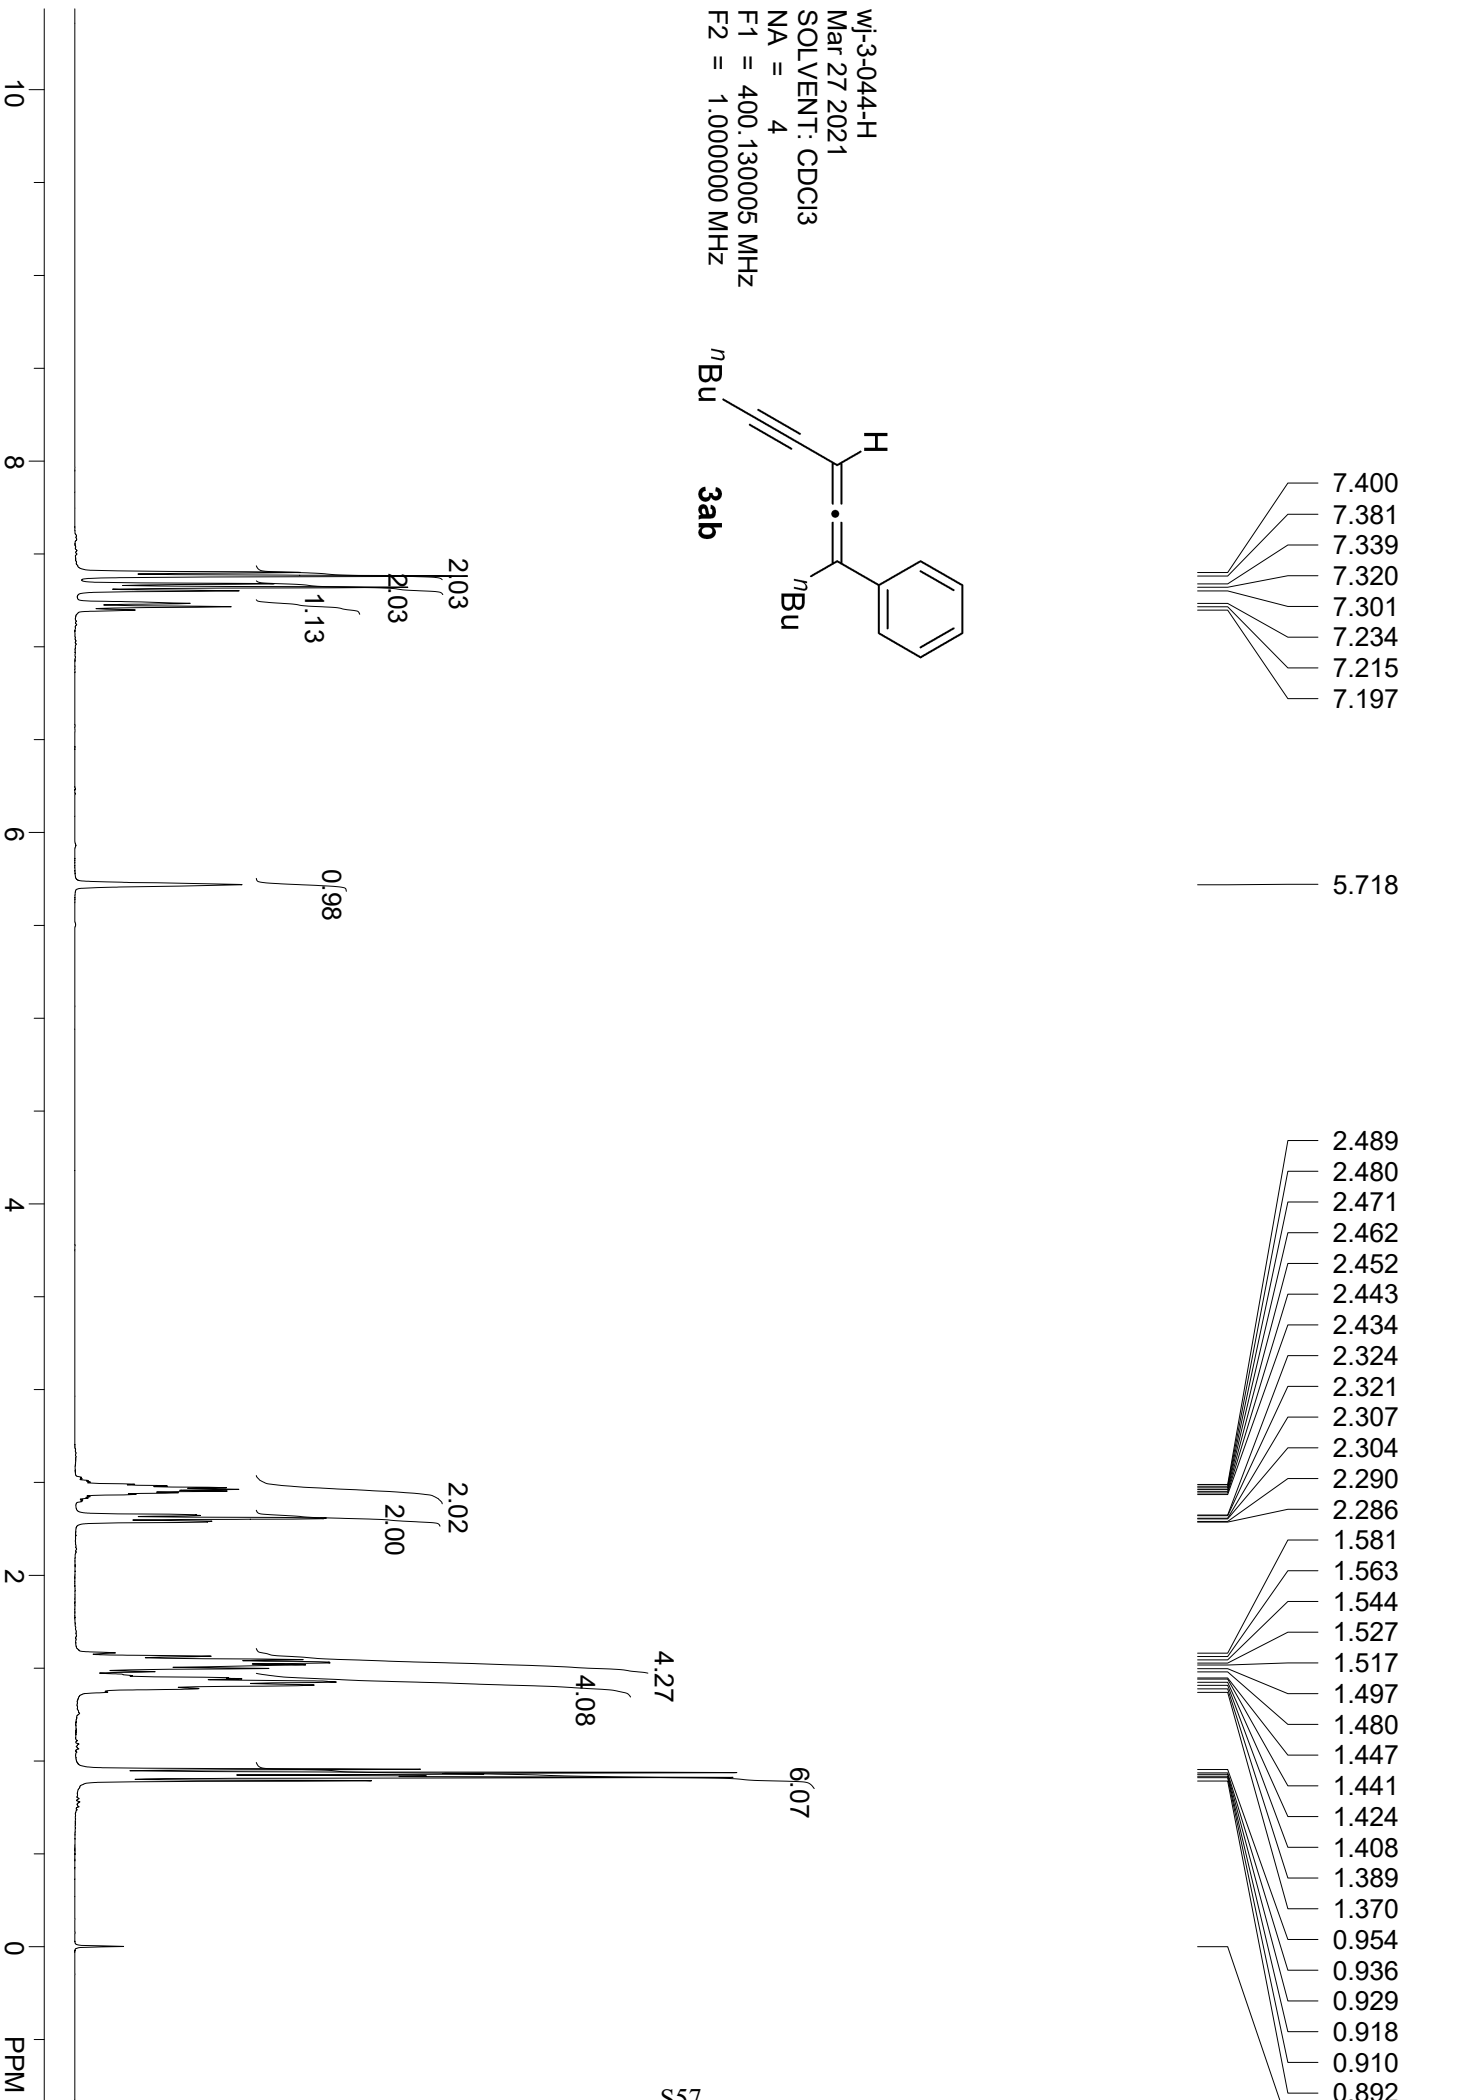

wj-3-044-C  
Mar 27 2021  
SOLVENT: CDCl3  
NA = 250  
F1 = 100.612770 MHz  
F2 = 1.000000 MHz

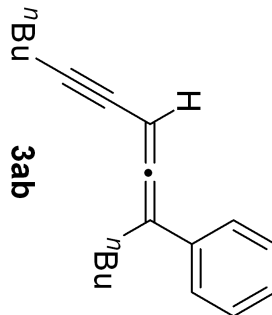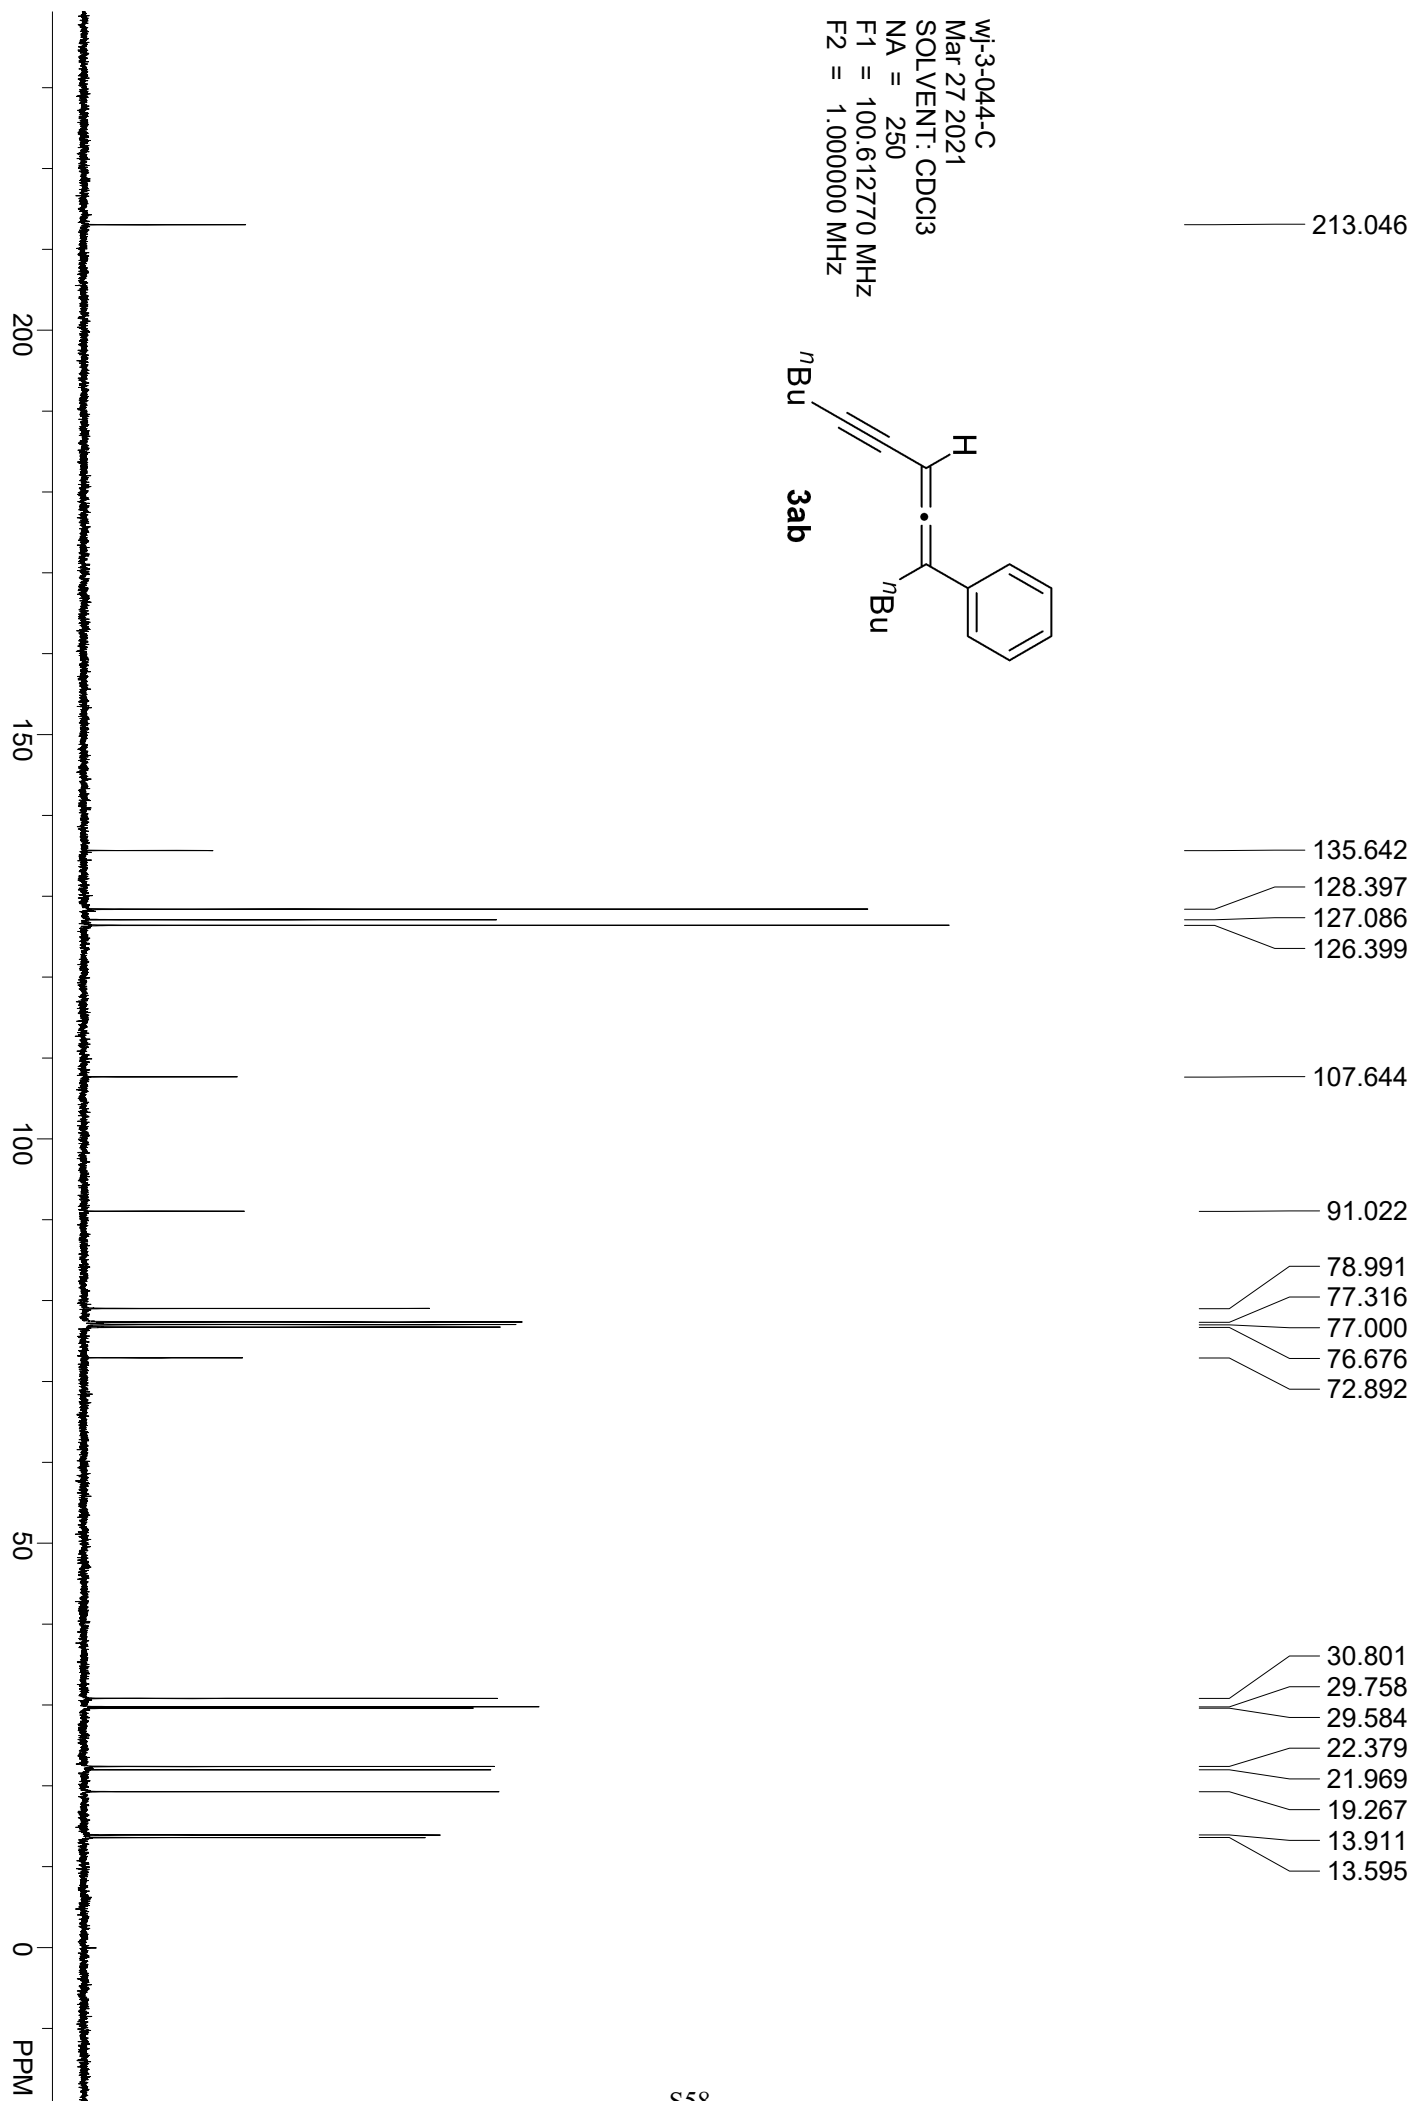

wj-3-043-H  
Mar 26 2021  
SOLVENT: CDCl3  
NA = 4  
F1 = 400.130005 MHz  
F2 = 1.000000 MHz

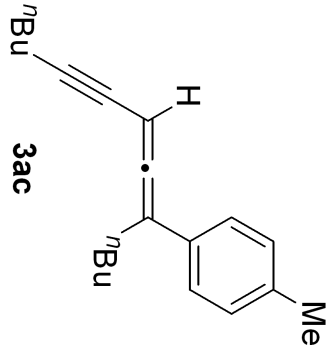

- 7.287
- 7.267
- 7.243
- 7.138
- 7.119

5.695

- 2.482
- 2.468
- 2.460
- 2.450
- 2.442
- 2.432
- 2.423
- 2.414
- 2.402
- 2.329
- 2.302
- 2.284
- 1.569
- 1.550
- 1.532
- 1.513
- 1.494
- 1.475
- 1.455
- 1.438
- 1.419
- 1.401
- 1.382
- 1.365
- 0.947
- 0.928
- 0.908
- 0.890
- 0.000

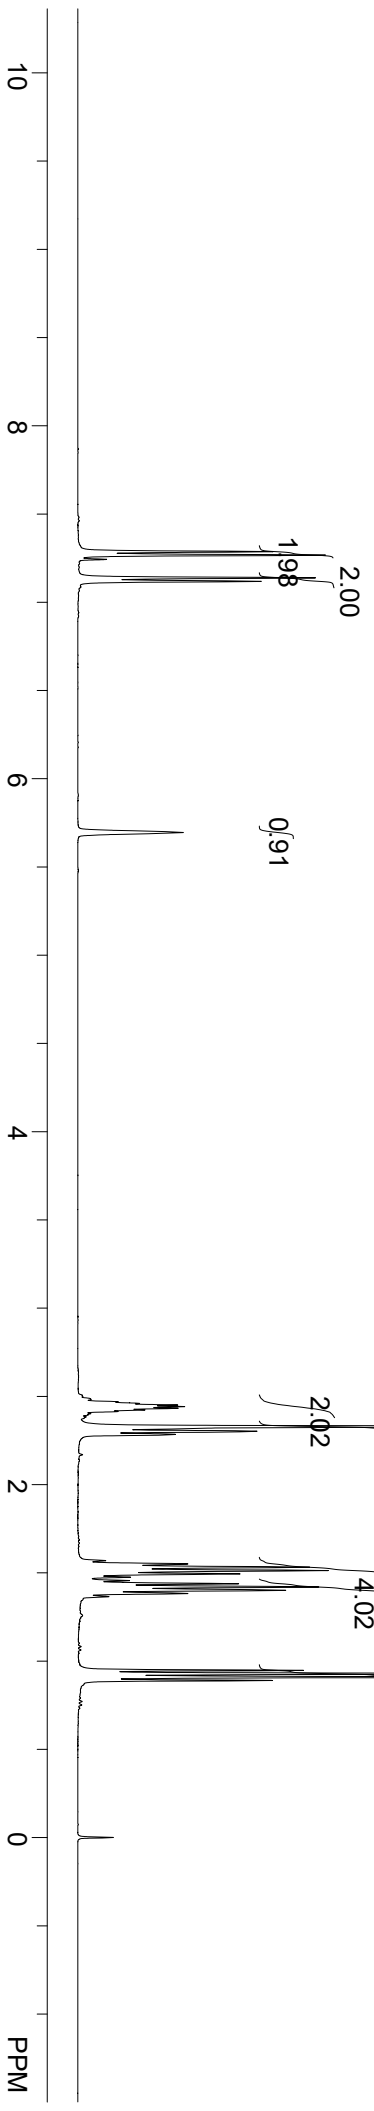

wf-3-043-C  
Mar 26 2021  
SOLVENT: CDCl3  
NA = 300  
F1 = 100.612770 MHz  
F2 = 1.000000 MHz

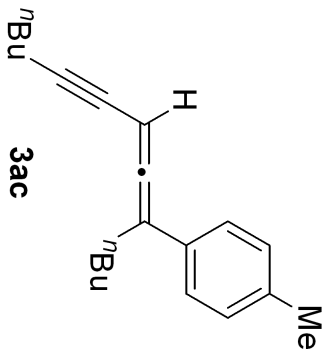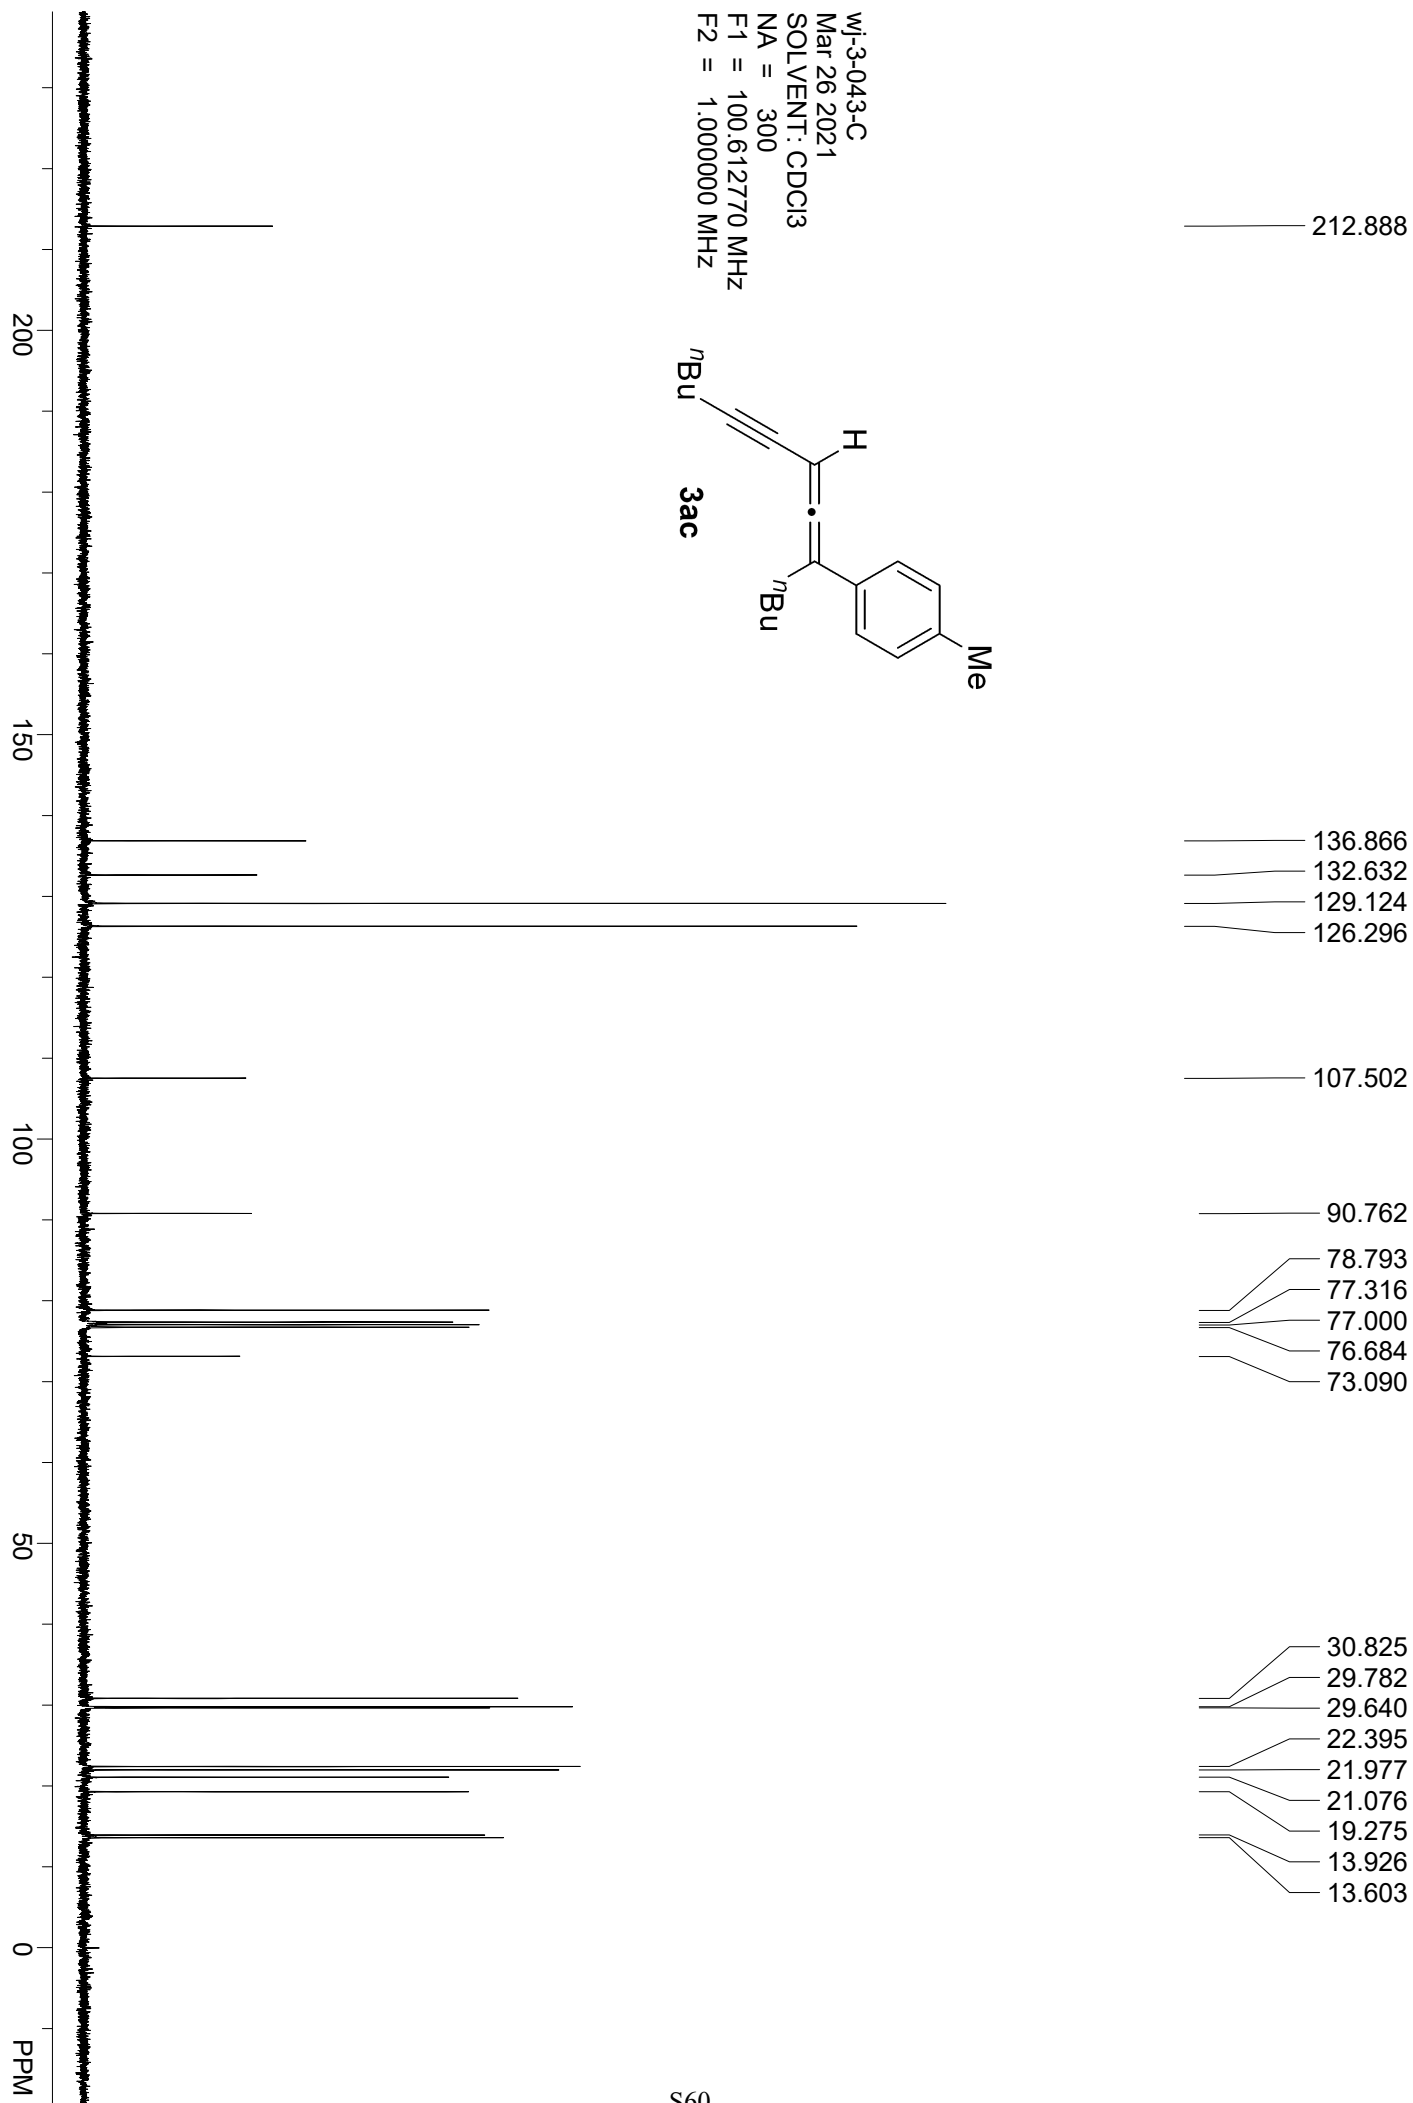



wj-3-016-H  
Mar 11 2021  
SOLVENT: CDCl3  
NA = 4  
F1 = 400.130005 MHz  
F2 = 1.000000 MHz

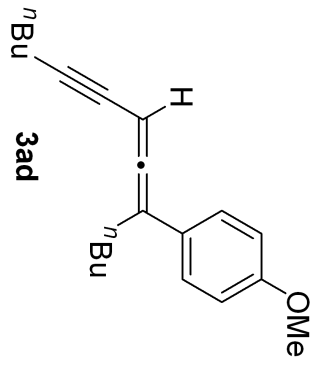

7.324  
7.302  
7.257  
6.878  
6.856

5.696

2.459  
3.803  
2.450  
2.441  
2.432  
2.422  
2.413  
2.404  
2.324  
2.319  
2.307  
2.302  
2.289  
2.284  
1.557  
1.551  
1.533  
1.514  
1.496  
1.479  
1.458  
1.440  
1.422  
1.403  
1.385  
1.368  
0.950  
0.931  
0.911  
0.893  
0.000

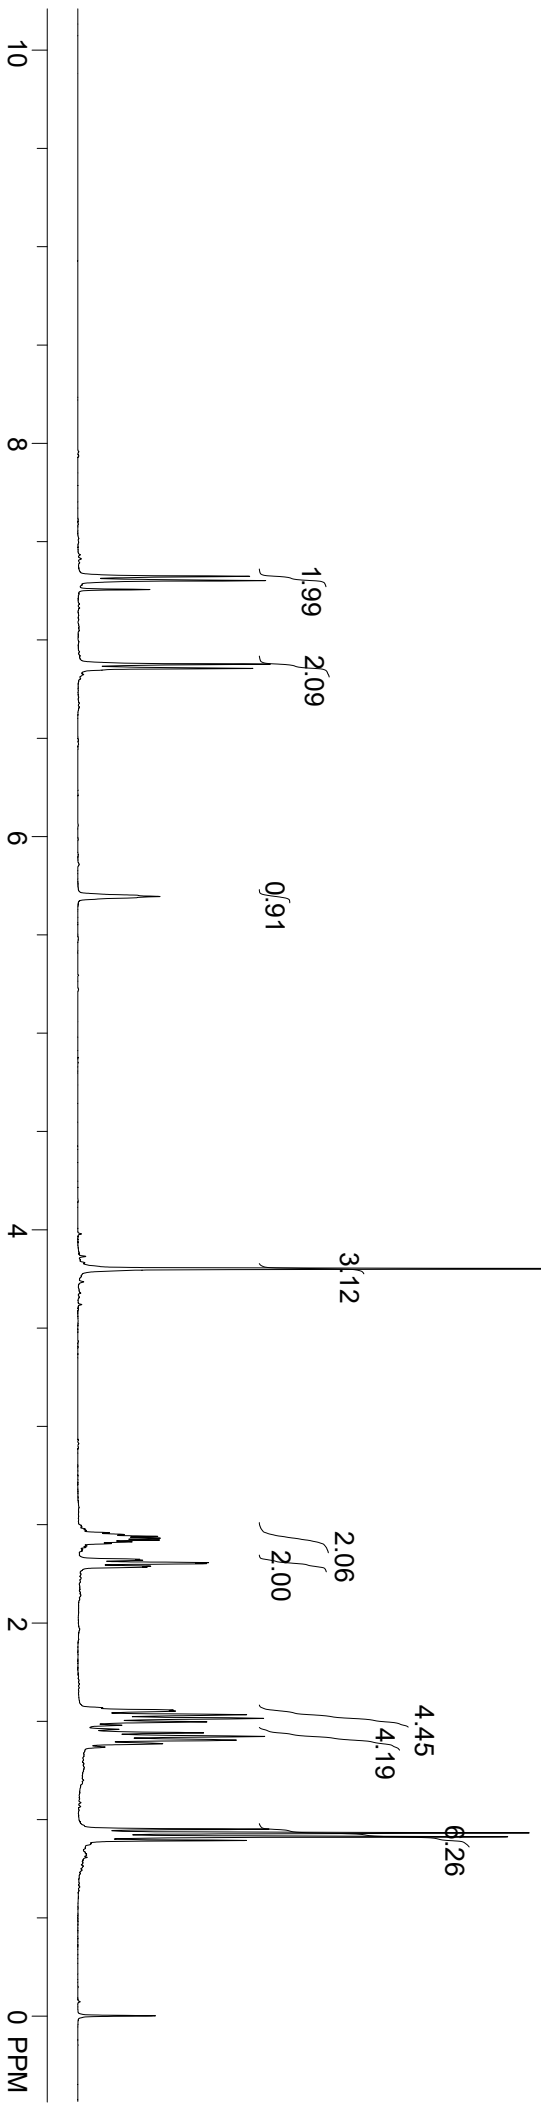

wj-3-016-C  
Mar 11 2021  
SOLVENT: CDCl3  
NA = 250  
F1 = 100.612770 MHz  
F2 = 1.000000 MHz

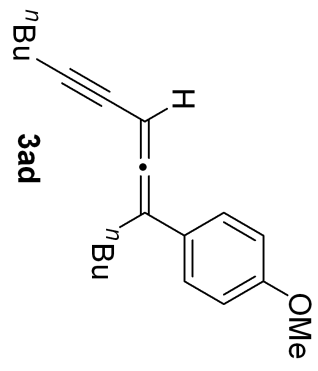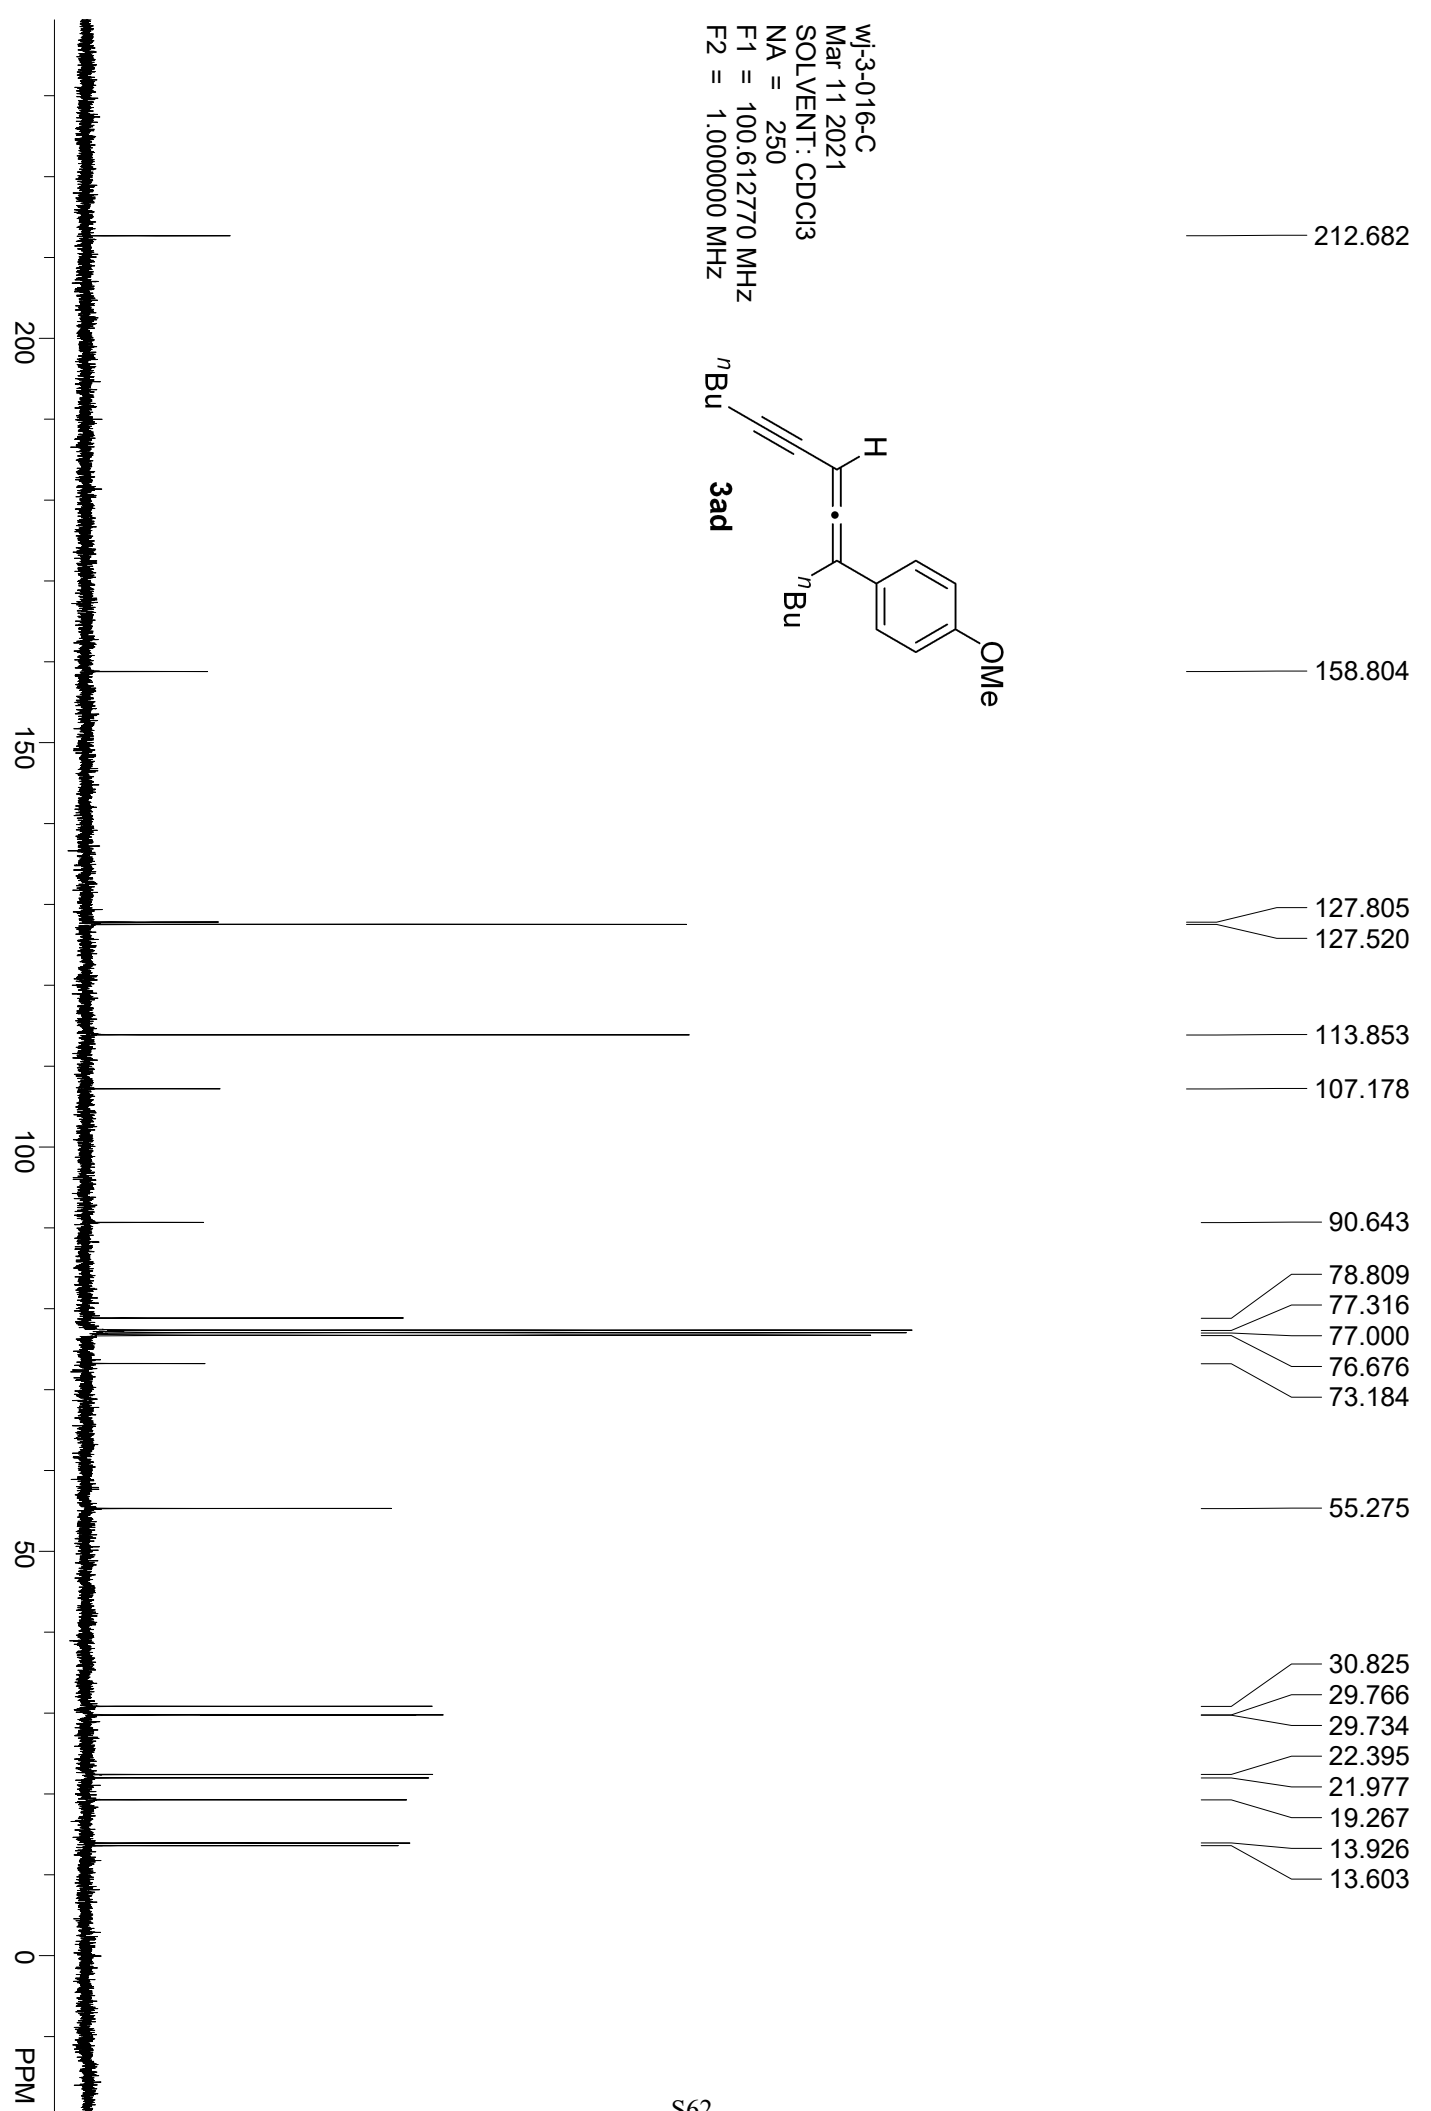

wj-3-030-H  
 Mar 19 2021  
 SOLVENT: CDCl3  
 NA = 4  
 F1 = 400.130005 MHz  
 F2 = 1.000000 MHz

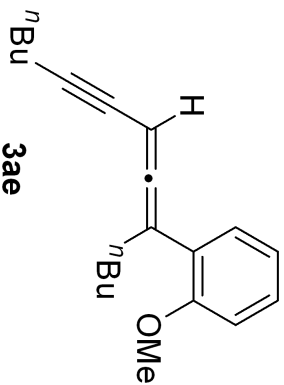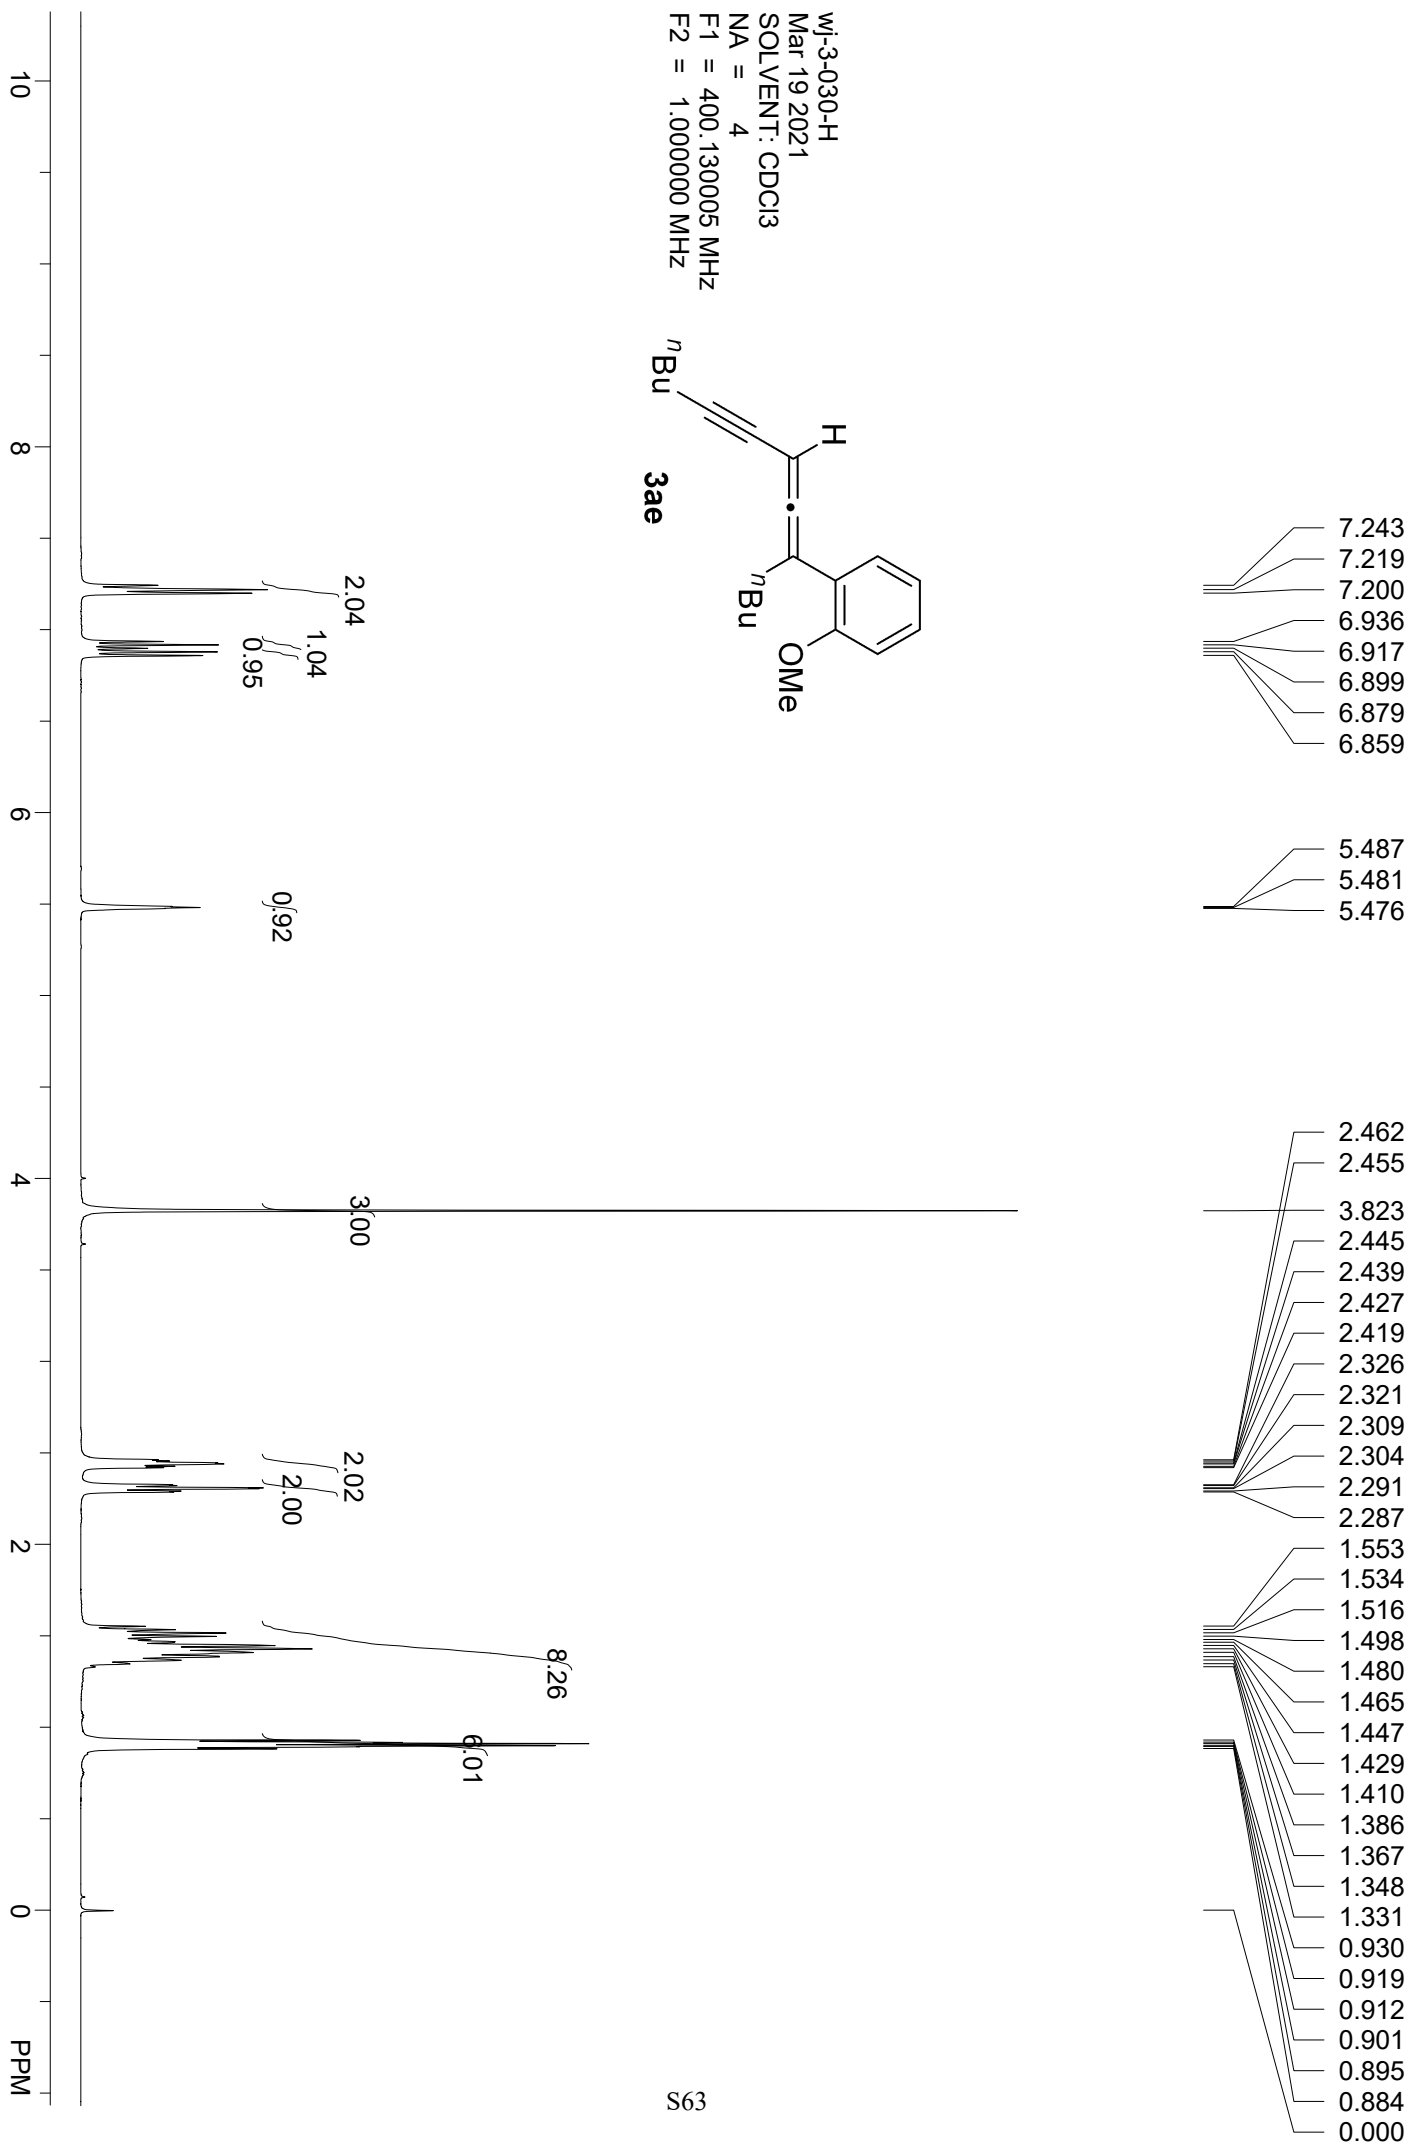

212.588  
 156.901  
 129.606  
 128.461  
 125.925  
 120.576  
 111.286  
 105.108  
 90.430  
 77.316  
 77.000  
 76.684  
 75.720  
 73.642  
 55.599  
 31.773  
 30.872  
 29.821  
 22.261  
 21.953  
 19.291  
 13.895  
 13.595

WJ-3-030-C  
 Mar 19 2021  
 SOLVENT: CDCl3  
 NA = 300  
 F1 = 100.612770 MHz  
 F2 = 1.000000 MHz

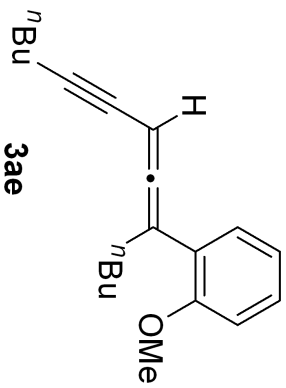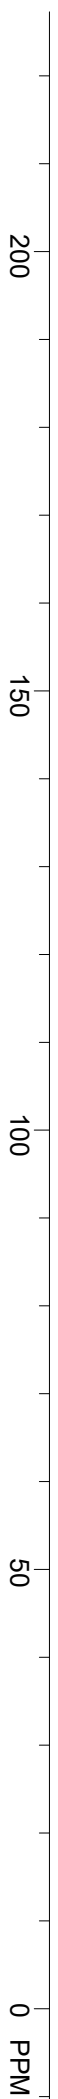

- 7.601
- 7.582
- 7.575
- 7.554
- 7.473
- 7.452
- 7.434
- 7.415
- 7.355
- 7.336
- 7.318
- 7.250
- 5.763
- 5.757
- 5.751

- 2.527
- 2.518
- 2.508
- 2.500
- 2.489
- 2.480
- 2.471
- 2.338
- 2.333
- 2.321
- 2.315
- 2.303
- 2.298
- 1.611
- 1.594
- 1.575
- 1.556
- 1.545
- 1.527
- 1.507
- 1.489
- 1.469
- 1.450
- 1.431
- 1.412
- 1.394
- 0.970
- 0.952
- 0.934
- 0.916
- 0.898
- 0.000

wj-3-017-H  
 Mar 12 2021  
 SOLVENT: CDCl3  
 NA = 4  
 F1 = 400.130005 MHz  
 F2 = 1.000000 MHz

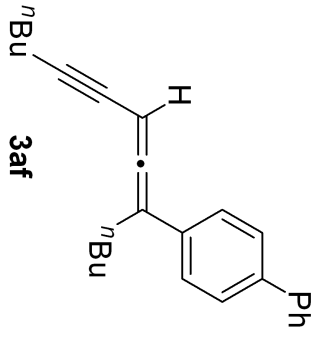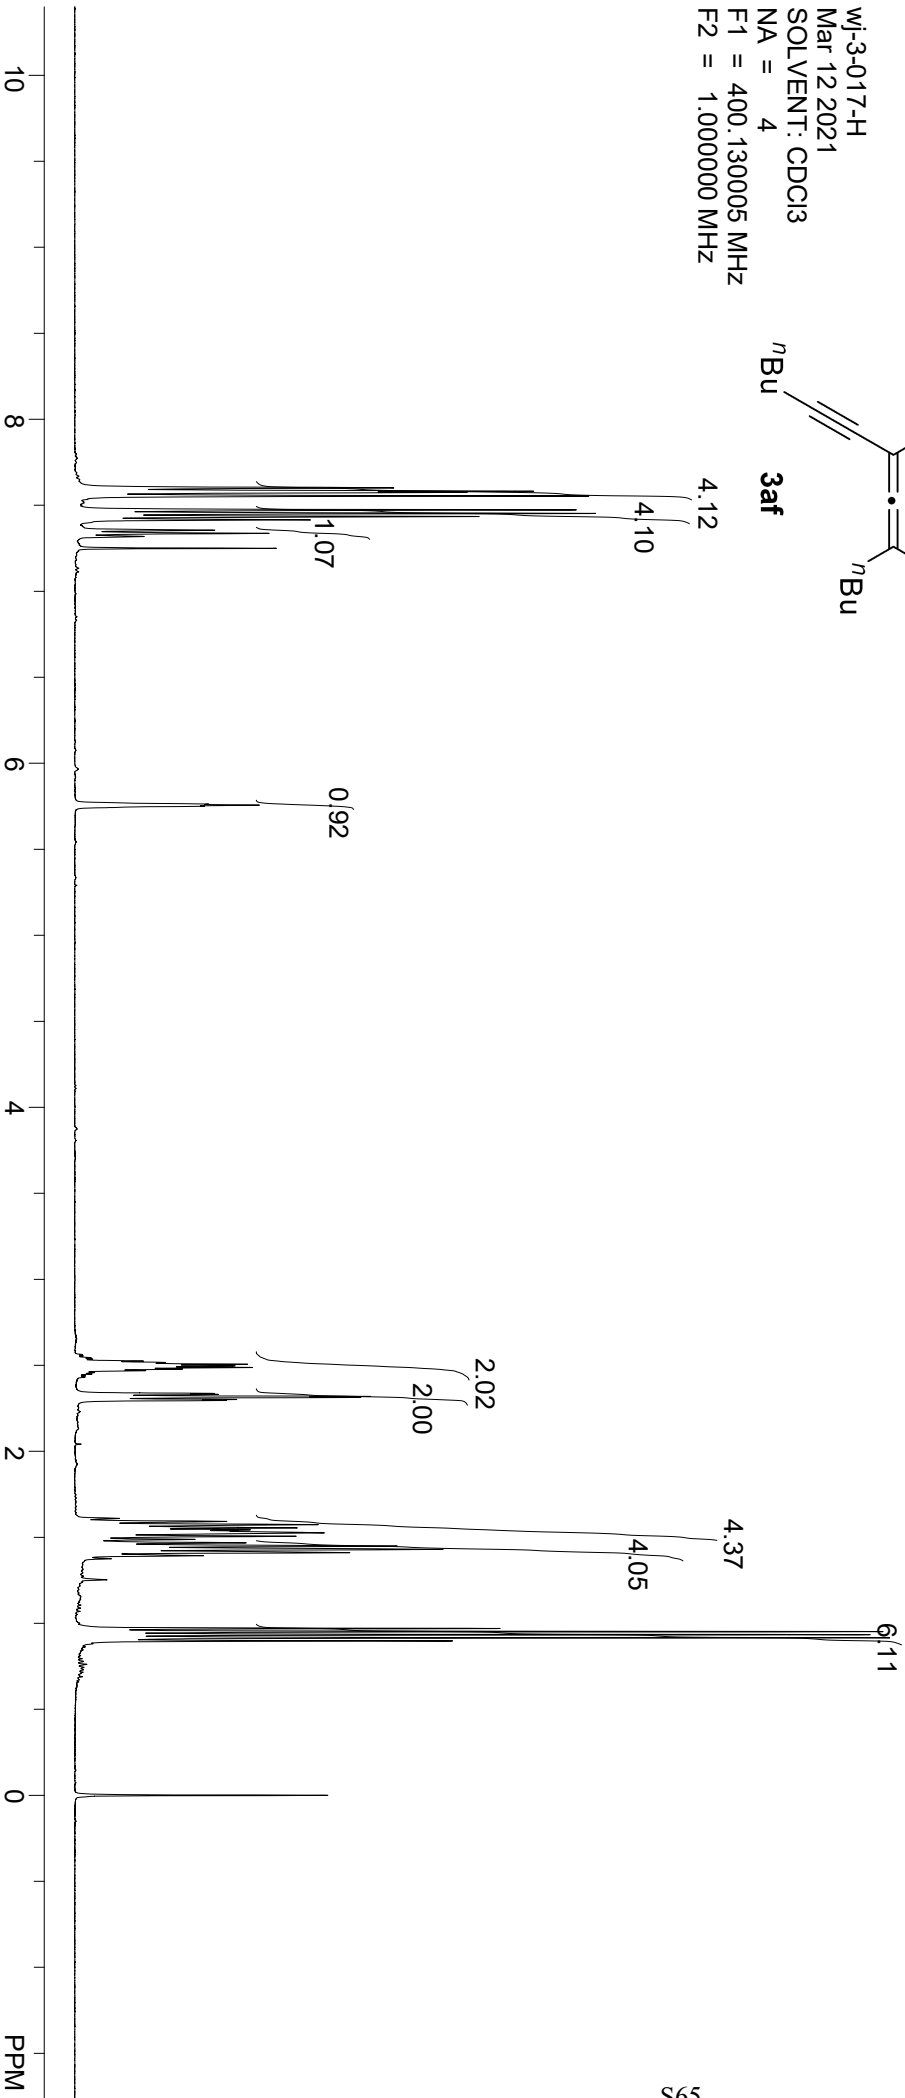

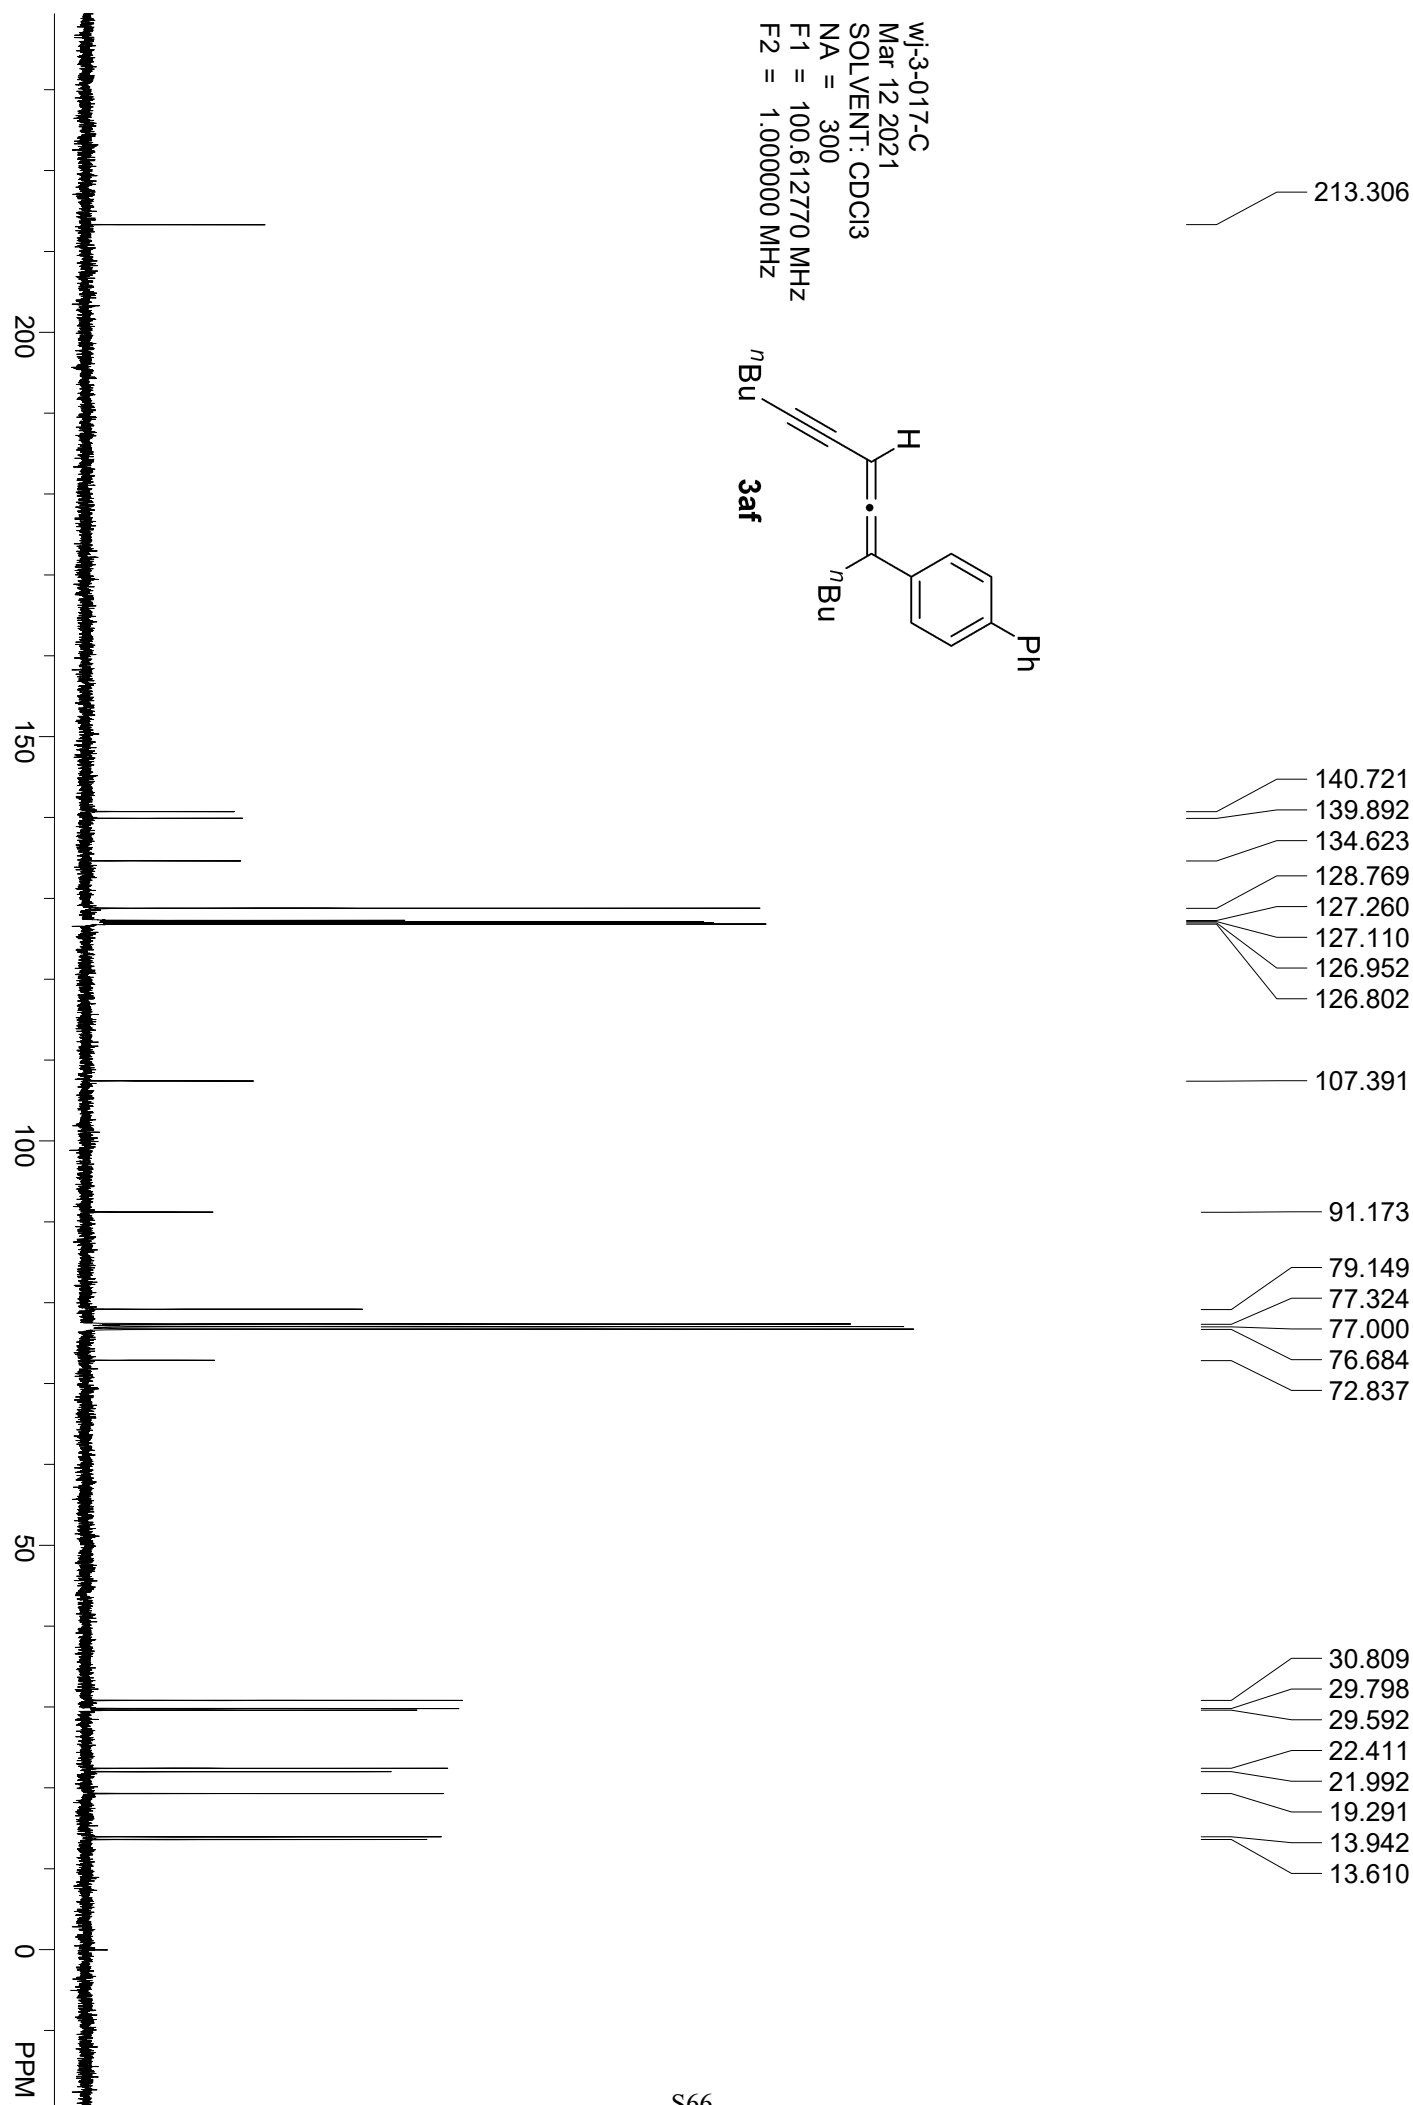

wf-3-018-H  
Mar 13 2021  
SOLVENT: CDCl3  
NA = 4  
F1 = 400.130005 MHz  
F2 = 1.000000 MHz

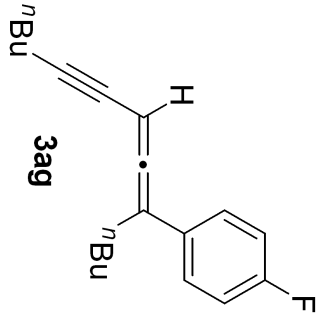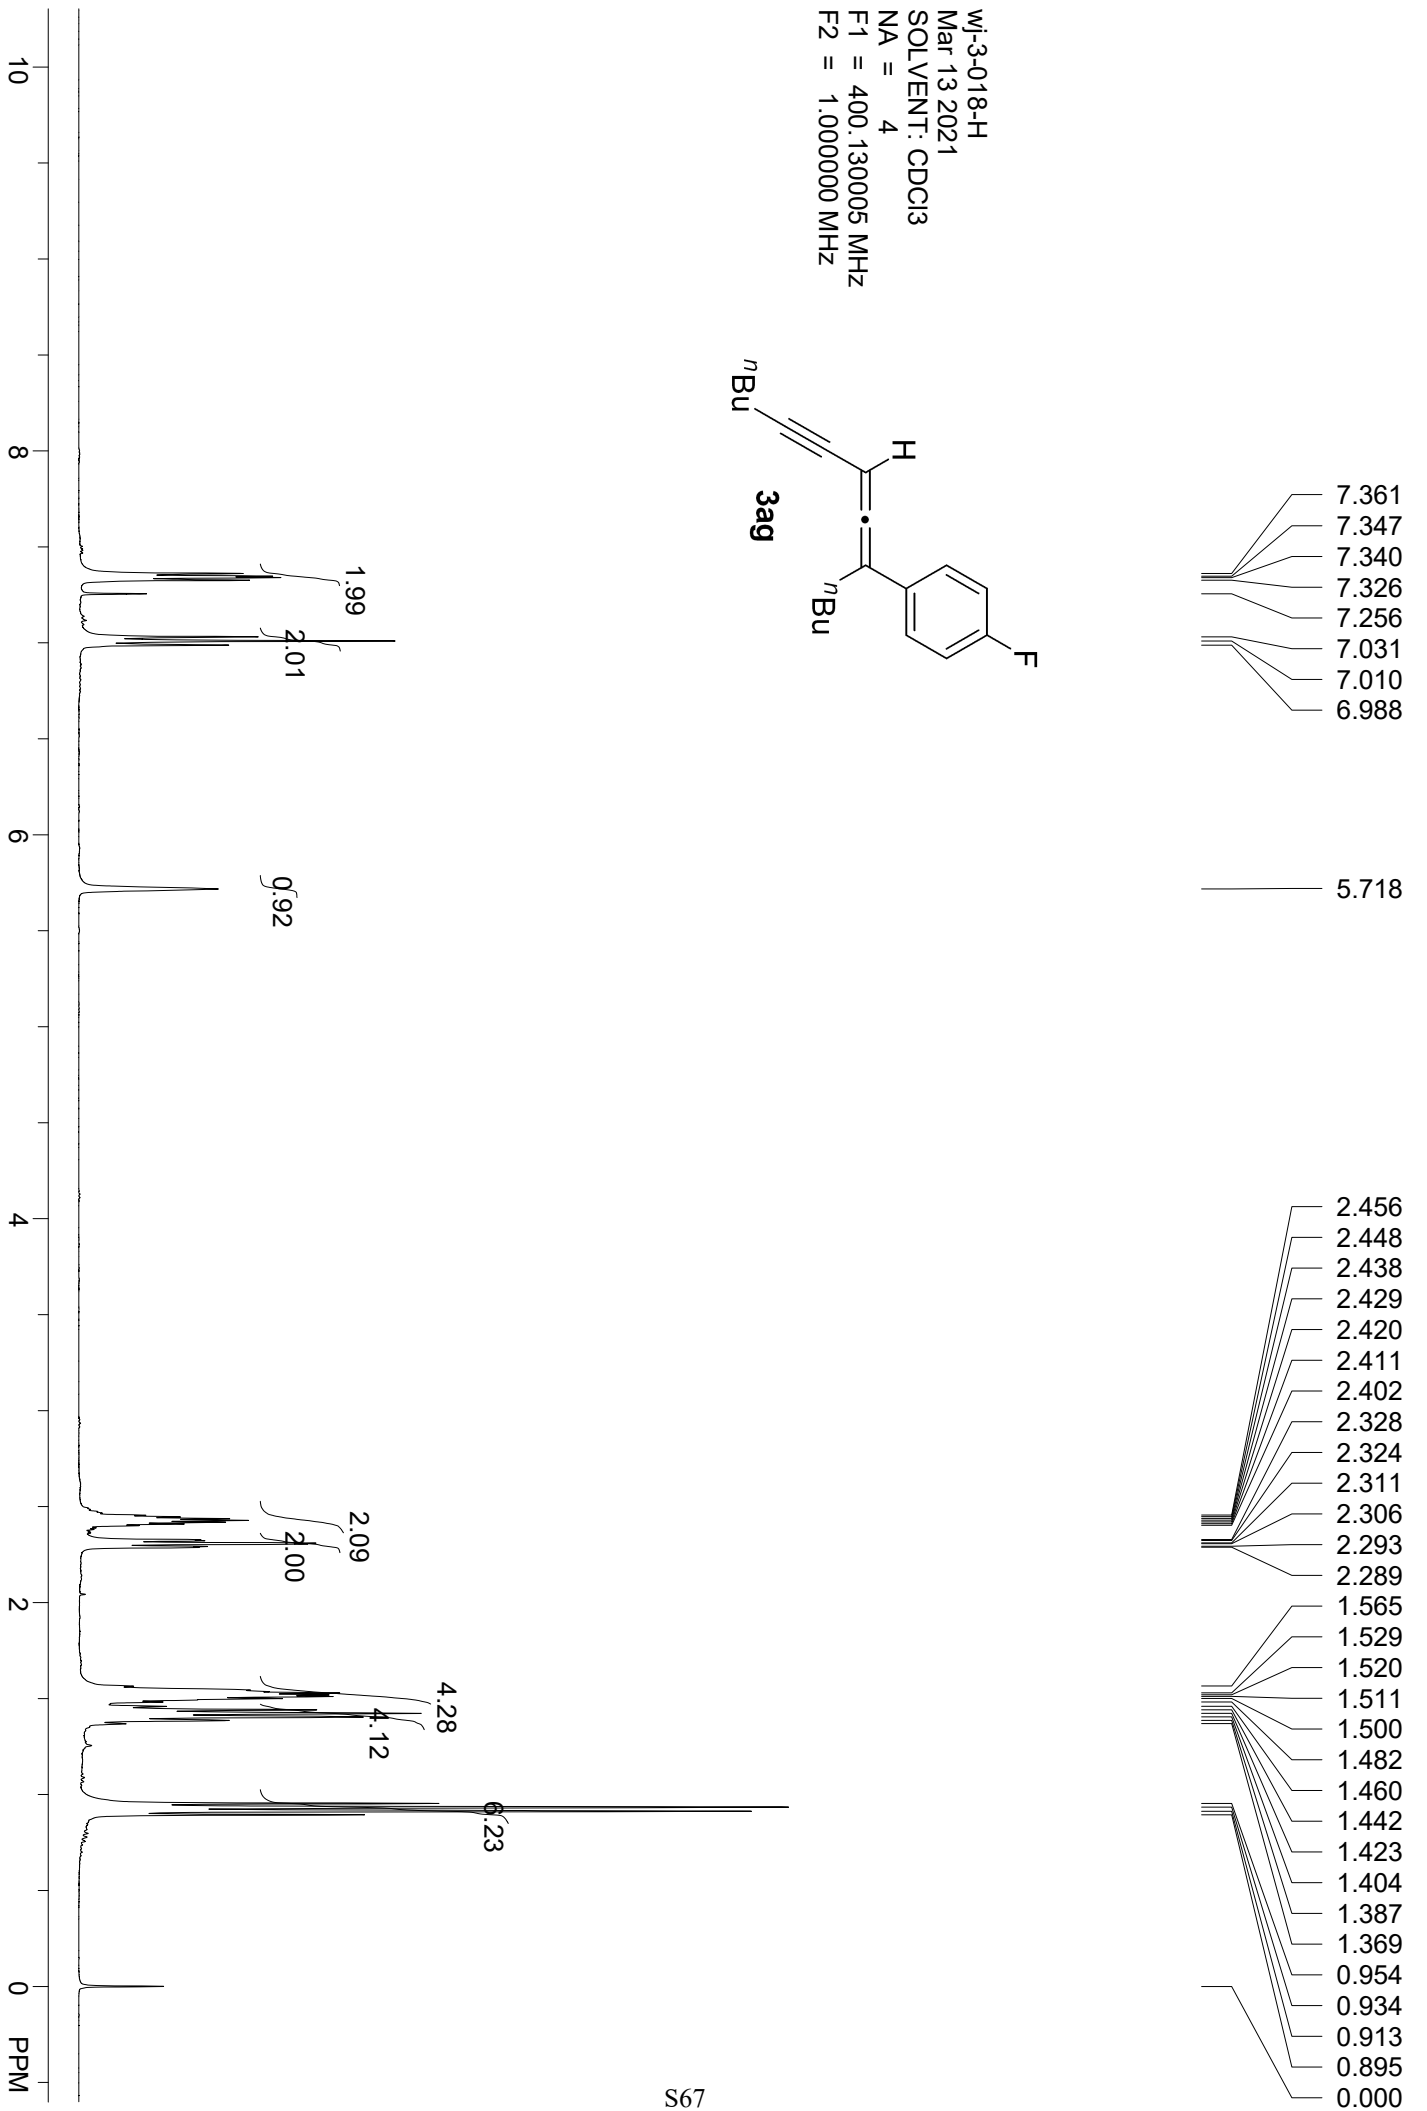

WJ-3-018-C  
Mar 13 2021  
SOLVENT: CDCl3  
NA = 201  
F1 = 100.612770 MHz  
F2 = 1.000000 MHz

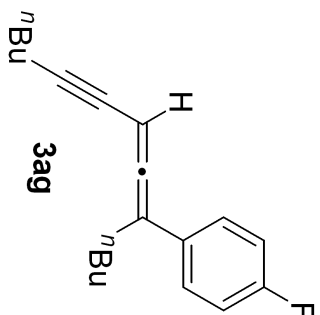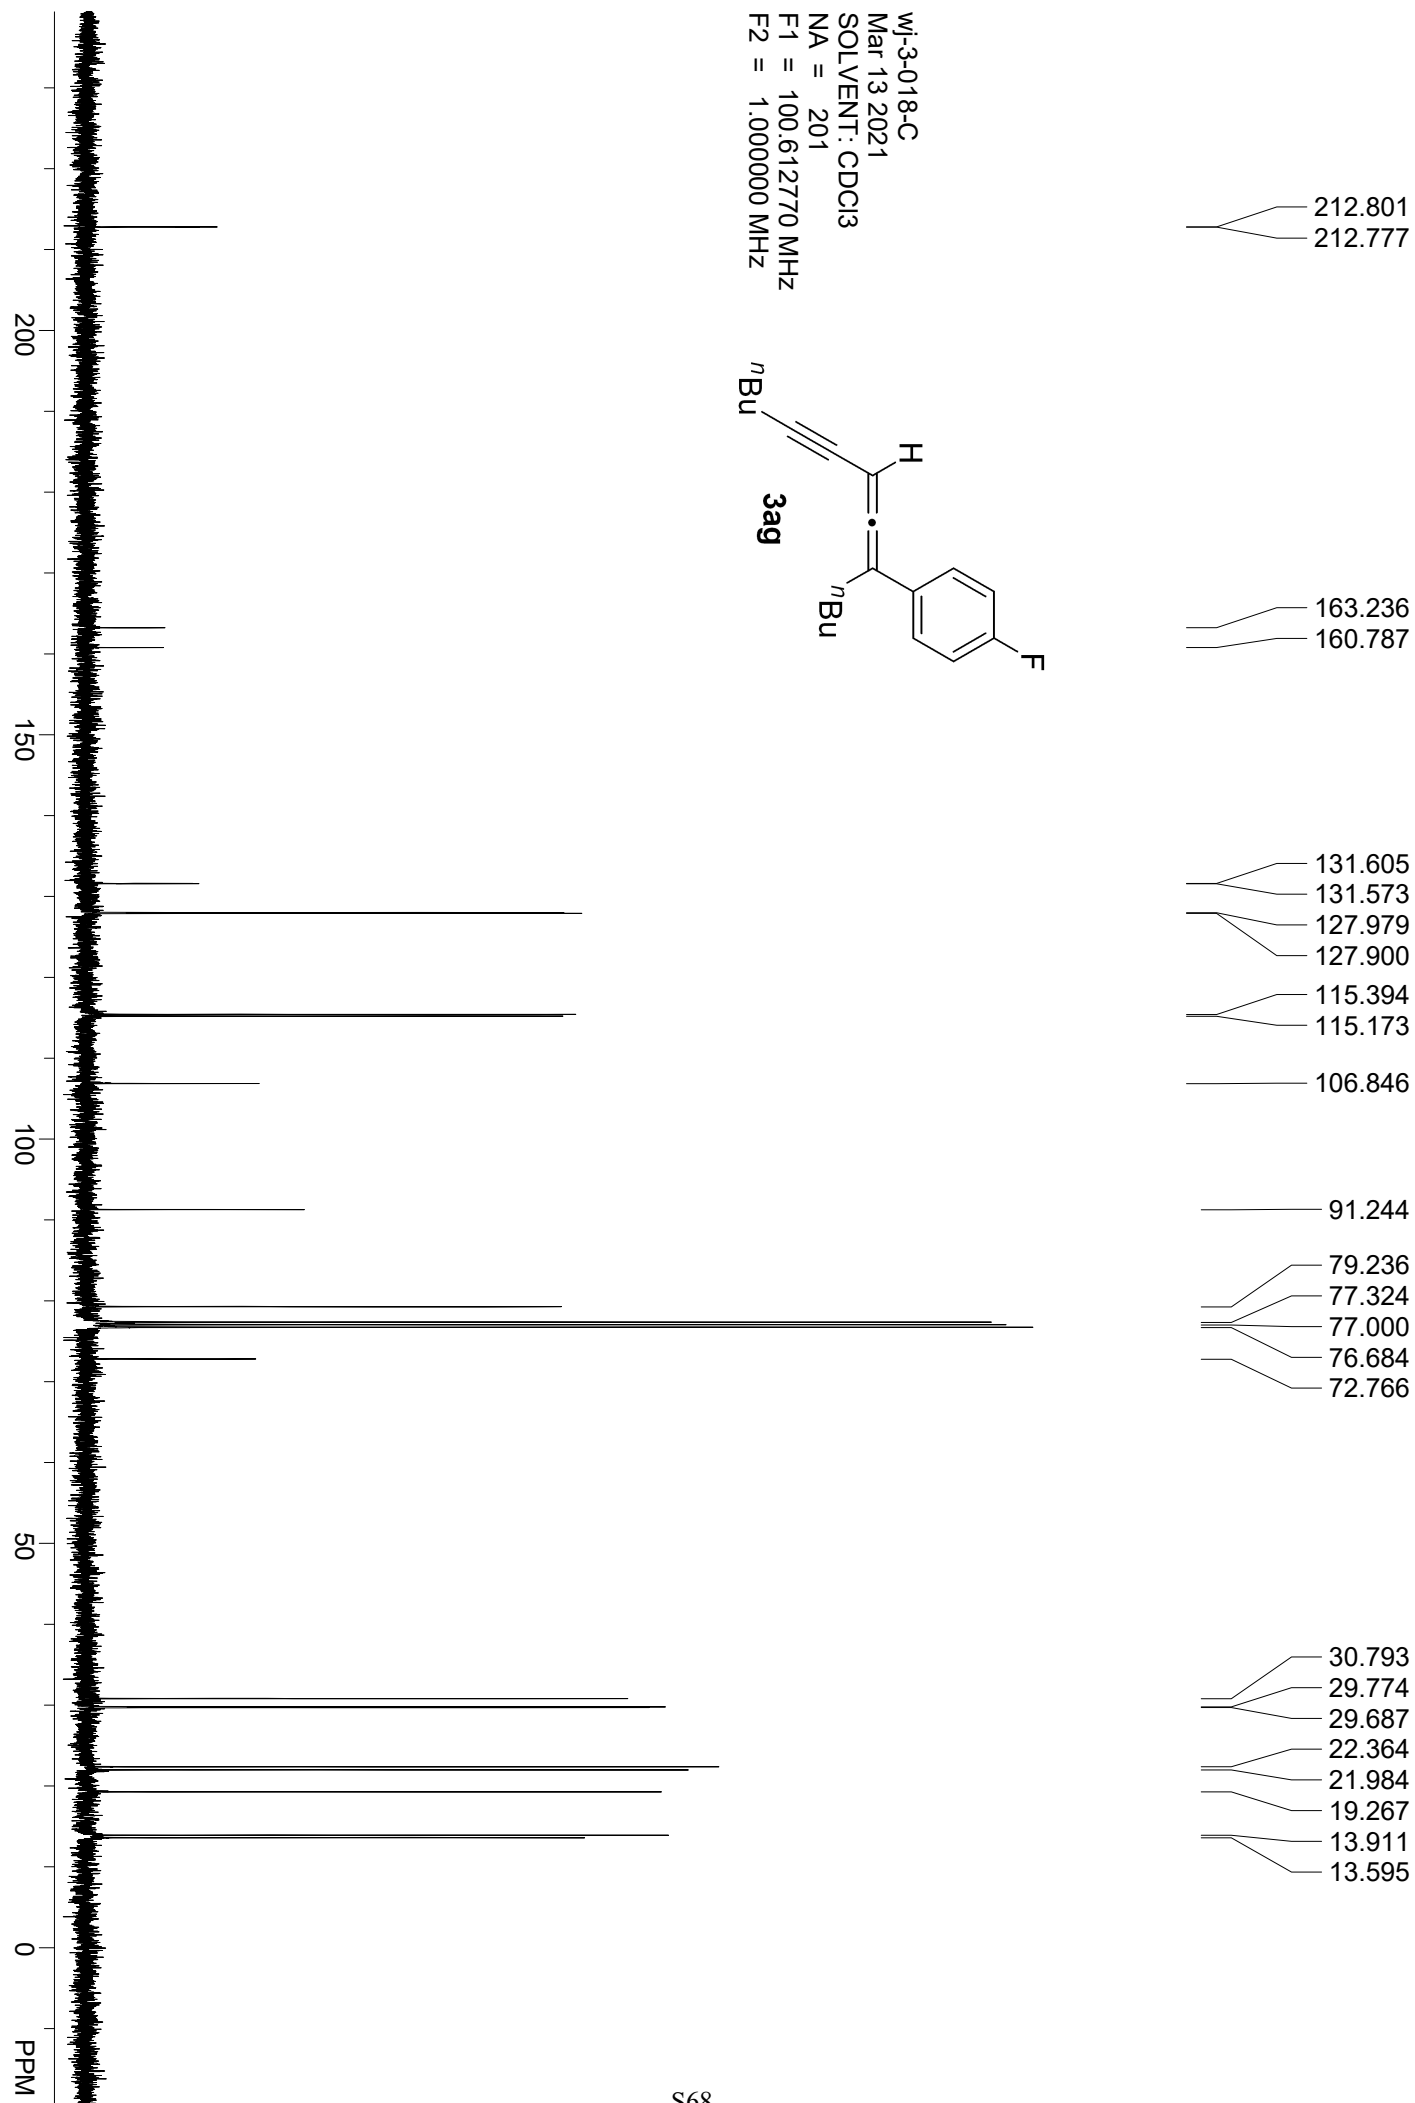



0.000

-115.941

WJ-3-018-F  
Mar 13 2021  
SOLVENT: CDCl3  
NA = 16  
F1 = 376.460724 MHz  
F2 = 1.000000 MHz

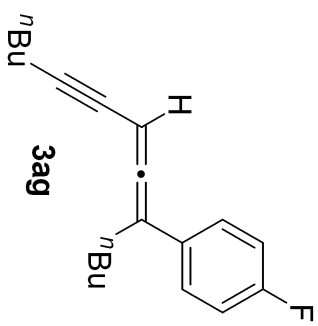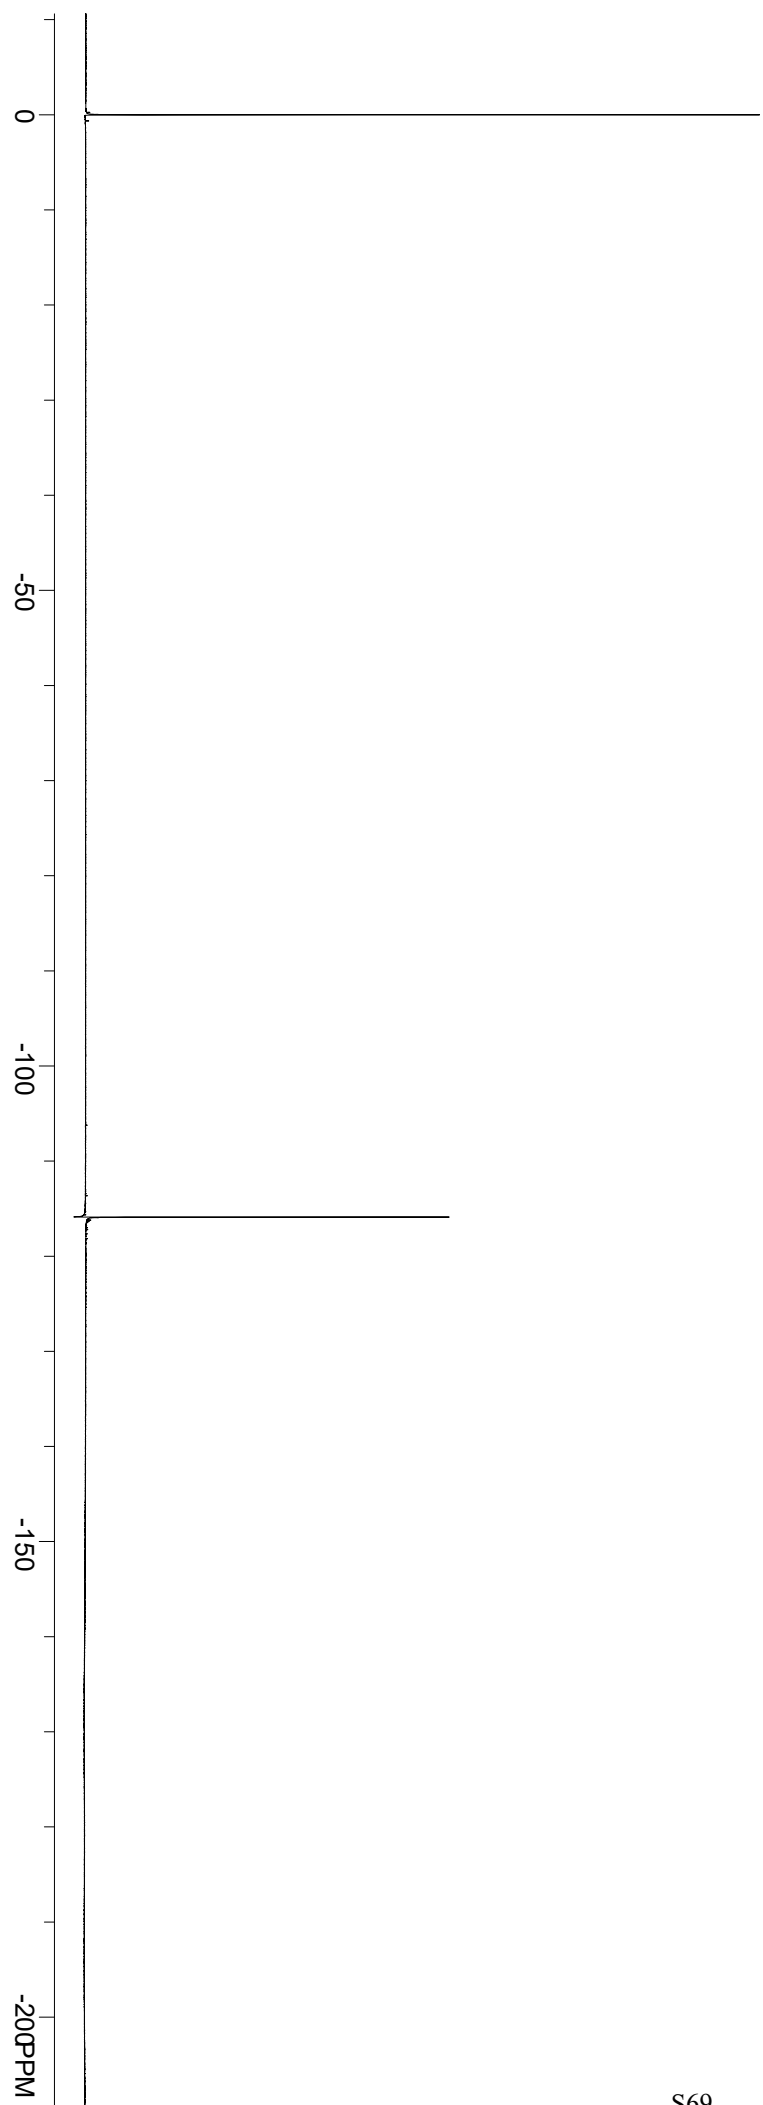

wj-3-019-H  
Mar 13 2021  
SOLVENT: CDCl3  
NA = 4  
F1 = 400.130005 MHz  
F2 = 1.000000 MHz

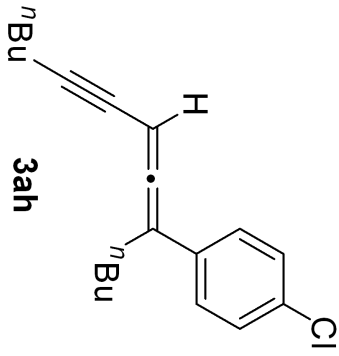

7.322  
7.300  
7.291  
7.269  
7.257

5.736  
5.731

2.451  
2.442  
2.433  
2.424  
2.415  
2.405  
2.397  
2.329  
2.324  
2.312  
2.307  
2.295  
2.289

1.543  
1.521  
1.506  
1.501  
1.484  
1.457  
1.440  
1.421  
1.403  
1.385  
1.367  
0.952  
0.933  
0.913  
0.894  
0.000

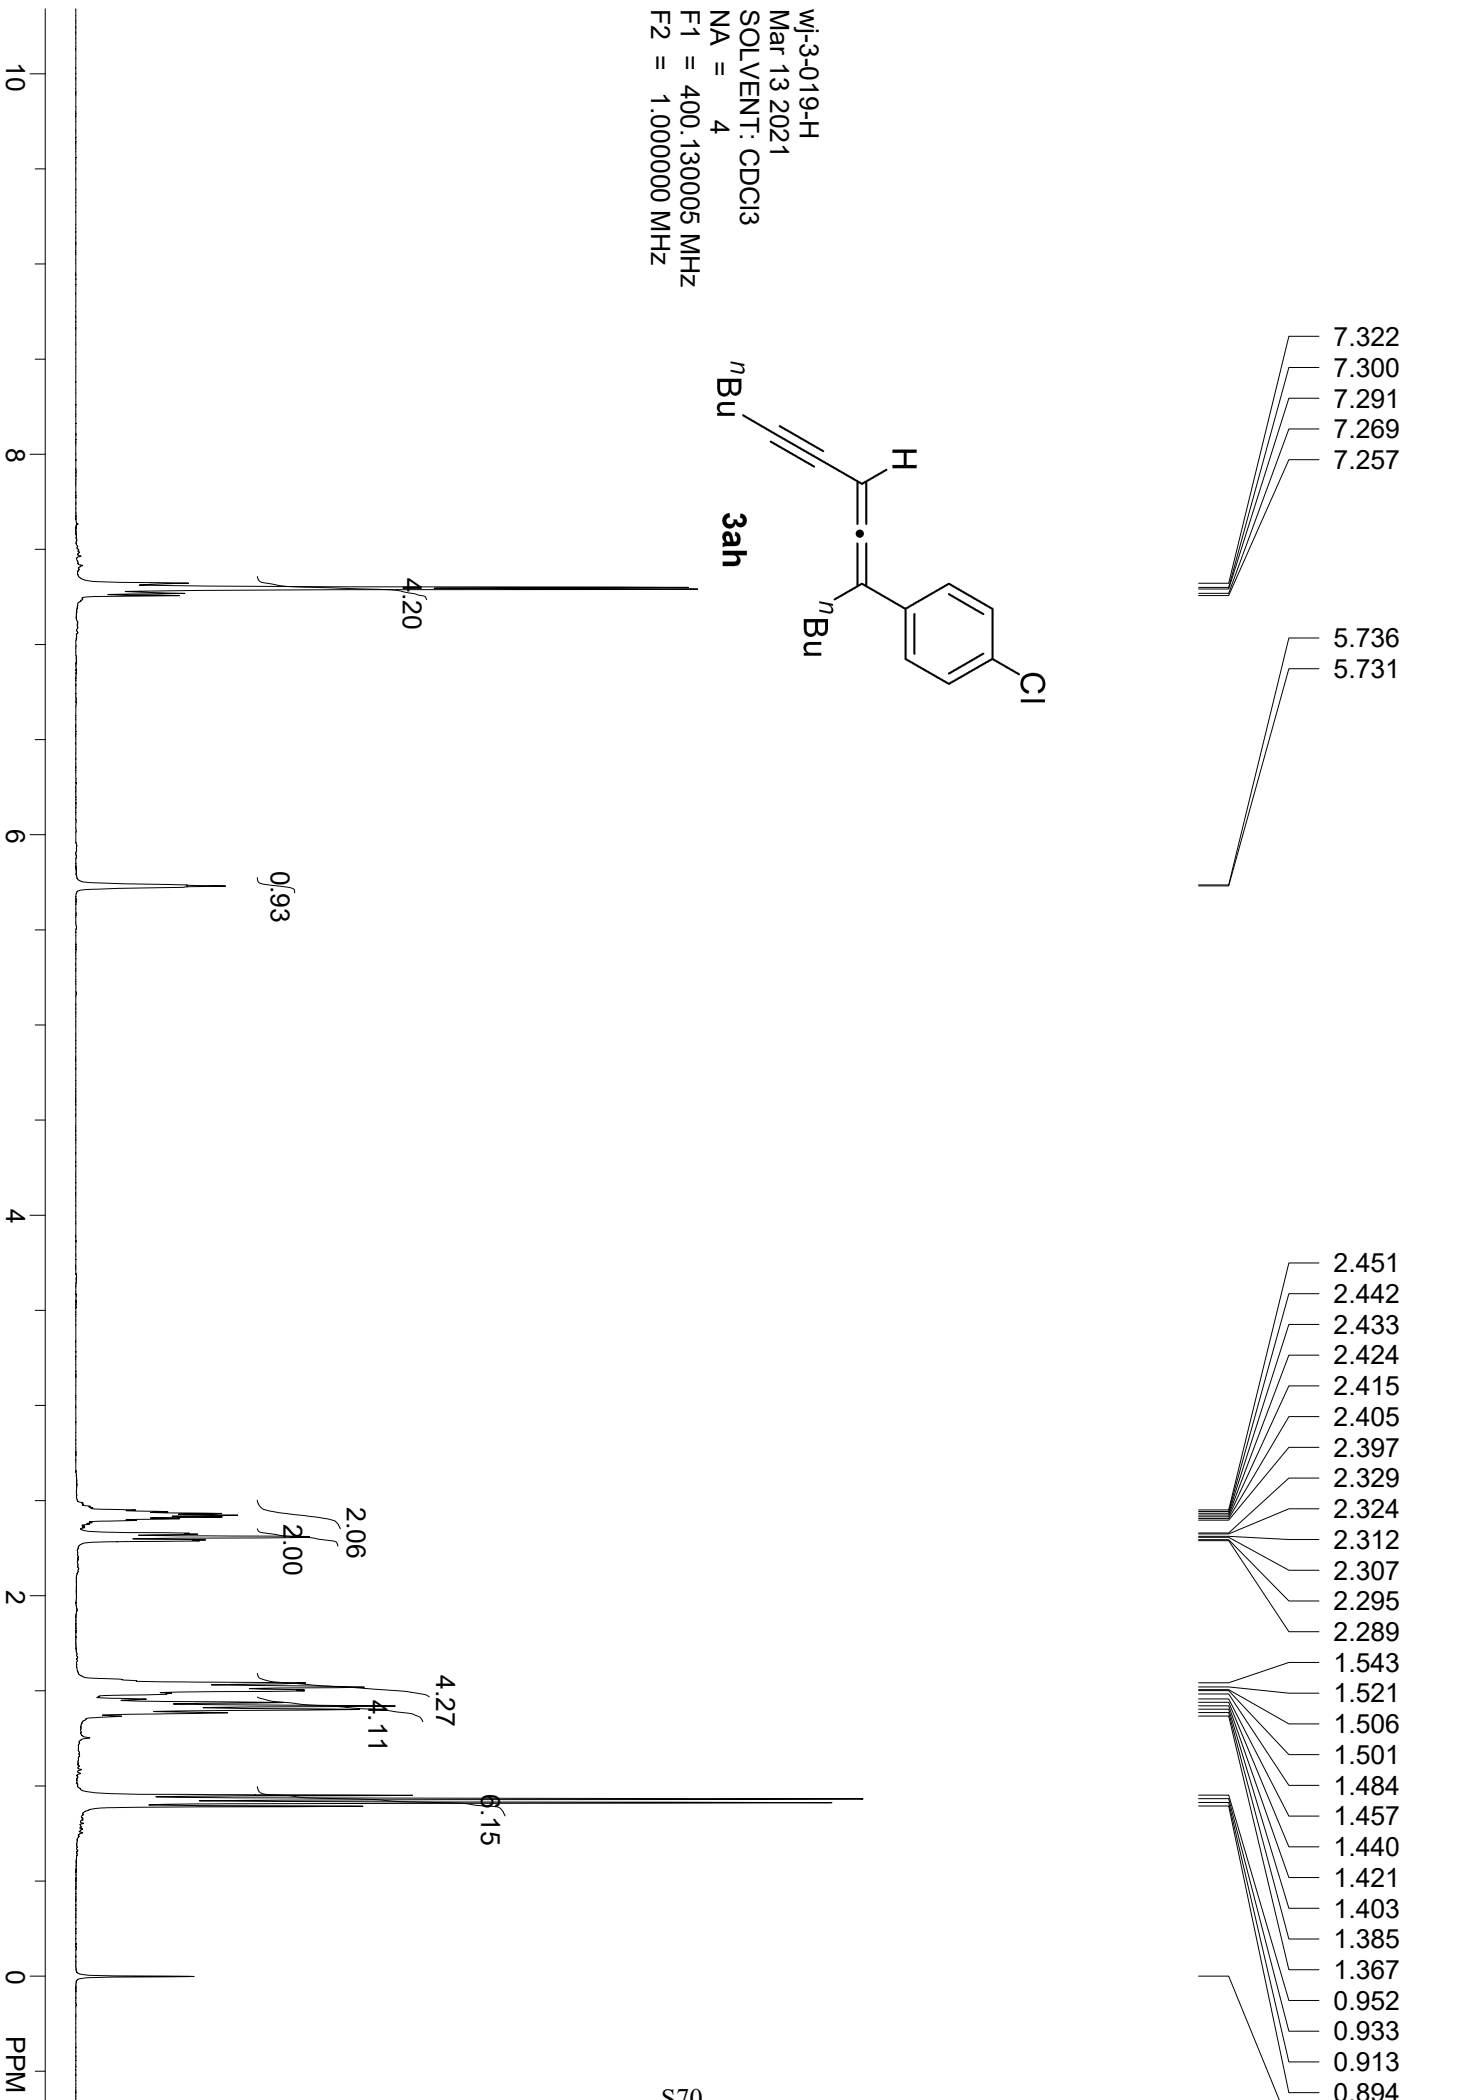

212.990

134.180  
132.813  
128.524  
127.647

106.870

91.512

79.465  
77.316  
77.000  
76.676  
72.536

30.761  
29.655  
29.545  
22.340  
21.977  
19.267  
13.903  
13.595

wj-3-019-C  
Mar 13 2021  
SOLVENT: CDCl3  
NA = 250  
F1 = 100.612770 MHz  
F2 = 1.000000 MHz

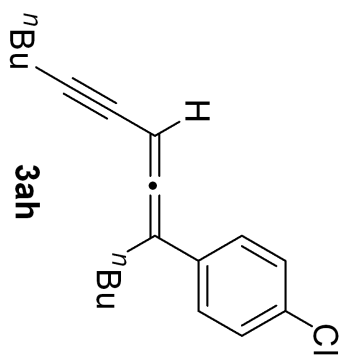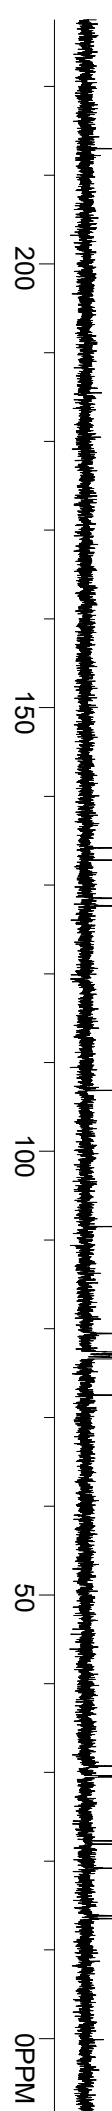

wj-3-028-H  
Mar 21 2021  
SOLVENT: CDCl3  
NA = 4  
F1 = 400.130005 MHz  
F2 = 1.000000 MHz

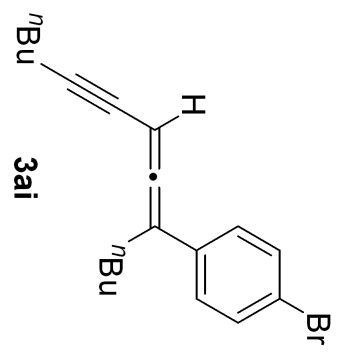

7.441  
7.420  
7.252  
7.231

5.720

2.444  
2.434  
2.425  
2.416  
2.407  
2.398  
2.389  
2.327  
2.322  
2.309  
2.304  
2.291  
2.287  
1.551  
1.535  
1.517  
1.498  
1.481  
1.454  
1.436  
1.418  
1.400  
1.382  
1.364  
0.949  
0.930  
0.911  
0.892  
0.000

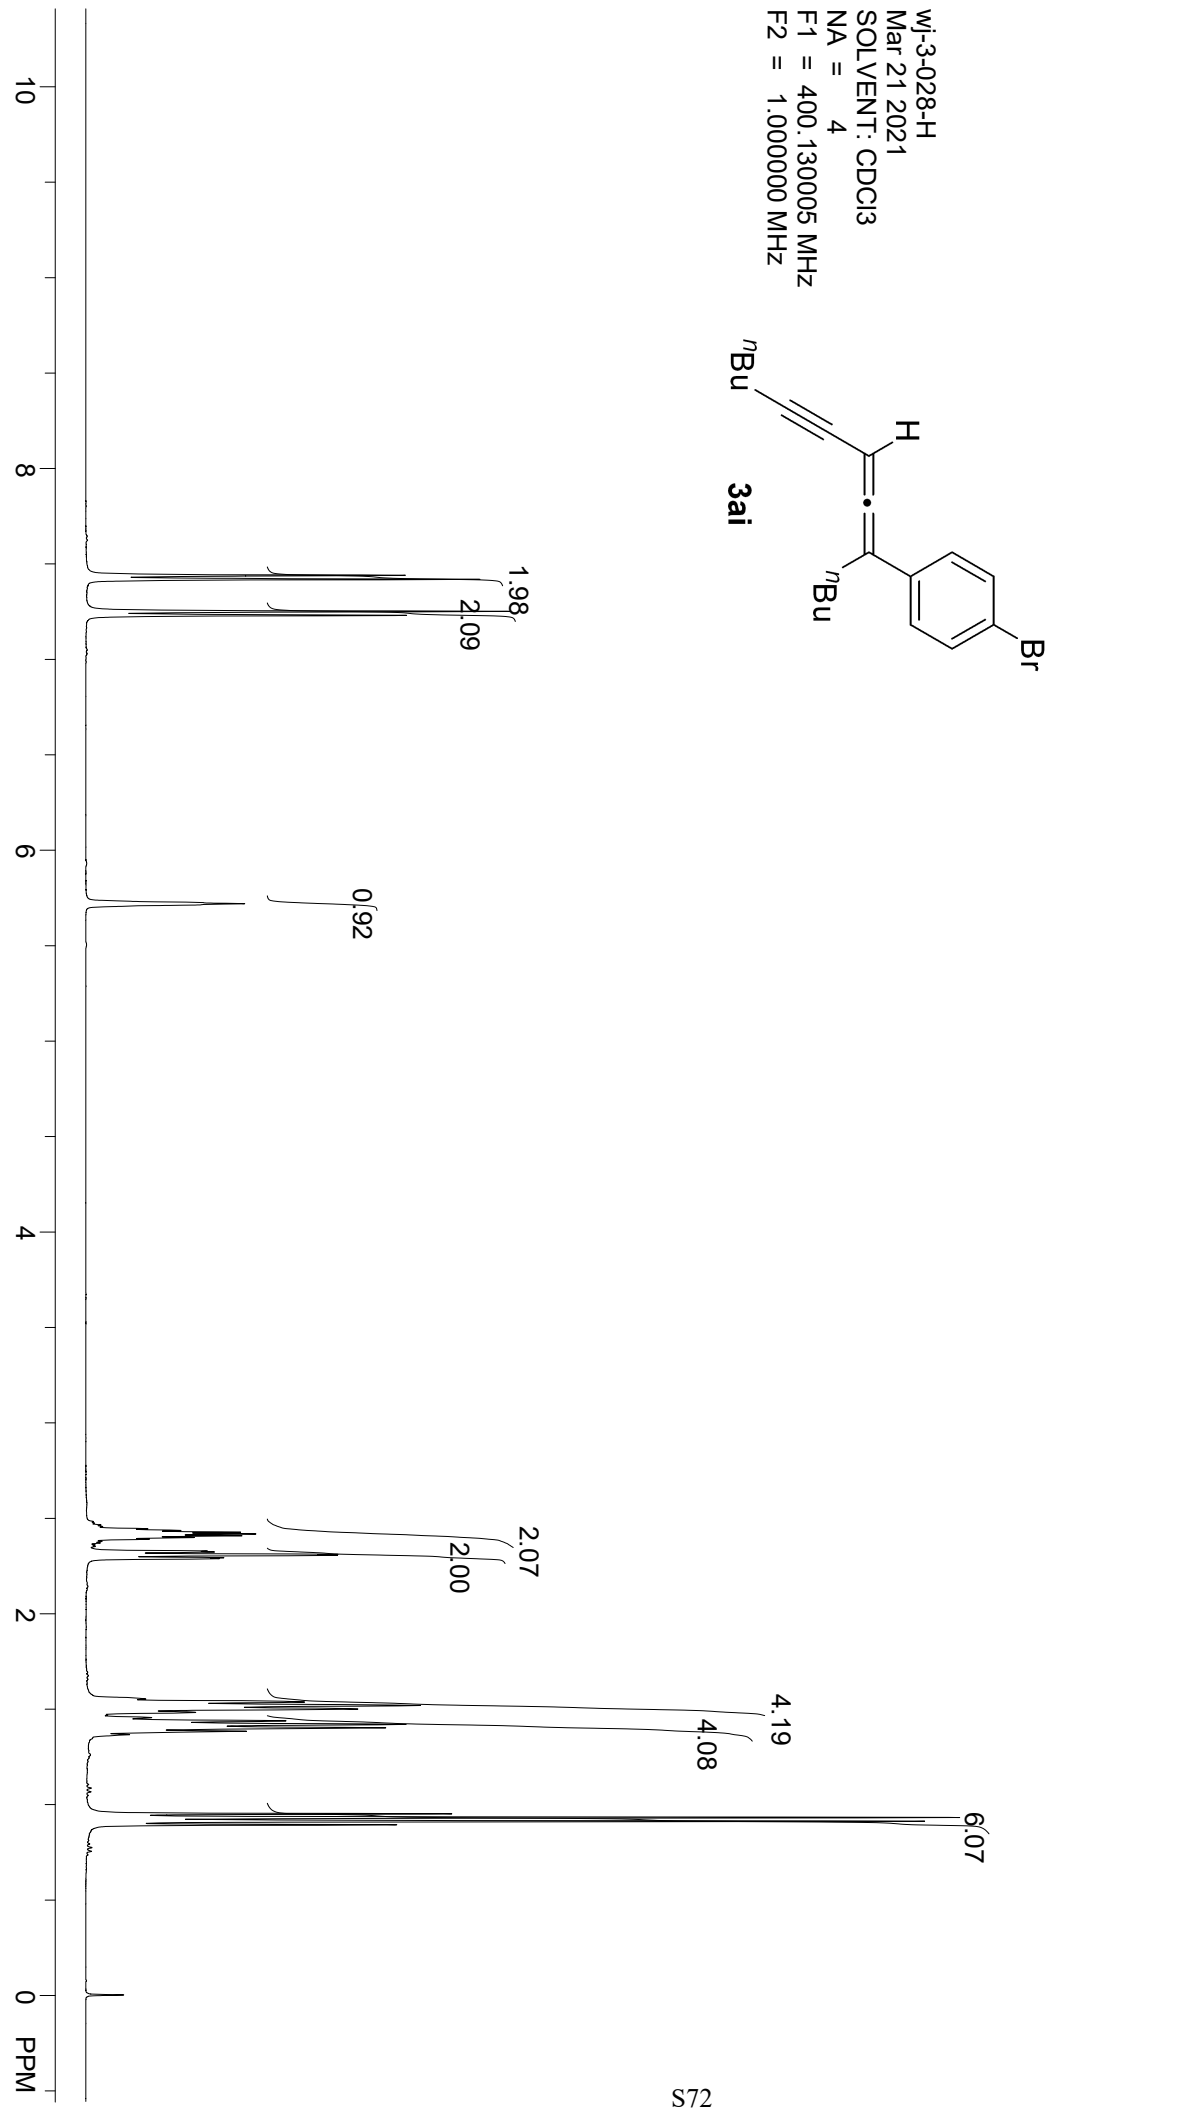

212.967

134.670

131.463

127.979

120.956

106.917

91.552

79.528

77.316

77.000

76.676

72.457

30.753

29.640

29.474

22.332

21.969

19.259

13.887

13.587

wf-3-028-C  
Mar 21 2021  
SOLVENT: CDCl3  
NA = 300  
F1 = 100.612770 MHz  
F2 = 1.000000 MHz

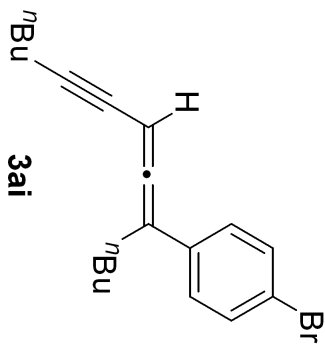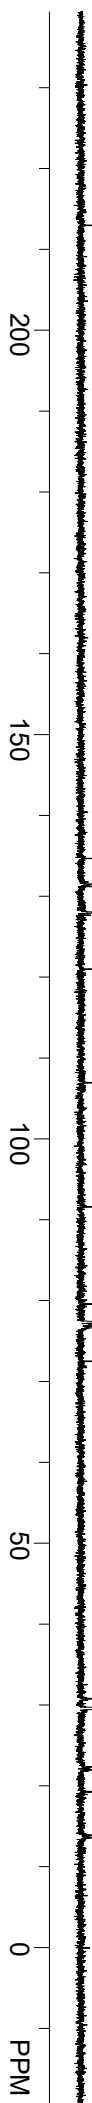

wj-3-031-H  
Mar 21 2021  
SOLVENT: CDCl3  
NA = 4  
F1 = 400.130005 MHz  
F2 = 1.000000 MHz

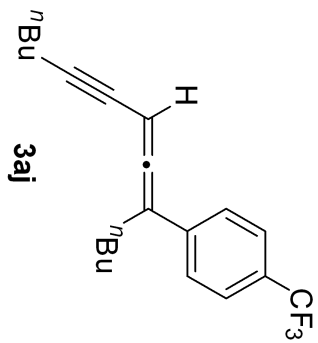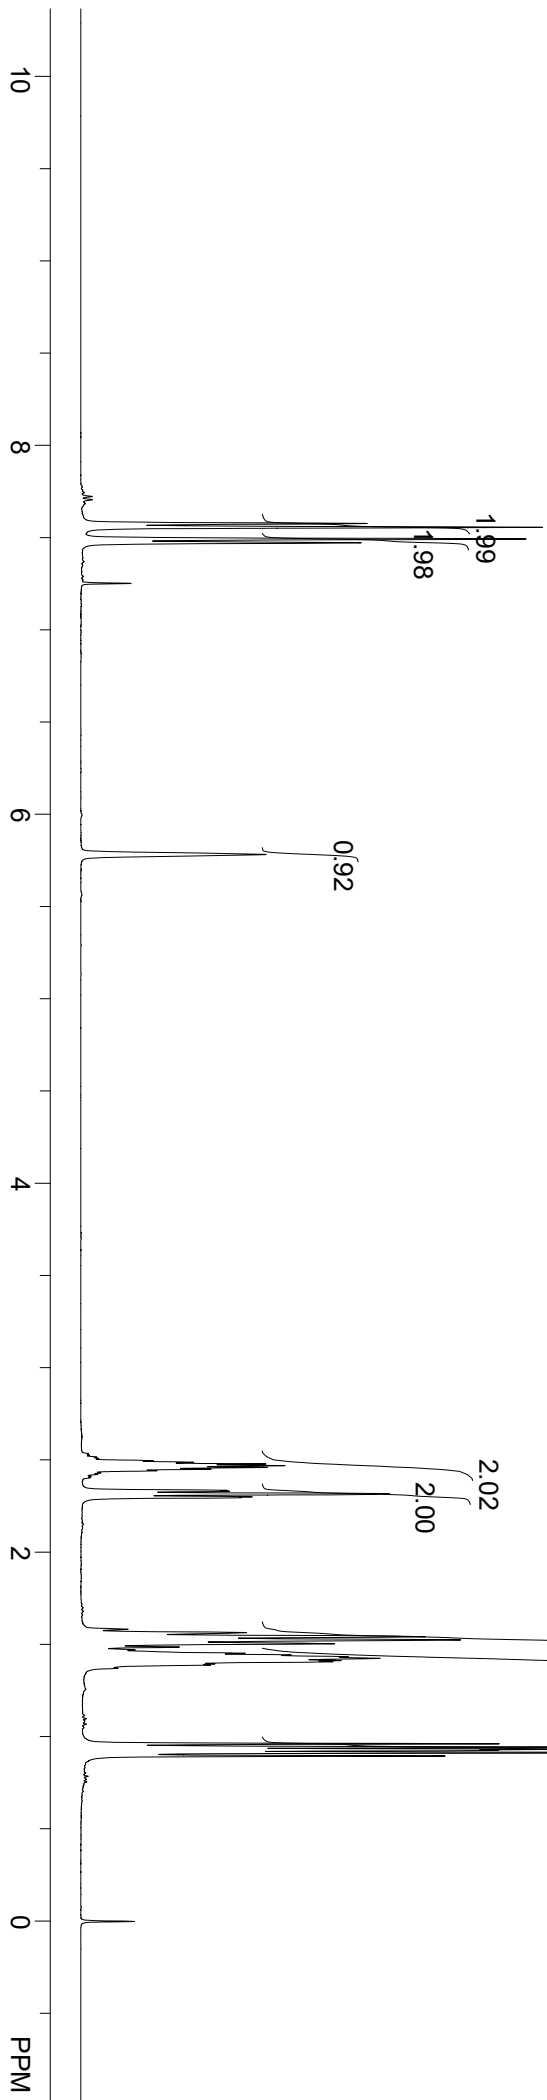

7.576  
7.556  
7.493  
7.472  
7.252

5.782

2.496  
2.487  
2.478  
2.469  
2.459  
2.450  
2.441  
2.335  
2.330  
2.317  
2.313  
2.300  
2.296  
1.583  
1.565  
1.542  
1.525  
1.504  
1.486  
1.471  
1.452  
1.443  
1.433  
1.425  
1.413  
1.407  
1.395  
1.389  
1.371  
0.962  
0.944  
0.932  
0.926  
0.914  
0.896  
0.000

213.630

139.600  
129.495  
129.172  
128.848  
128.532  
128.263  
126.596  
125.561  
125.372  
125.332  
125.293  
125.253  
122.859  
120.158  
106.941  
92.034  
79.812  
77.324  
77.000  
76.684  
72.181

30.746  
29.655  
29.482  
22.340  
21.984  
19.275  
13.879  
13.579

WJ-3-031-C  
Mar 21 2021  
SOLVENT: CDCl3  
NA = 300  
F1 = 100.612770 MHz  
F2 = 1.000000 MHz

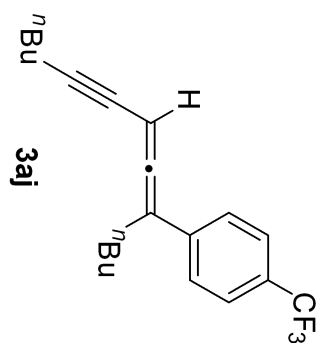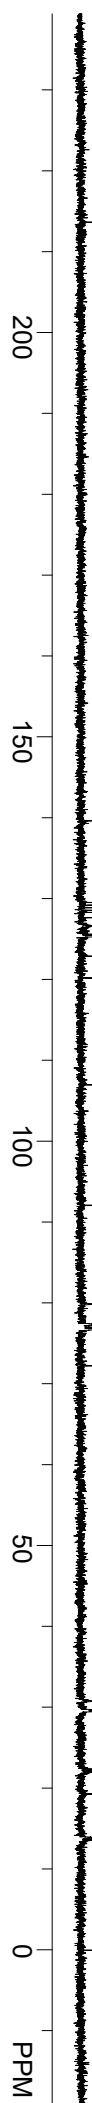

WJ-3-031-F  
Mar 22 2021  
SOLVENT: CDCl3  
NA = 16  
F1 = 376.498352 MHz  
F2 = 1.000000 MHz

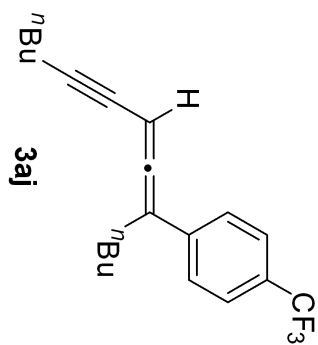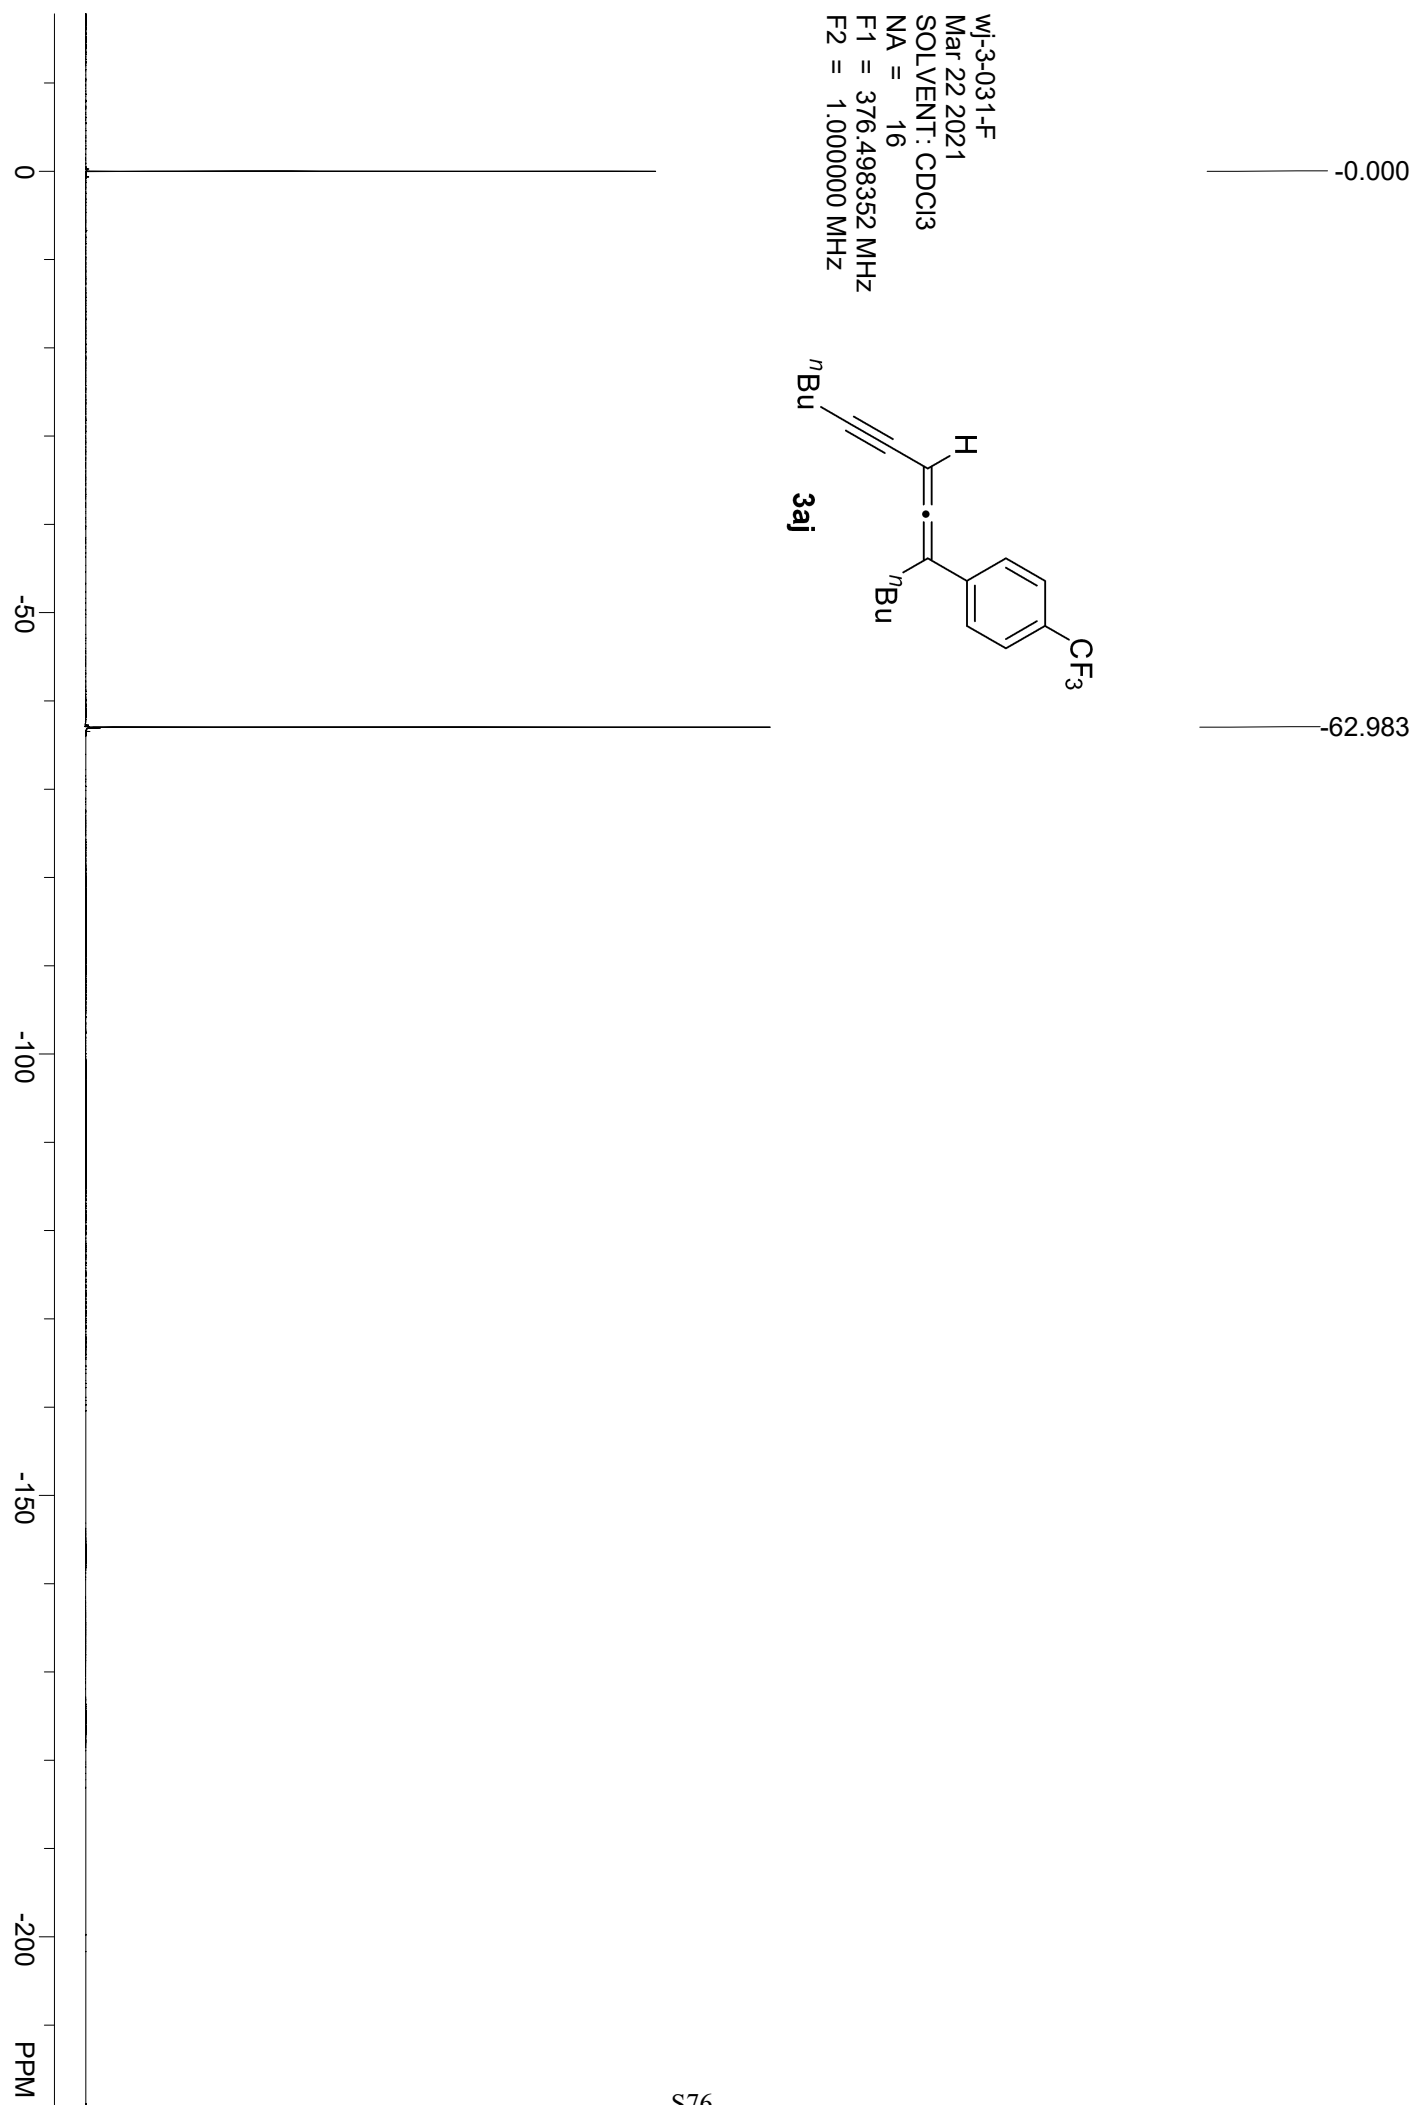



wf-3-032-H  
Mar 22 2021  
SOLVENT: CDCl3  
NA = 4  
F1 = 400.130005 MHz  
F2 = 1.000000 MHz

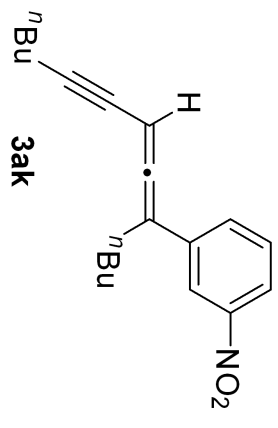

- 8.201
- 8.086
- 8.066
- 7.727
- 7.708
- 7.509
- 7.490
- 7.469
- 7.267

5.840

- 2.525
- 2.516
- 2.506
- 2.499
- 2.493
- 2.486
- 2.467
- 2.343
- 2.339
- 2.326
- 2.321
- 2.308
- 2.304
- 1.581
- 1.563
- 1.545
- 1.528
- 1.511
- 1.492
- 1.470
- 1.451
- 1.431
- 1.412
- 1.394
- 1.377
- 0.976
- 0.957
- 0.937
- 0.918
- 0.900
- 0.000

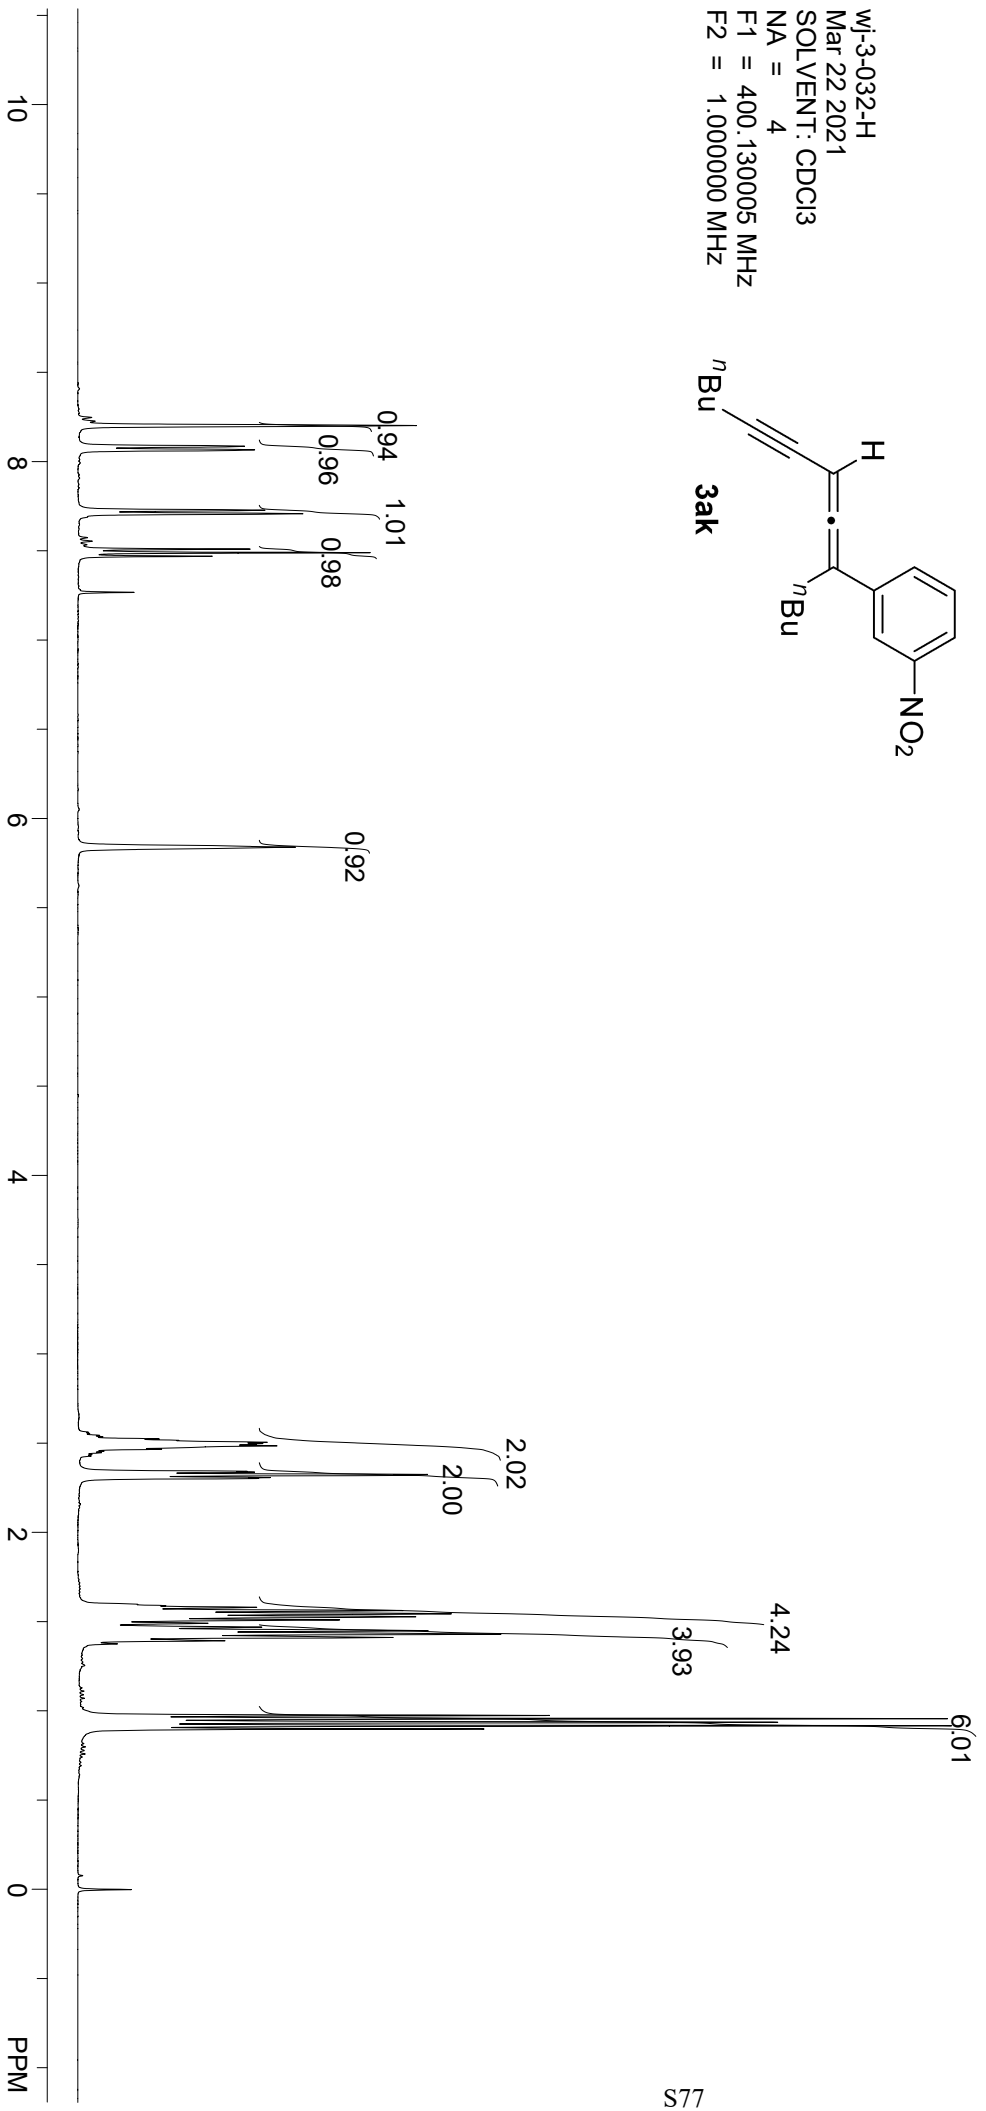

wj-3-032-C  
Mar 22 2021  
SOLVENT: CDCl3  
NA = 170  
F1 = 100.612770 MHz  
F2 = 1.000000 MHz

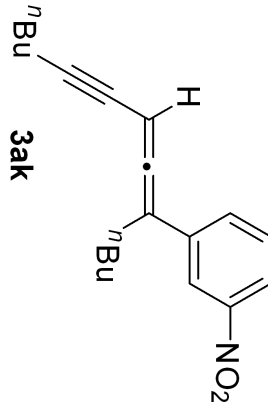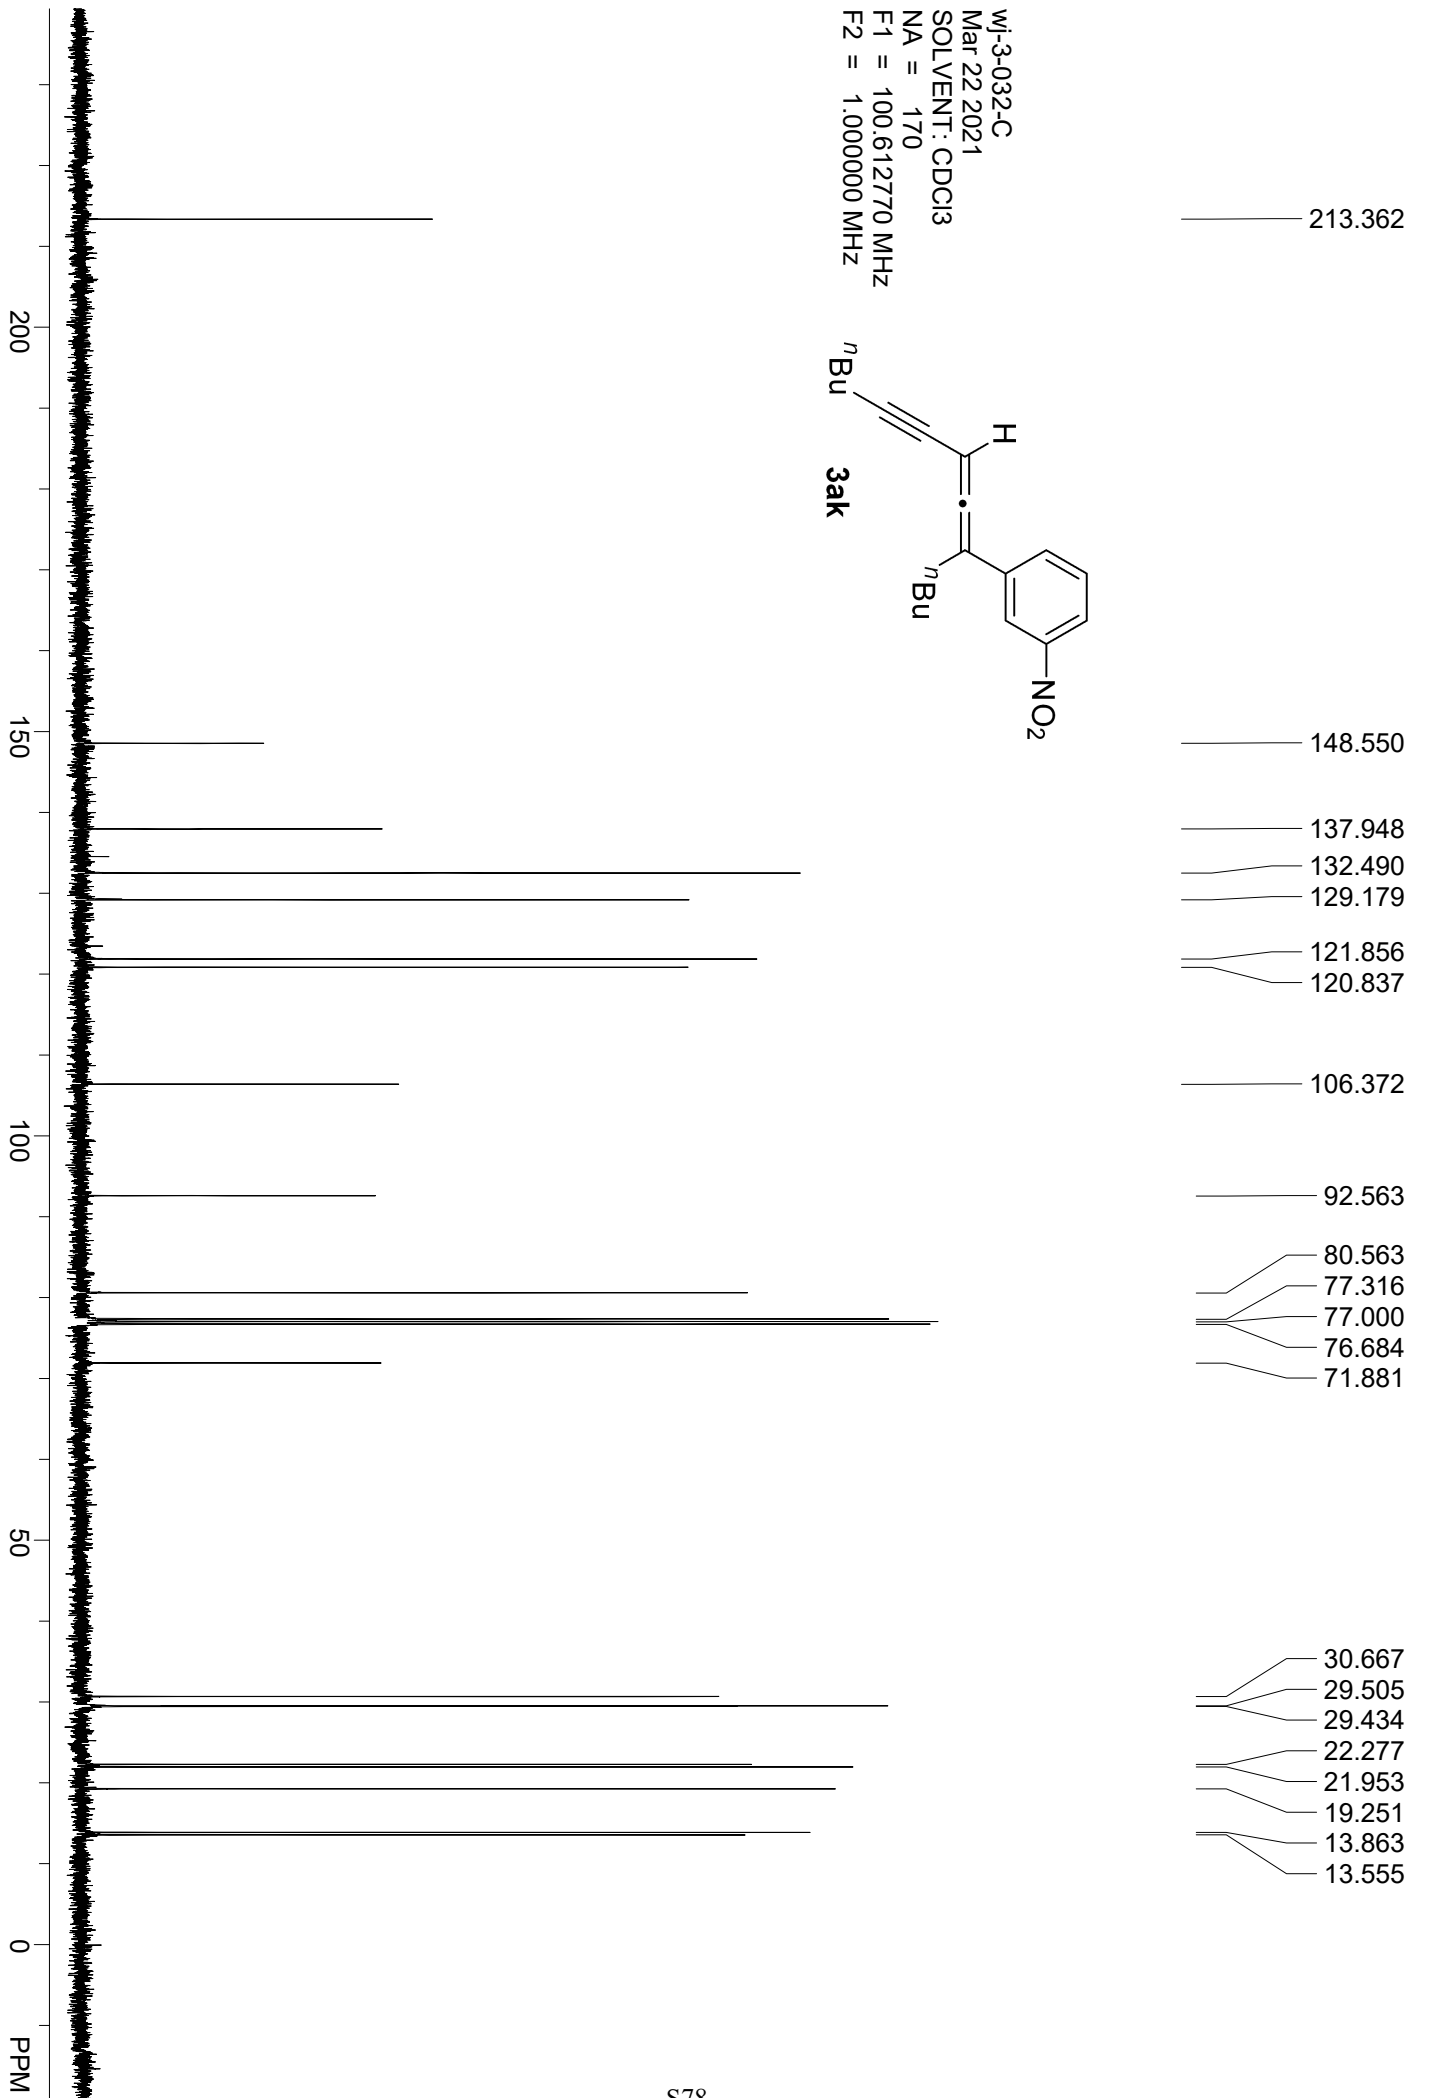

wf-3-110-H  
May 18 2021  
SOLVENT: CDCl3  
NA = 4  
F1 = 400.130035 MHz  
F2 = 1.000000 MHz

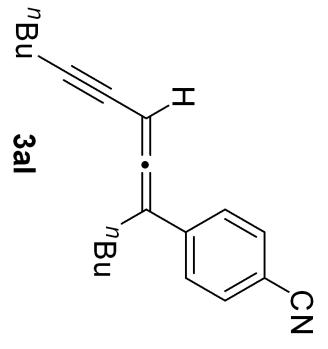

- 7.612
- 7.592
- 7.483
- 7.463
- 7.263

5.811

- 2.476
- 2.469
- 2.459
- 2.451
- 2.442
- 2.432
- 2.425
- 2.334
- 2.332
- 2.317
- 2.300
- 1.575
- 1.558
- 1.540
- 1.522
- 1.504
- 1.487
- 1.443
- 1.425
- 1.410
- 1.390
- 0.962
- 0.944
- 0.933
- 0.926
- 0.915
- 0.897
- 0.000

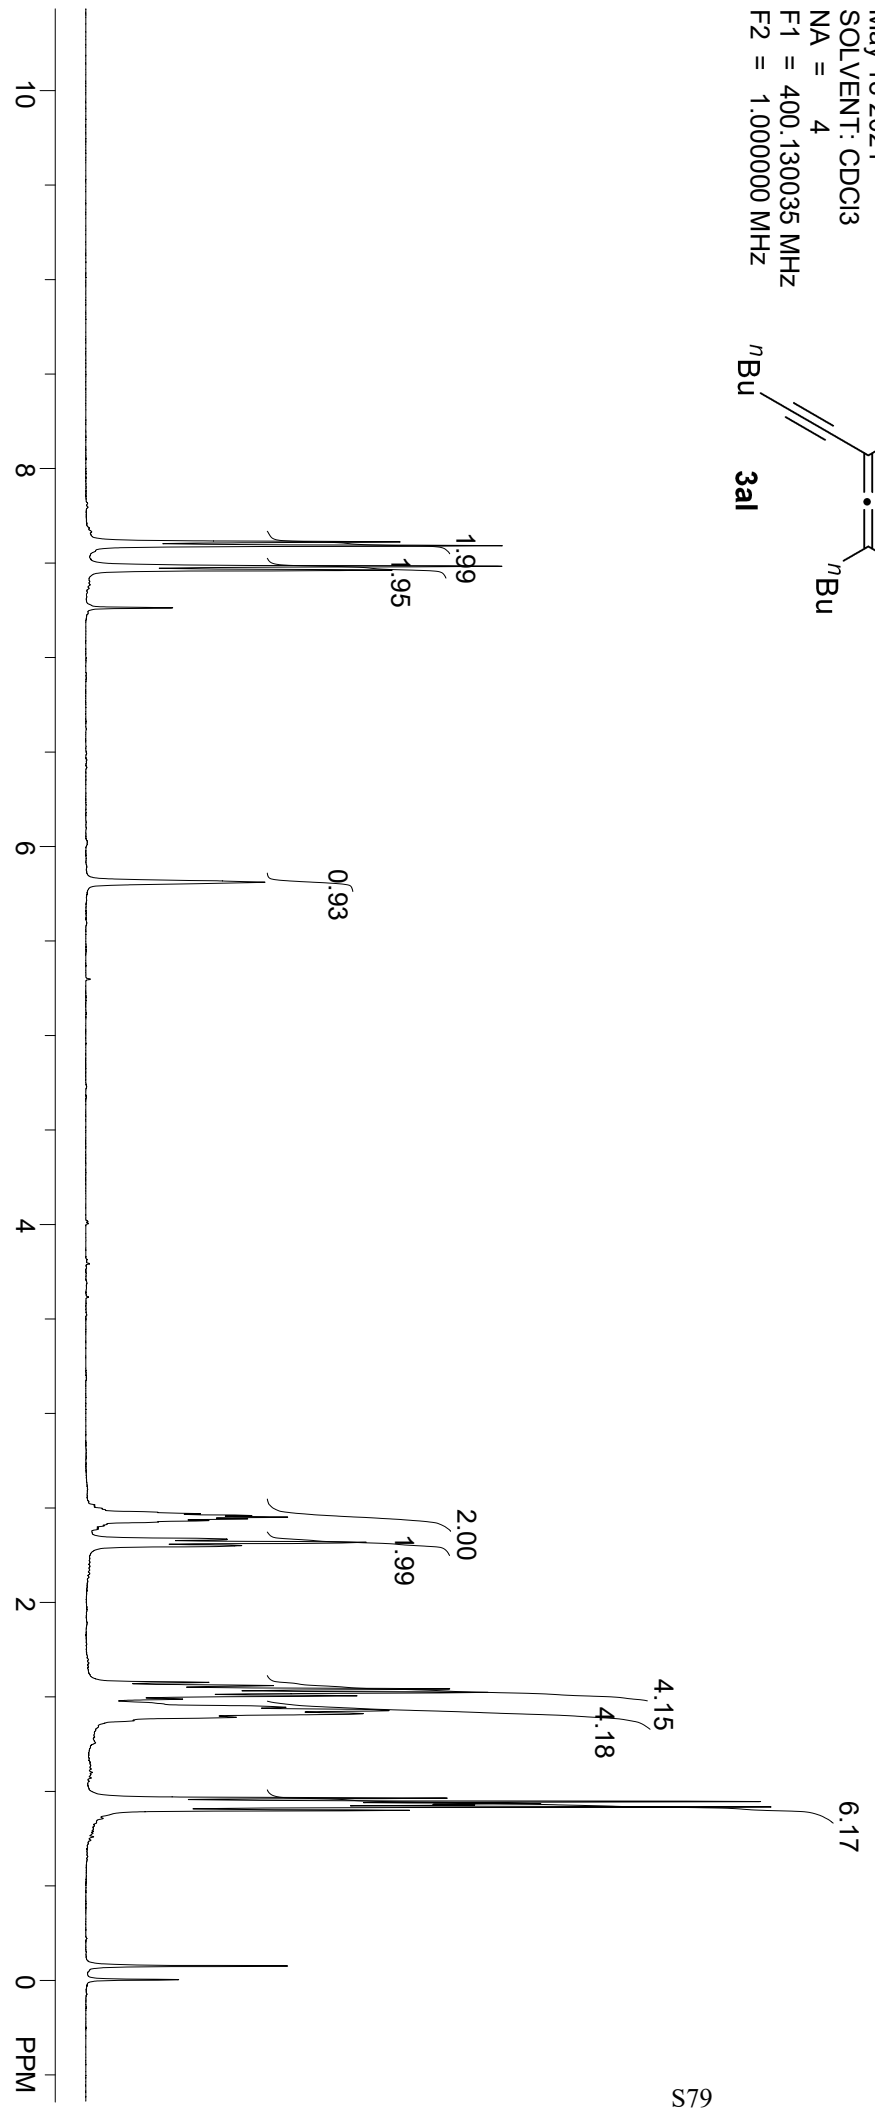

214.065

140.800

132.166

126.896

118.973

110.393

106.941

92.571

80.326

77.324

77.000

76.684

71.754

30.682

29.592

29.245

22.293

21.961

19.259

13.855

13.563

wj-3-110-C  
May 18 2021  
SOLVENT: CDCl3  
NA = 200  
F1 = 100.612770 MHz  
F2 = 1.000000 MHz

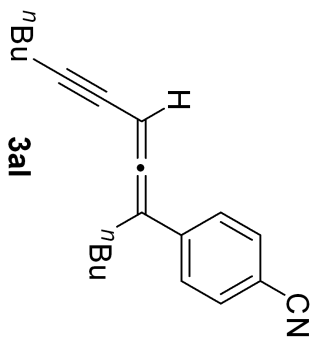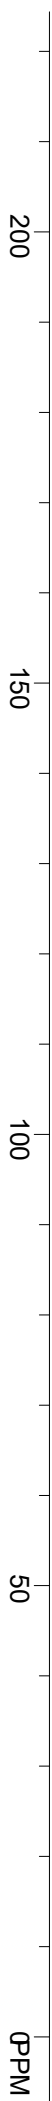

WJ-3-021-H  
 Mar 16 2021  
 SOLVENT: CDC13  
 NA = 4  
 F1 = 400.130005 MHz  
 F2 = 1.000000 MHz

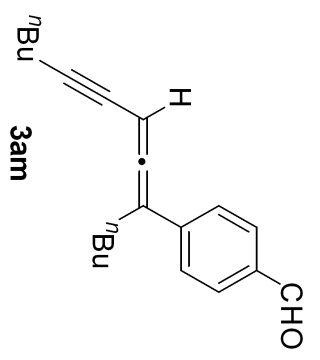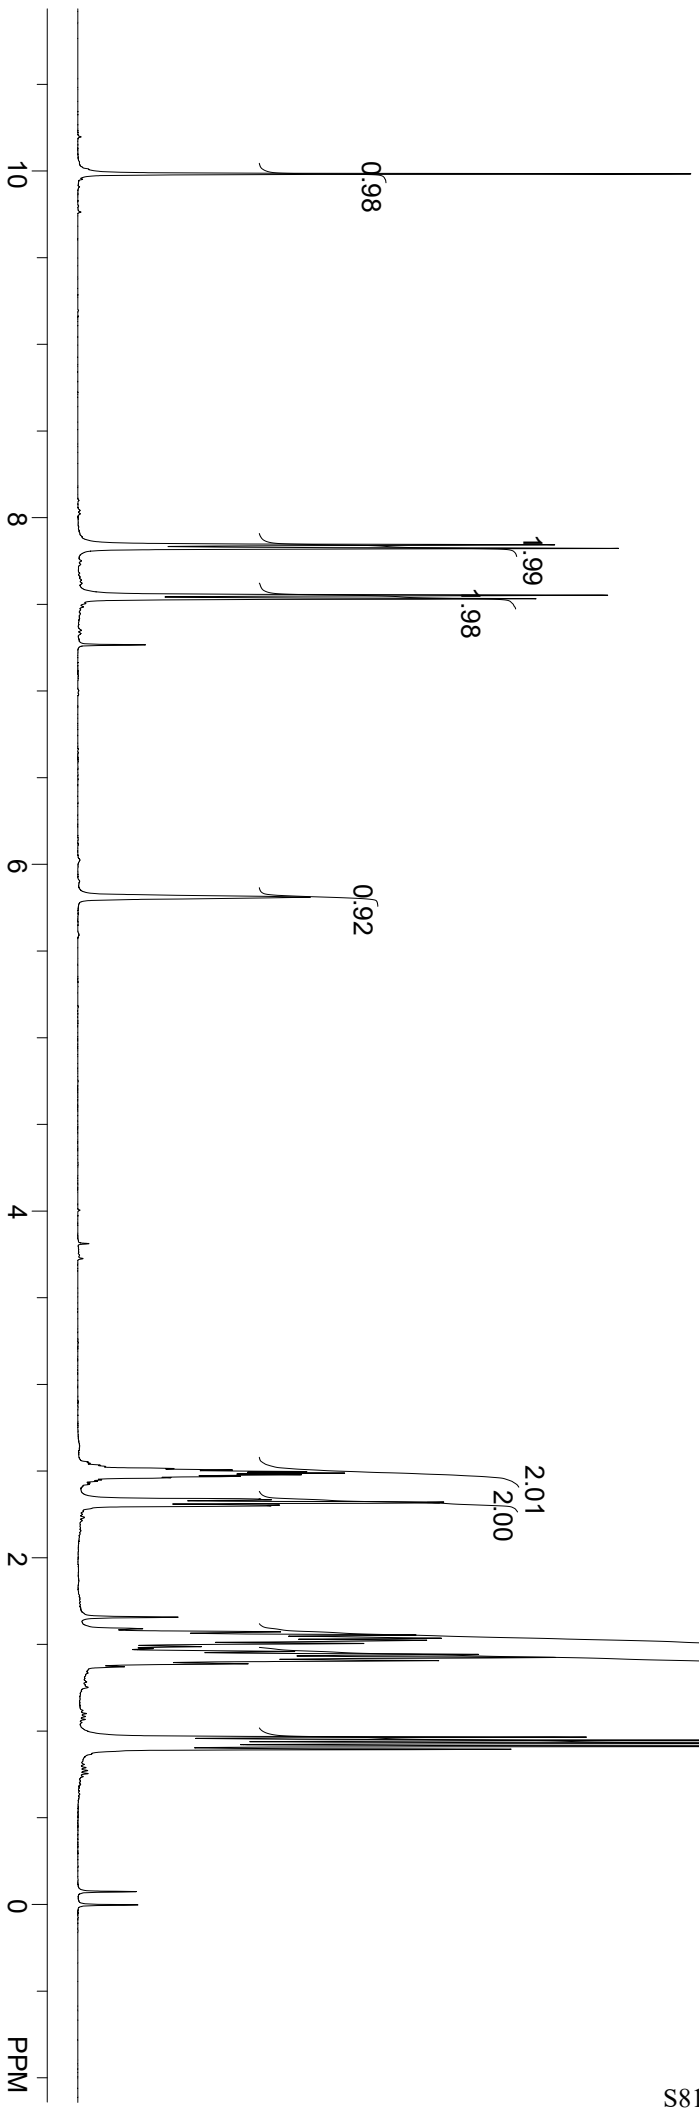

9.983

7.843  
 7.823  
 7.553  
 7.533  
 7.267

5.811

2.516  
 2.508  
 2.499  
 2.490  
 2.480  
 2.471  
 2.463  
 2.340  
 2.336  
 2.323  
 2.319  
 2.306  
 2.301  
 1.574  
 1.556  
 1.538  
 1.526  
 1.507  
 1.489  
 1.461  
 1.444  
 1.427  
 1.408  
 1.390  
 0.967  
 0.949  
 0.932  
 0.915  
 0.897  
 0.000

wf-3-021-C  
Mar 16 2021  
SOLVENT: CDCl3  
NA = 101  
F1 = 100.612770 MHz  
F2 = 1.000000 MHz

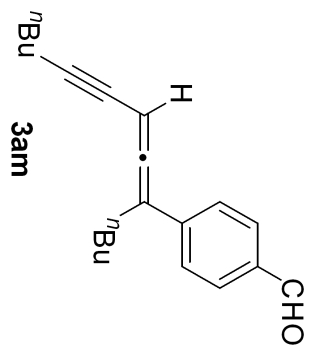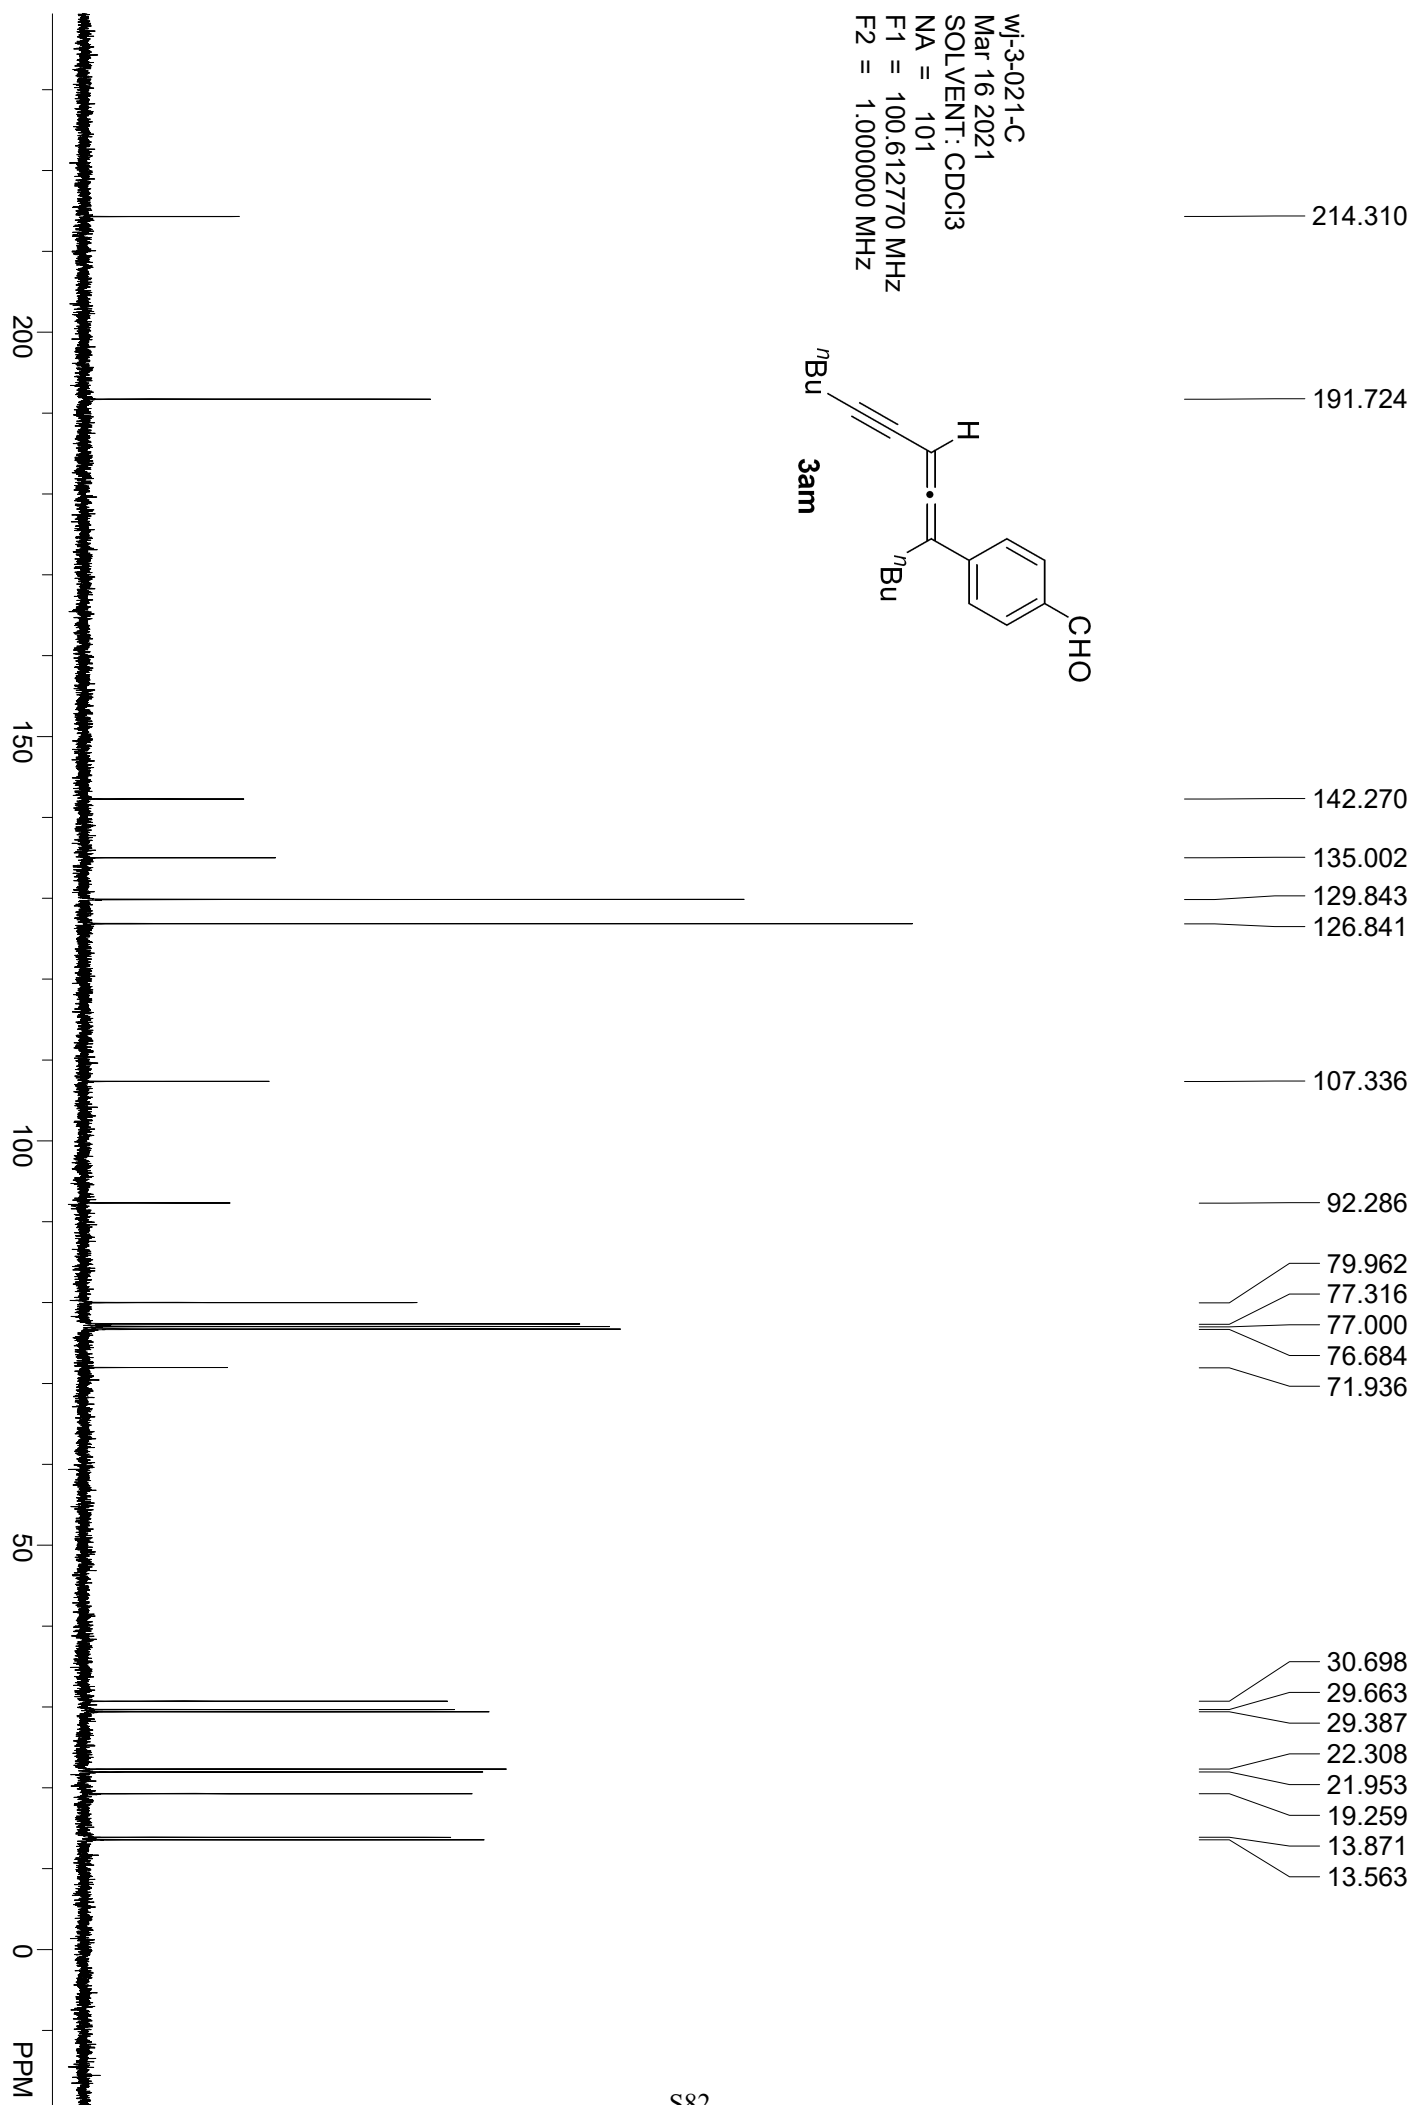

WJ-3-022-H  
 Mar 16 2021  
 SOLVENT: CDCl3  
 NA = 4  
 F1 = 400.130005 MHz  
 F2 = 1.000000 MHz

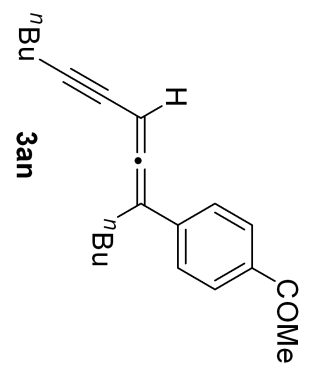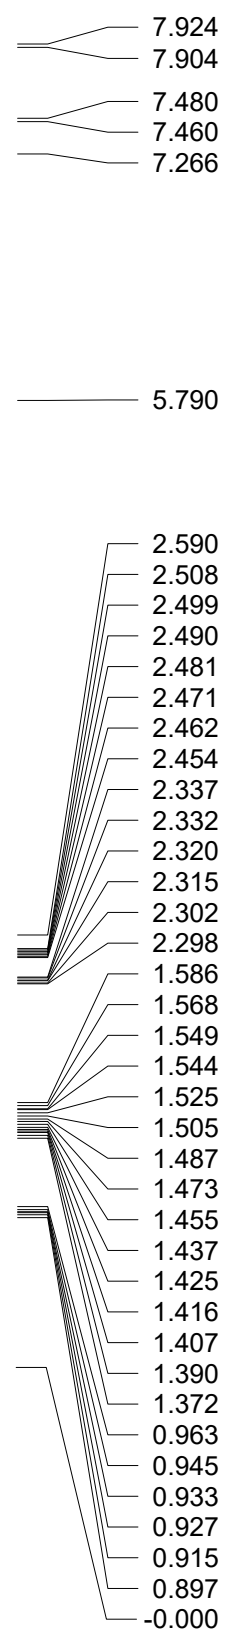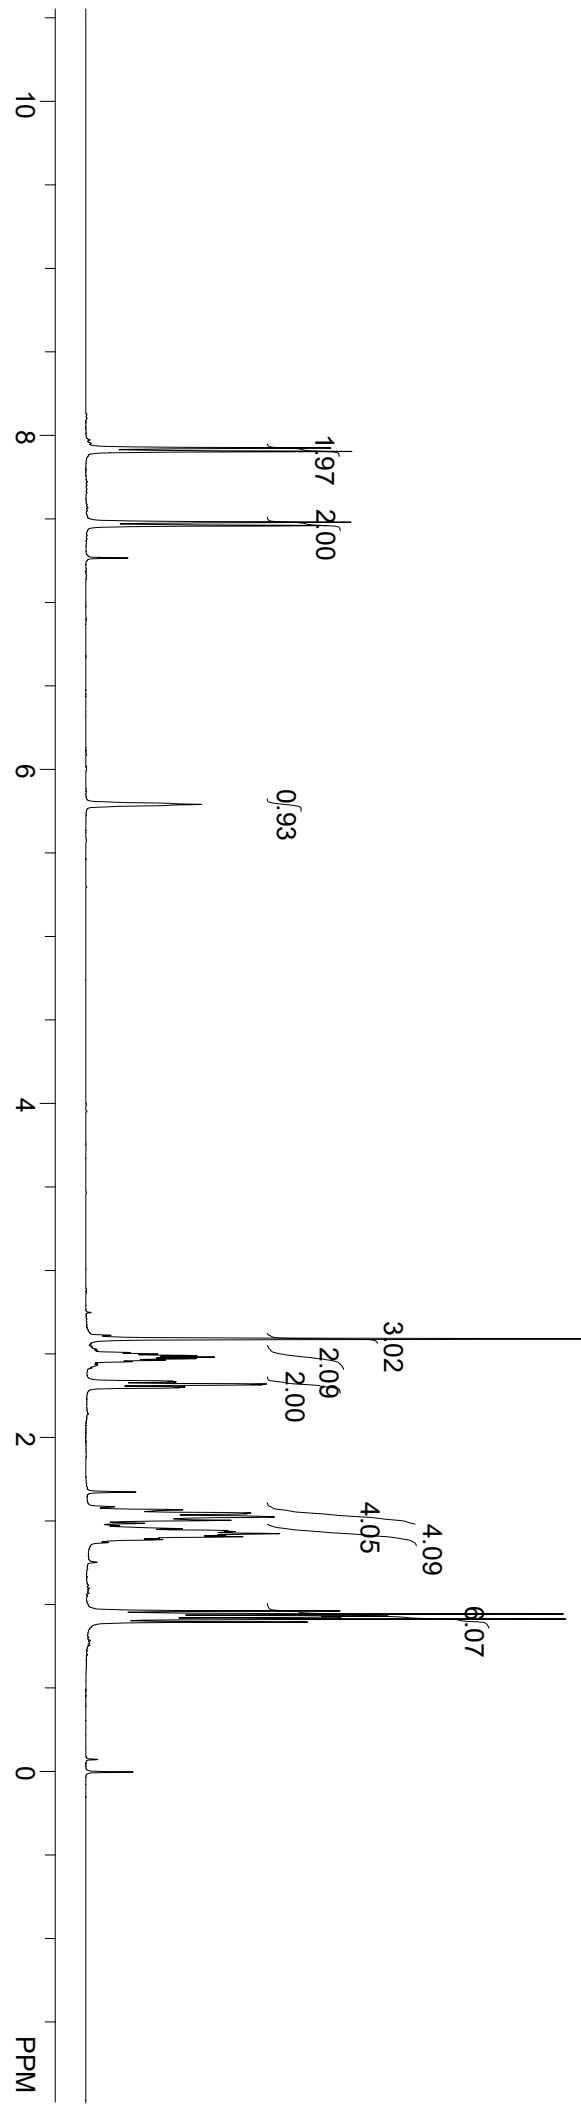

wj-3-022-C  
Mar 16 2021  
SOLVENT: CDCl3  
NA = 130  
F1 = 100.612770 MHz  
F2 = 1.000000 MHz

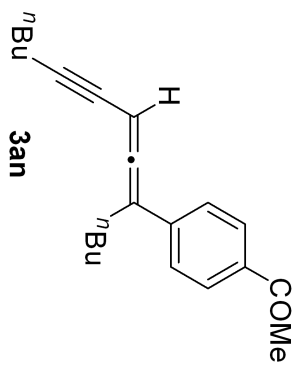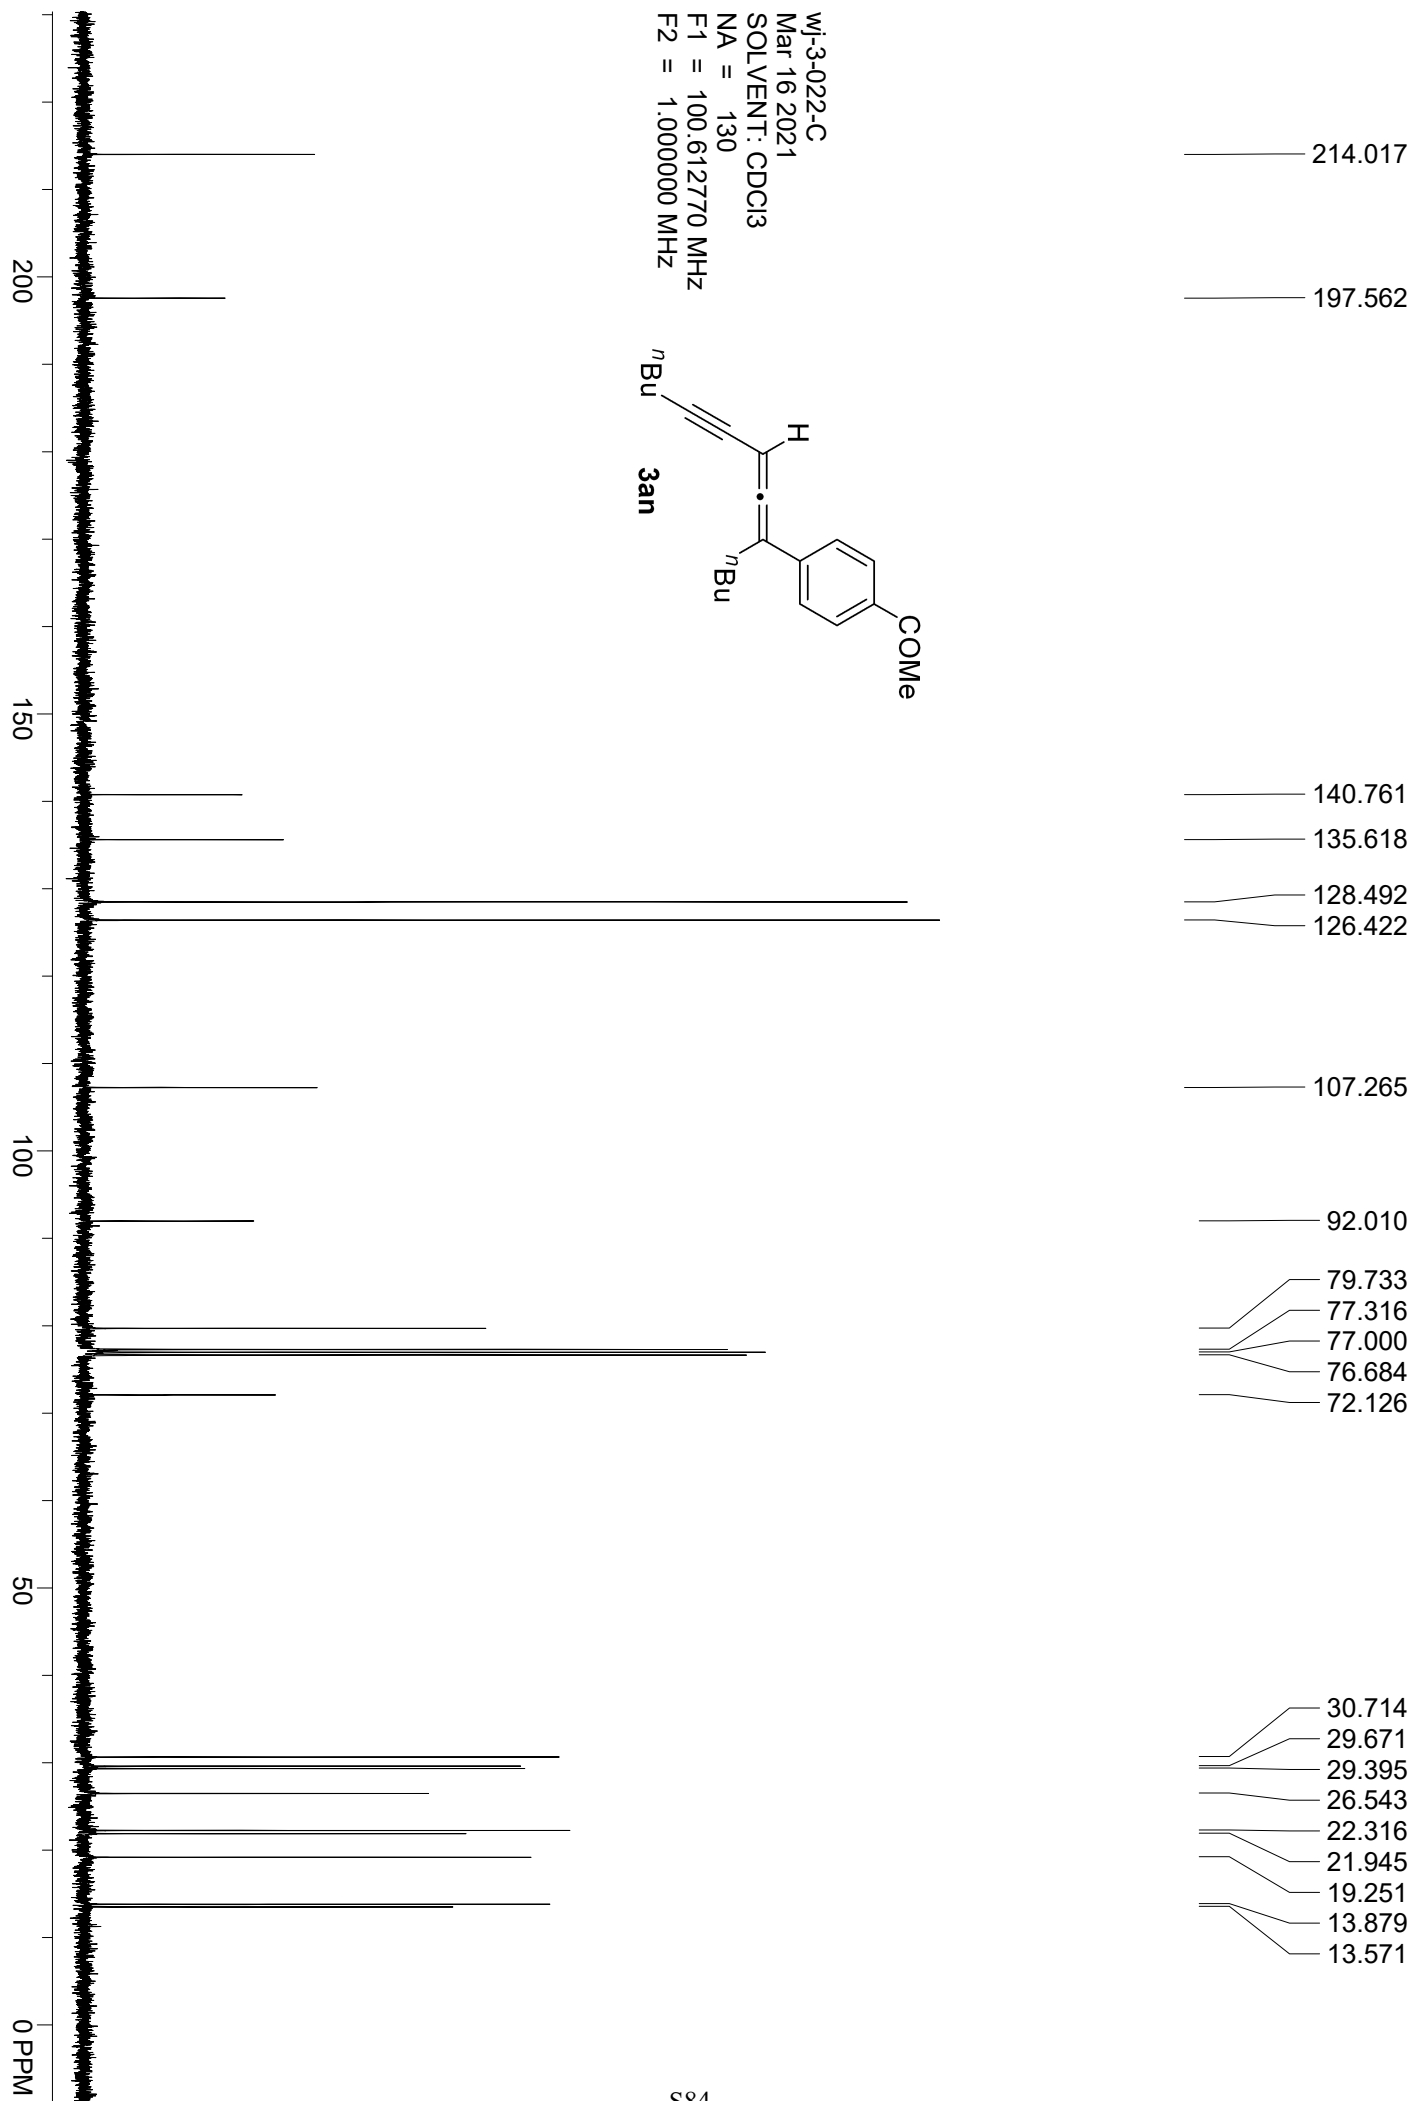



7.807  
7.789  
7.765  
7.753  
7.744  
7.571  
7.549  
7.464  
7.447  
7.441  
7.434  
7.425  
7.422  
7.404  
7.223  
5.803

2.608  
2.598  
2.590  
2.580  
2.571  
2.562  
2.553  
2.341  
2.336  
2.323  
2.318  
2.306  
2.301  
1.641  
1.623  
1.605  
1.586  
1.567  
1.544  
1.526  
1.506  
1.488  
1.469  
1.448  
1.429  
1.410  
1.392  
1.374  
0.978  
0.959  
0.941  
0.929  
0.911  
0.893  
-0.000

wj-3-026-H  
Mar 17 2021  
SOLVENT: CDCl3  
NA = 4  
F1 = 400.130035 MHz  
F2 = 1.000000 MHz

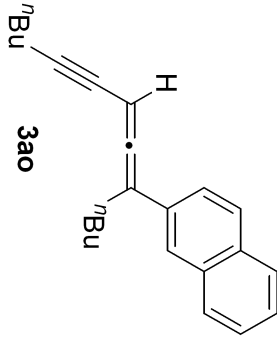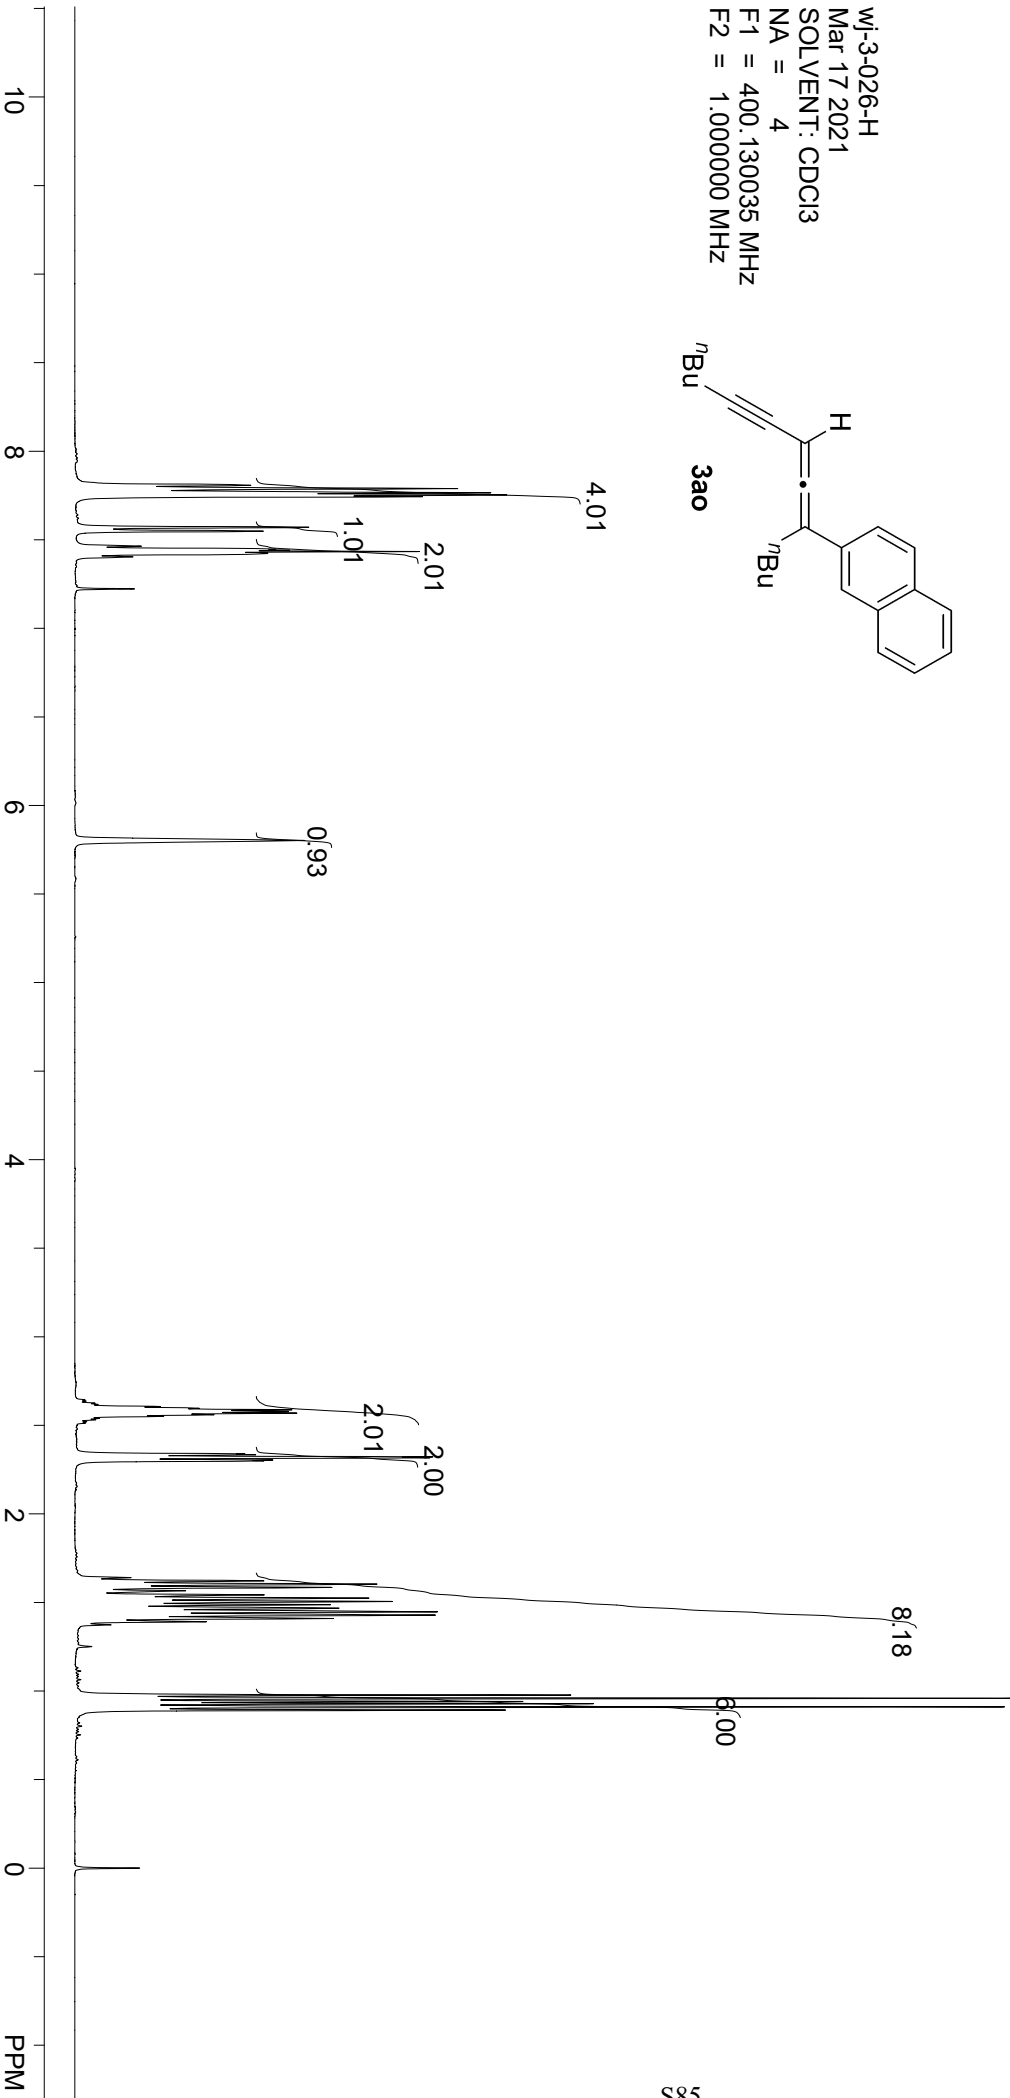

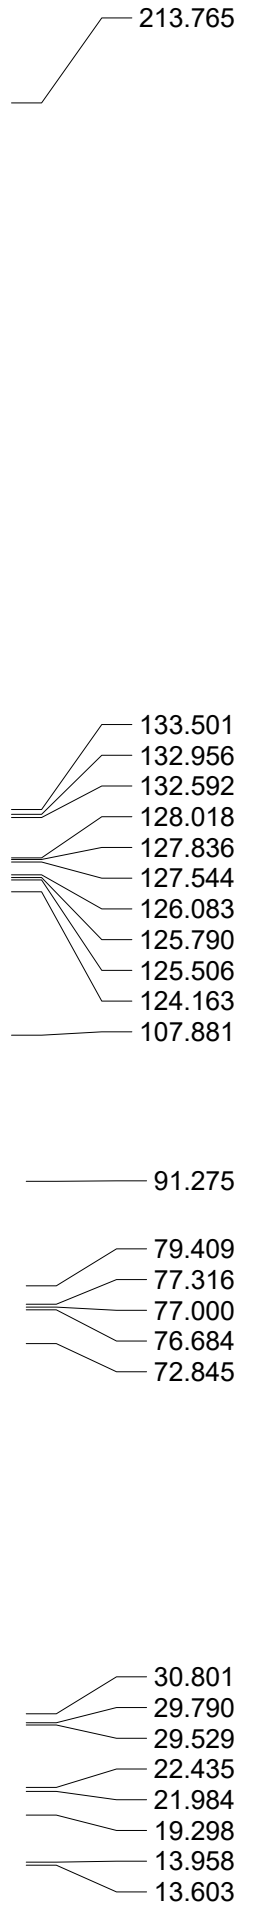

WJ-3-026-C  
 Mar 17 2021  
 SOLVENT: CDCl3  
 NA = 290  
 F1 = 100.612770 MHz  
 F2 = 1.000000 MHz

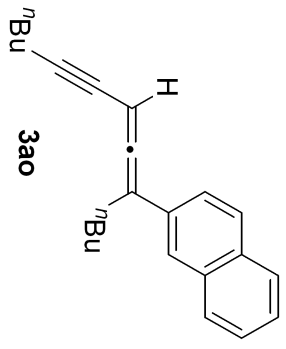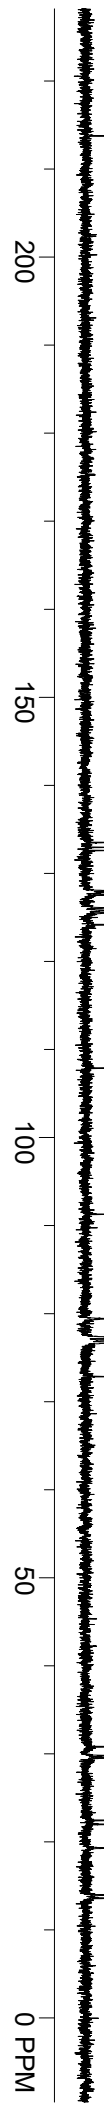

wj-3-025-H  
 Mar 16 2021  
 SOLVENT: CDCl3  
 NA = 4  
 F1 = 400.130005 MHz  
 F2 = 1.000000 MHz

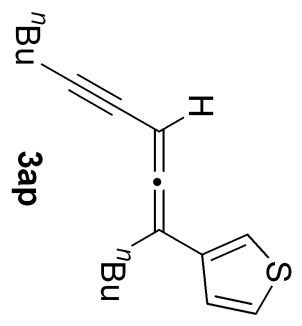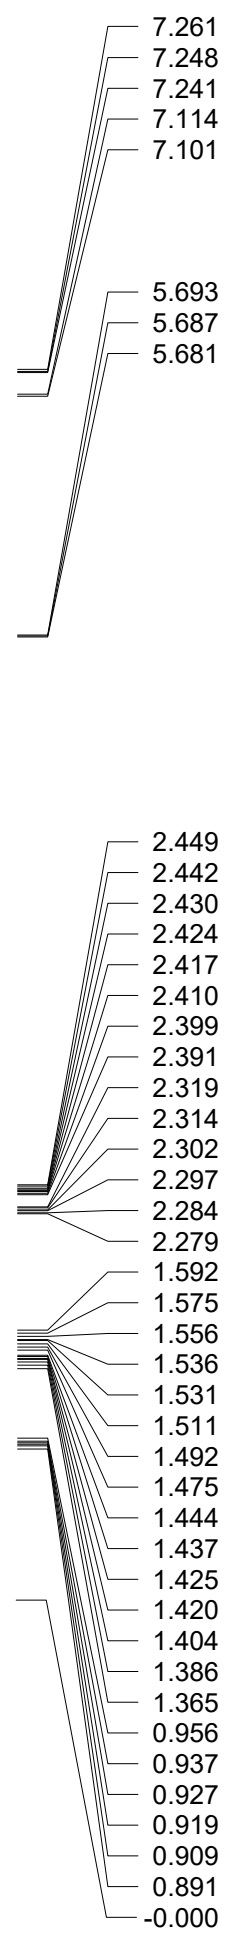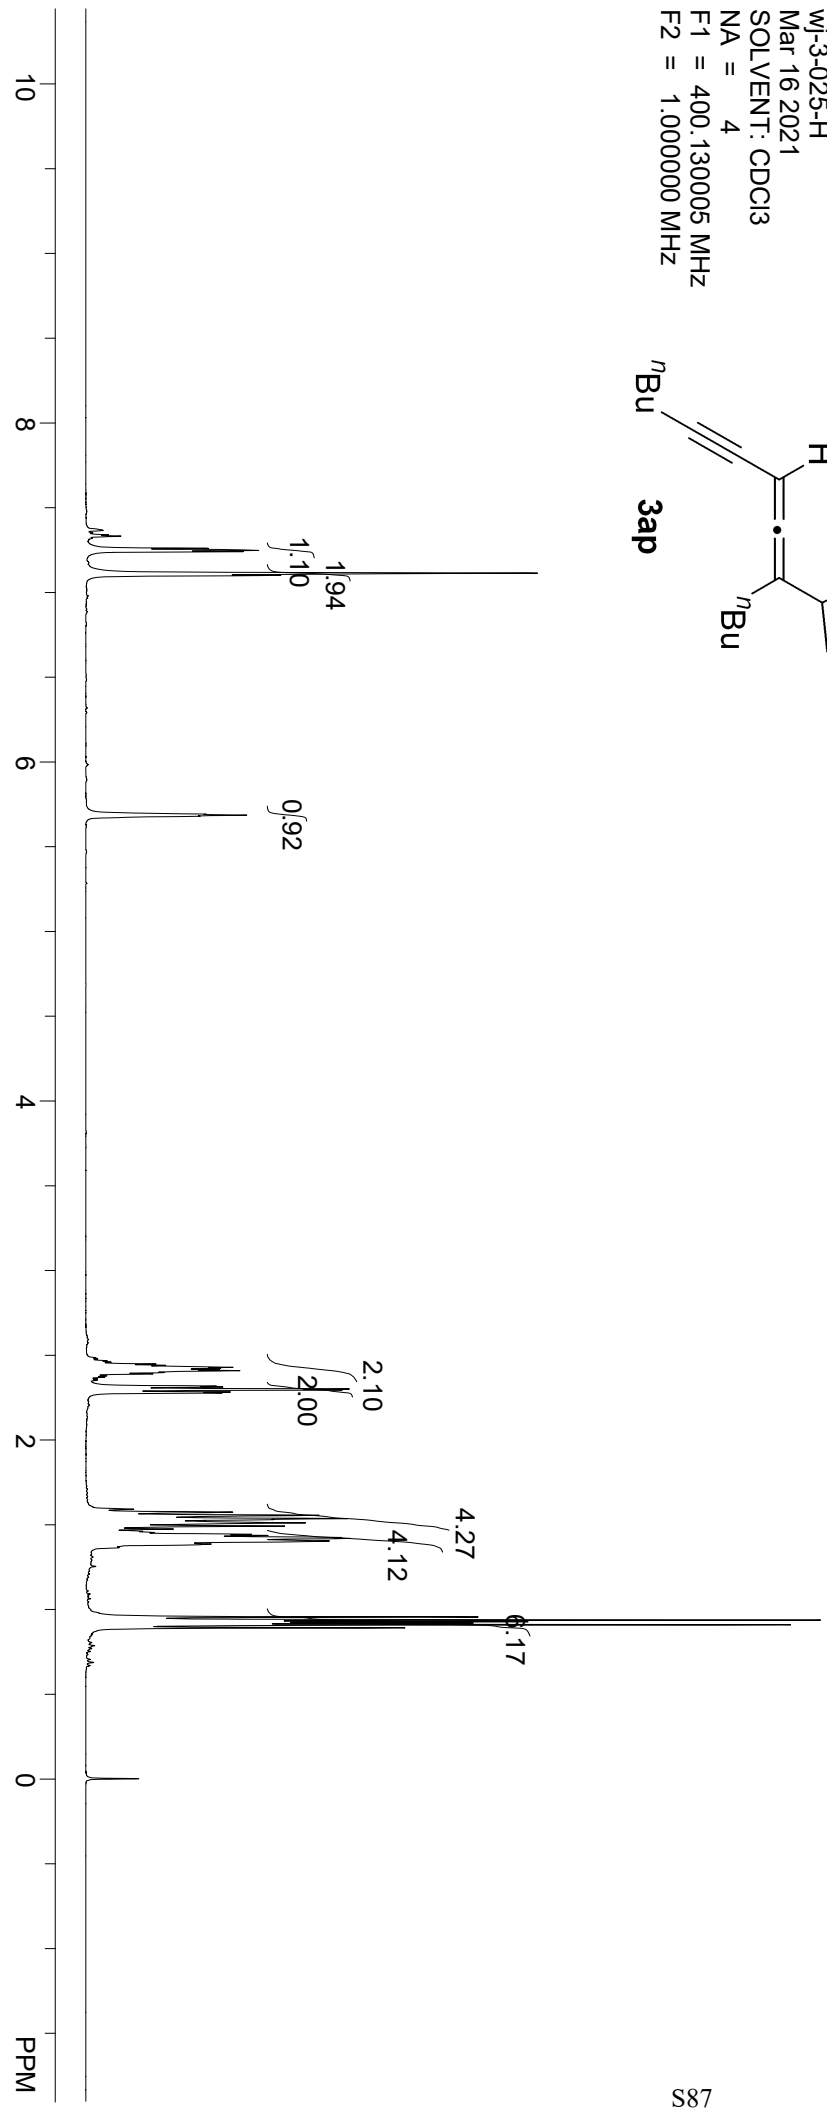

wj-3-025-C  
Mar 16 2021  
SOLVENT: CDCl3  
NA = 200  
F1 = 100.612770 MHz  
F2 = 1.000000 MHz

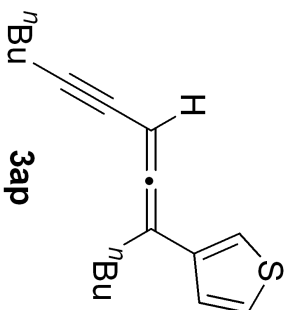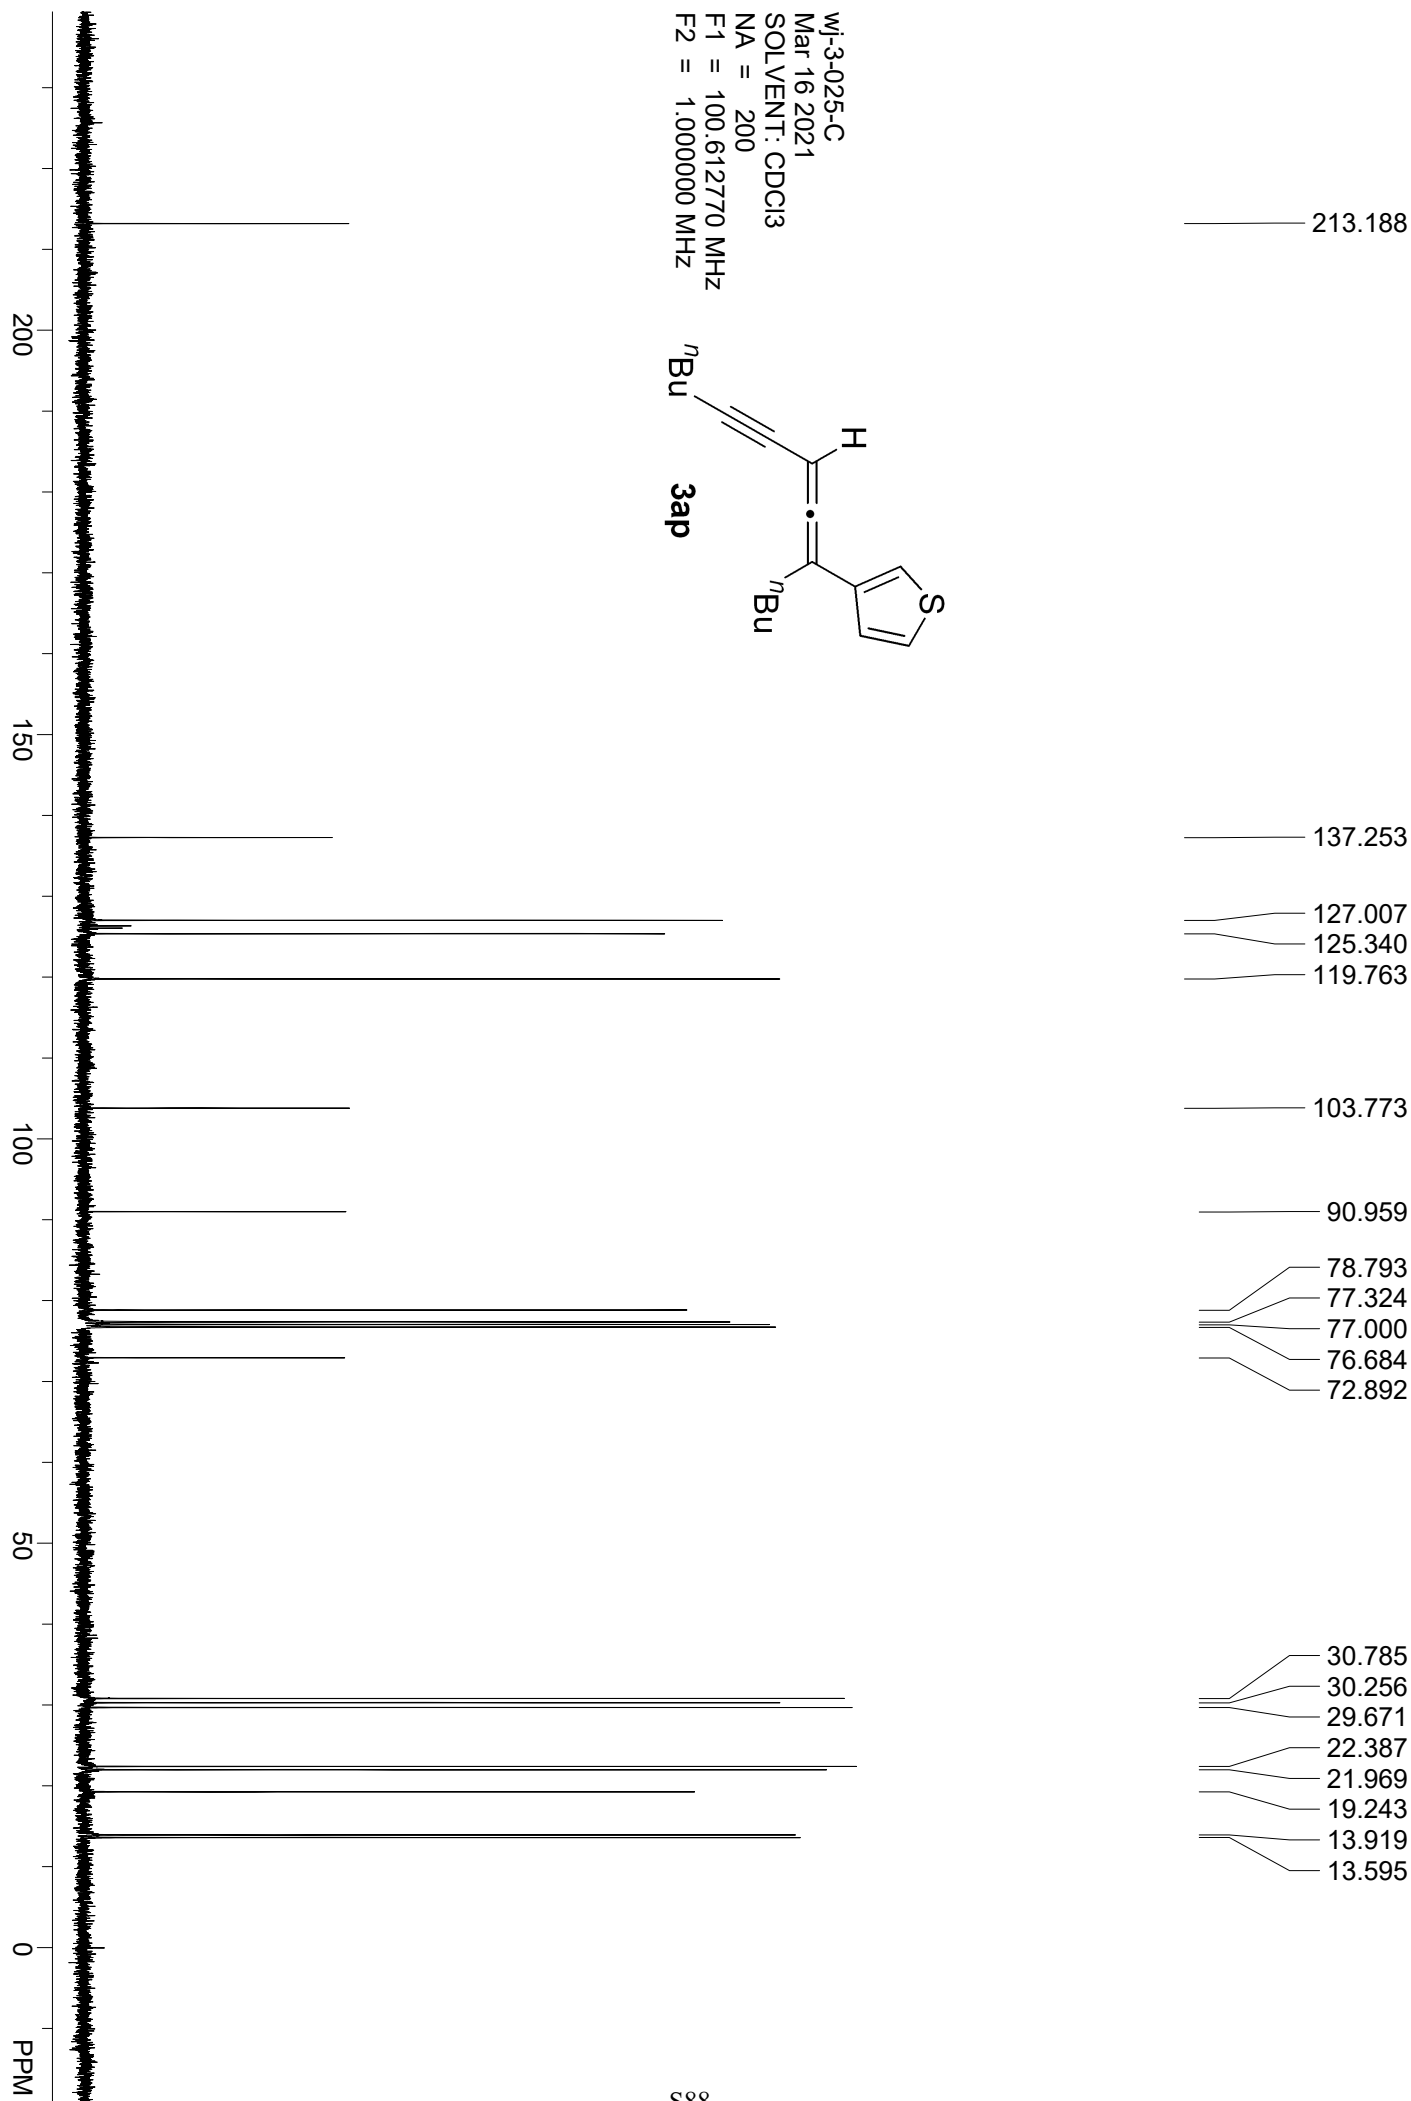

wf-3-027-H  
Mar 17 2021  
SOLVENT: CDCl3  
NA = 4  
F1 = 400.130005 MHz  
F2 = 1.000000 MHz

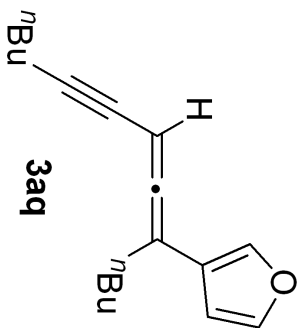

7.383  
7.357  
7.255

6.388

5.660

2.319  
2.302  
2.284

1.578  
1.560  
1.541  
1.532  
1.522  
1.513  
1.506

1.494  
1.477  
1.456  
1.438  
1.419  
1.407

1.389  
1.371  
1.354  
0.948  
0.929  
0.911  
0.893  
-0.000

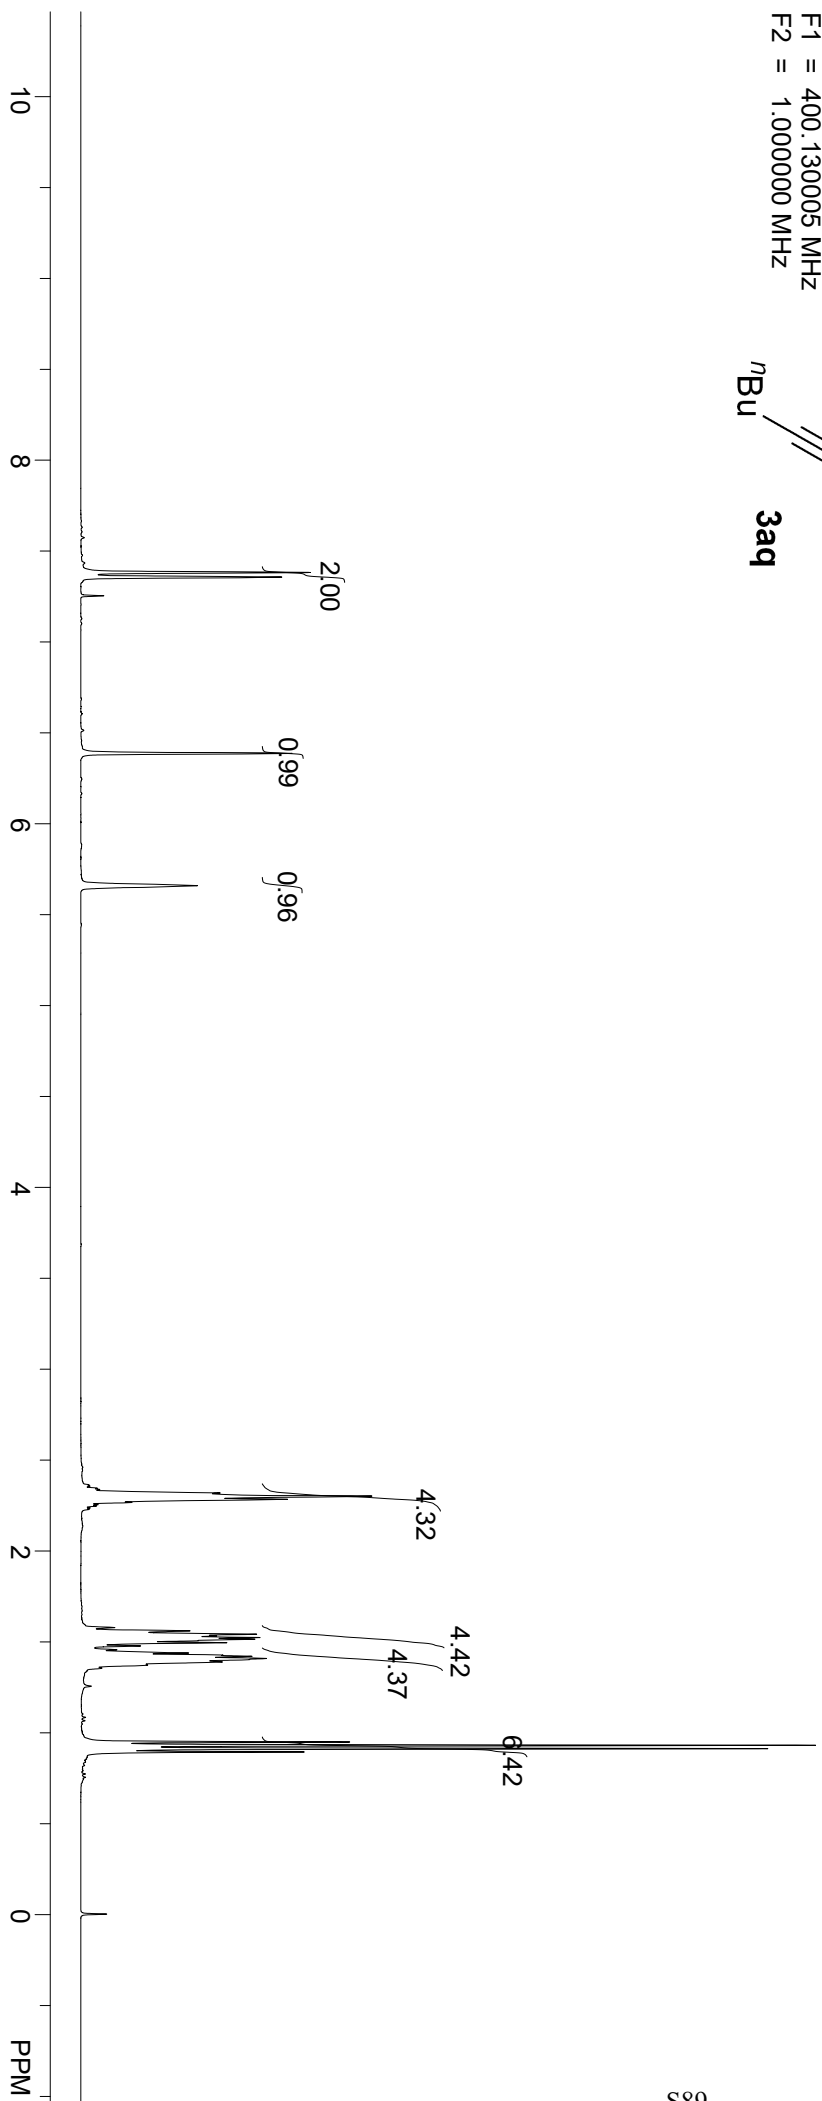

WJ-3-027-C  
Mar 17 2021  
SOLVENT: CDCl3  
NA = 200  
F1 = 100.612770 MHz  
F2 = 1.000000 MHz

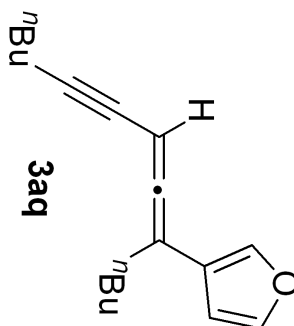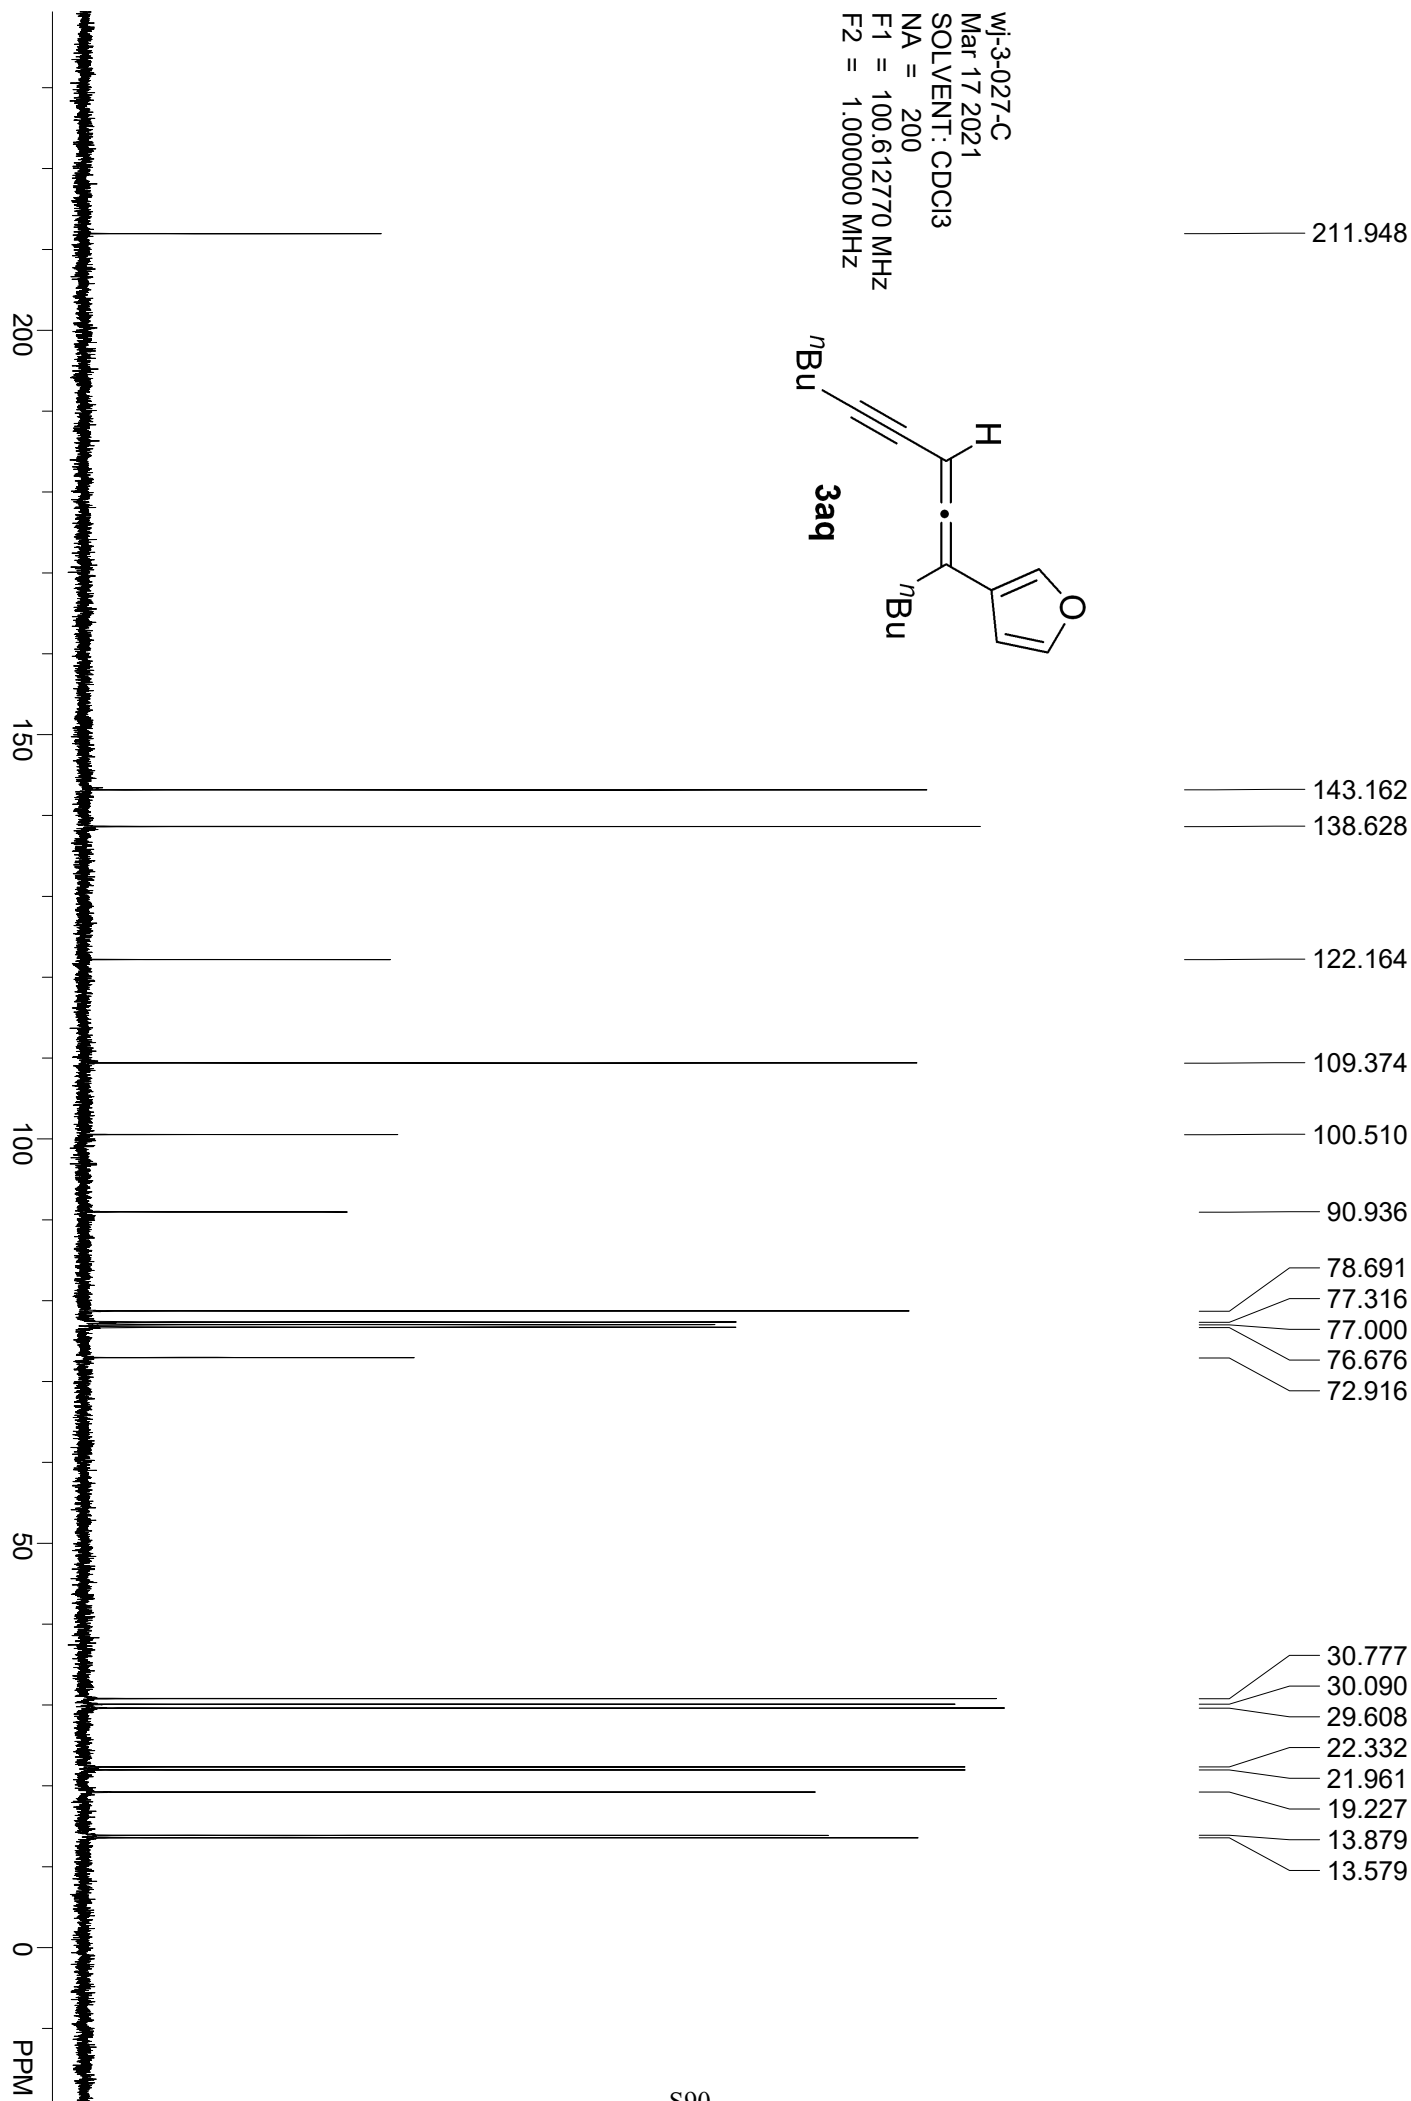

wj-3-036-H  
Mar 24 2021  
SOLVENT: CDCl3  
NA = 4  
F1 = 400.130005 MHz  
F2 = 1.000000 MHz

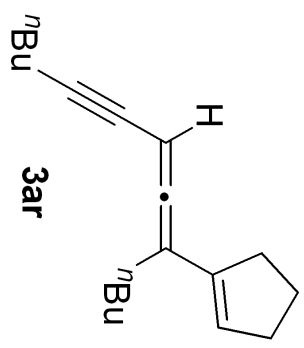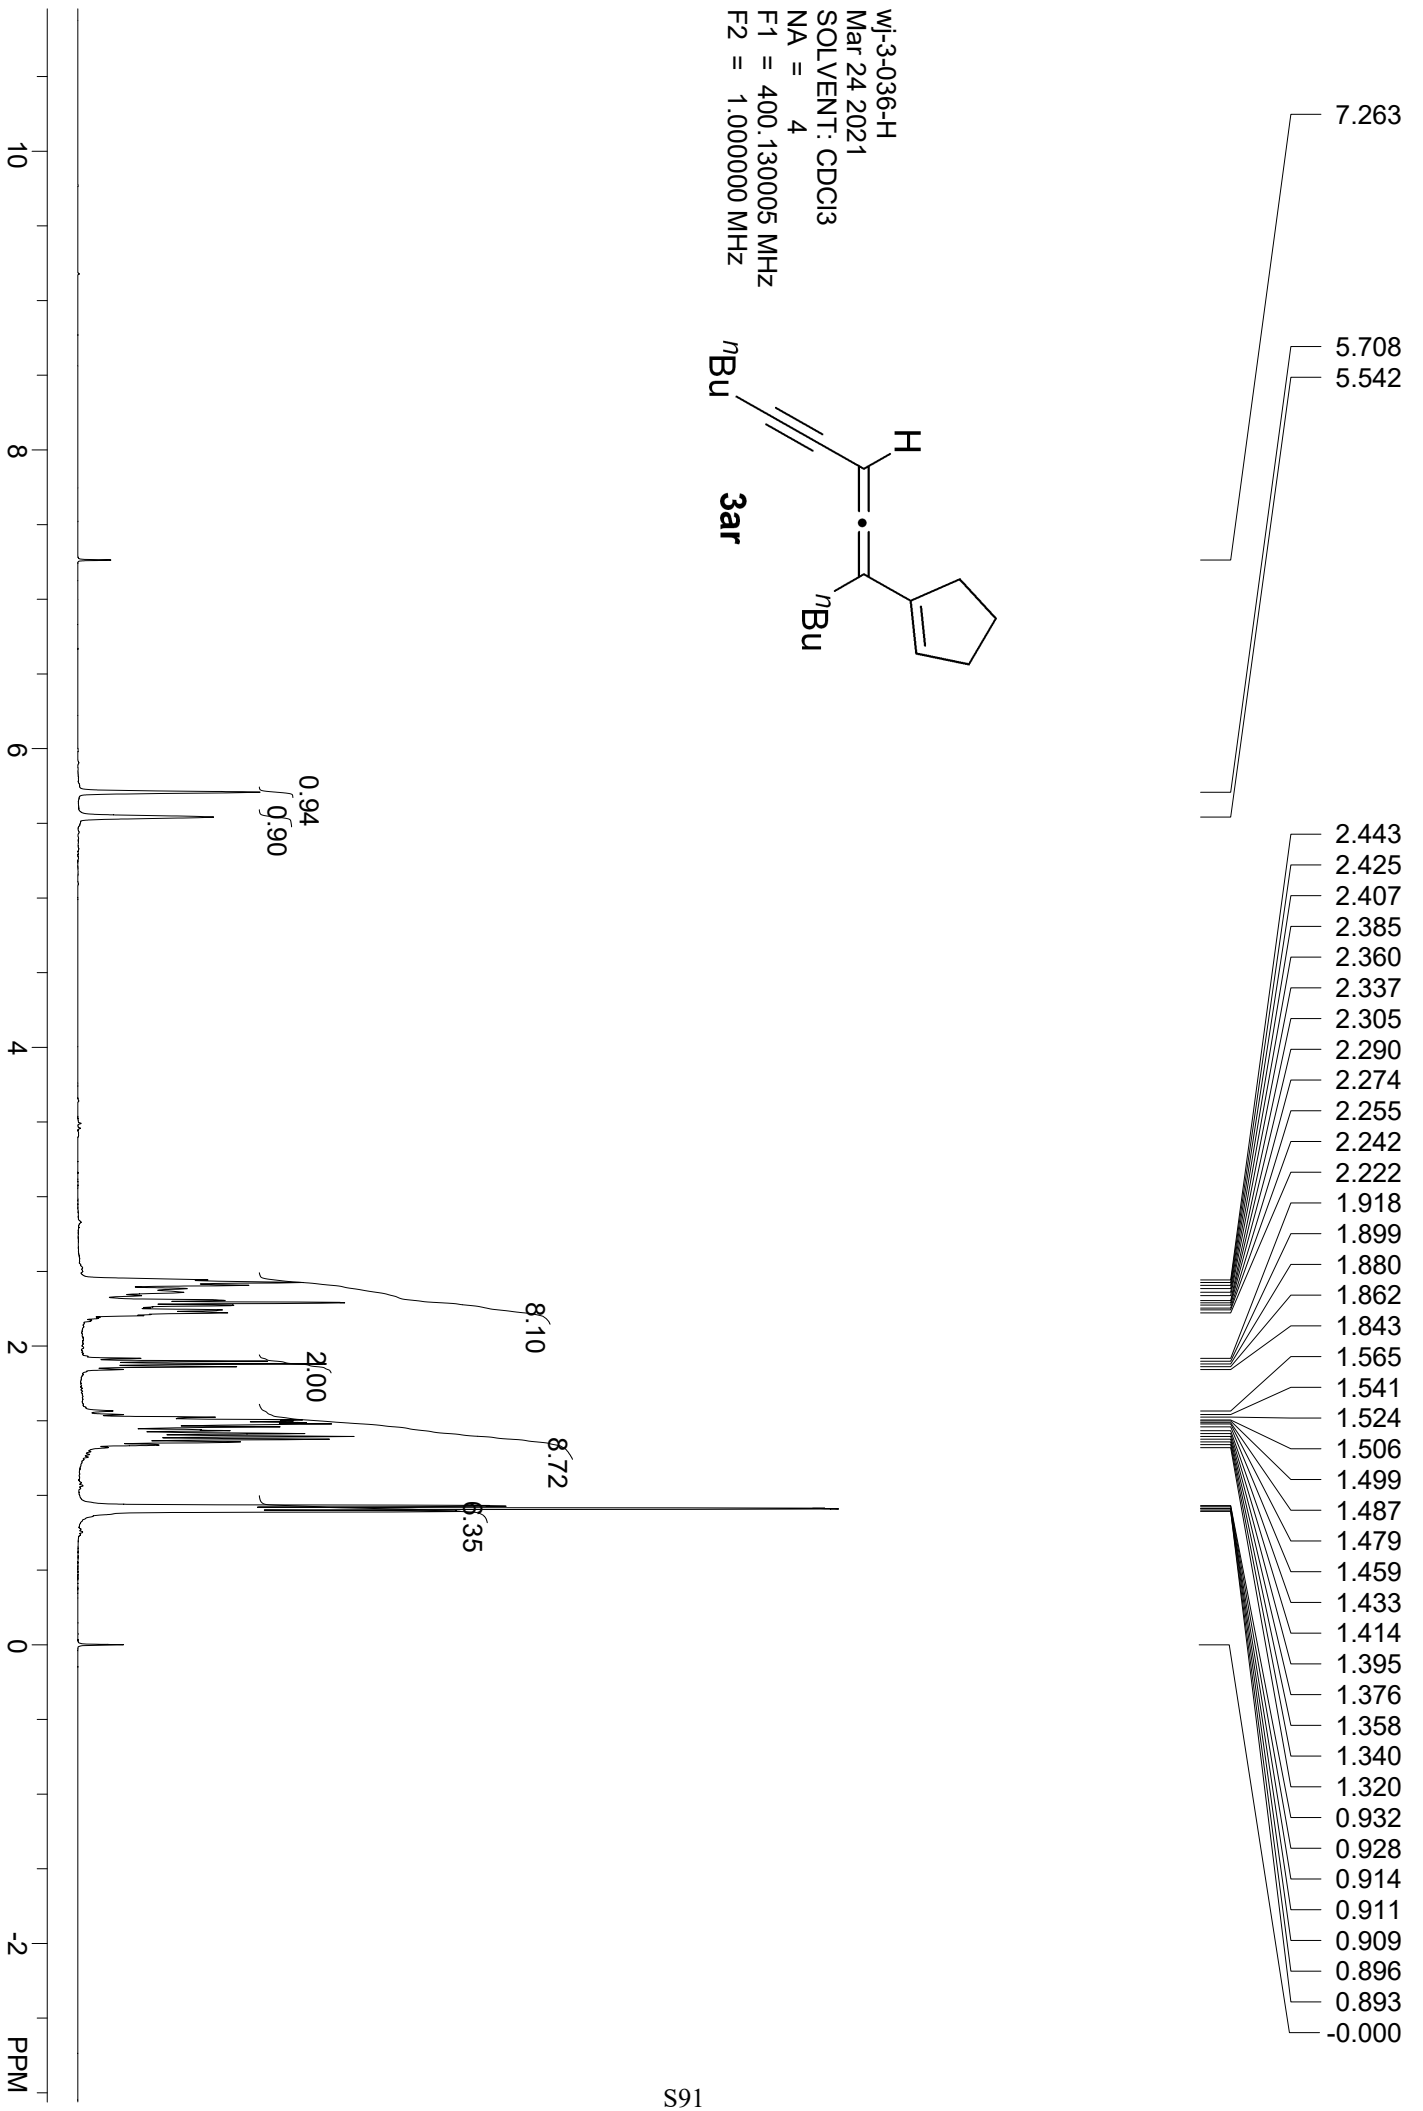

wj-3-036-C  
Mar 24 2021  
SOLVENT: CDCl3  
NA = 300  
F1 = 100.612770 MHz  
F2 = 1.000000 MHz

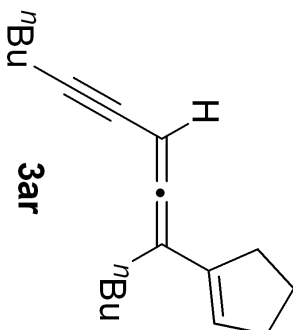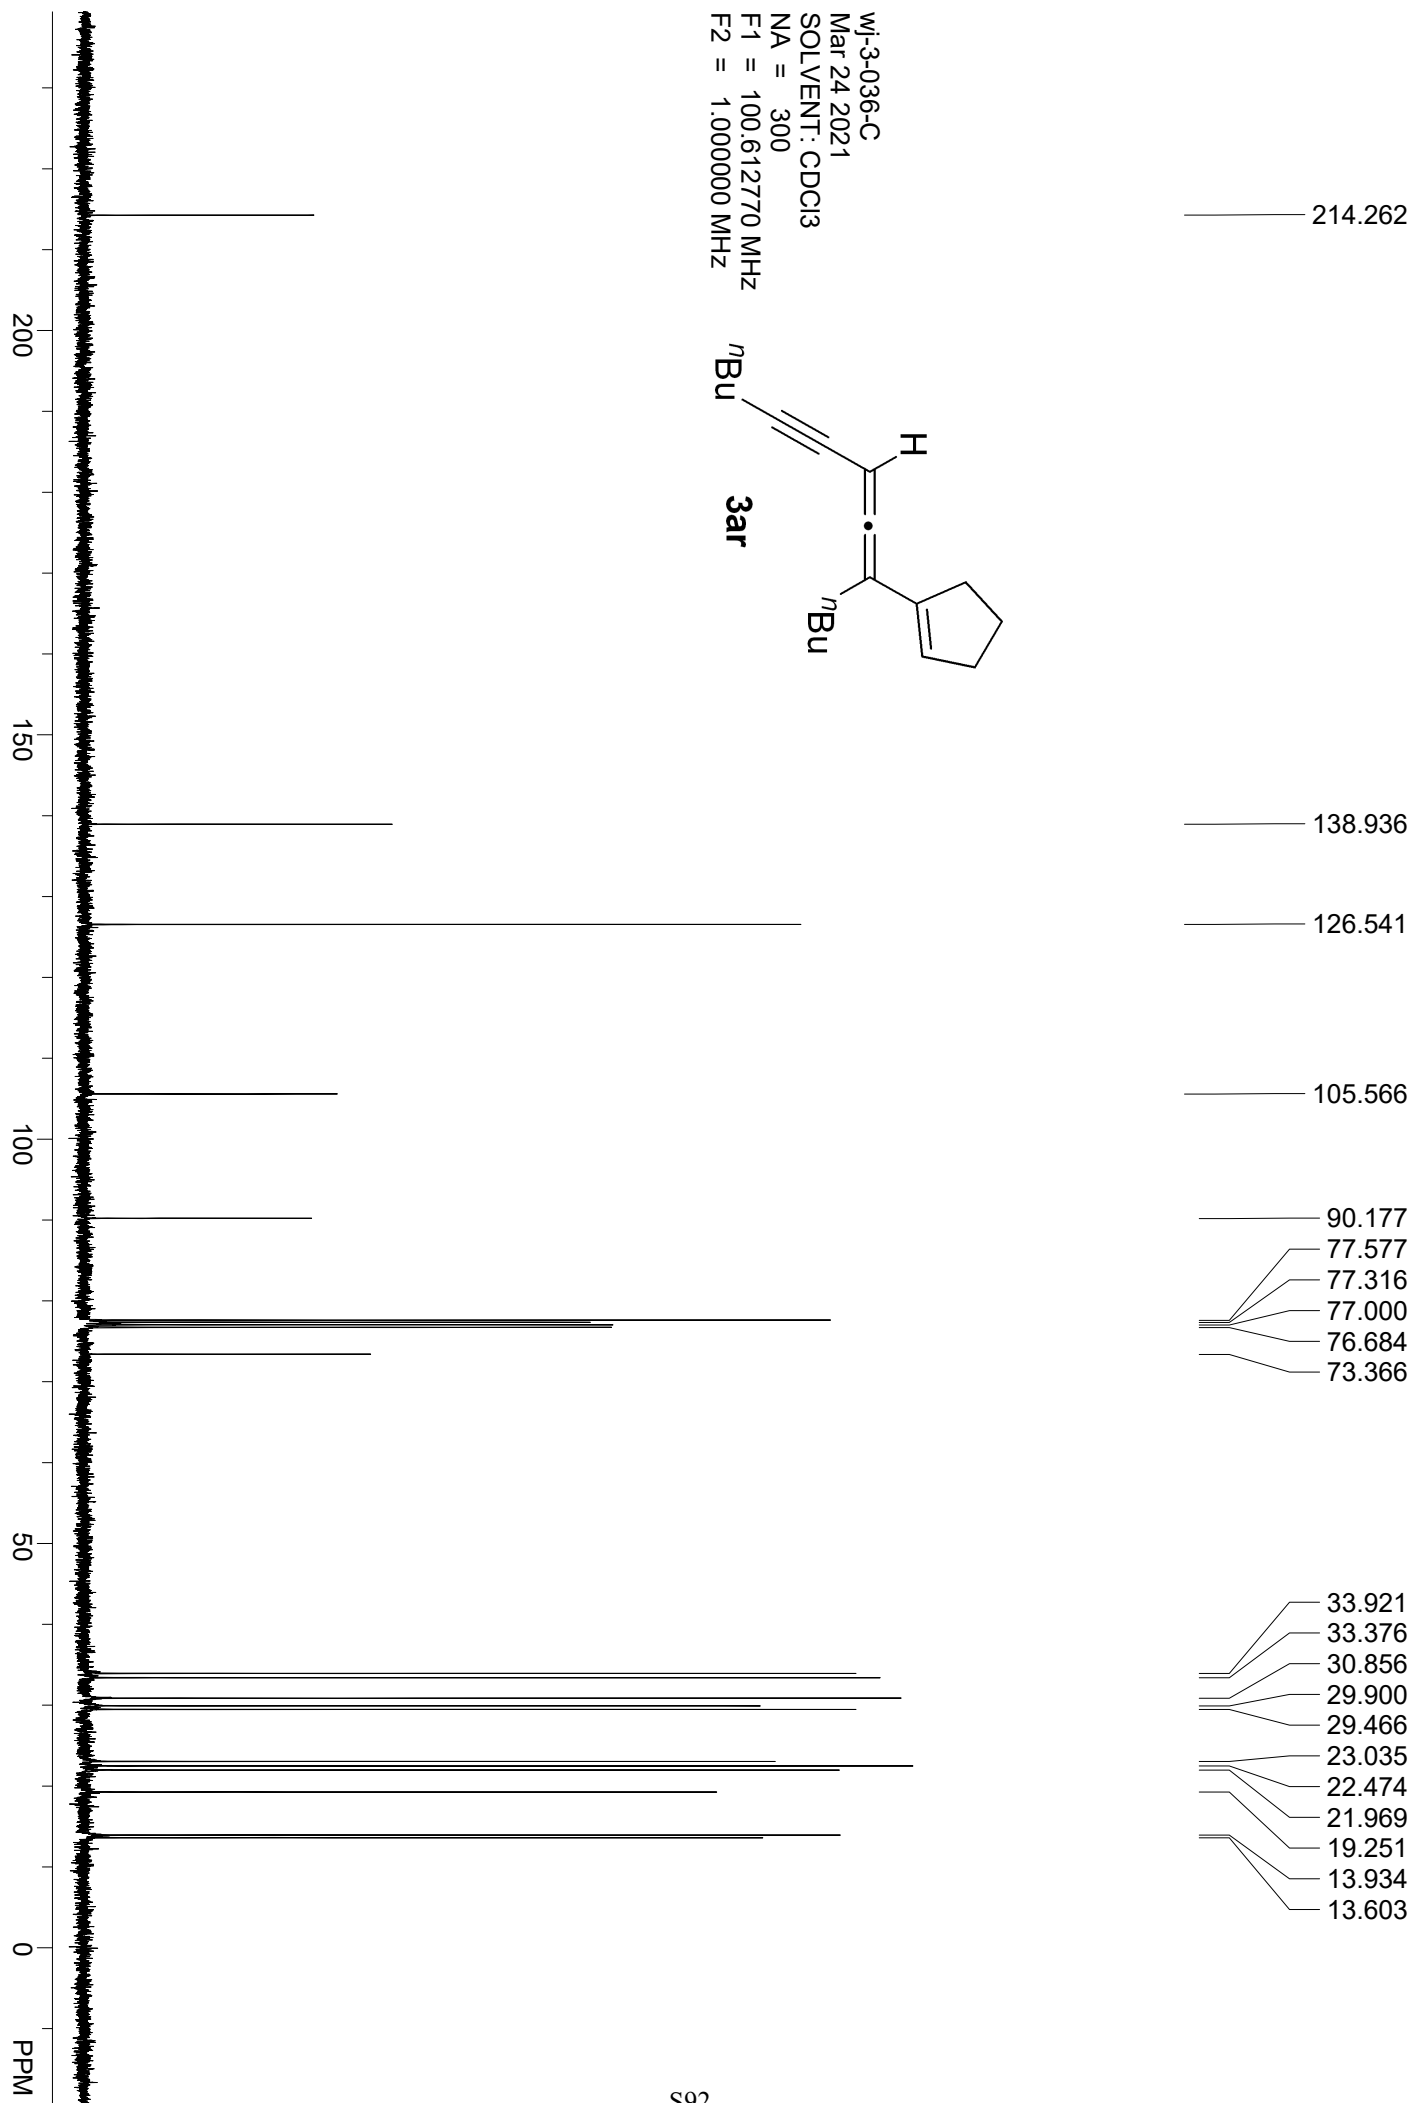



wj-3-107-H  
May 15 2021  
SOLVENT: CDCl3  
NA = 4  
F1 = 400.130005 MHz  
F2 = 1.000000 MHz

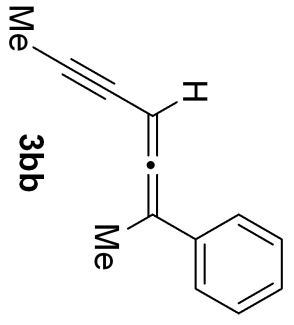

7.403  
7.384  
7.345  
7.326  
7.307  
7.241  
7.223  
7.205

5.663

2.134  
2.128  
1.947  
1.942

-0.000

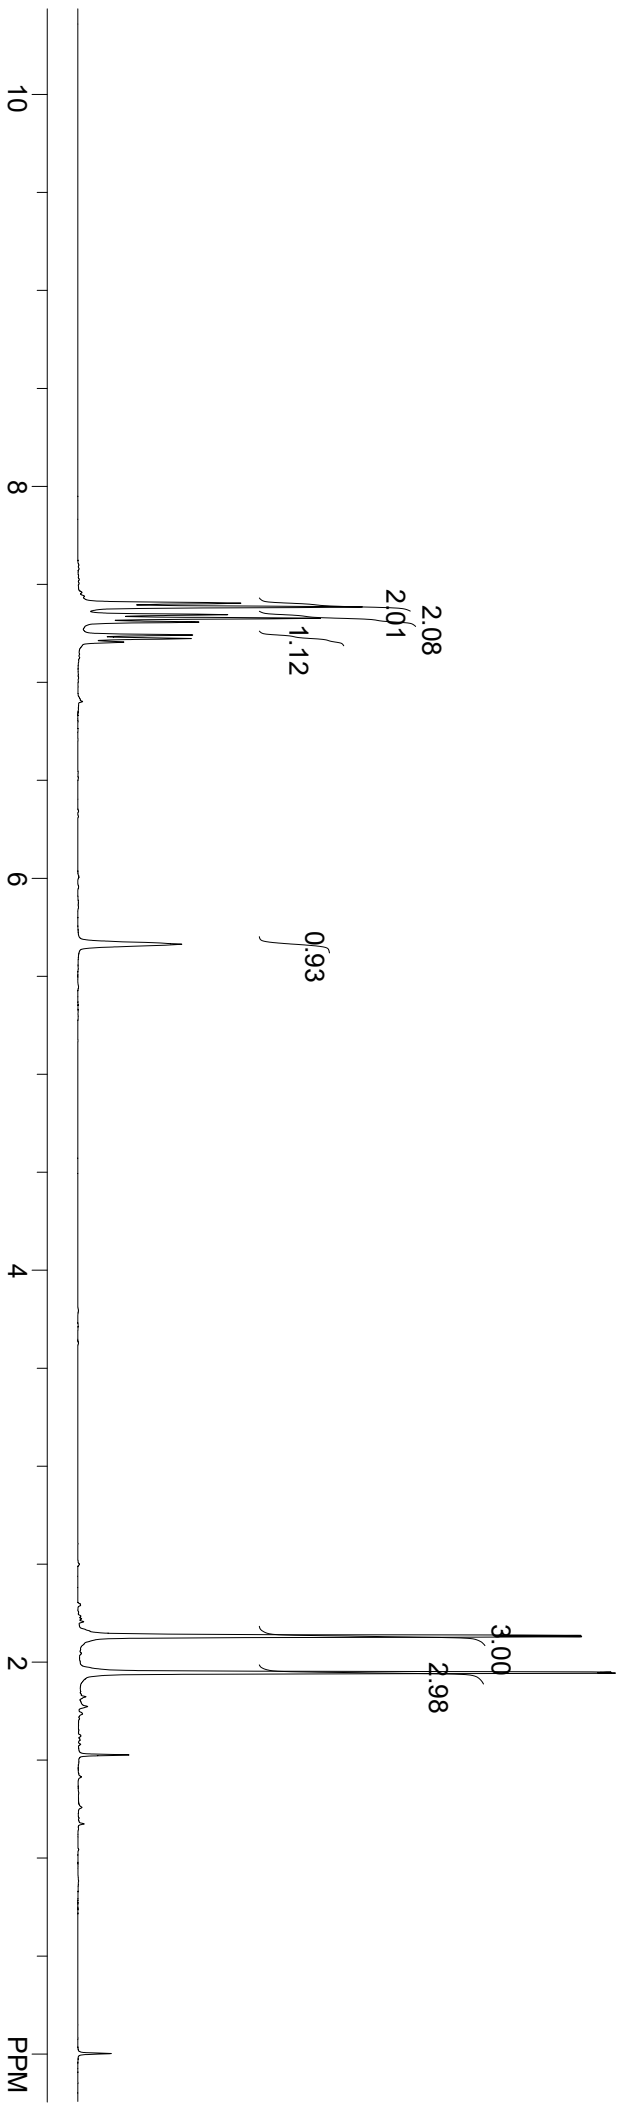

wj-3-107-C  
May 15 2021  
SOLVENT: CDCl3  
NA = 250  
F1 = 100.612770 MHz  
F2 = 1.000000 MHz

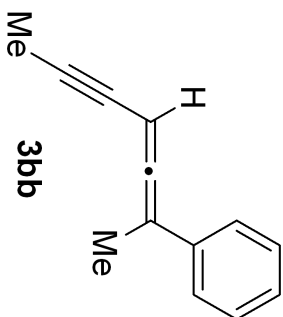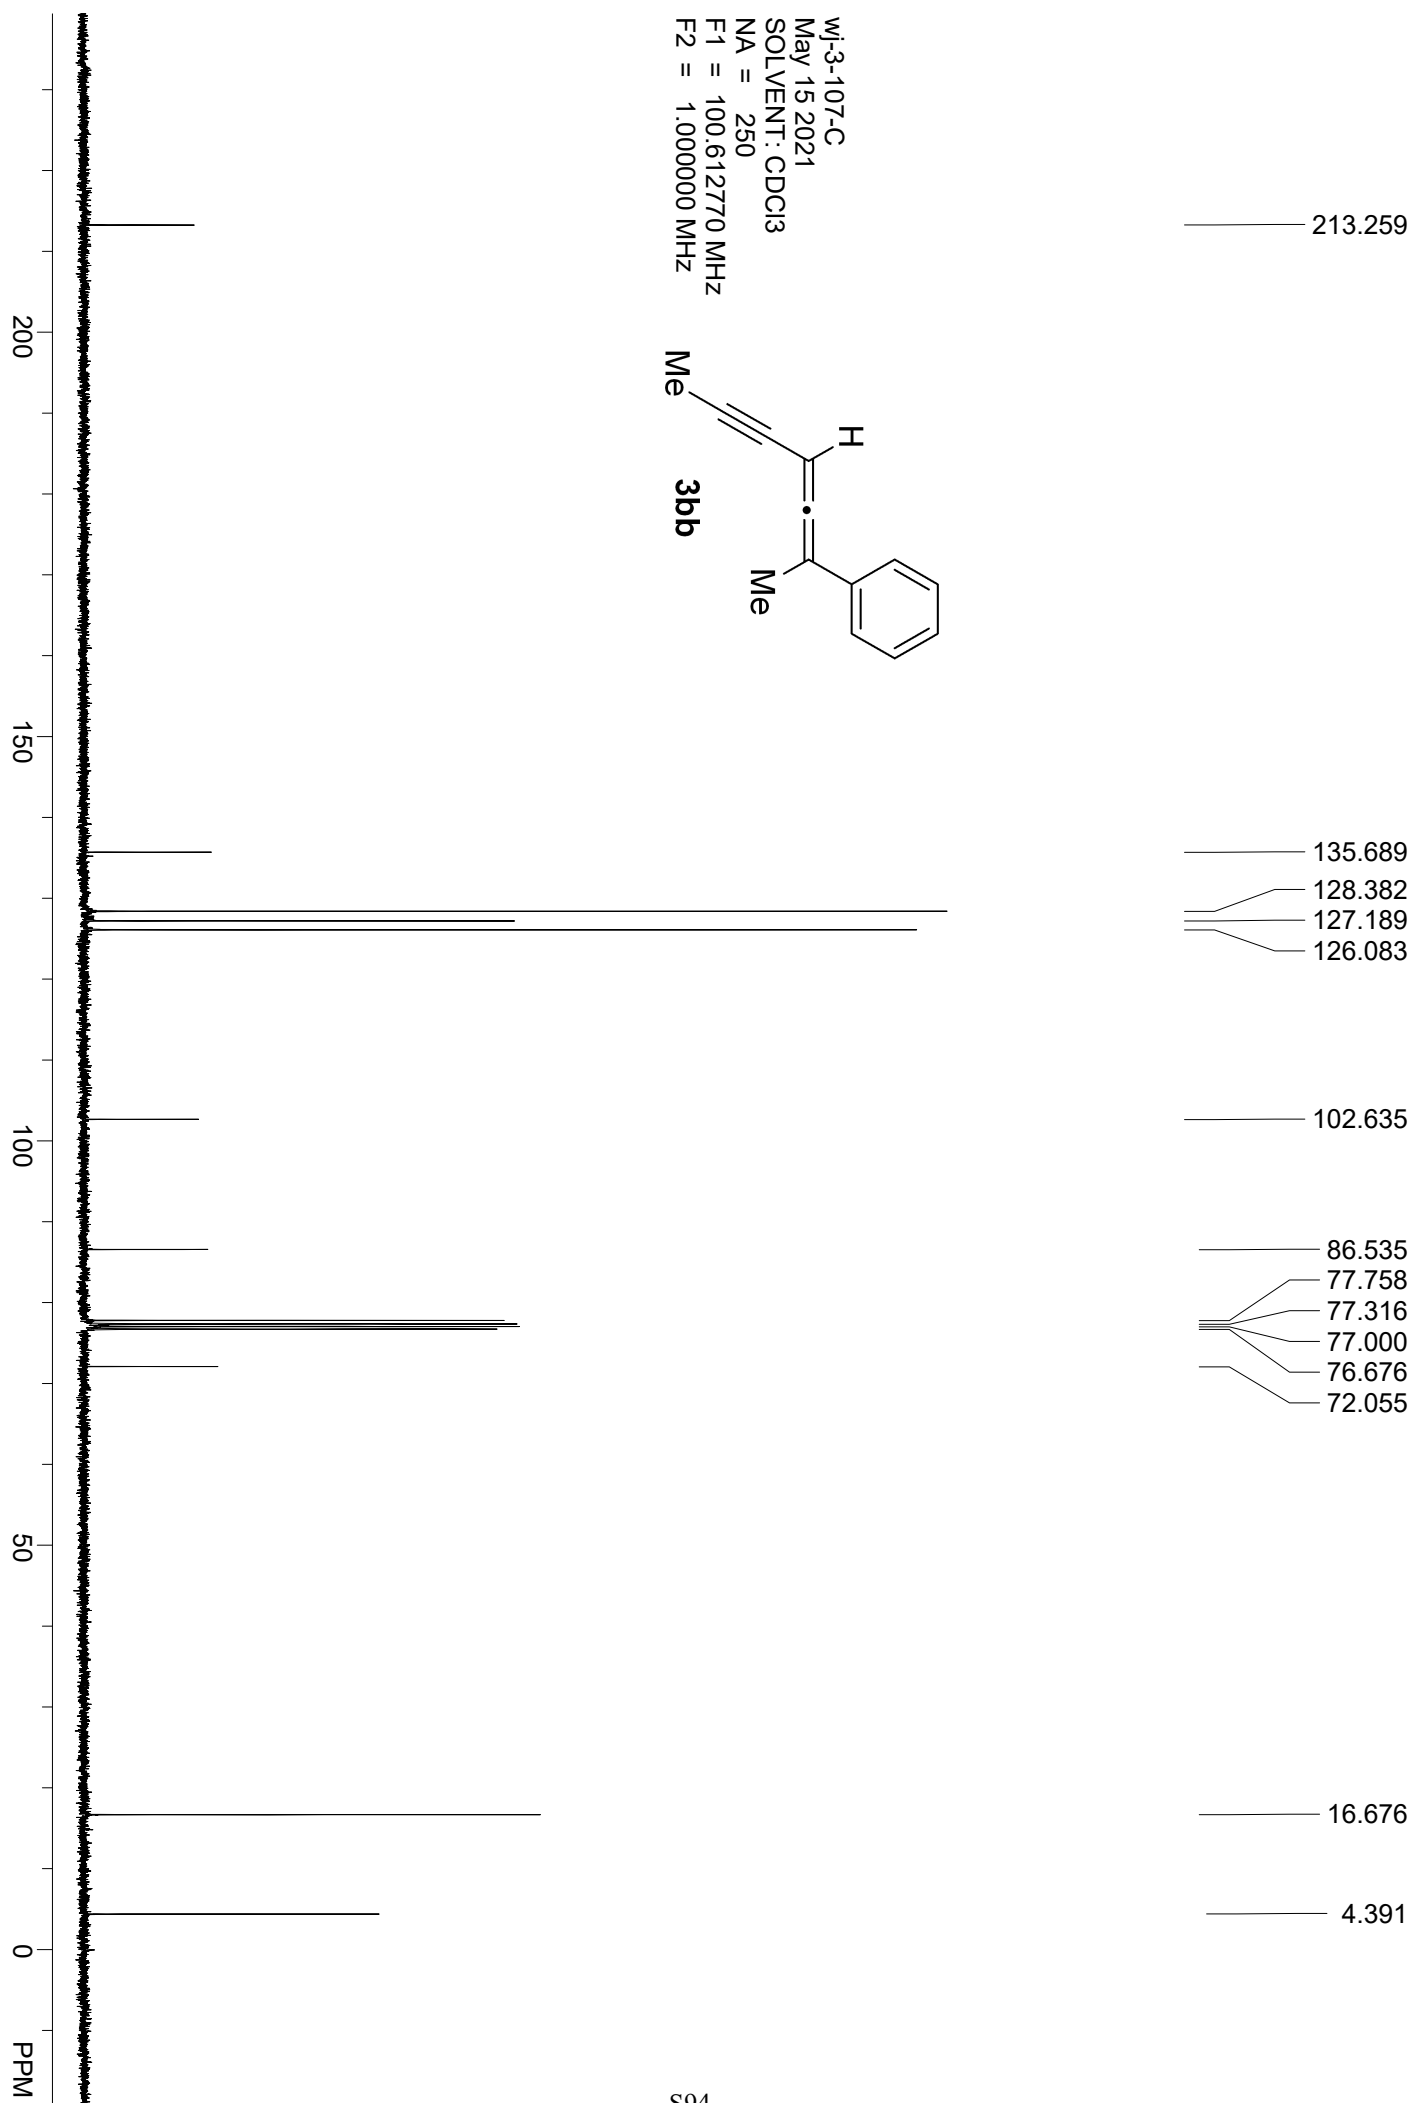

wf-3-085-H  
Apr 28 2021  
SOLVENT: CDCl3  
NA = 4  
F1 = 400.130005 MHz  
F2 = 1.000000 MHz

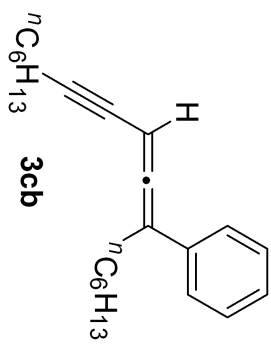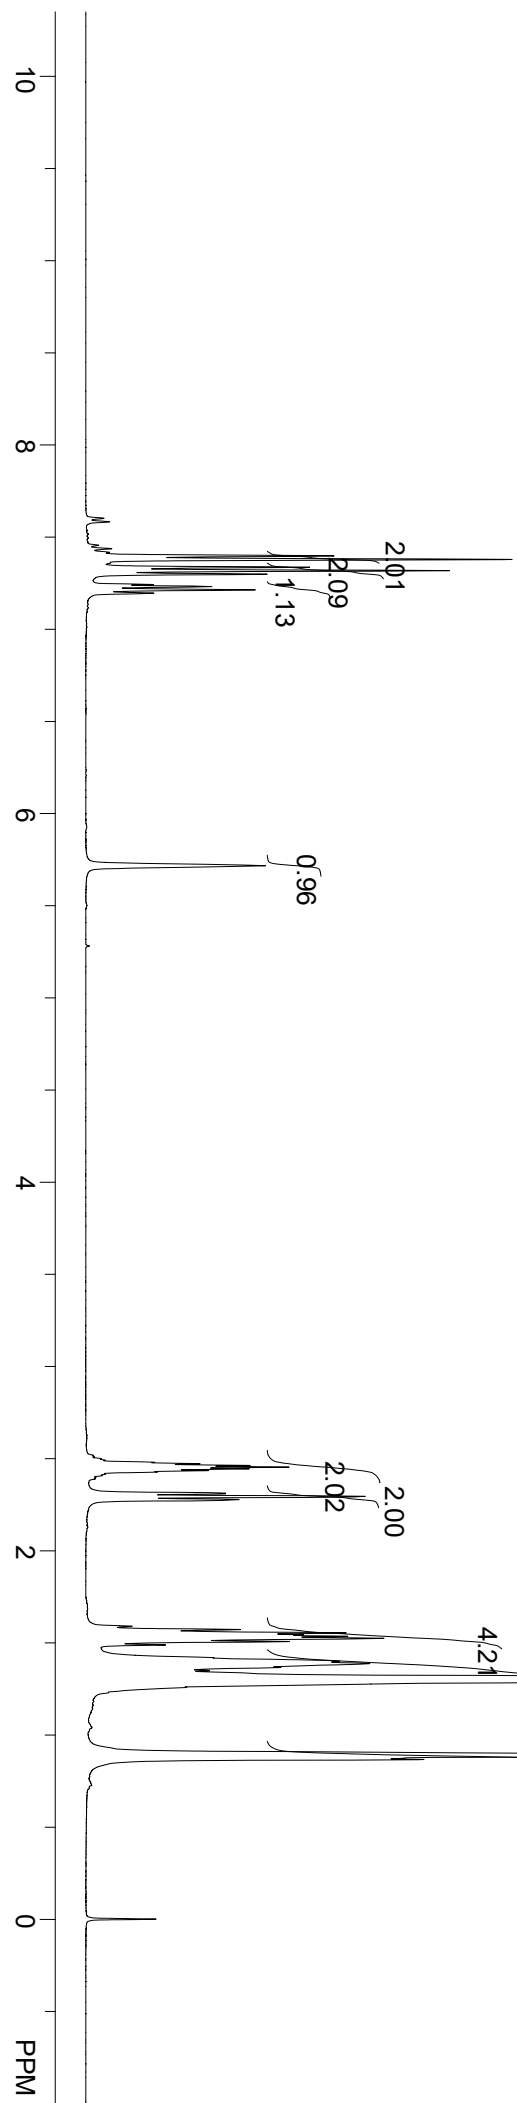

- 7.398
- 7.379
- 7.336
- 7.318
- 7.299
- 7.242
- 7.232
- 7.214
- 7.196

5.718

- 2.481
- 2.473
- 2.464
- 2.455
- 2.445
- 2.436
- 2.428
- 2.313
- 2.310
- 2.296
- 2.278
- 1.591
- 1.572
- 1.554
- 1.544
- 1.536
- 1.525
- 1.507
- 1.489
- 1.420
- 1.400
- 1.388
- 1.367
- 1.320
- 1.303
- 1.295
- 1.286
- 0.899
- 0.884
- 0.867
- 0.000

213.077

135.689  
128.397  
127.086  
126.414

107.684

91.101  
79.022  
77.324  
77.000  
76.684  
72.924

31.686  
31.338  
29.877  
28.992  
28.707  
28.597  
27.593  
22.672  
22.530  
19.599  
14.077  
14.021

wj-3-085-C  
Apr 28 2021  
SOLVENT: CDCl3  
NA = 300  
F1 = 100.612770 MHz  
F2 = 1.000000 MHz

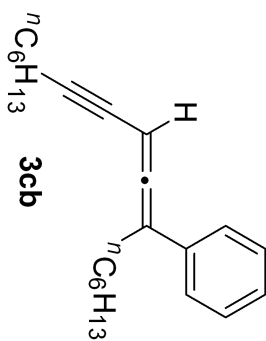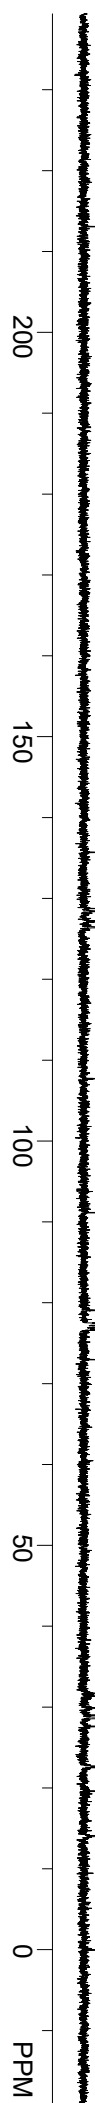

wf-3-086-H  
Apr 28 2021  
SOLVENT: CDCl3  
NA = 4  
F1 = 400.130005 MHz  
F2 = 1.000000 MHz

7.556  
7.536  
7.356  
7.337  
7.318  
7.254  
7.236  
7.217

5.711

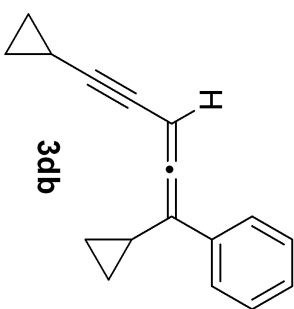

1.605  
1.593  
1.586  
1.573  
1.372  
1.355  
1.350  
1.337  
1.329  
1.323  
1.307  
0.926  
0.899  
0.894  
0.879  
0.874  
0.849  
0.808  
0.790  
0.782  
0.769  
0.752  
0.724  
0.713  
0.698  
0.618  
0.607  
0.589  
0.582  
0.578  
0.560  
0.556  
0.548  
0.543  
0.528  
-0.000

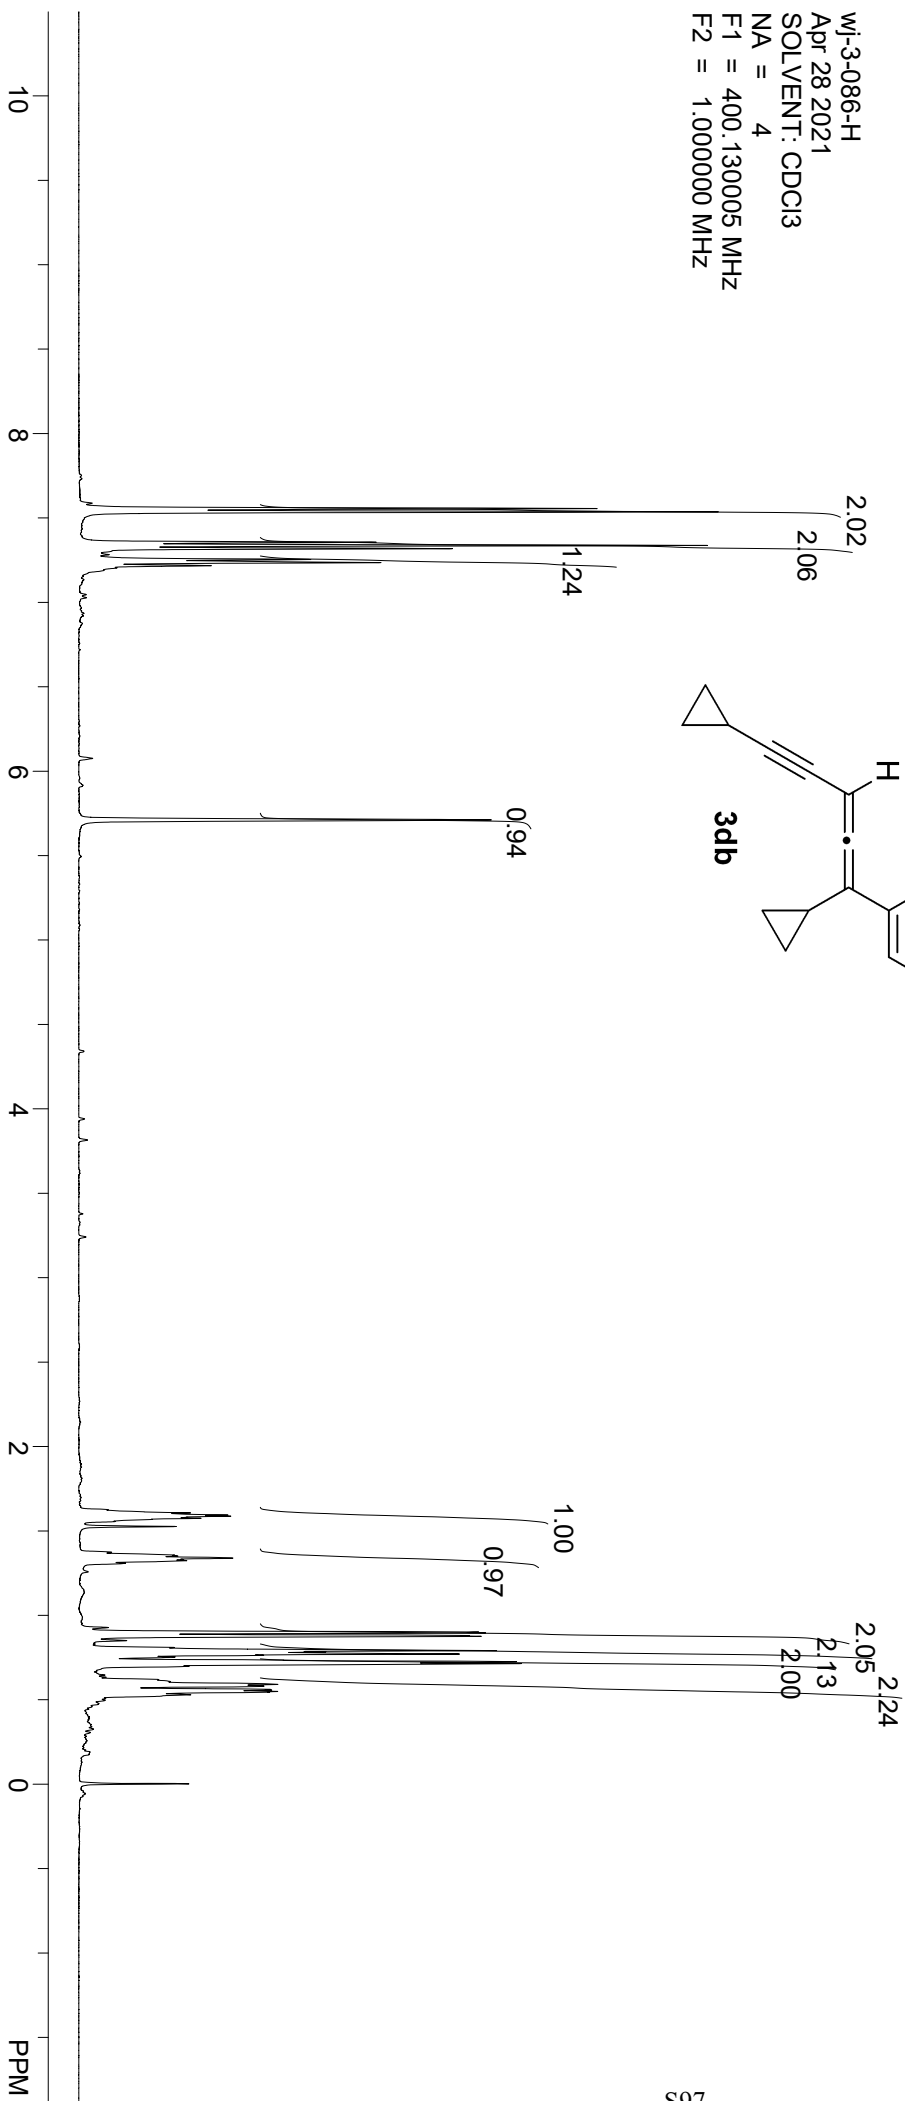

WJ-3-086-C  
Apr 28 2021  
SOLVENT: CDCl3  
NA = 300  
F1 = 100.612808 MHz  
F2 = 1.000000 MHz

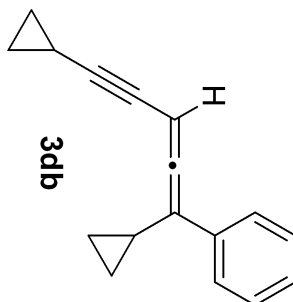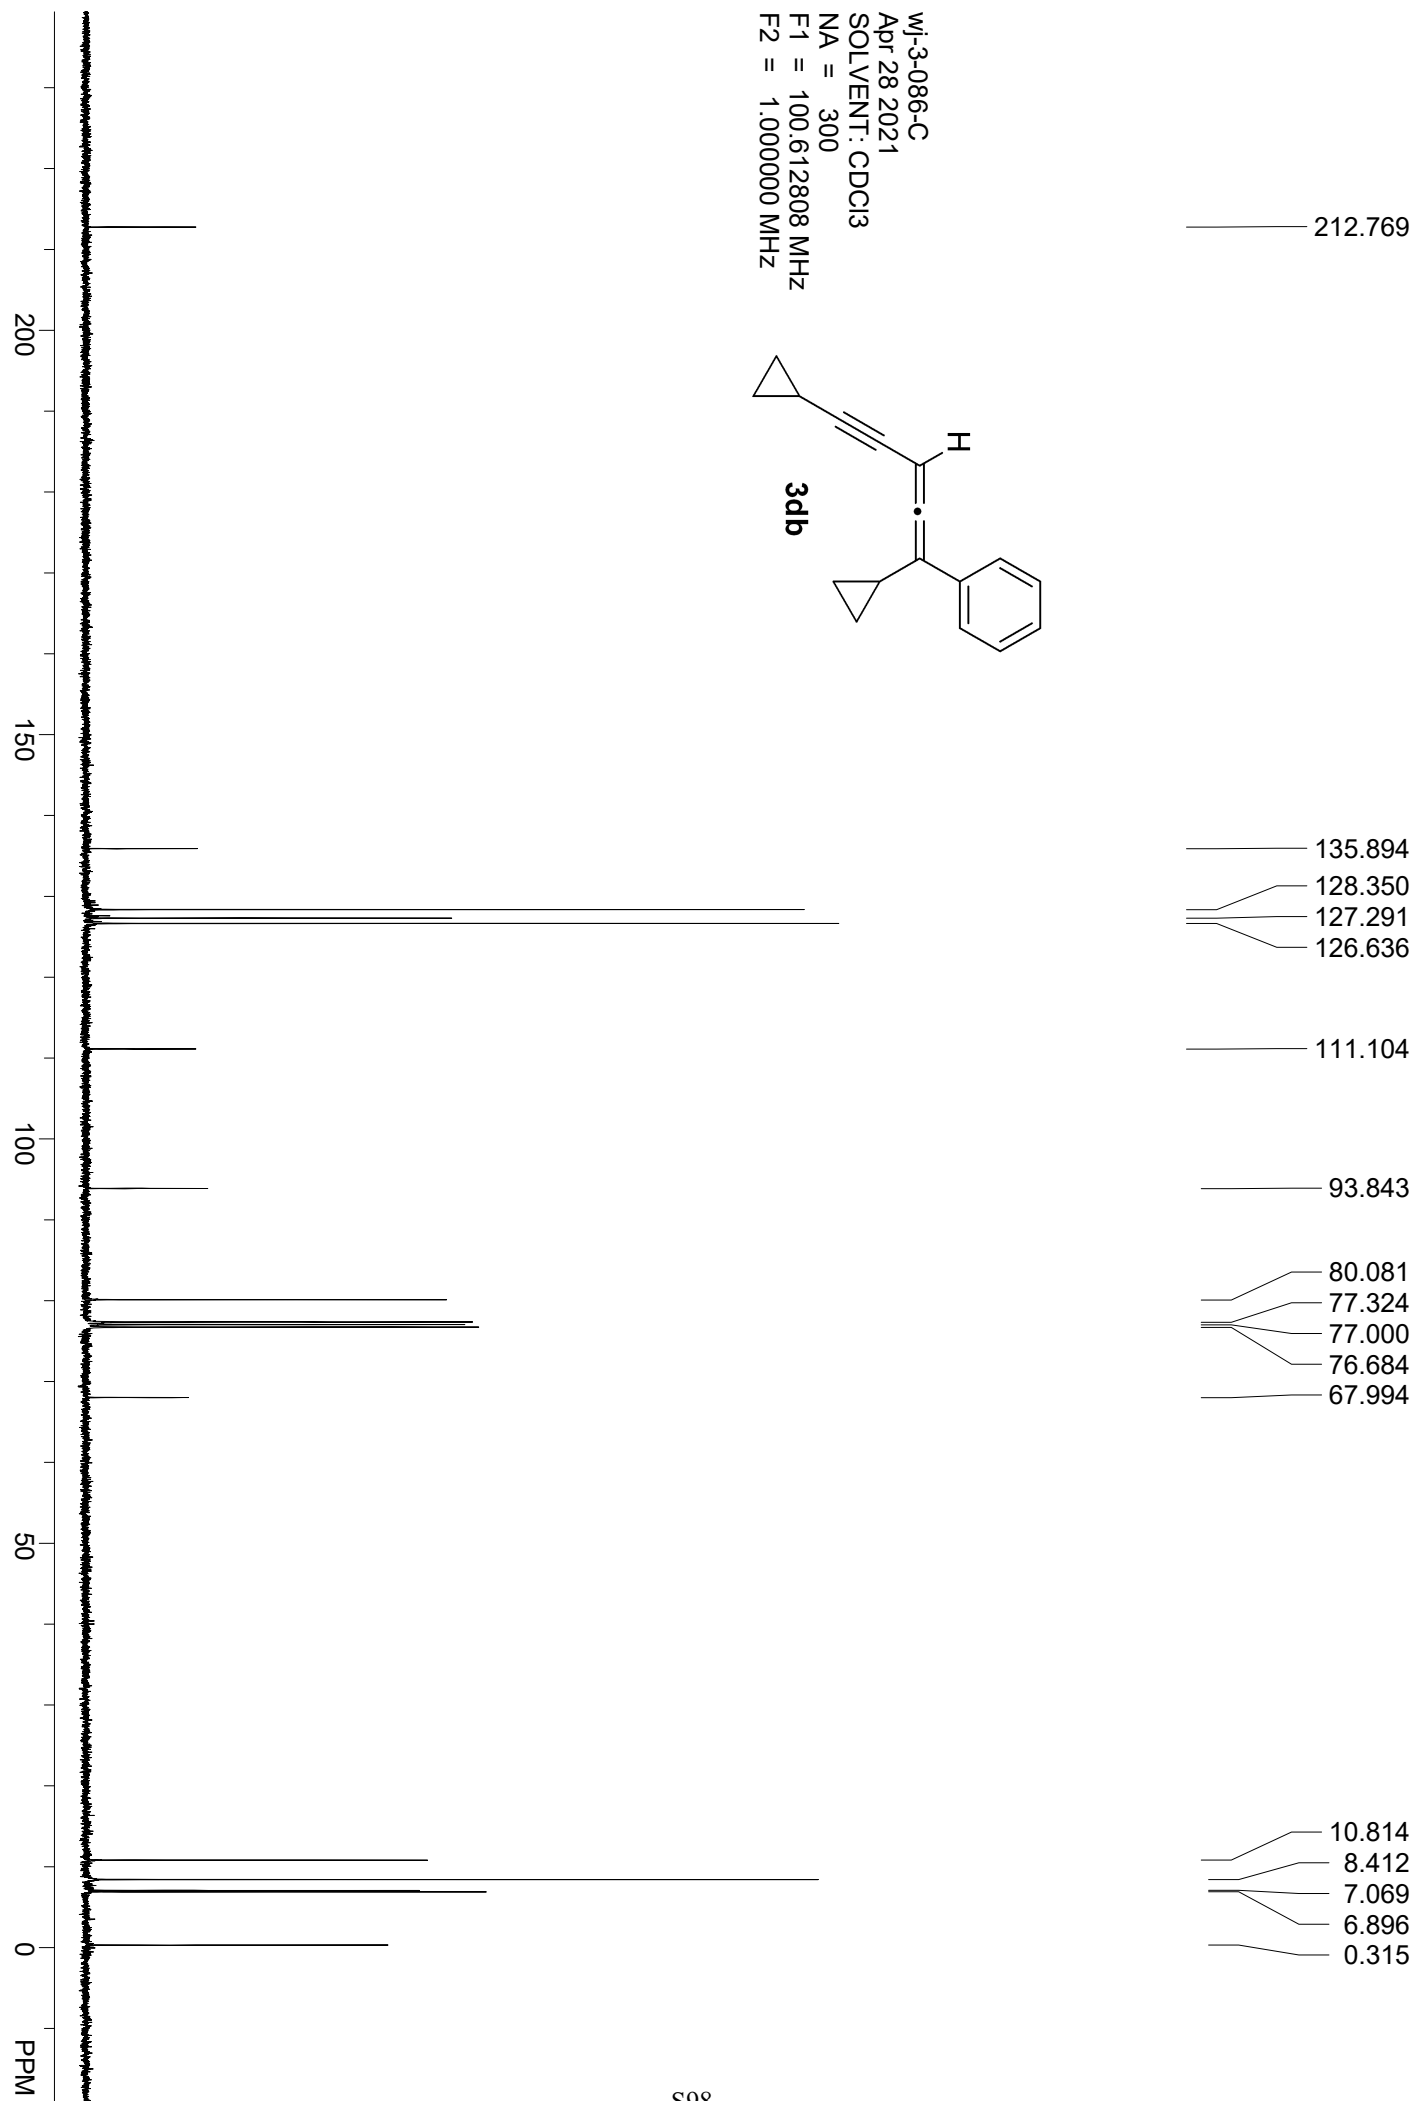

wj-3-086-purity  
Apr 28 2021  
SOLVENT: CDCl3  
NA = 4  
F1 = 400.130005 MHz  
F2 = 1.000000 MHz

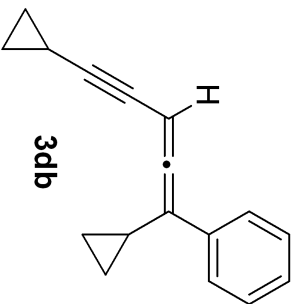

purity: CH<sub>2</sub>Br<sub>2</sub> (14.0 μL, 0.2 mmol) as  
internal standard in 30.0 mg product

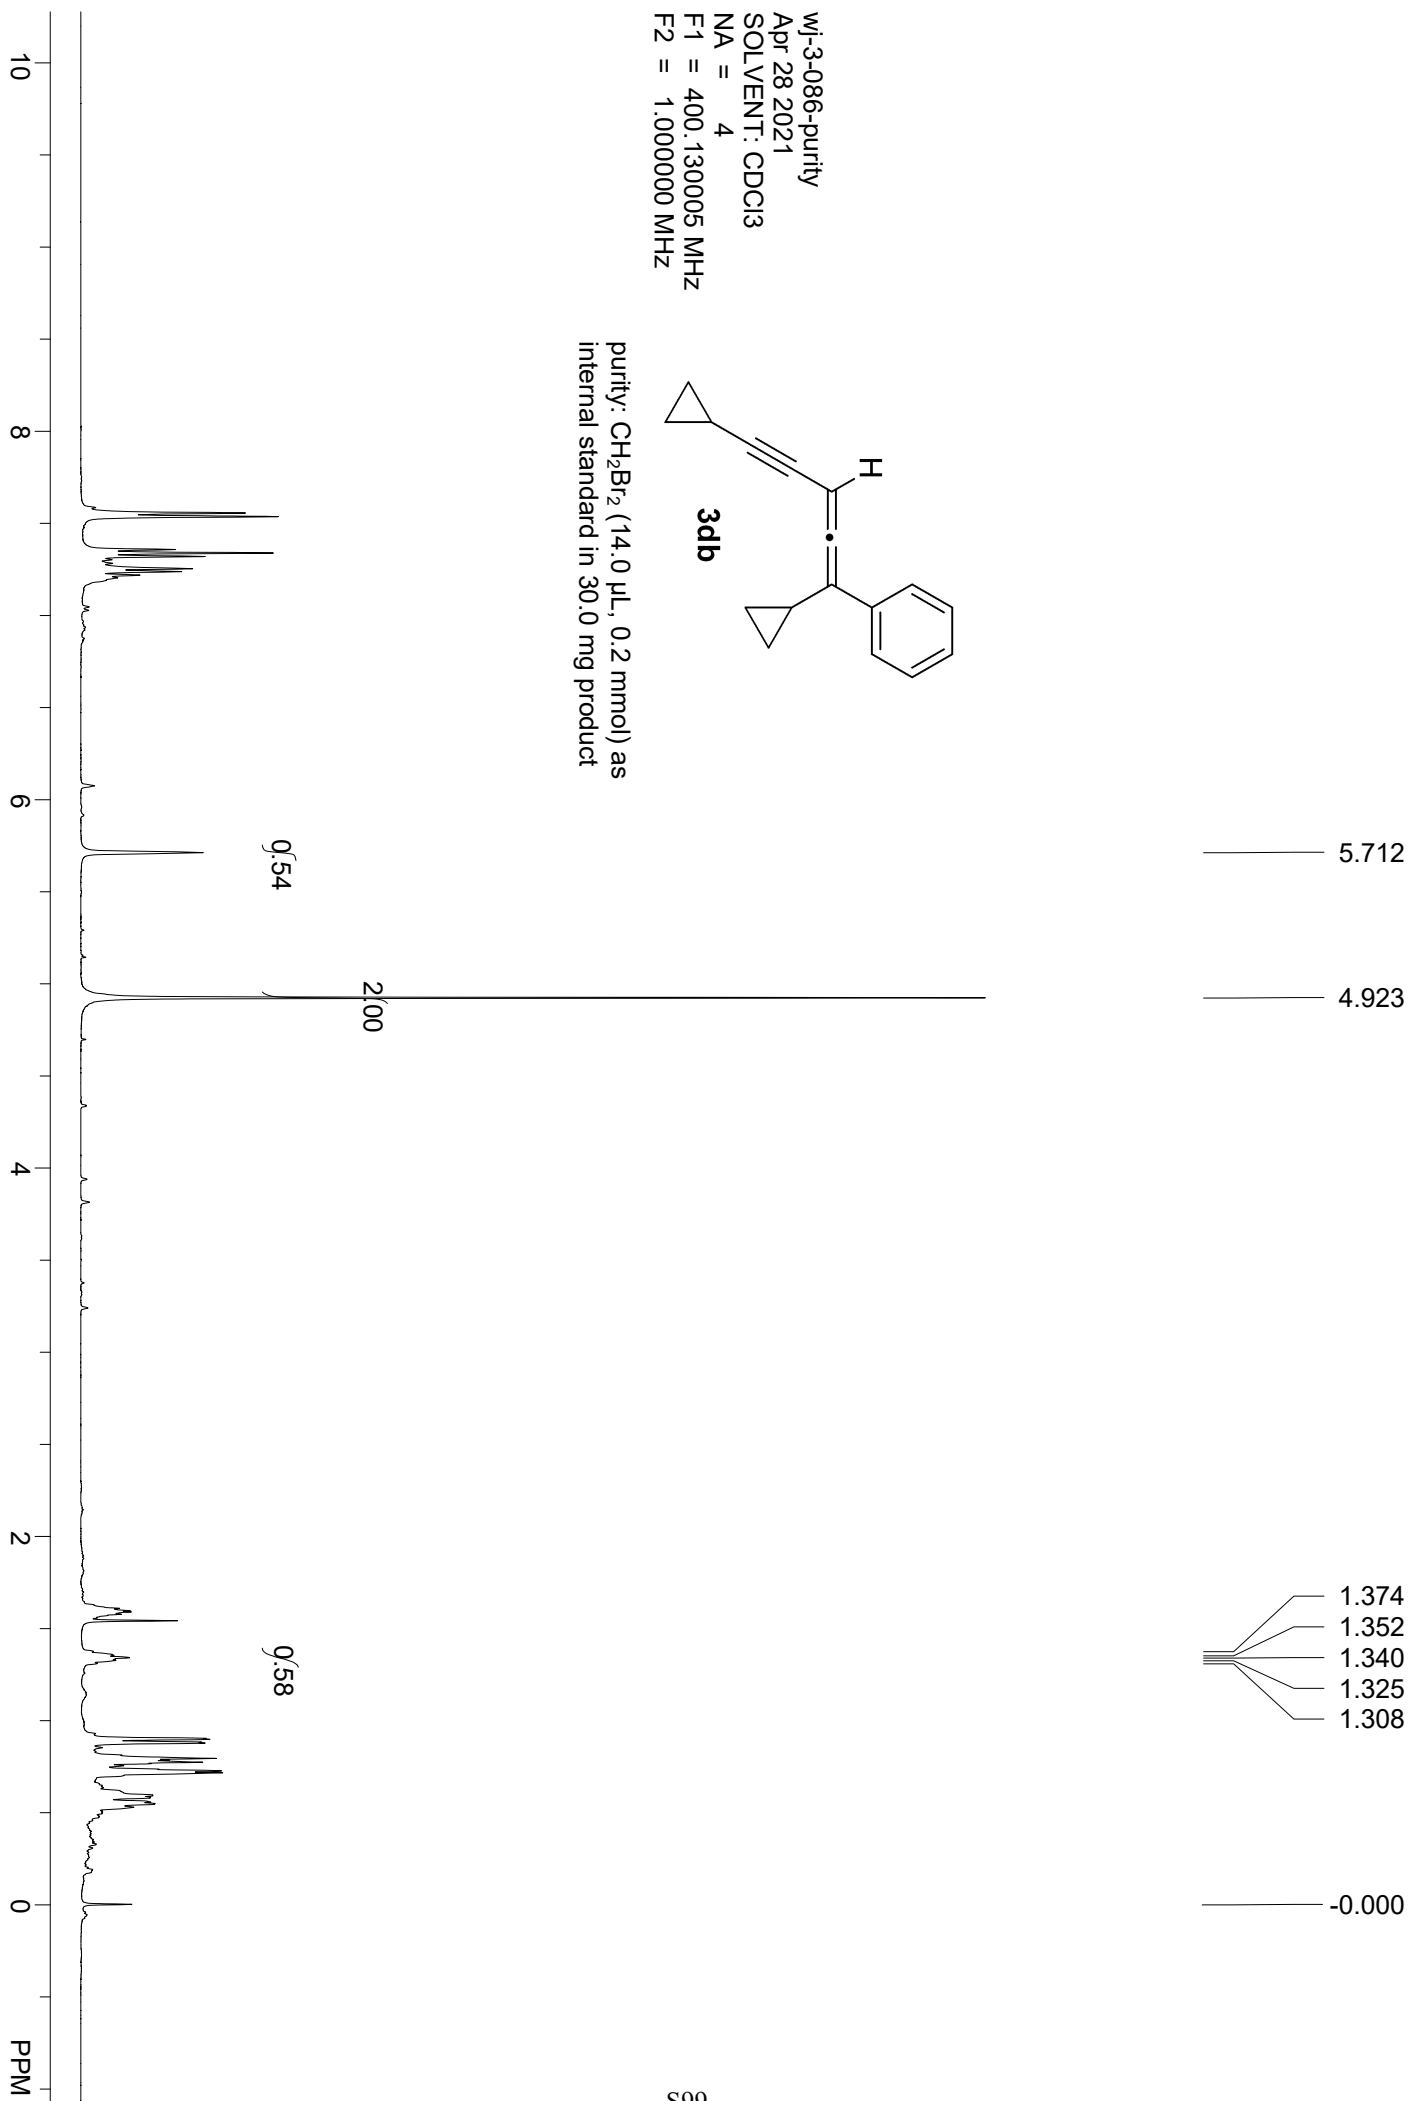

wj-3-083-H  
Apr 27 2021  
SOLVENT: CDCl3  
NA = 4  
F1 = 400.130005 MHz  
F2 = 1.000000 MHz

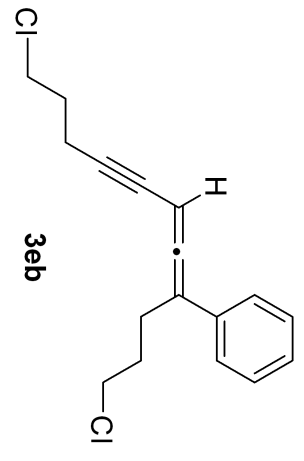

- 7.401
- 7.382
- 7.364
- 7.346
- 7.326
- 7.267
- 7.254
- 7.232

5.755

- 3.669
- 3.663
- 3.654
- 3.647
- 3.638
- 3.631
- 2.677
- 2.668
- 2.659
- 2.650
- 2.640
- 2.632
- 2.623
- 2.529
- 2.525
- 2.512
- 2.508
- 2.495
- 2.086
- 2.069
- 2.052
- 2.035
- 2.019
- 2.003
- 1.987
- 1.970
- 1.954
- 0.000

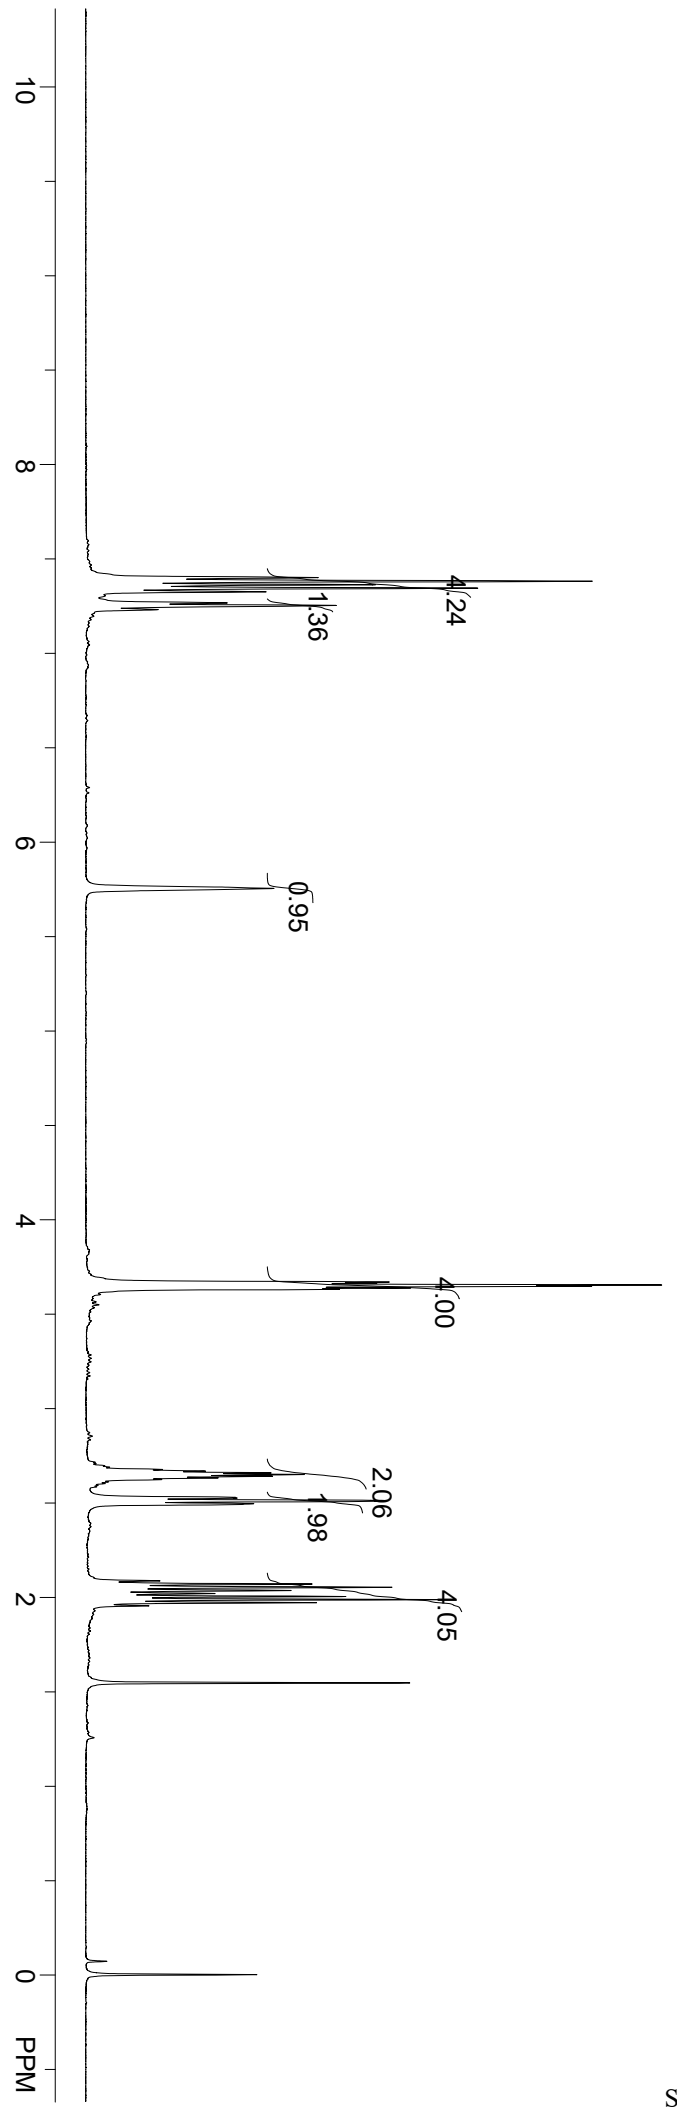



wj-3-083-C  
Apr 27 2021  
SOLVENT: CDCl3  
NA = 250  
F1 = 100.612770 MHz  
F2 = 1.000000 MHz

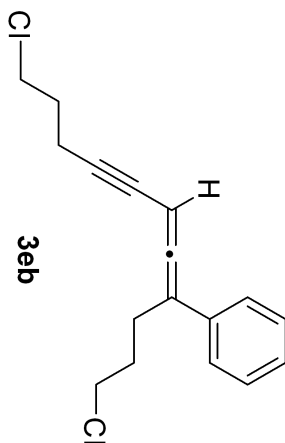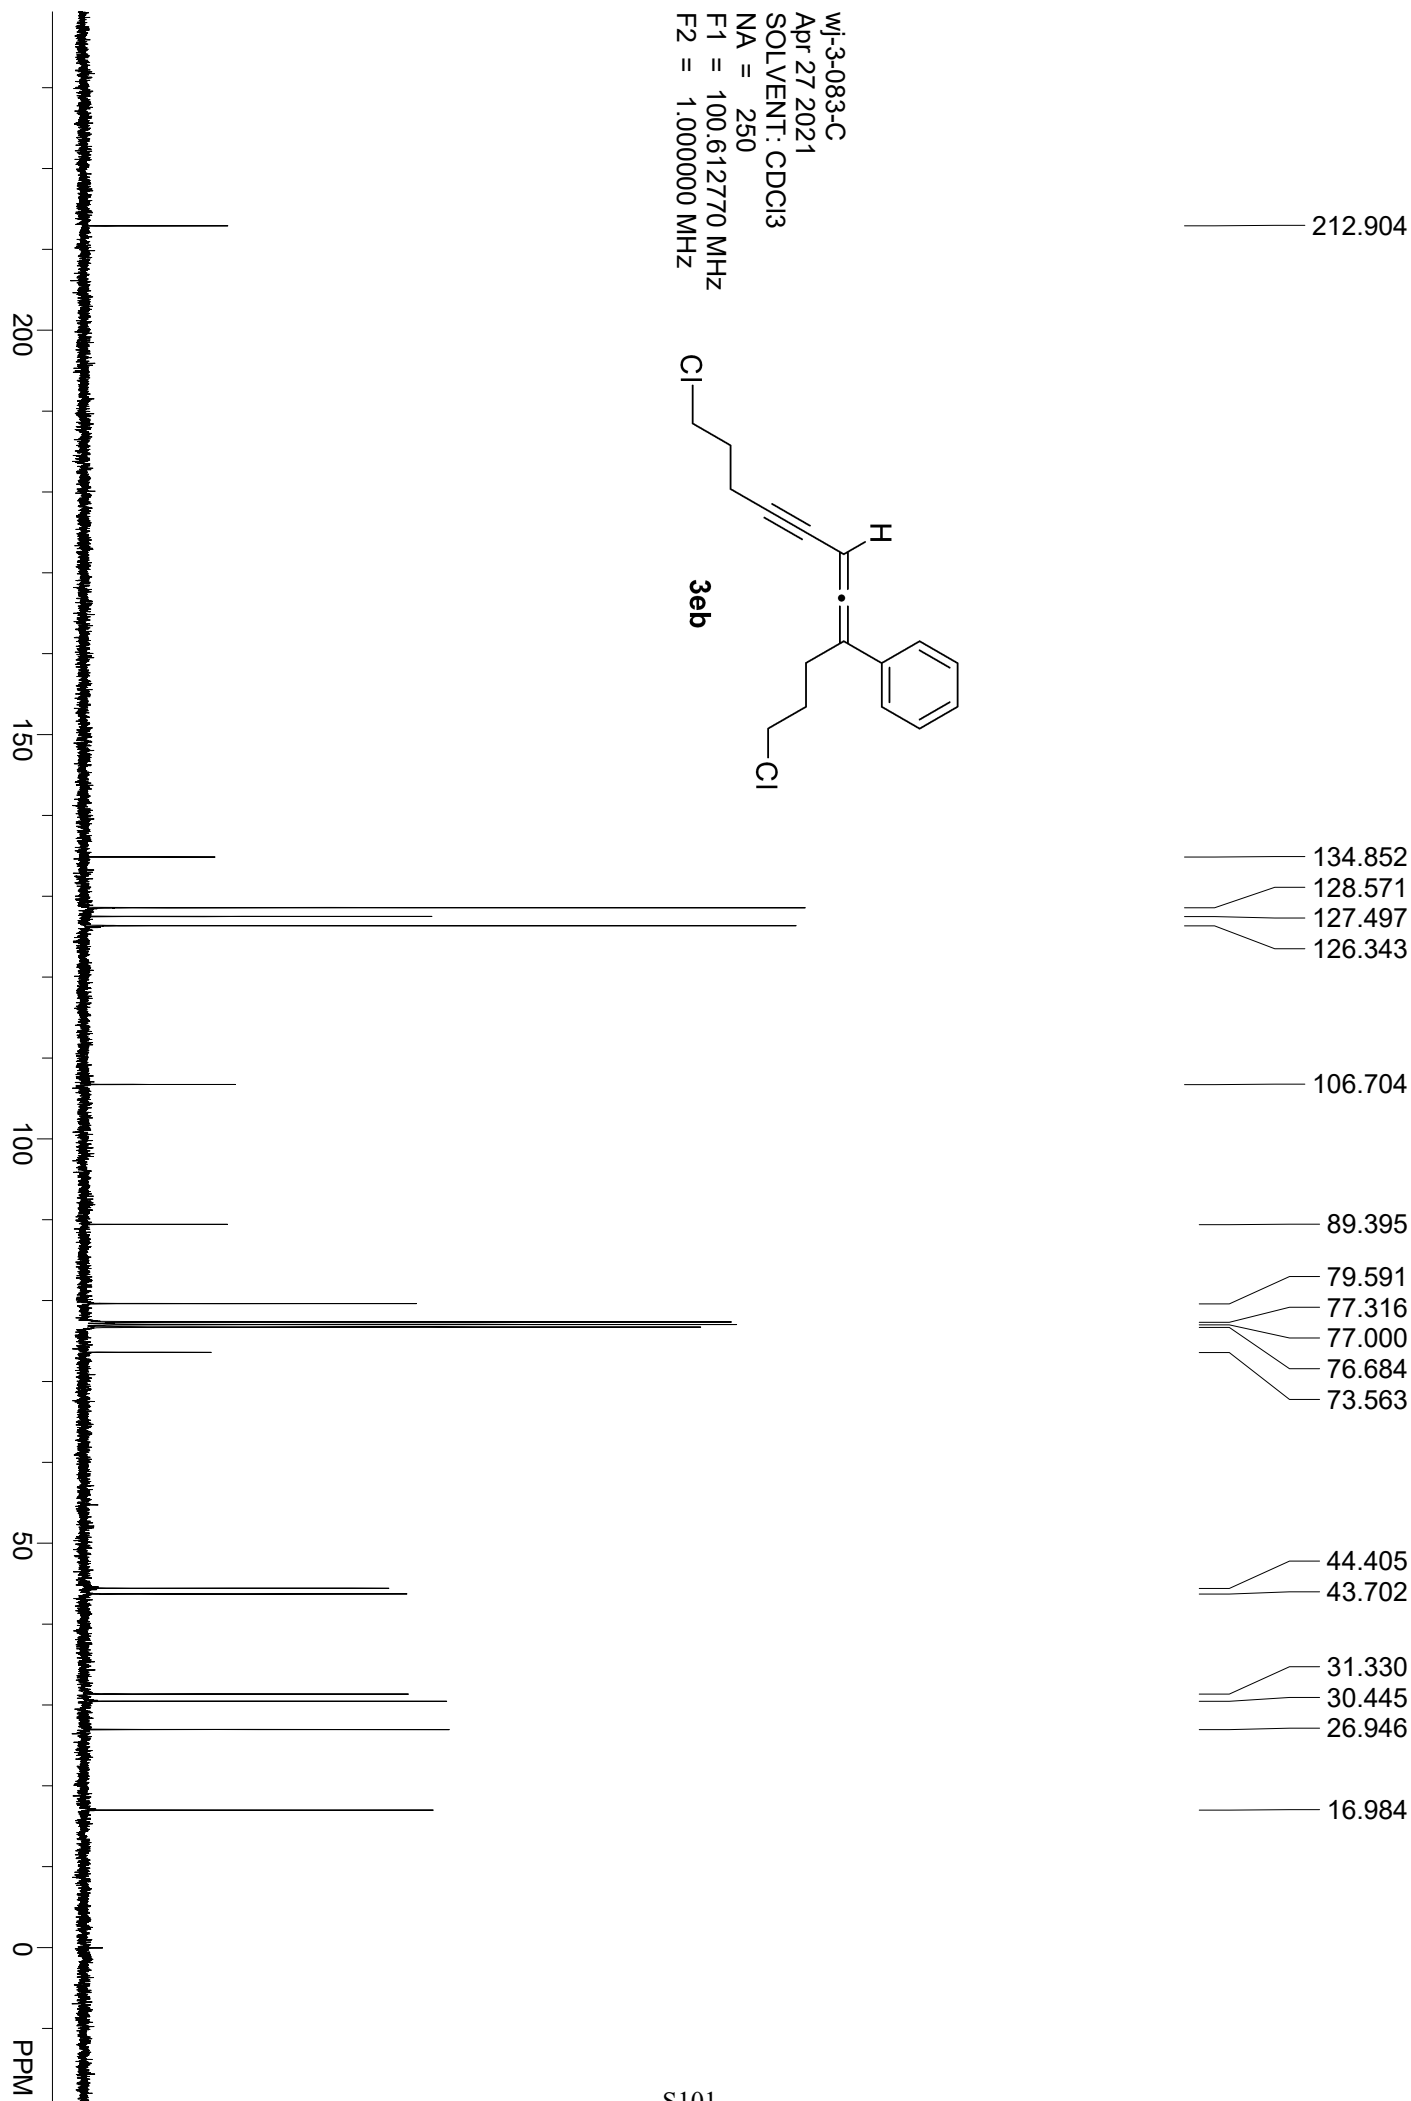

wf-3-106-H  
May 15 2021  
SOLVENT: CDCl3  
NA = 4  
F1 = 400.130005 MHz  
F2 = 1.000000 MHz

- 7.369
- 7.358
- 7.336
- 7.282
- 7.275
- 7.269
- 7.260

5.779

- 2.666
- 2.656
- 2.648
- 2.640
- 2.630
- 2.518
- 2.511
- 2.500
- 2.482
- 2.464
- 2.446
- 1.987
- 1.968
- 1.951
- 1.932
- 1.913
- 1.895
- 1.877
- 1.860
- 0.000

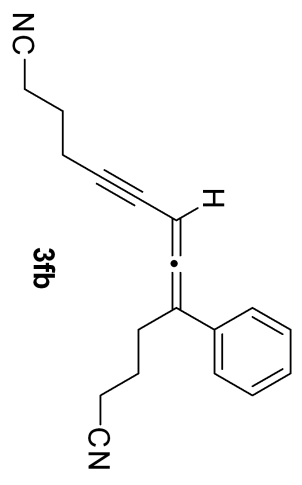

10  
8  
6  
4  
2  
0 PPM

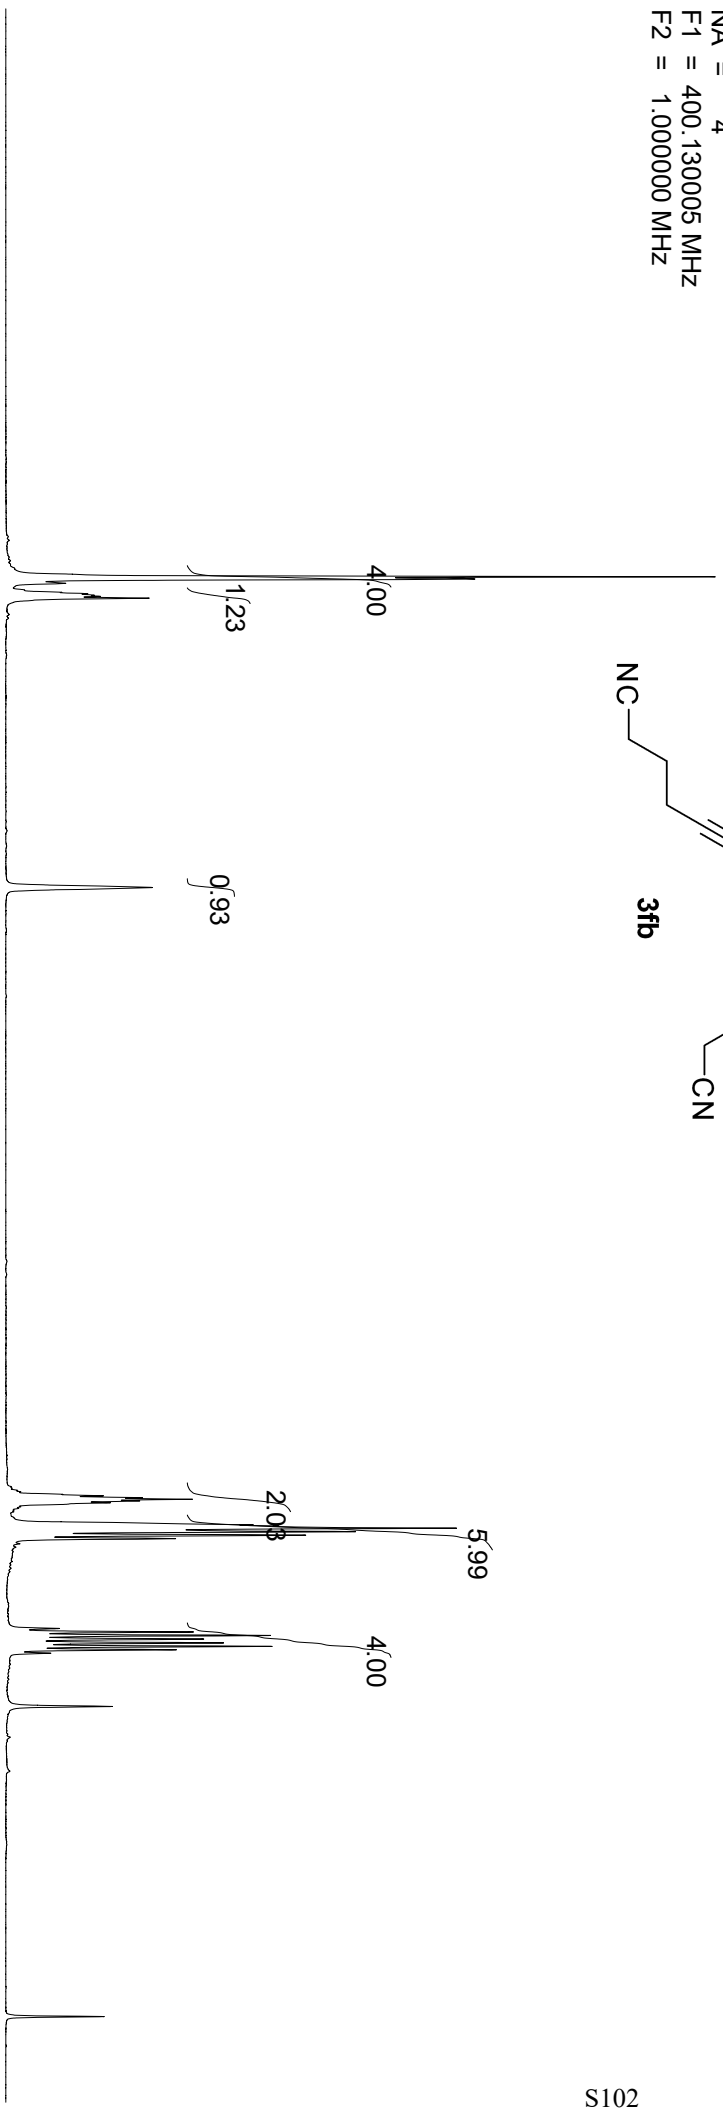

wj-3-106-C  
May 15 2021  
SOLVENT: CDCl3  
NA = 250  
F1 = 100.612770 MHz  
F2 = 1.000000 MHz

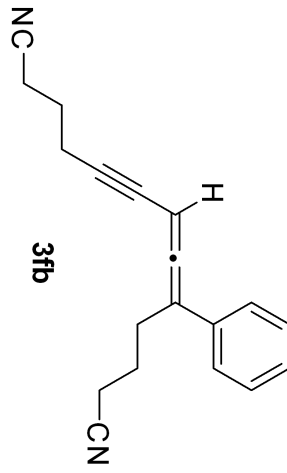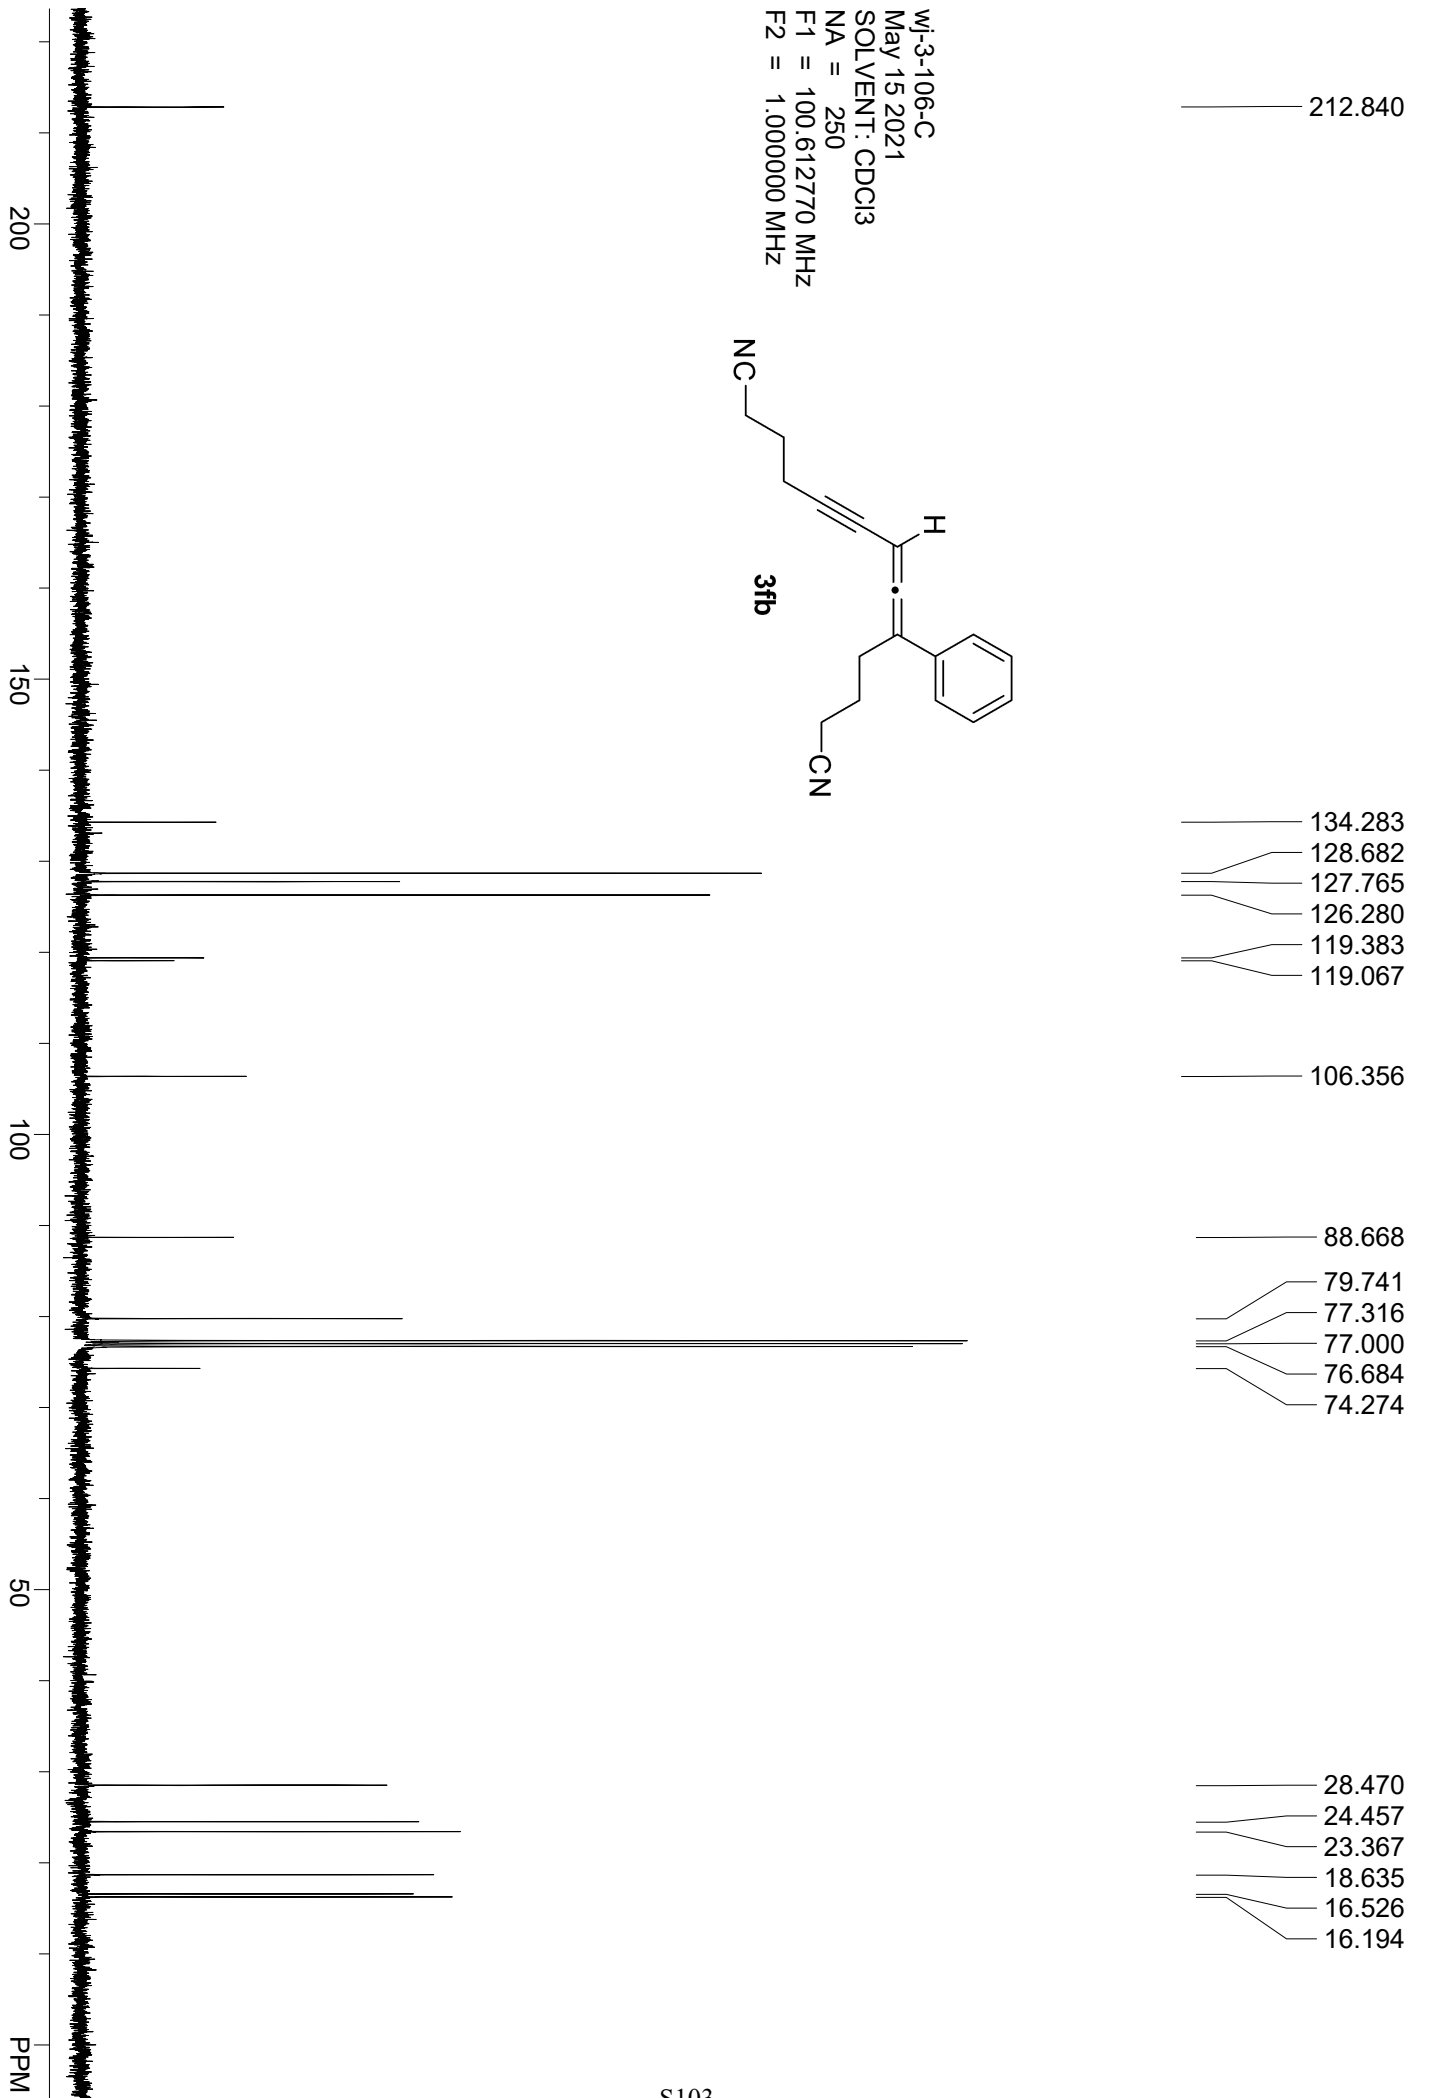

wf-3-084-H  
Apr 27 2021  
SOLVENT: CDCl3  
NA = 4  
F1 = 400.130035 MHz  
F2 = 1.000000 MHz

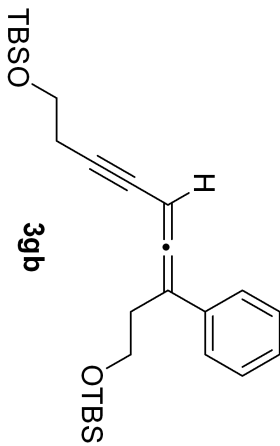

7.396  
7.377  
7.340  
7.322  
7.303  
7.253  
7.242  
7.224  
7.206

5.704

3.823  
3.805  
3.787  
3.757  
3.740  
3.722

2.723  
2.712  
2.705  
2.697  
2.687  
2.539  
2.535  
2.521  
2.517  
2.503

0.890

0.068  
0.042  
-0.000

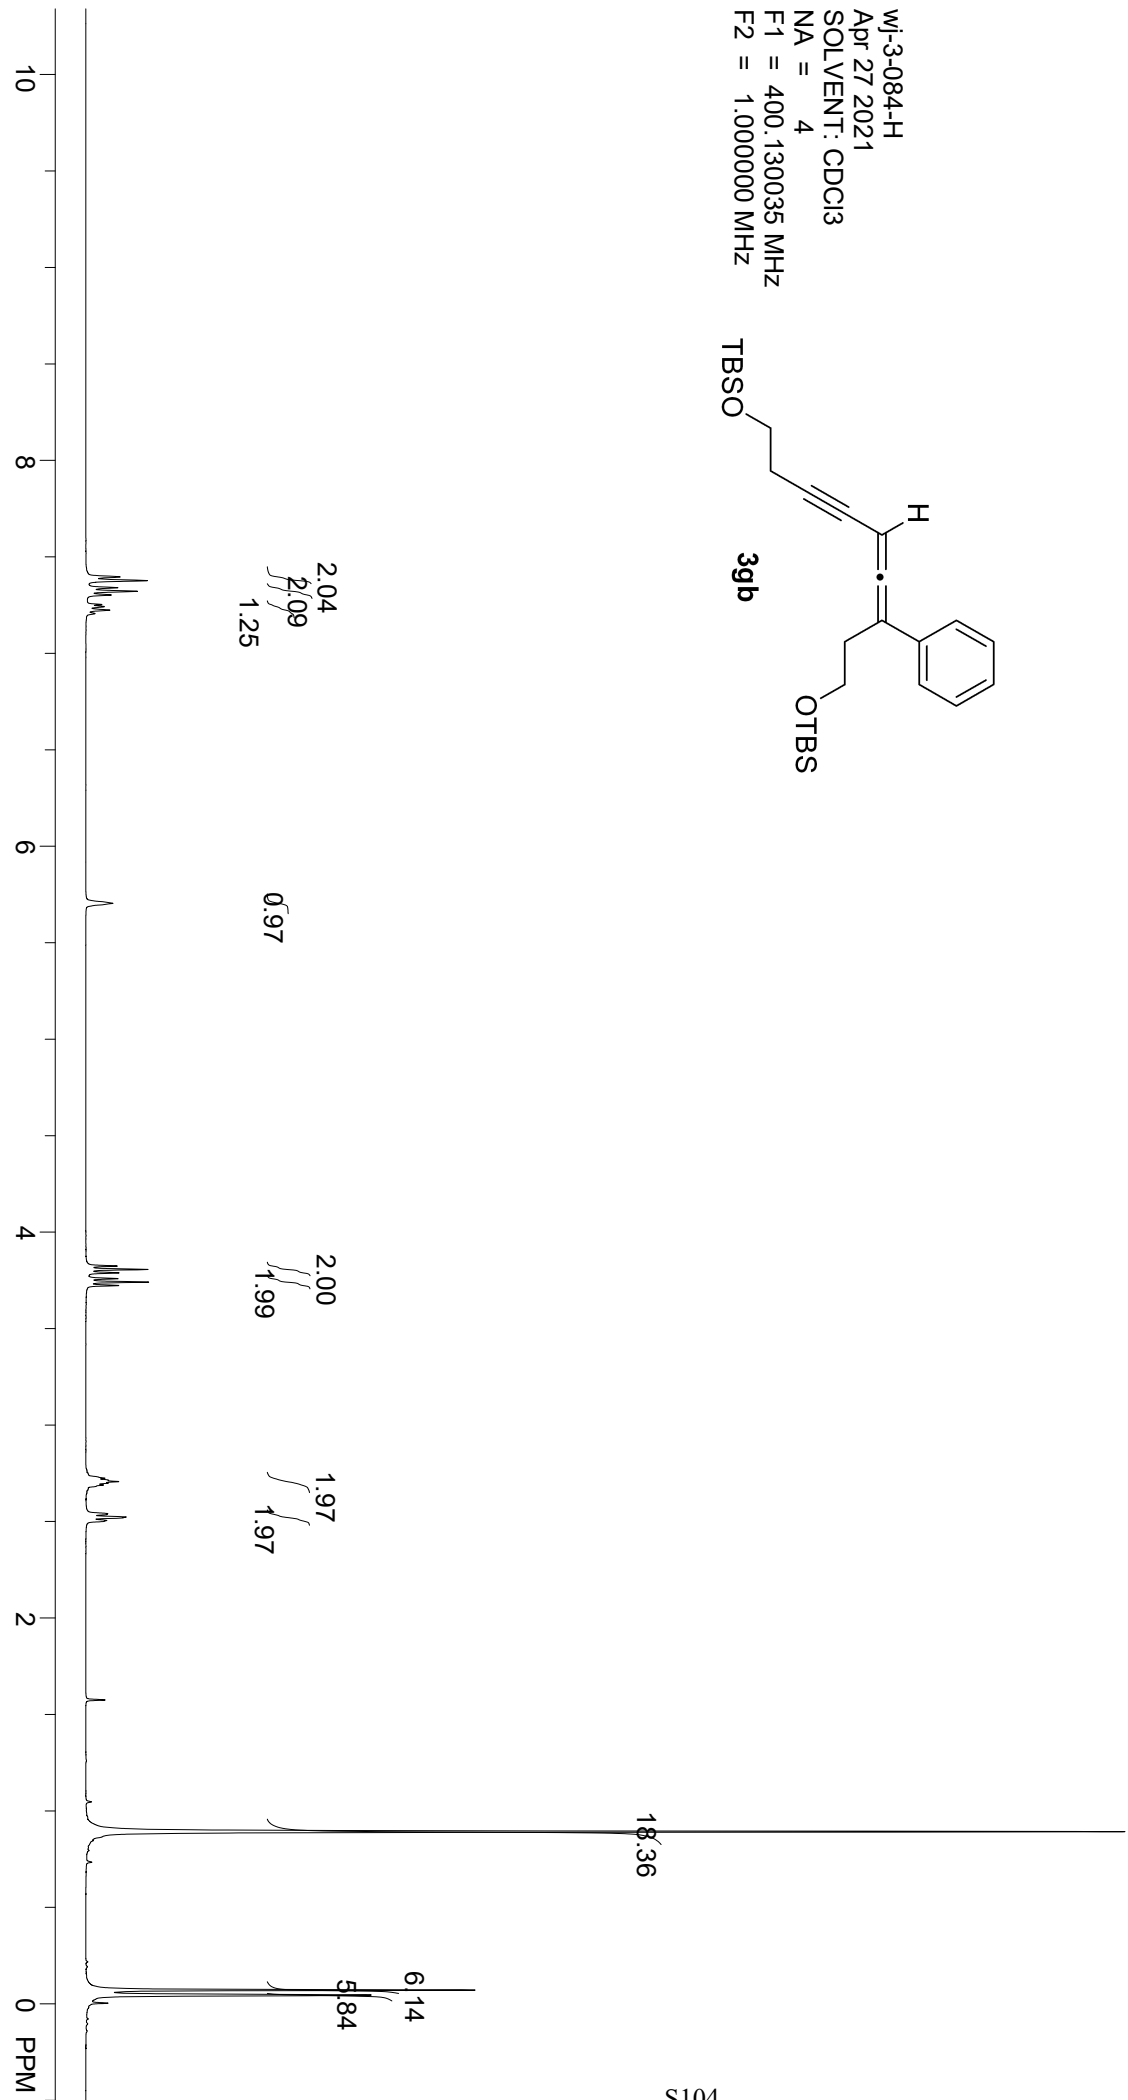

WJ-3-084-C  
Apr 27 2021  
SOLVENT: CDCl3  
NA = 250  
F1 = 100.612770 MHz  
F2 = 1.000000 MHz

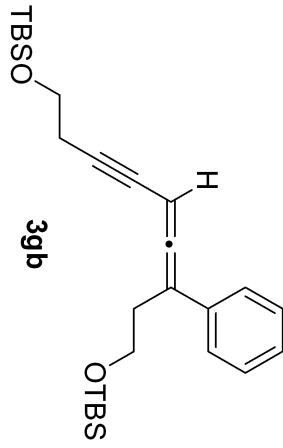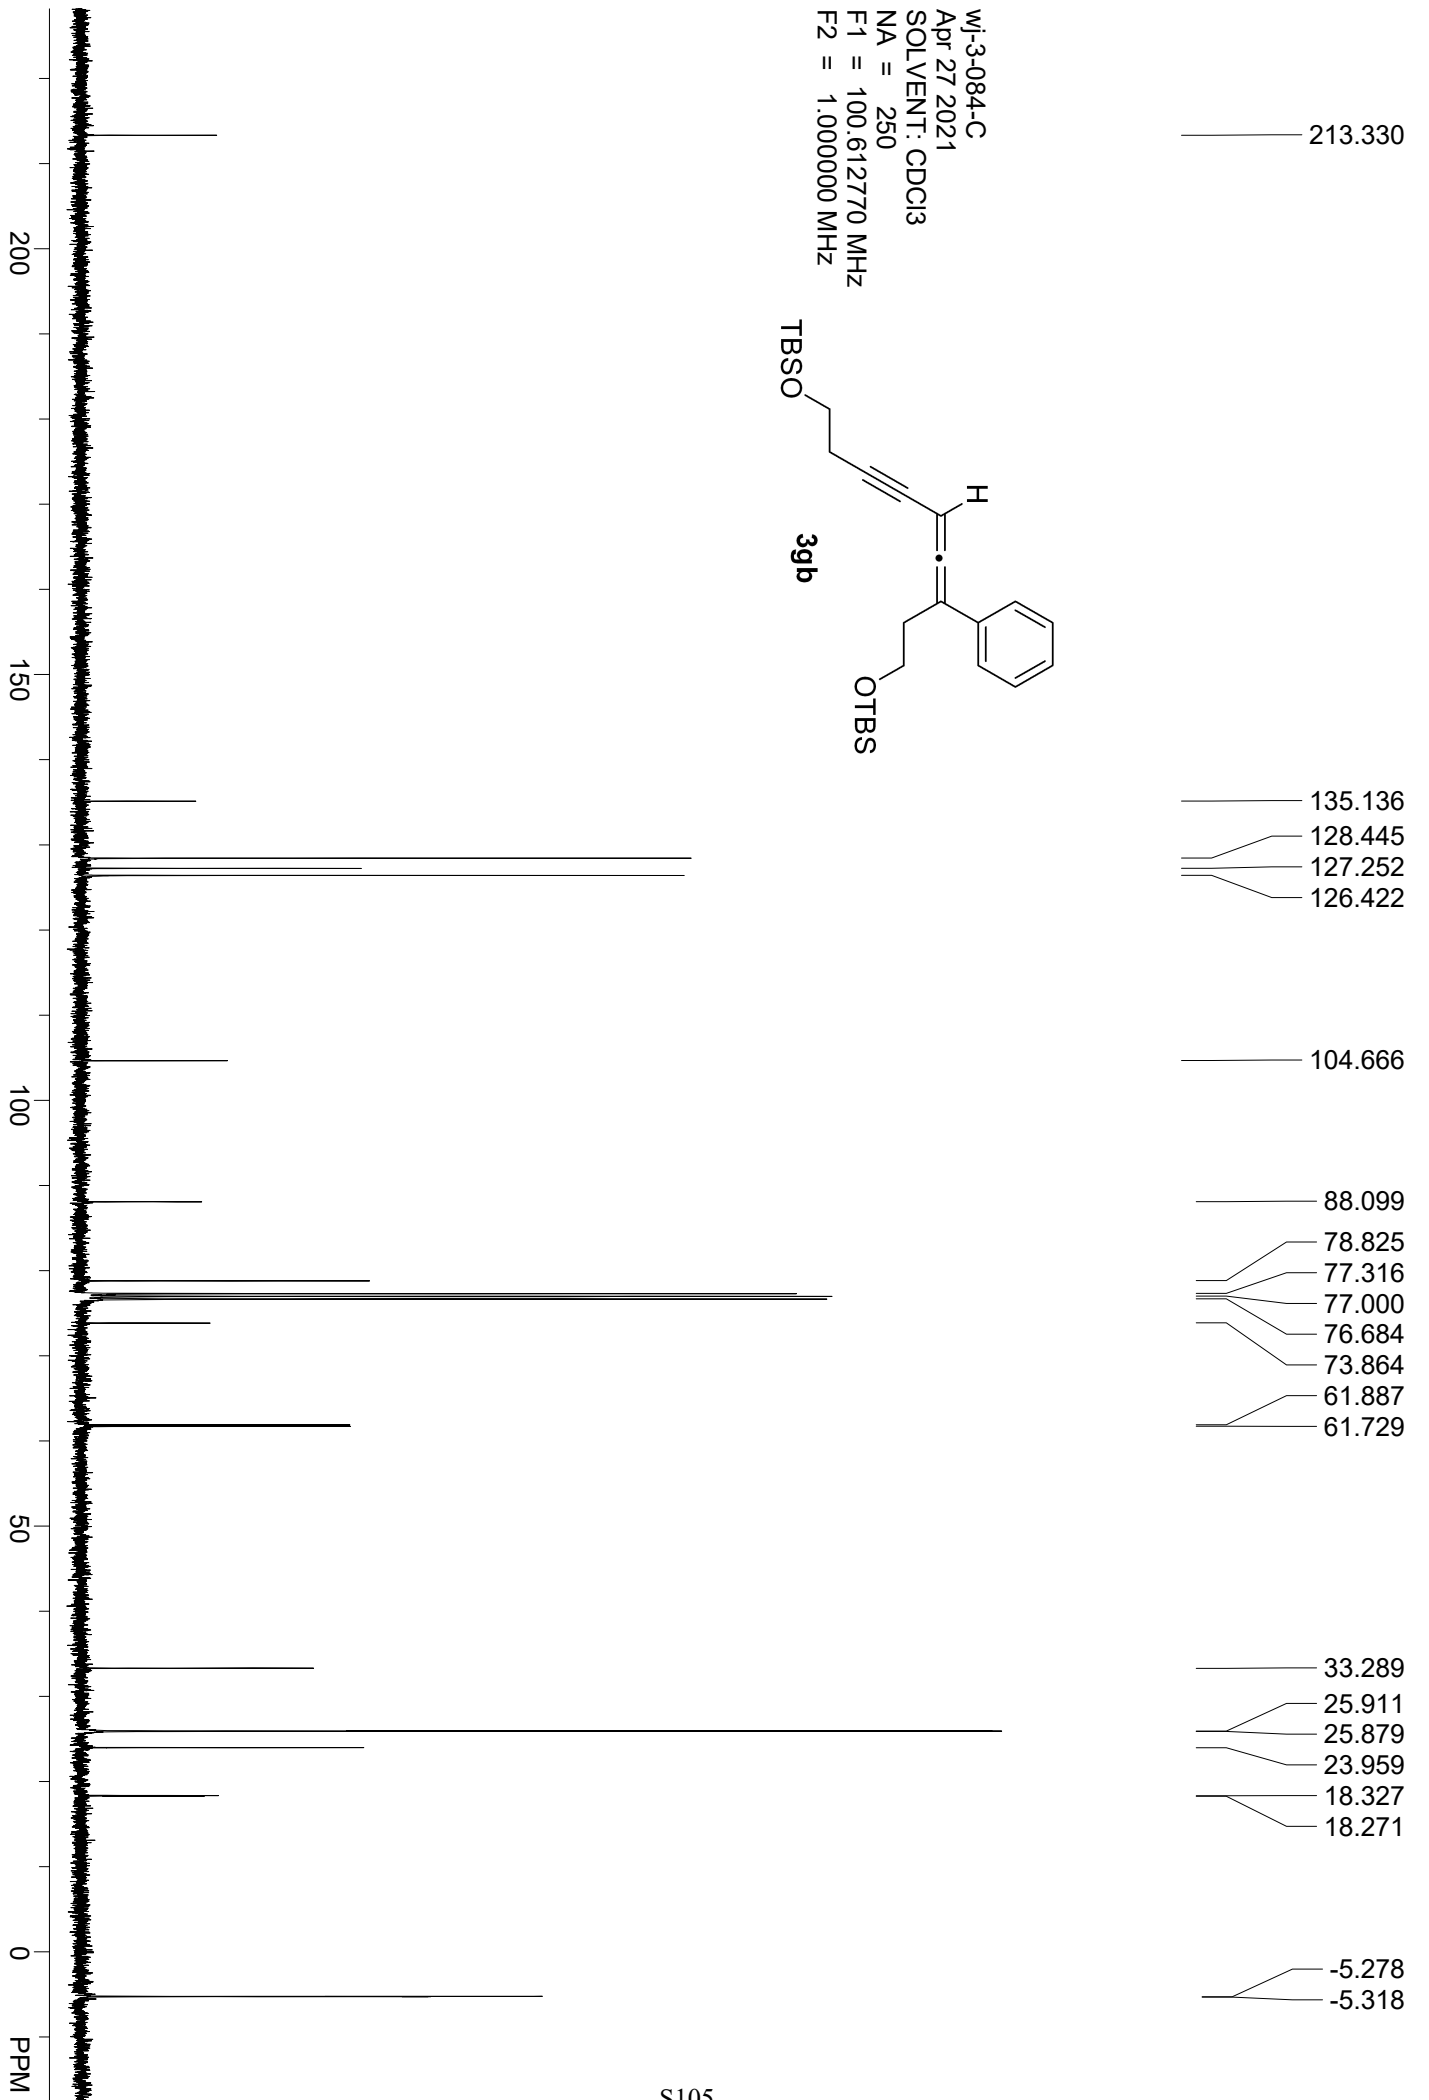

WJ-3-056-H  
Apr 05 2021  
SOLVENT: CDCl3  
NA = 4  
F1 = 400.130035 MHz  
F2 = 1.000000 MHz

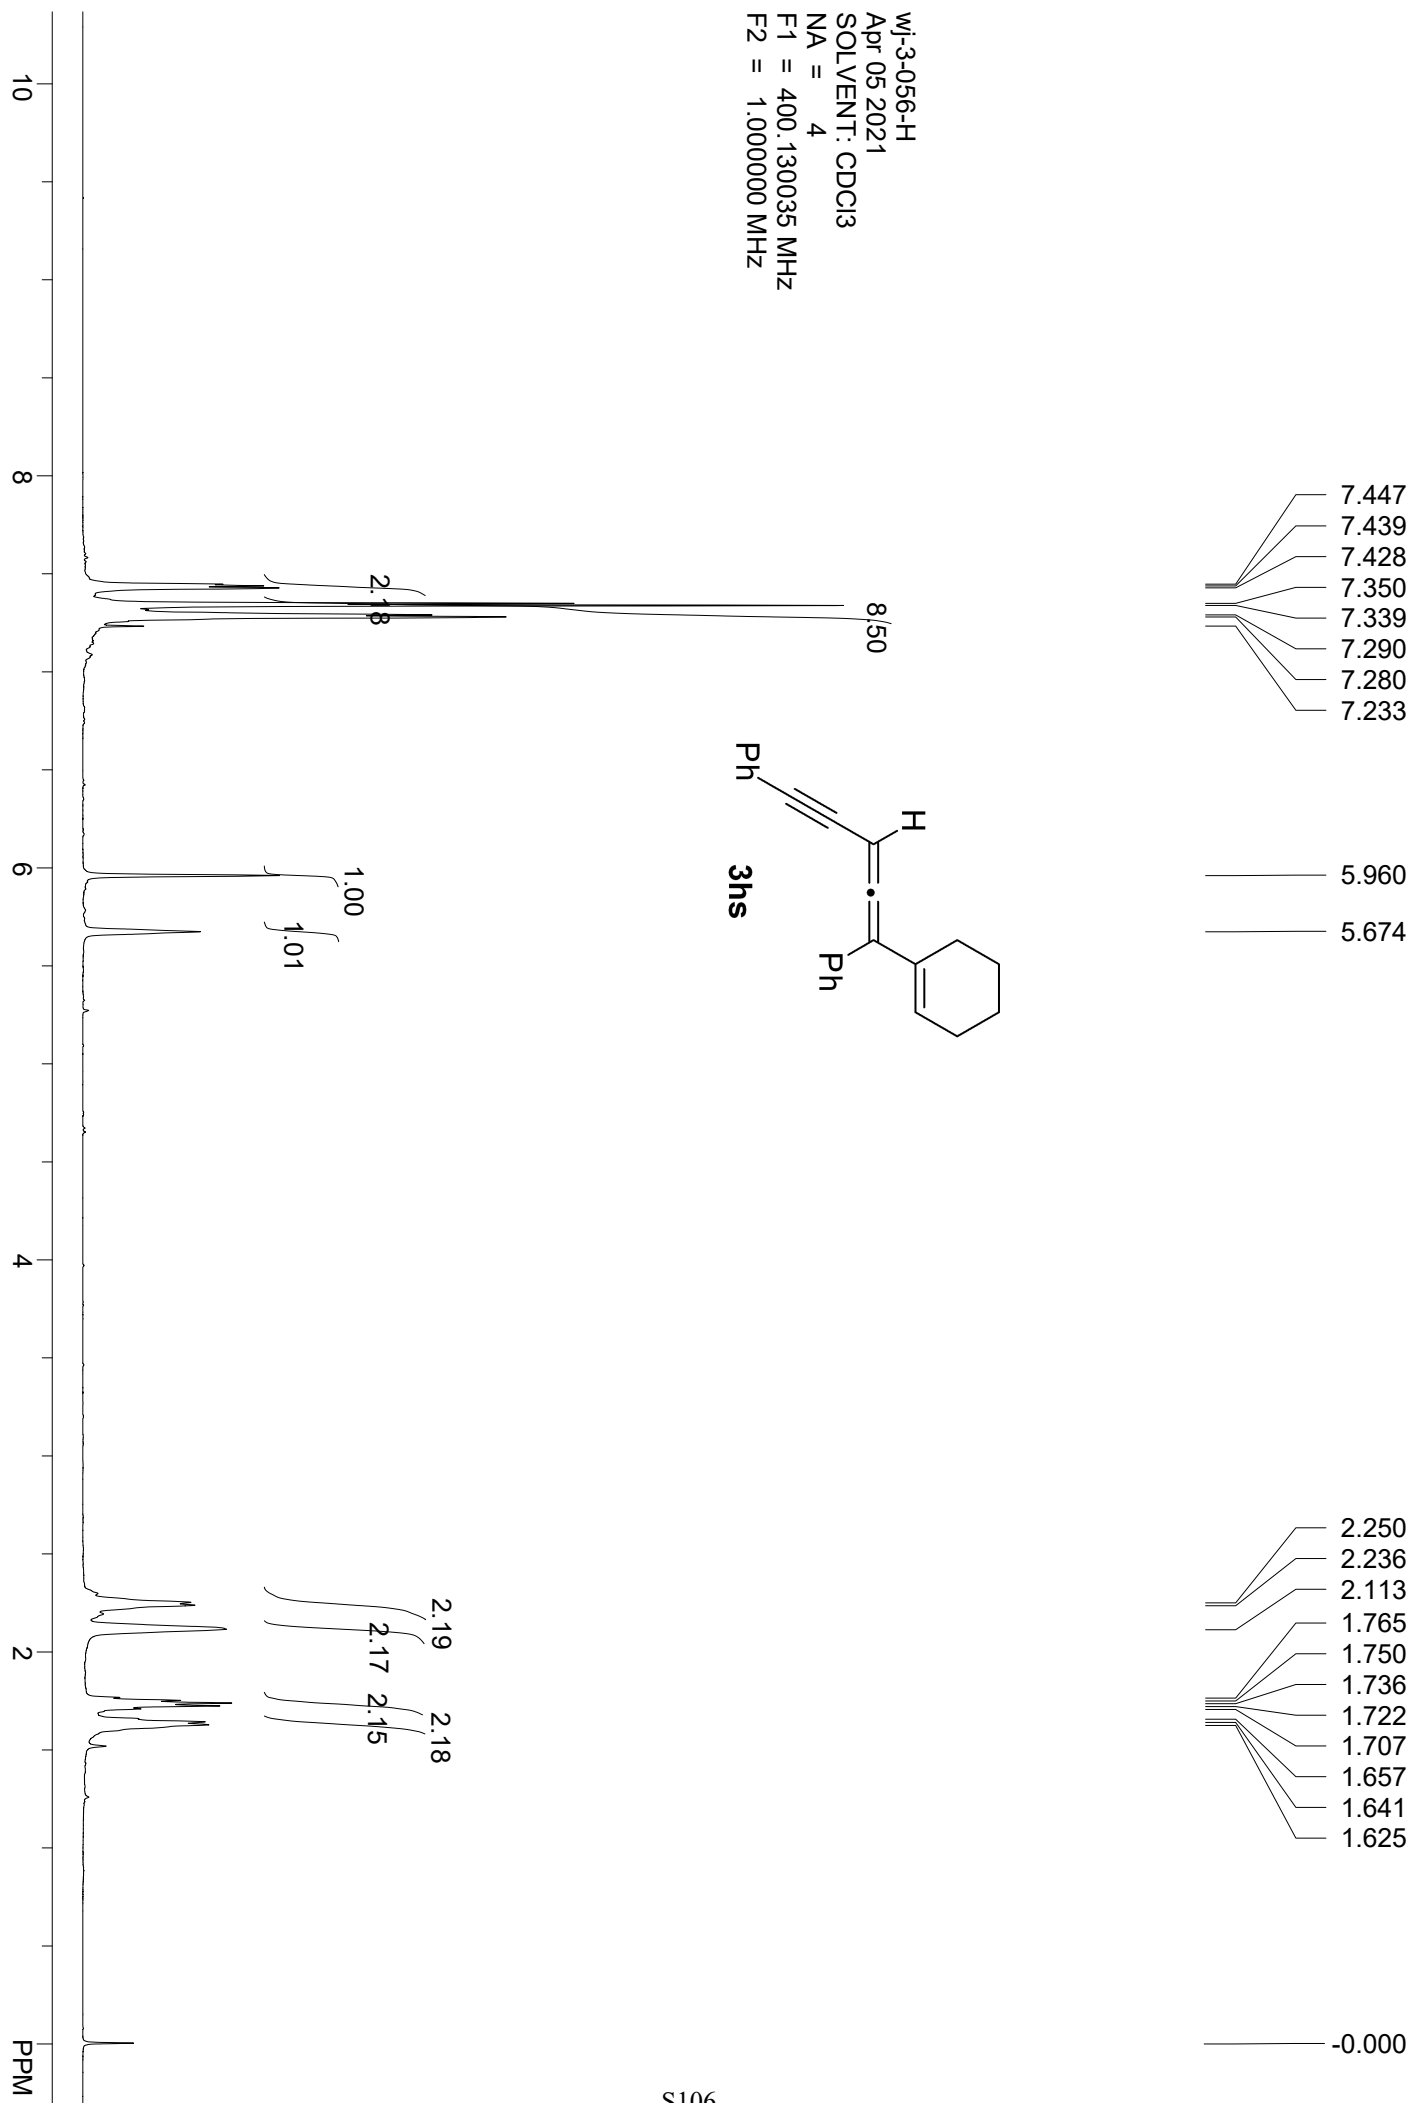

214.183

131.889  
135.286  
131.478  
129.251  
128.674  
128.255  
128.224  
128.042  
127.457  
123.499  
113.814

89.790  
82.459  
78.375  
77.324  
77.000  
76.684

27.546  
25.966  
22.798  
22.142

WJ-3-056-C  
Apr 05 2021  
SOLVENT: CDCl3  
NA = 300  
F1 = 100.612770 MHz  
F2 = 1.000000 MHz

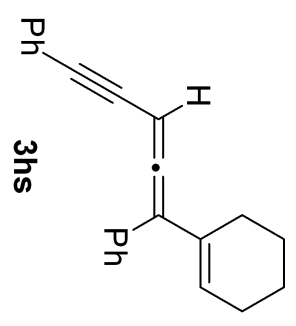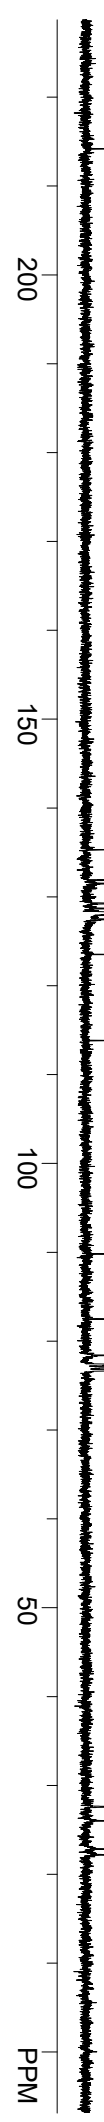

wj-5-054-H  
Dec 08 2021  
SOLVENT: CDCl3  
NA = 4  
F1 = 400.130005 MHz  
F2 = 1.000000 MHz

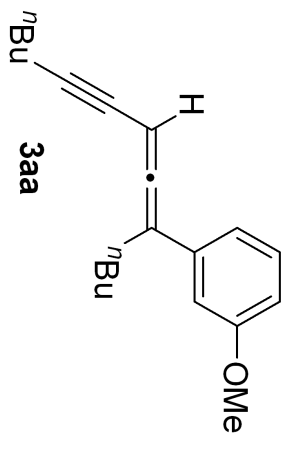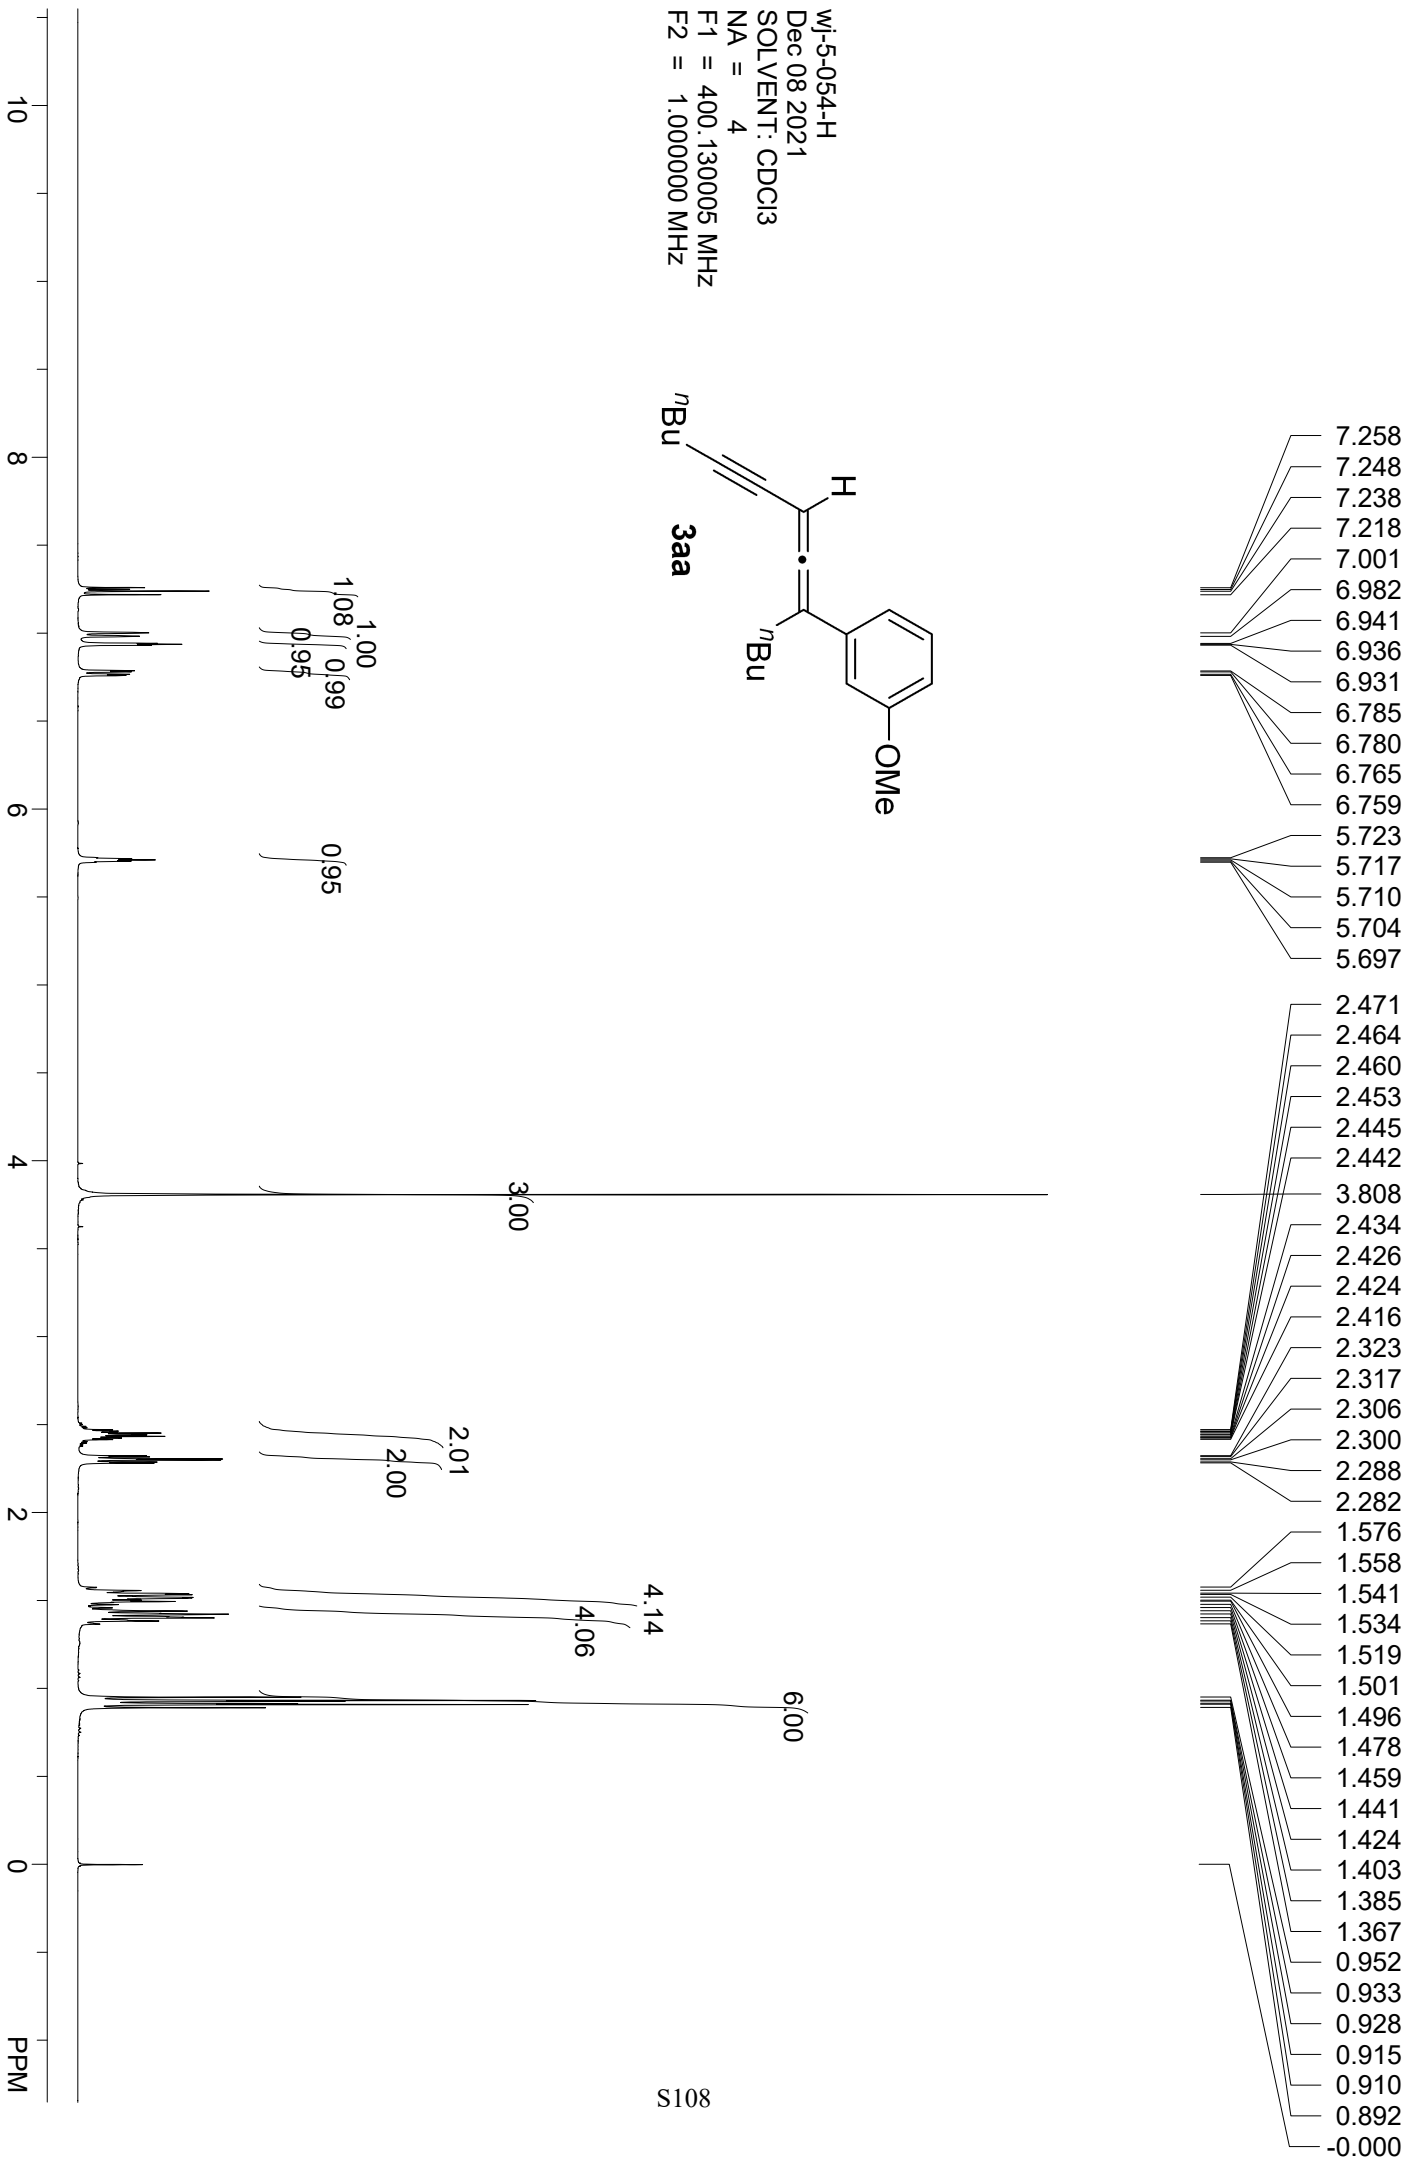



213.093

159.697

137.253

129.298

118.965

112.368

112.345

107.589

91.109

79.022

77.324

77.000

76.684

72.829

55.196

30.801

29.790

29.671

22.372

21.969

19.267

13.903

13.587

WJ-5-054-C  
Dec 08 2021  
SOLVENT: CDCl3  
NA = 300  
F1 = 100.612770 MHz  
F2 = 1.000000 MHz

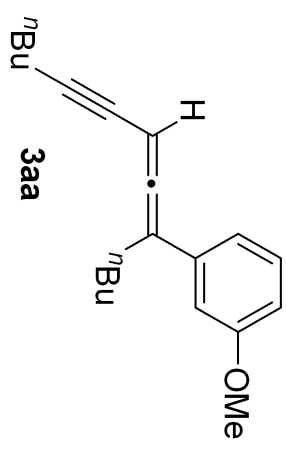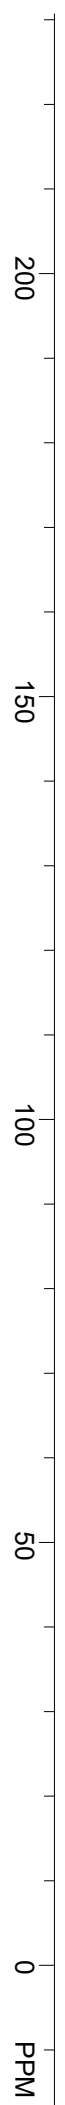

wj-5-059-H  
Dec 09 2021  
SOLVENT: CDCl3  
NA = 4  
F1 = 400.130005 MHz  
F2 = 1.000000 MHz

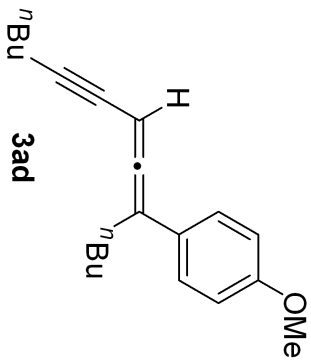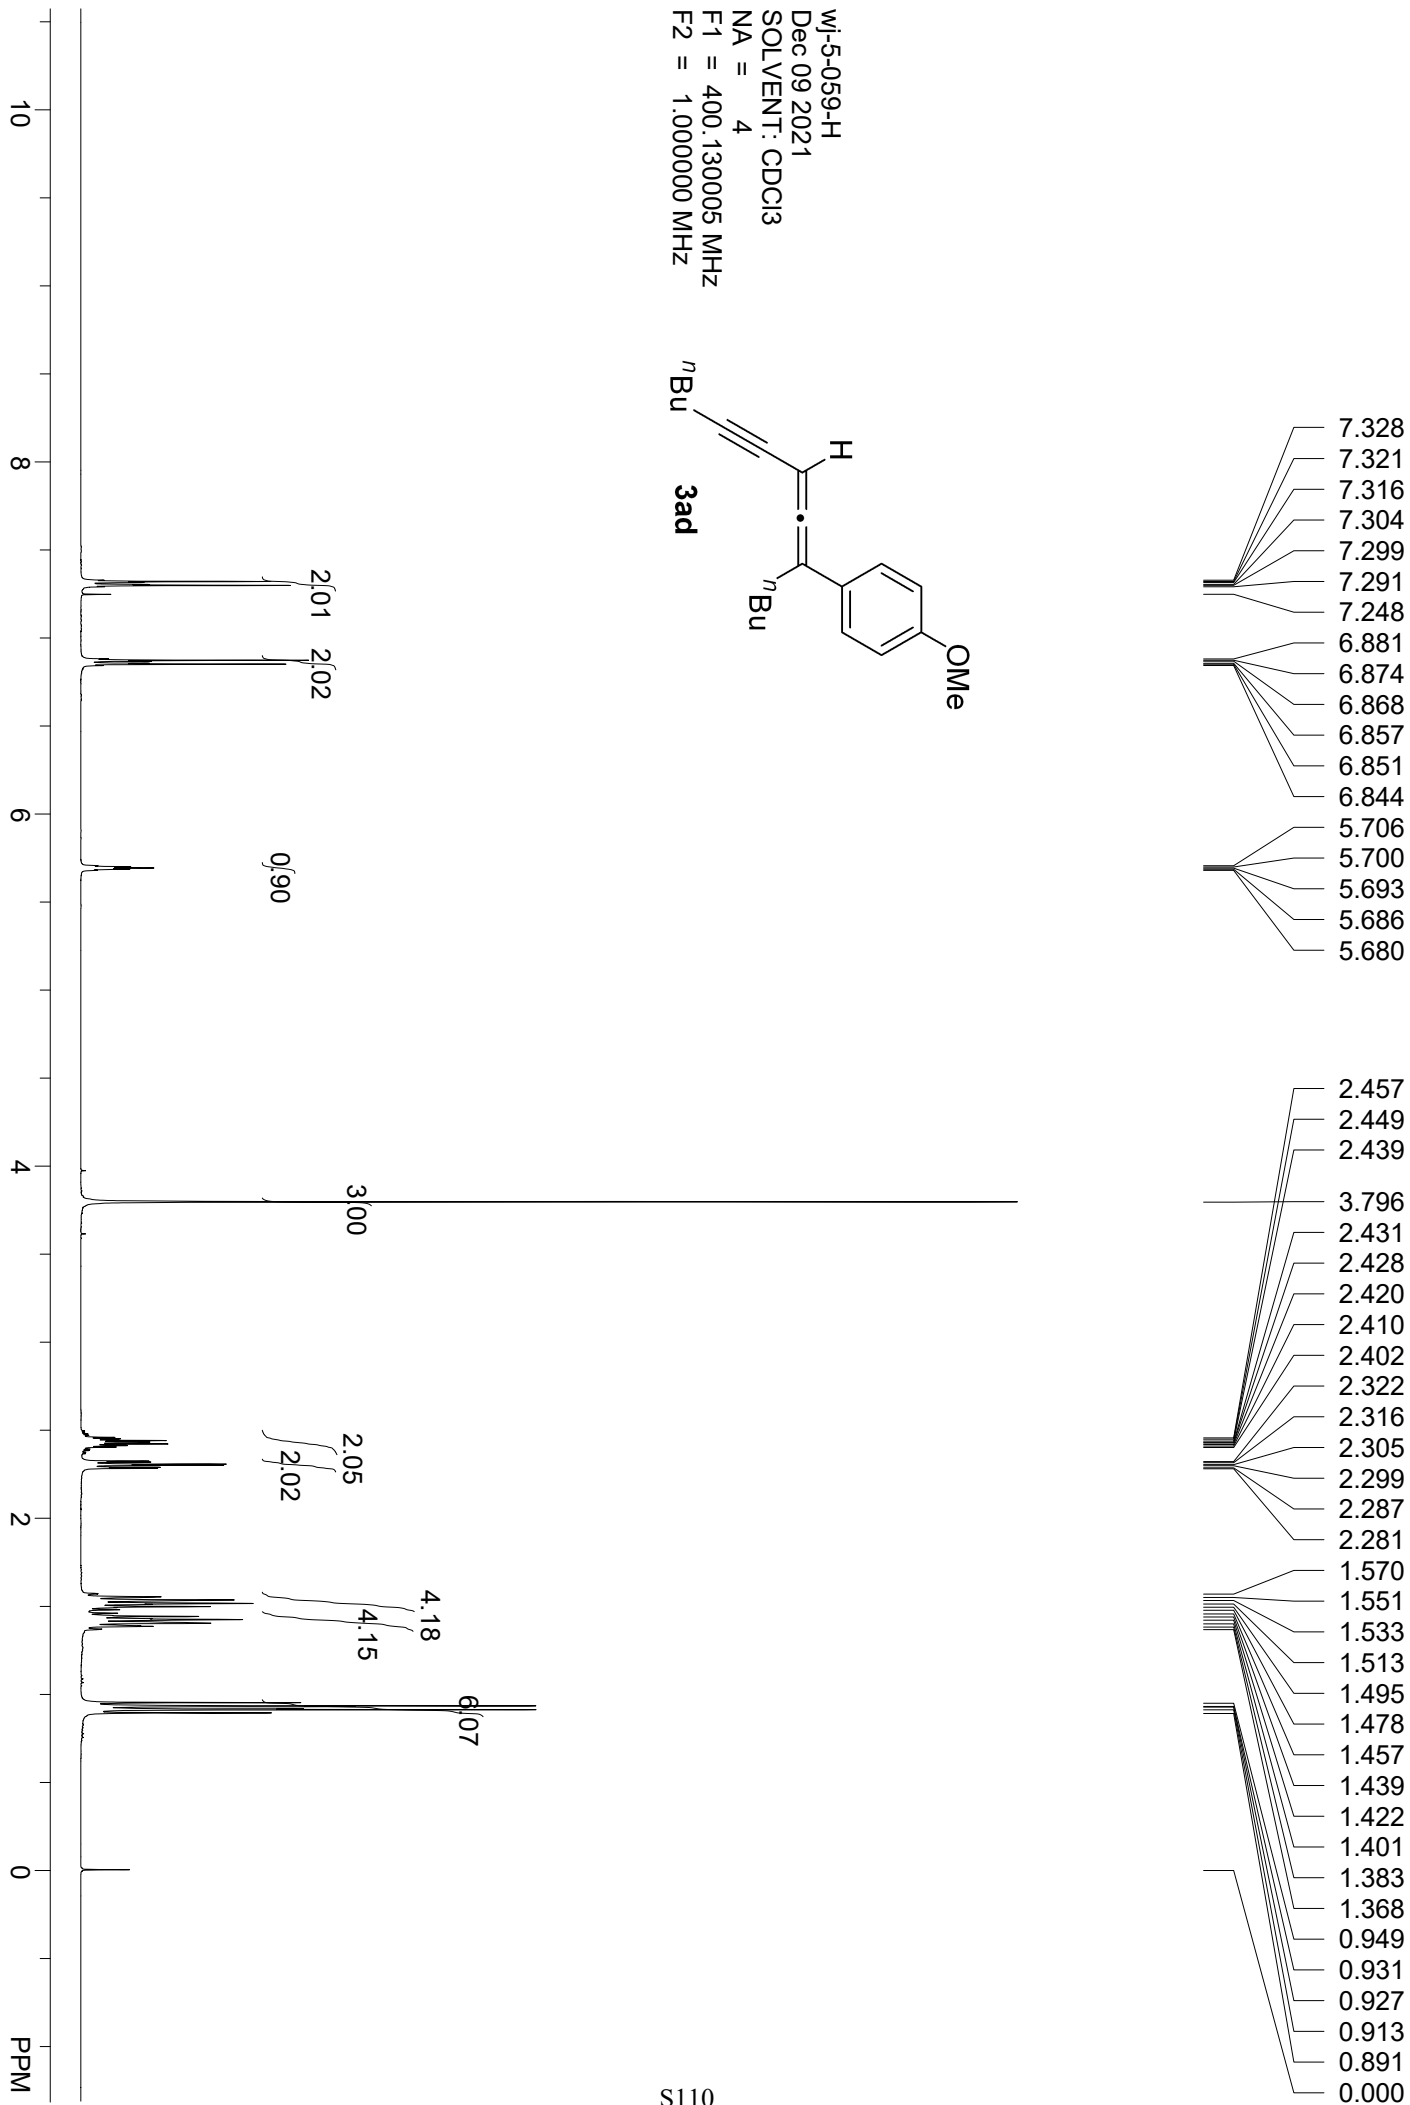

212.690

158.828

127.829  
127.520

113.861

107.178

90.627

78.817  
77.316  
77.000  
76.676  
73.200

55.251

30.832  
29.774  
29.742  
22.387  
21.969  
19.259  
13.911  
13.587

wj-5-059-C  
Dec 09 2021  
SOLVENT: CDCl3  
NA = 300  
F1 = 100.612770 MHz  
F2 = 1.000000 MHz

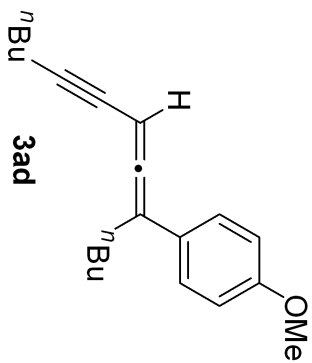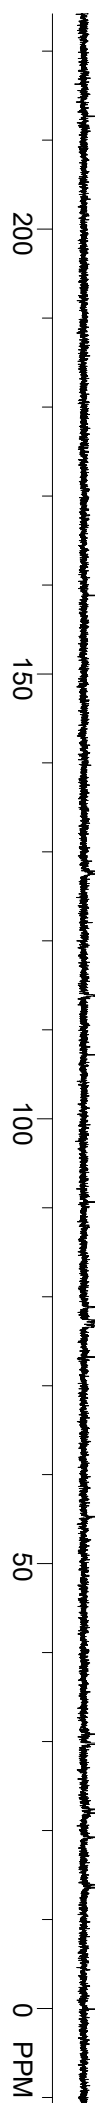

wj-5-072-H  
Dec 15 2021  
SOLVENT: CDCl3  
NA = 4  
F1 = 400.130005 MHz  
F2 = 1.000000 MHz

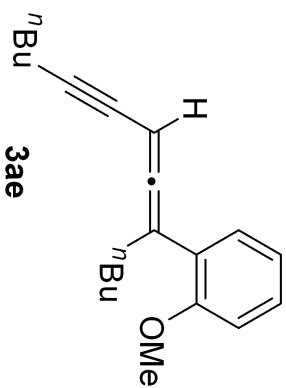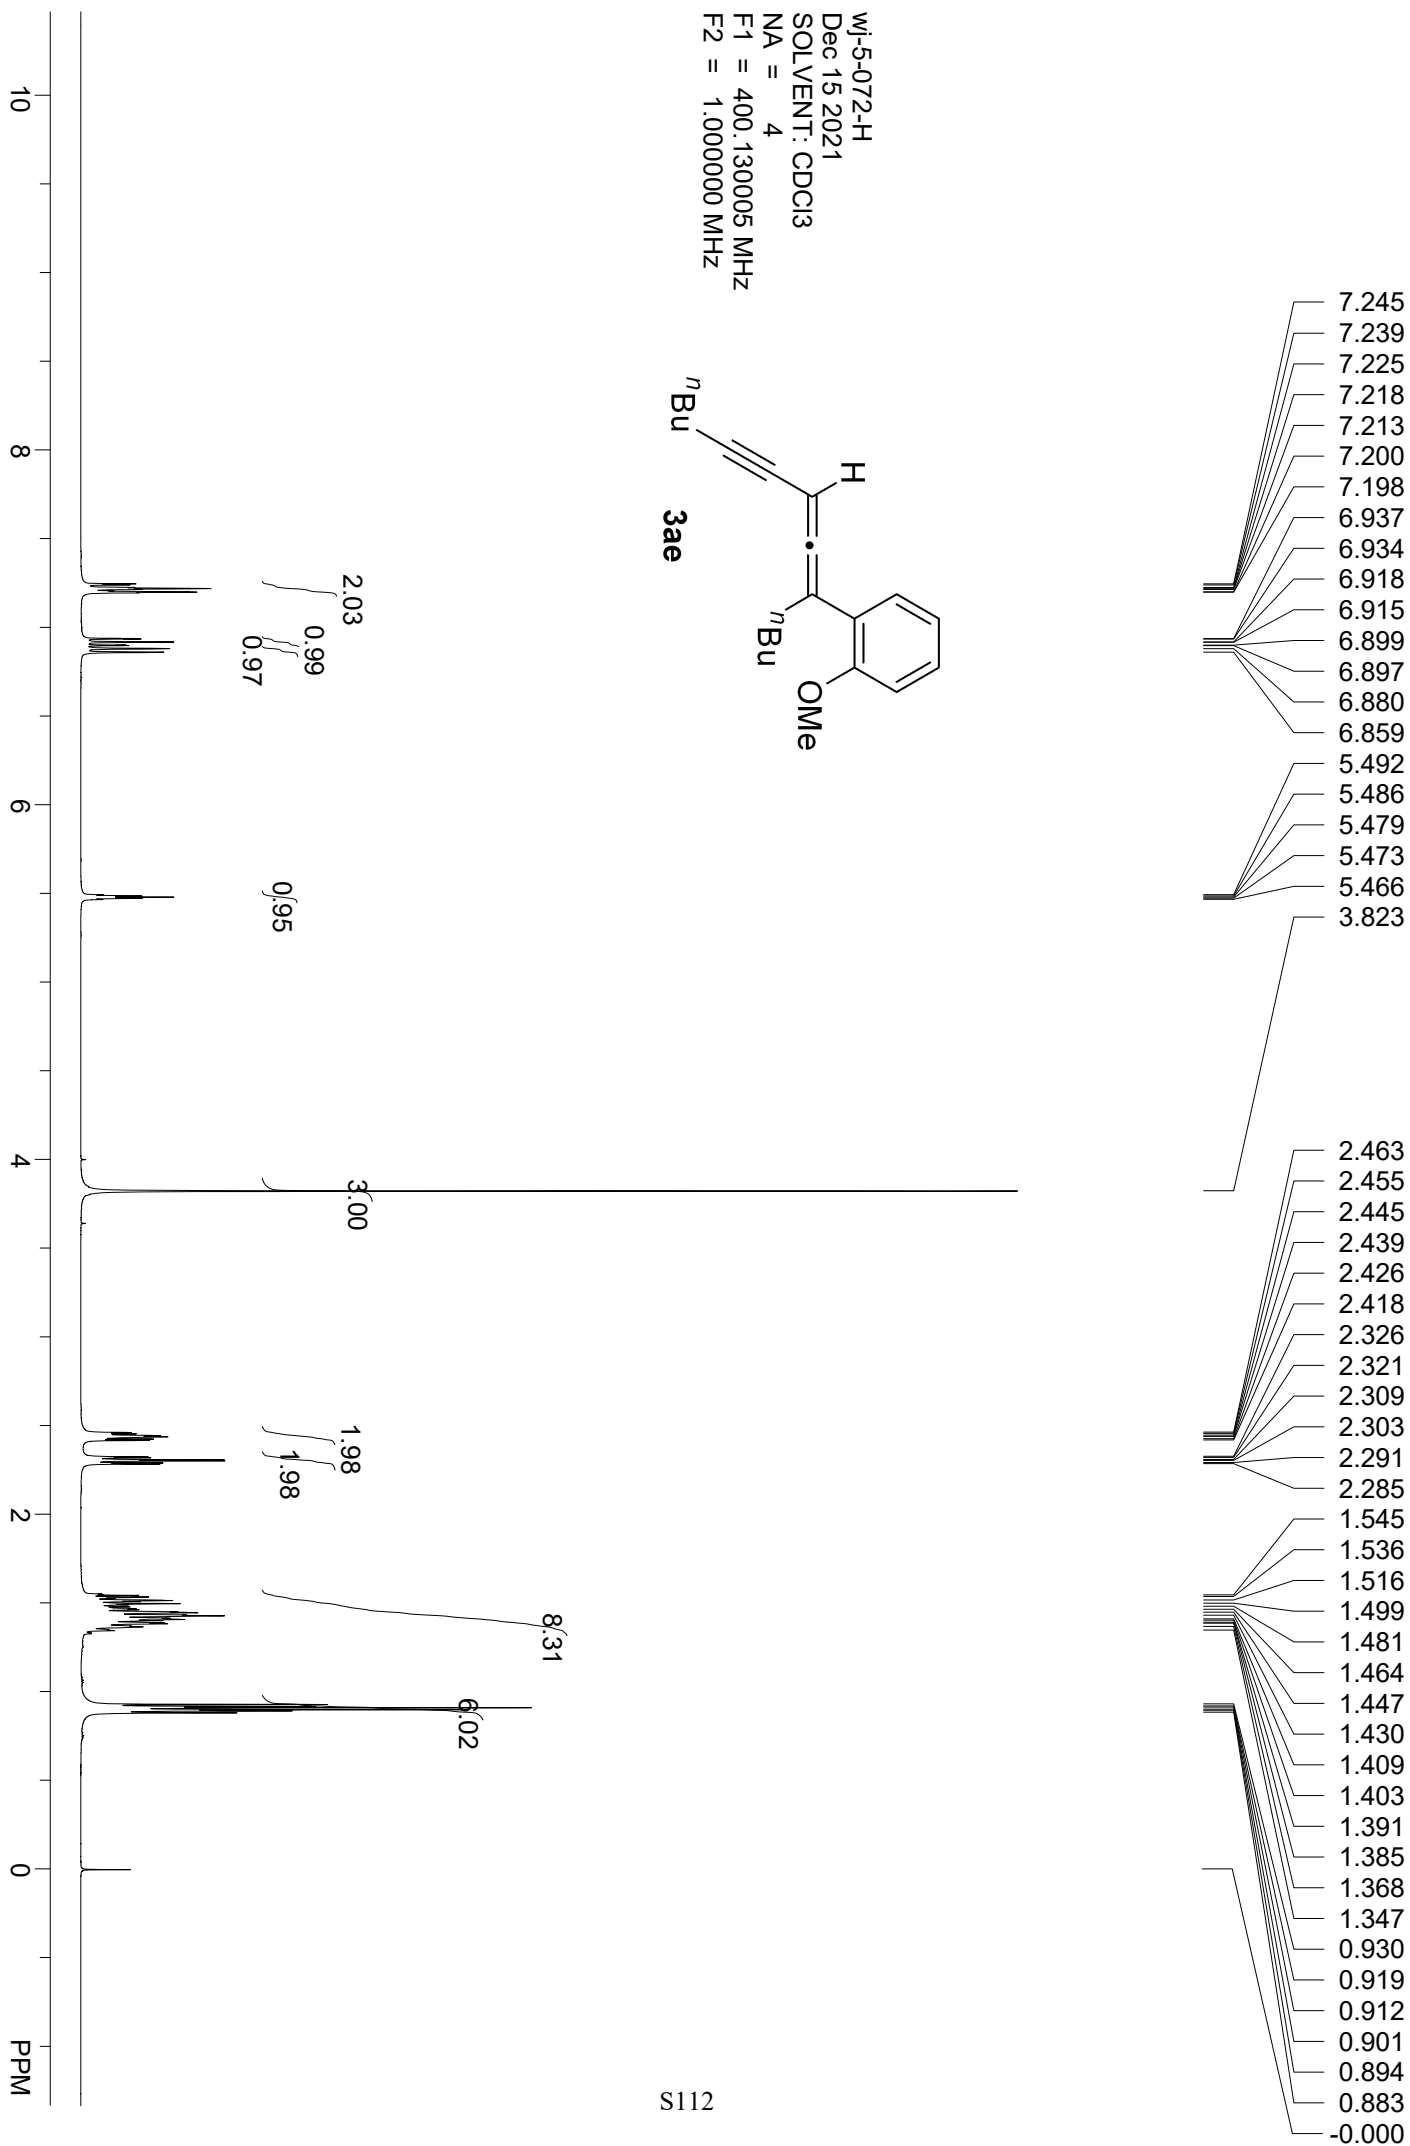

wj-5-072-C  
Dec 15 2021  
SOLVENT: CDCl3  
NA = 350  
F1 = 100.612770 MHz  
F2 = 1.000000 MHz

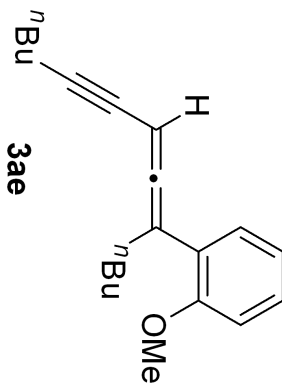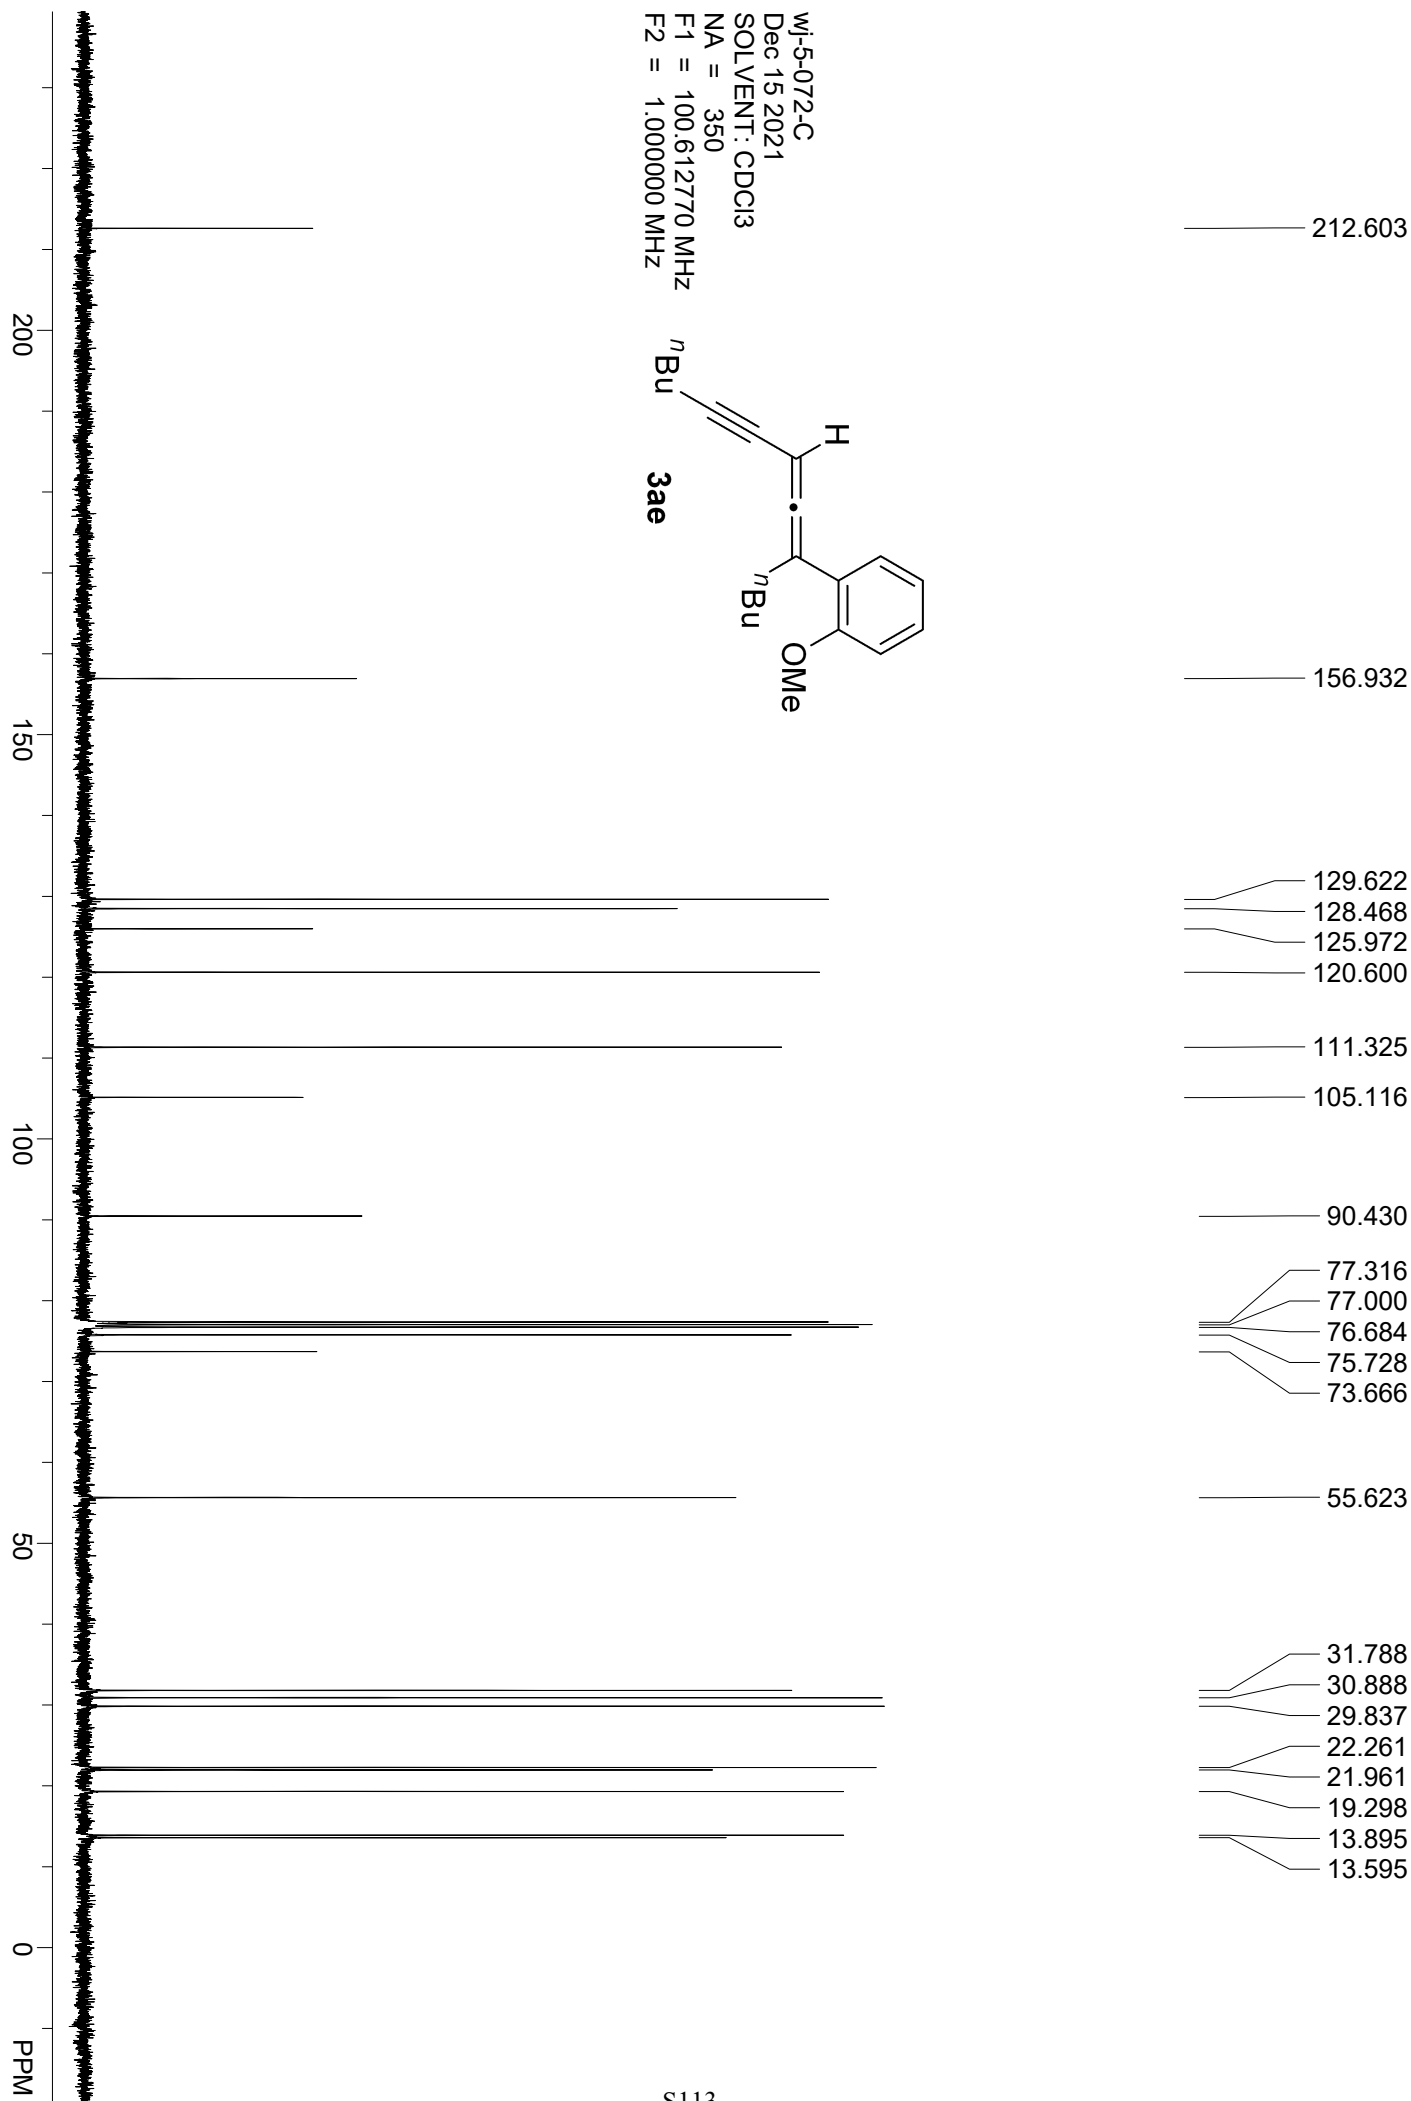

wj-5-060-H  
 Dec 10 2021  
 SOLVENT: CDCl3  
 NA = 4  
 F1 = 400.130035 MHz  
 F2 = 1.000000 MHz

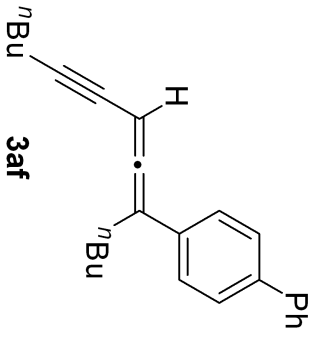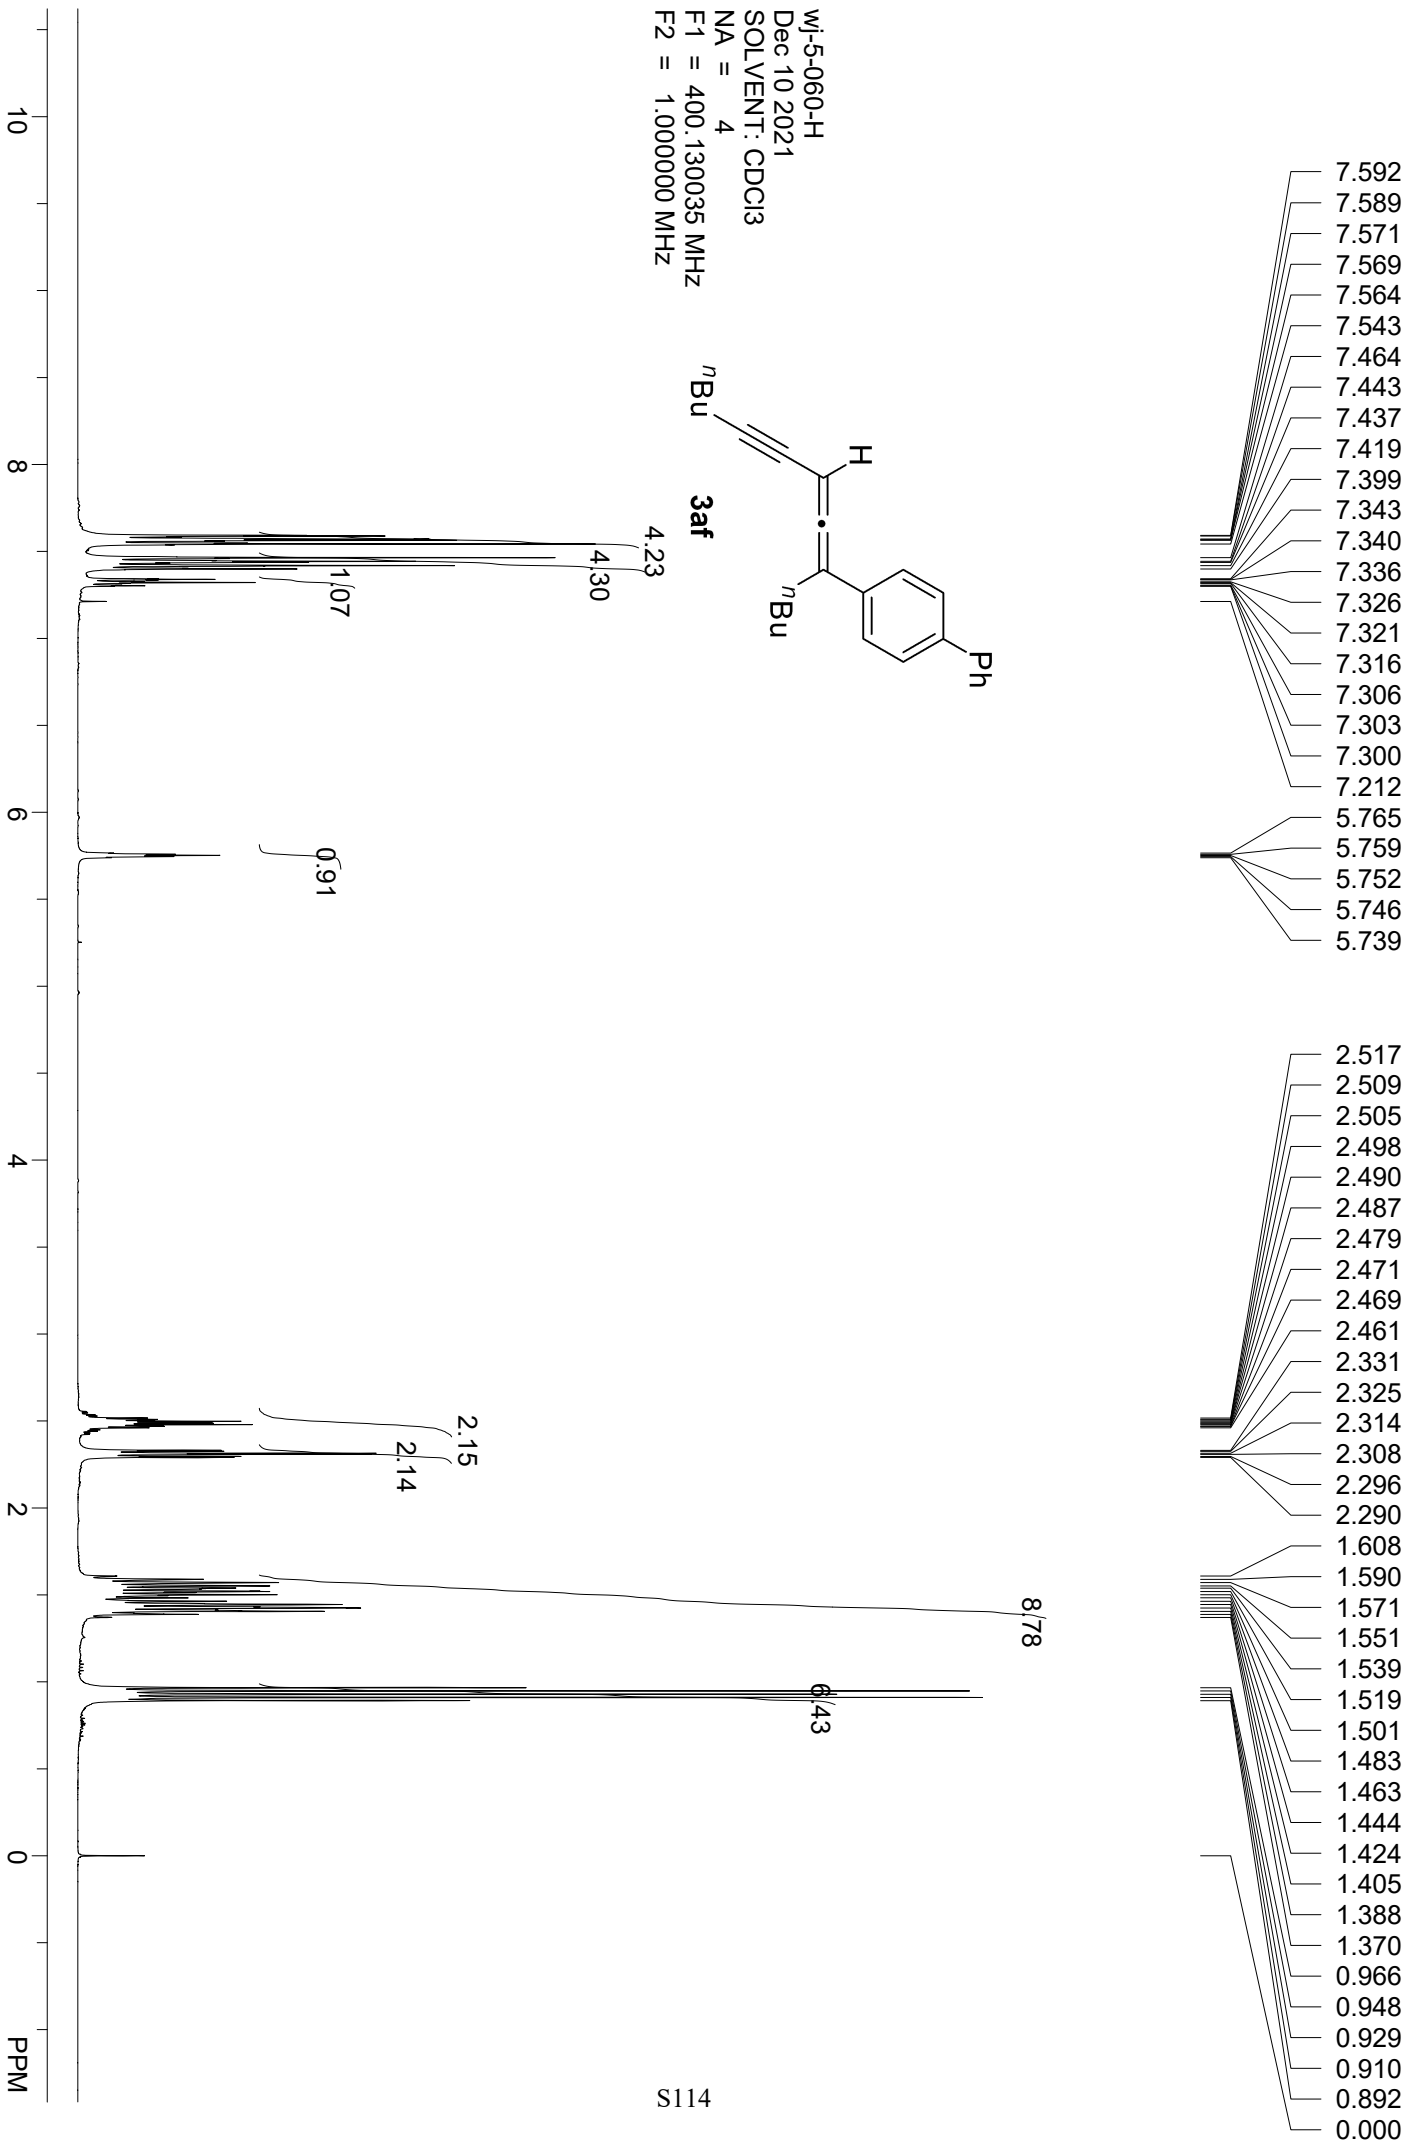

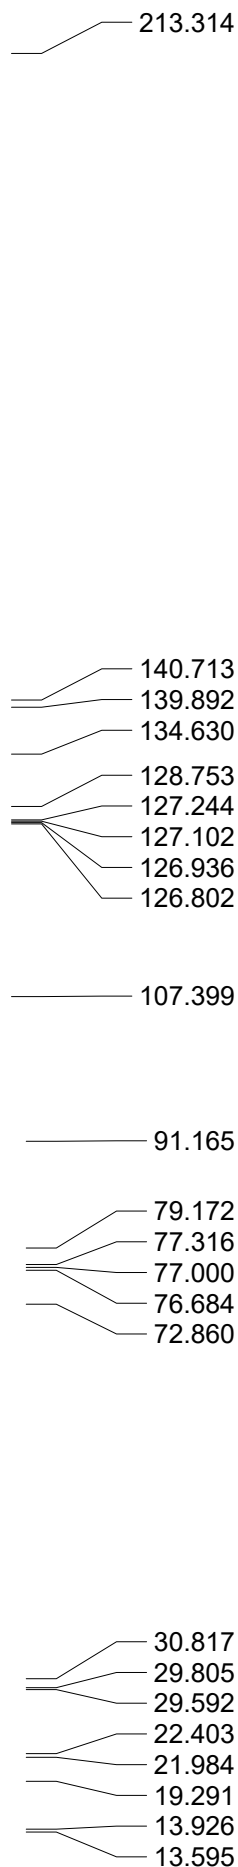

WJ-5-060-C  
 Dec 10 2021  
 SOLVENT: CDCl3  
 NA = 250  
 F1 = 100.612770 MHz  
 F2 = 1.000000 MHz

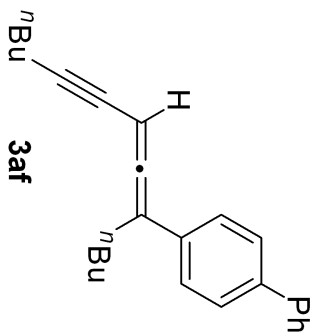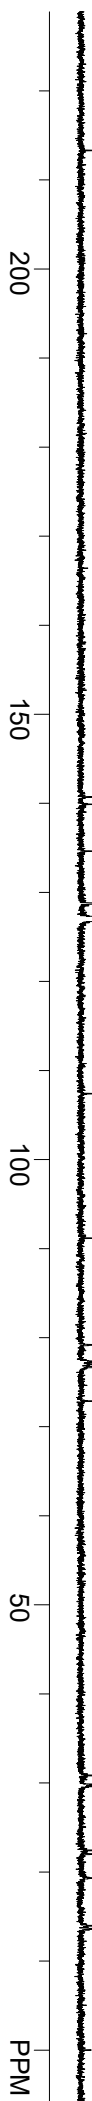

WJ-5-073-H  
 Dec 17 2021  
 SOLVENT: CDCl3  
 NA = 4  
 F1 = 400.130005 MHz  
 F2 = 1.000000 MHz

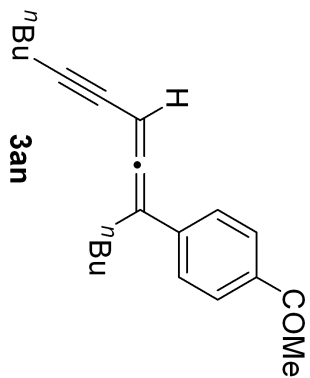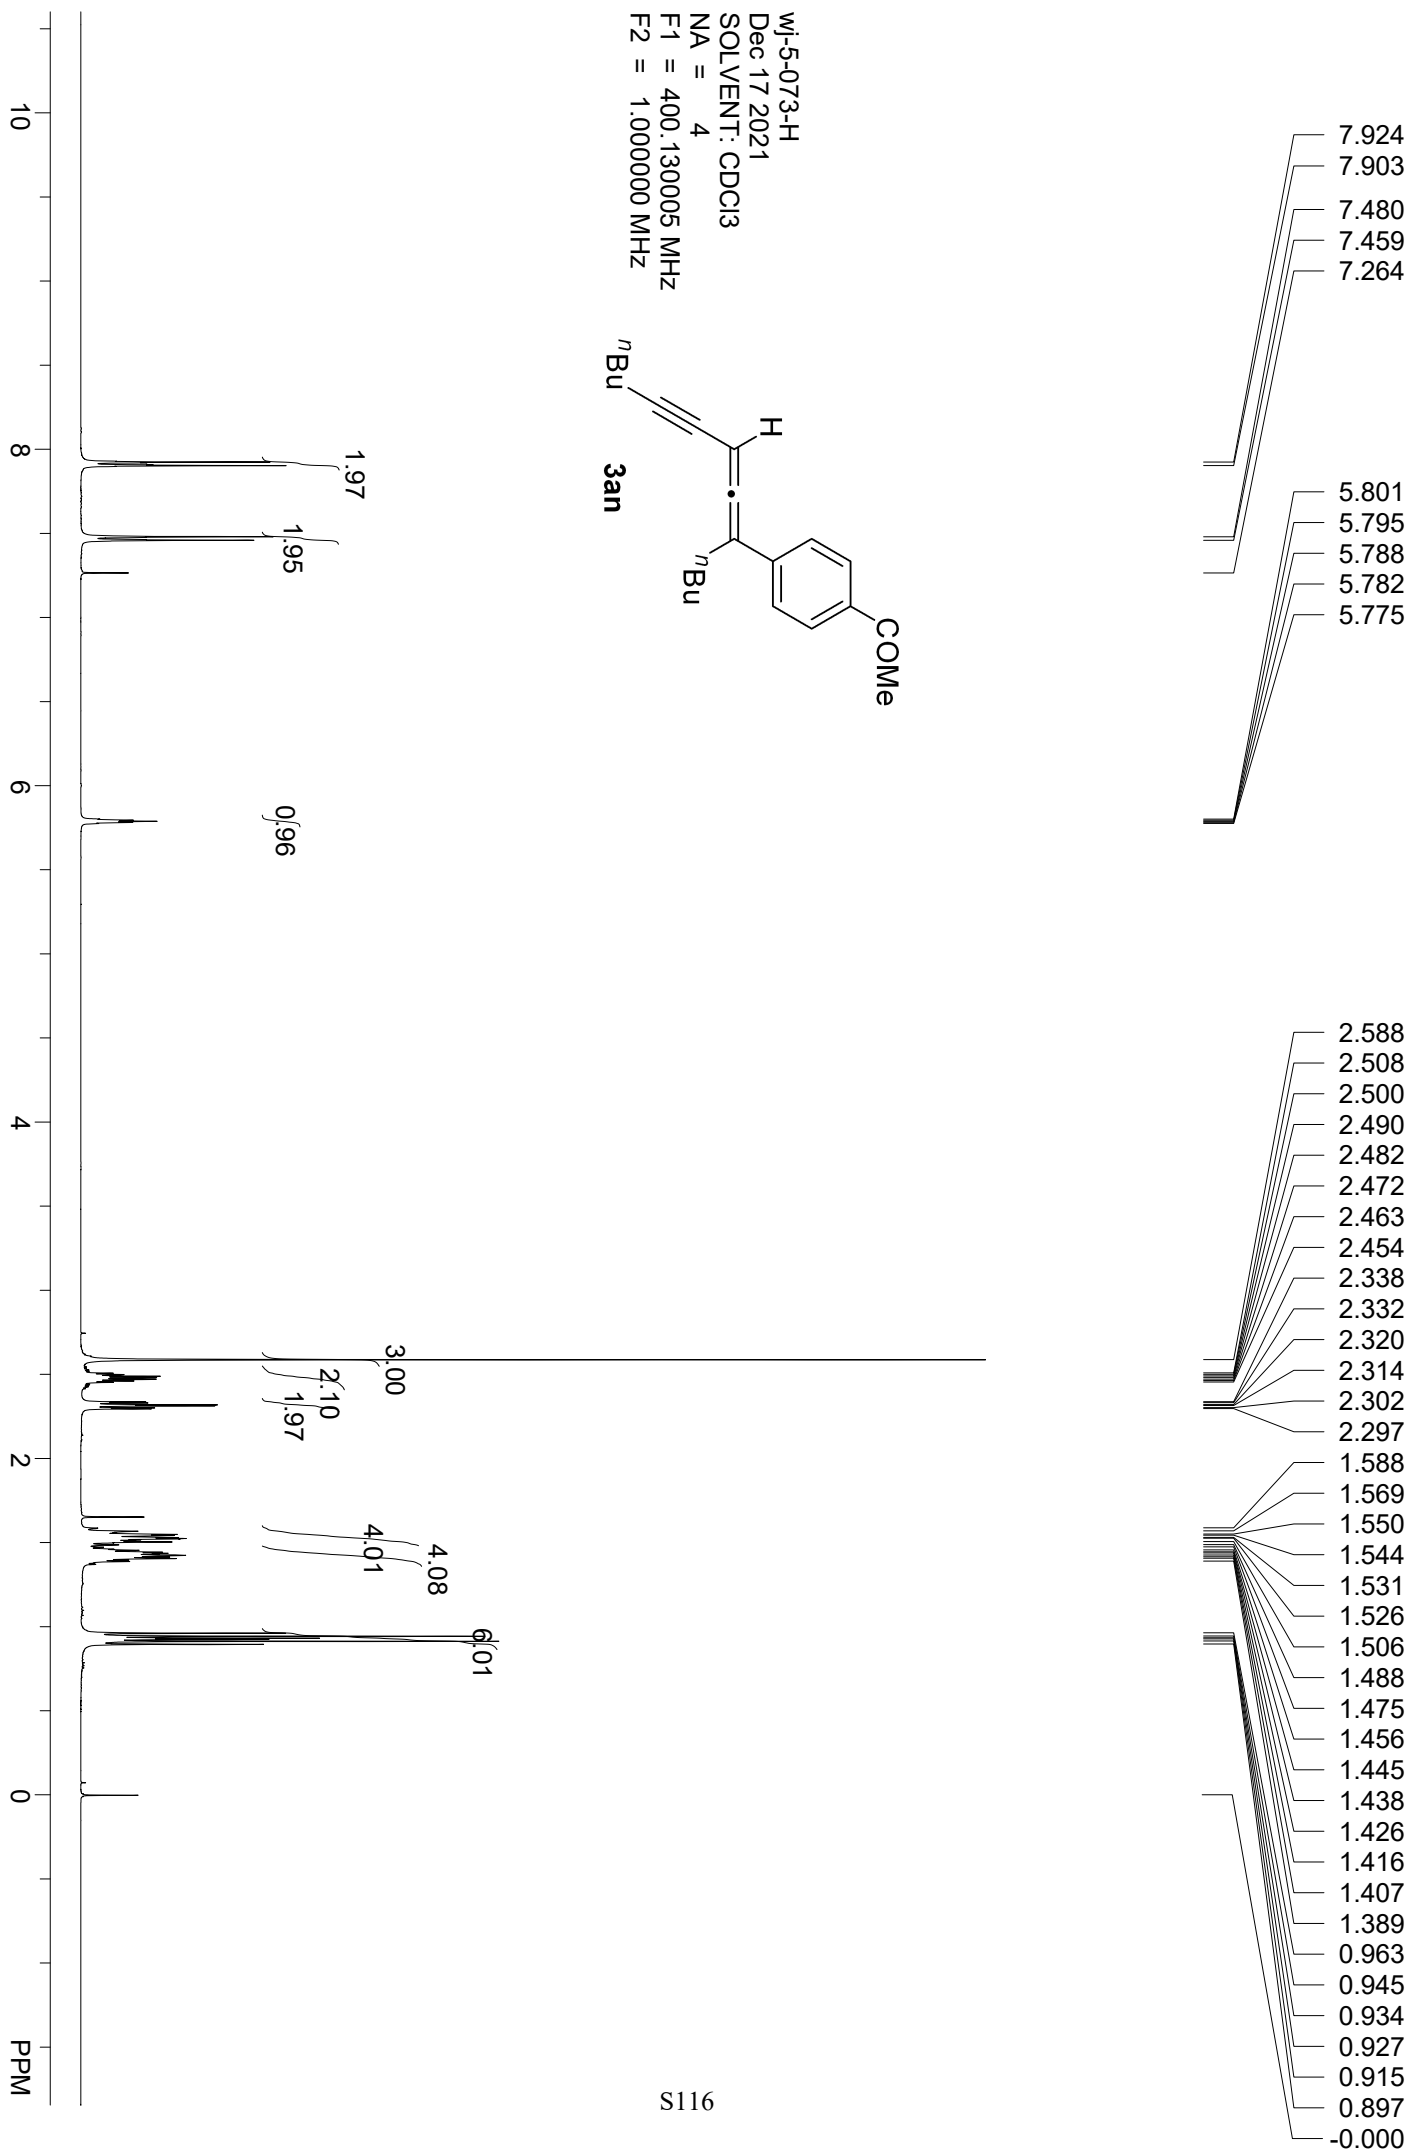



WJ-5-073-C  
Dec 17 2021  
SOLVENT: CDCl3  
NA = 400  
F1 = 100.612770 MHz  
F2 = 1.000000 MHz

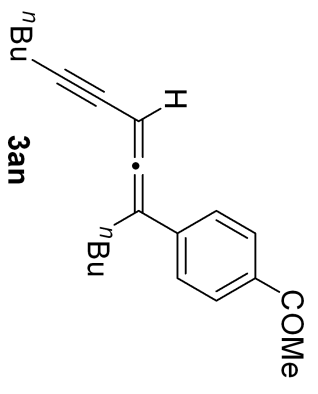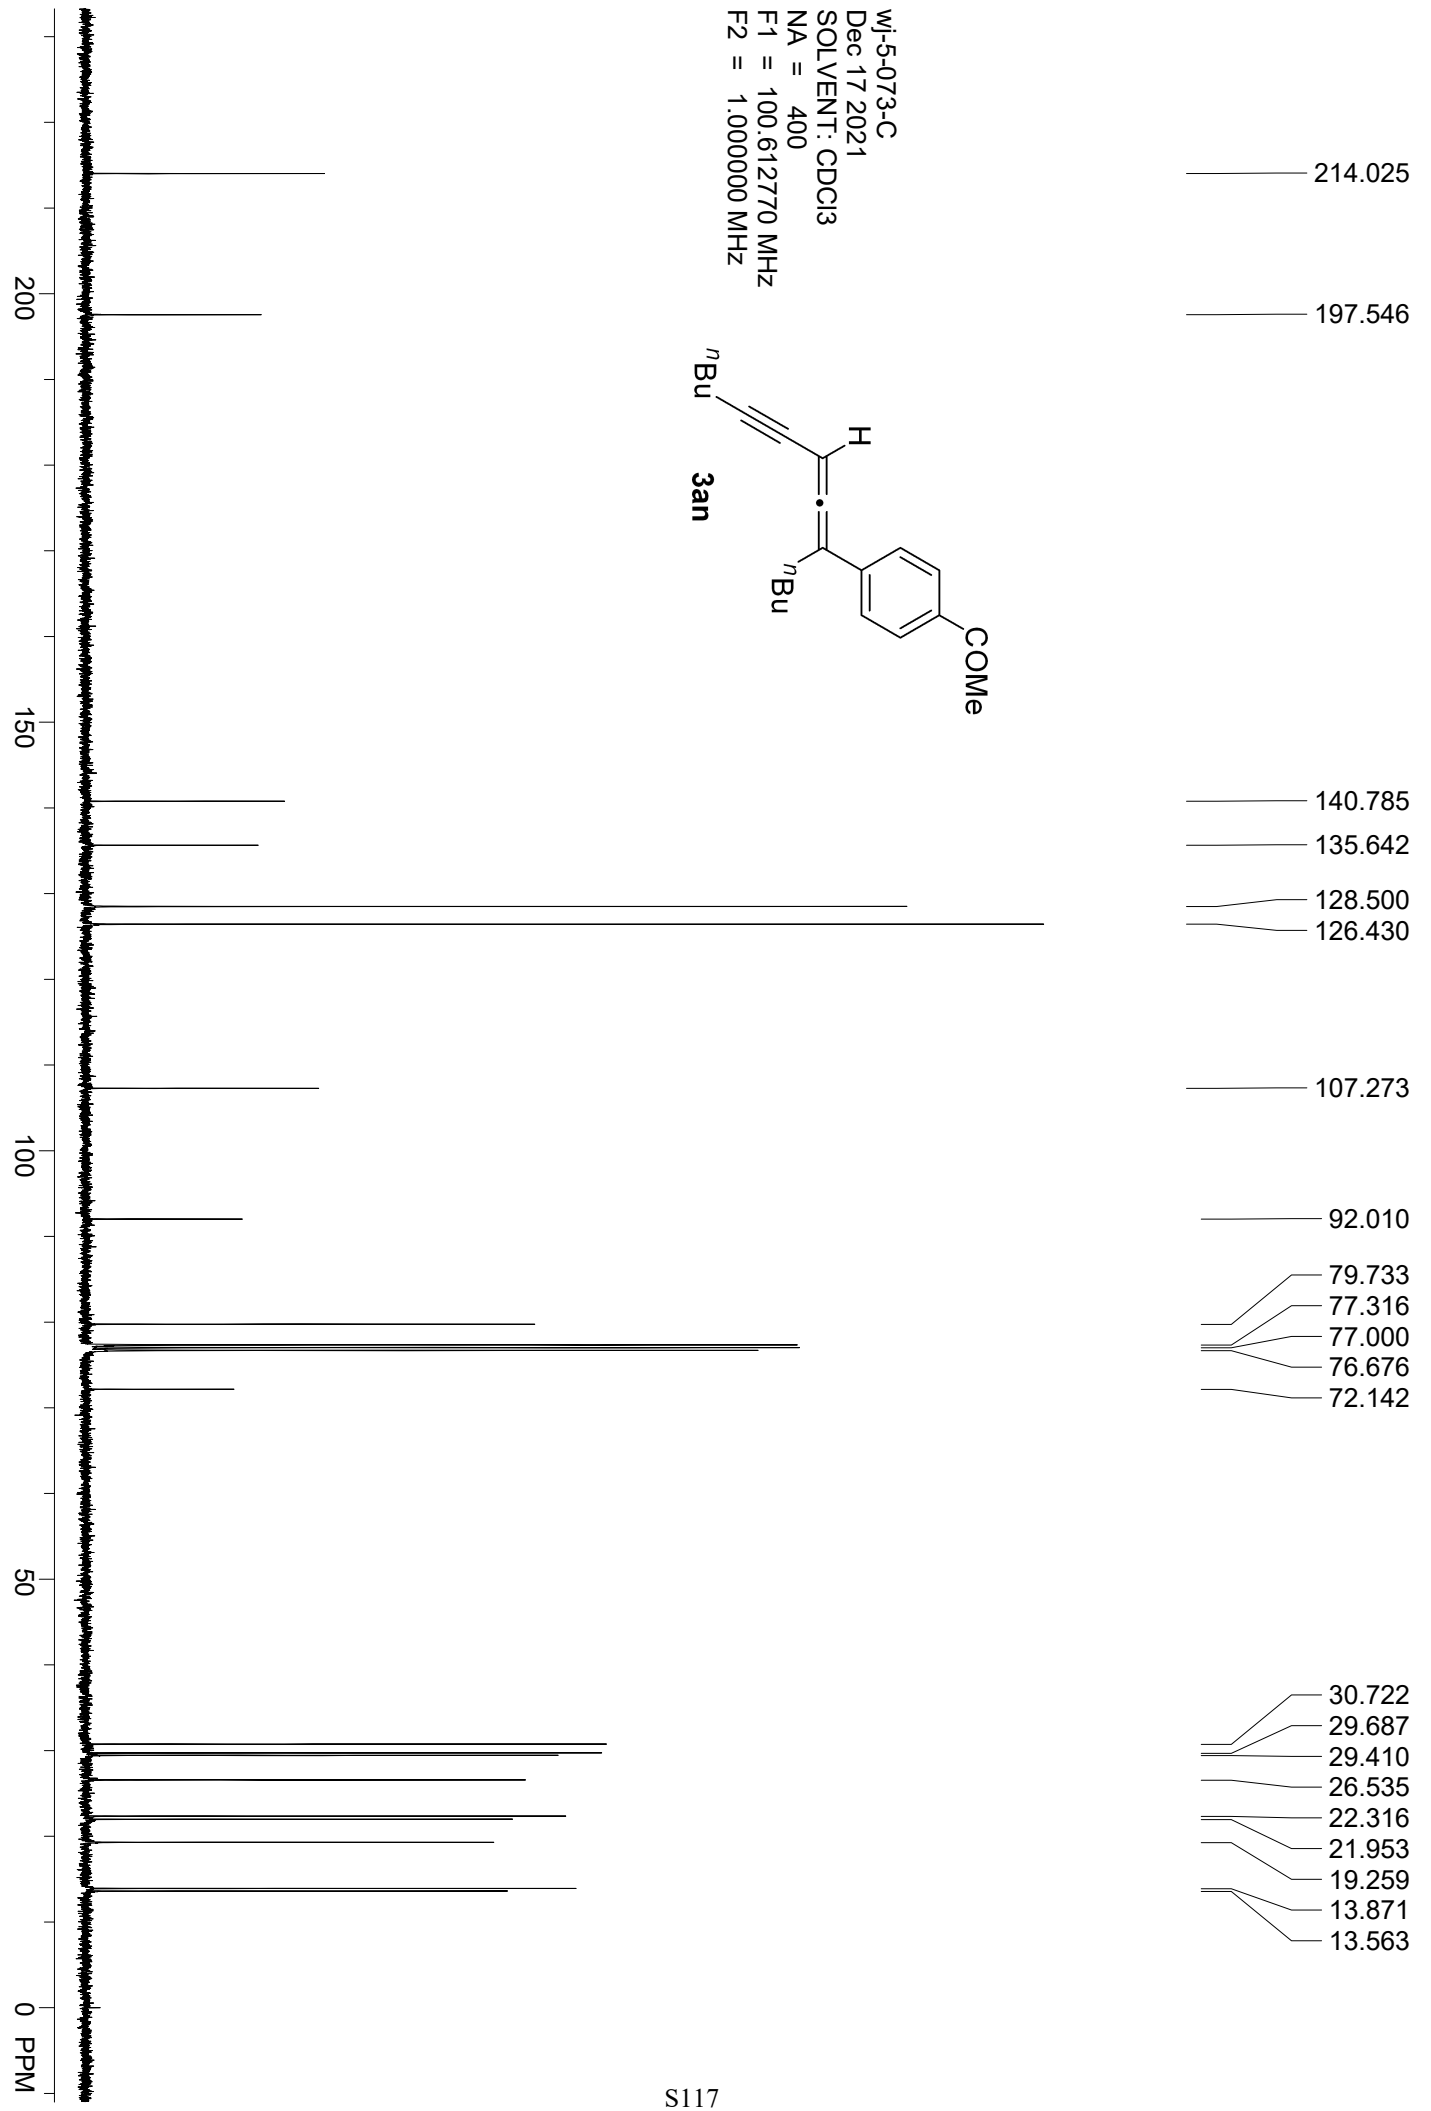

wf-3-100-H  
 May 11 2021  
 SOLVENT: CDCl3  
 NA = 4  
 F1 = 400.130035 MHz  
 F2 = 1.000000 MHz

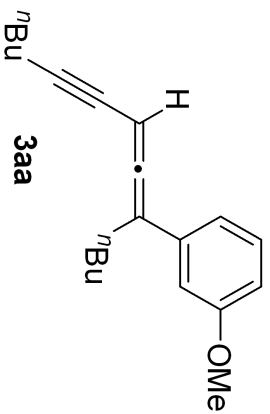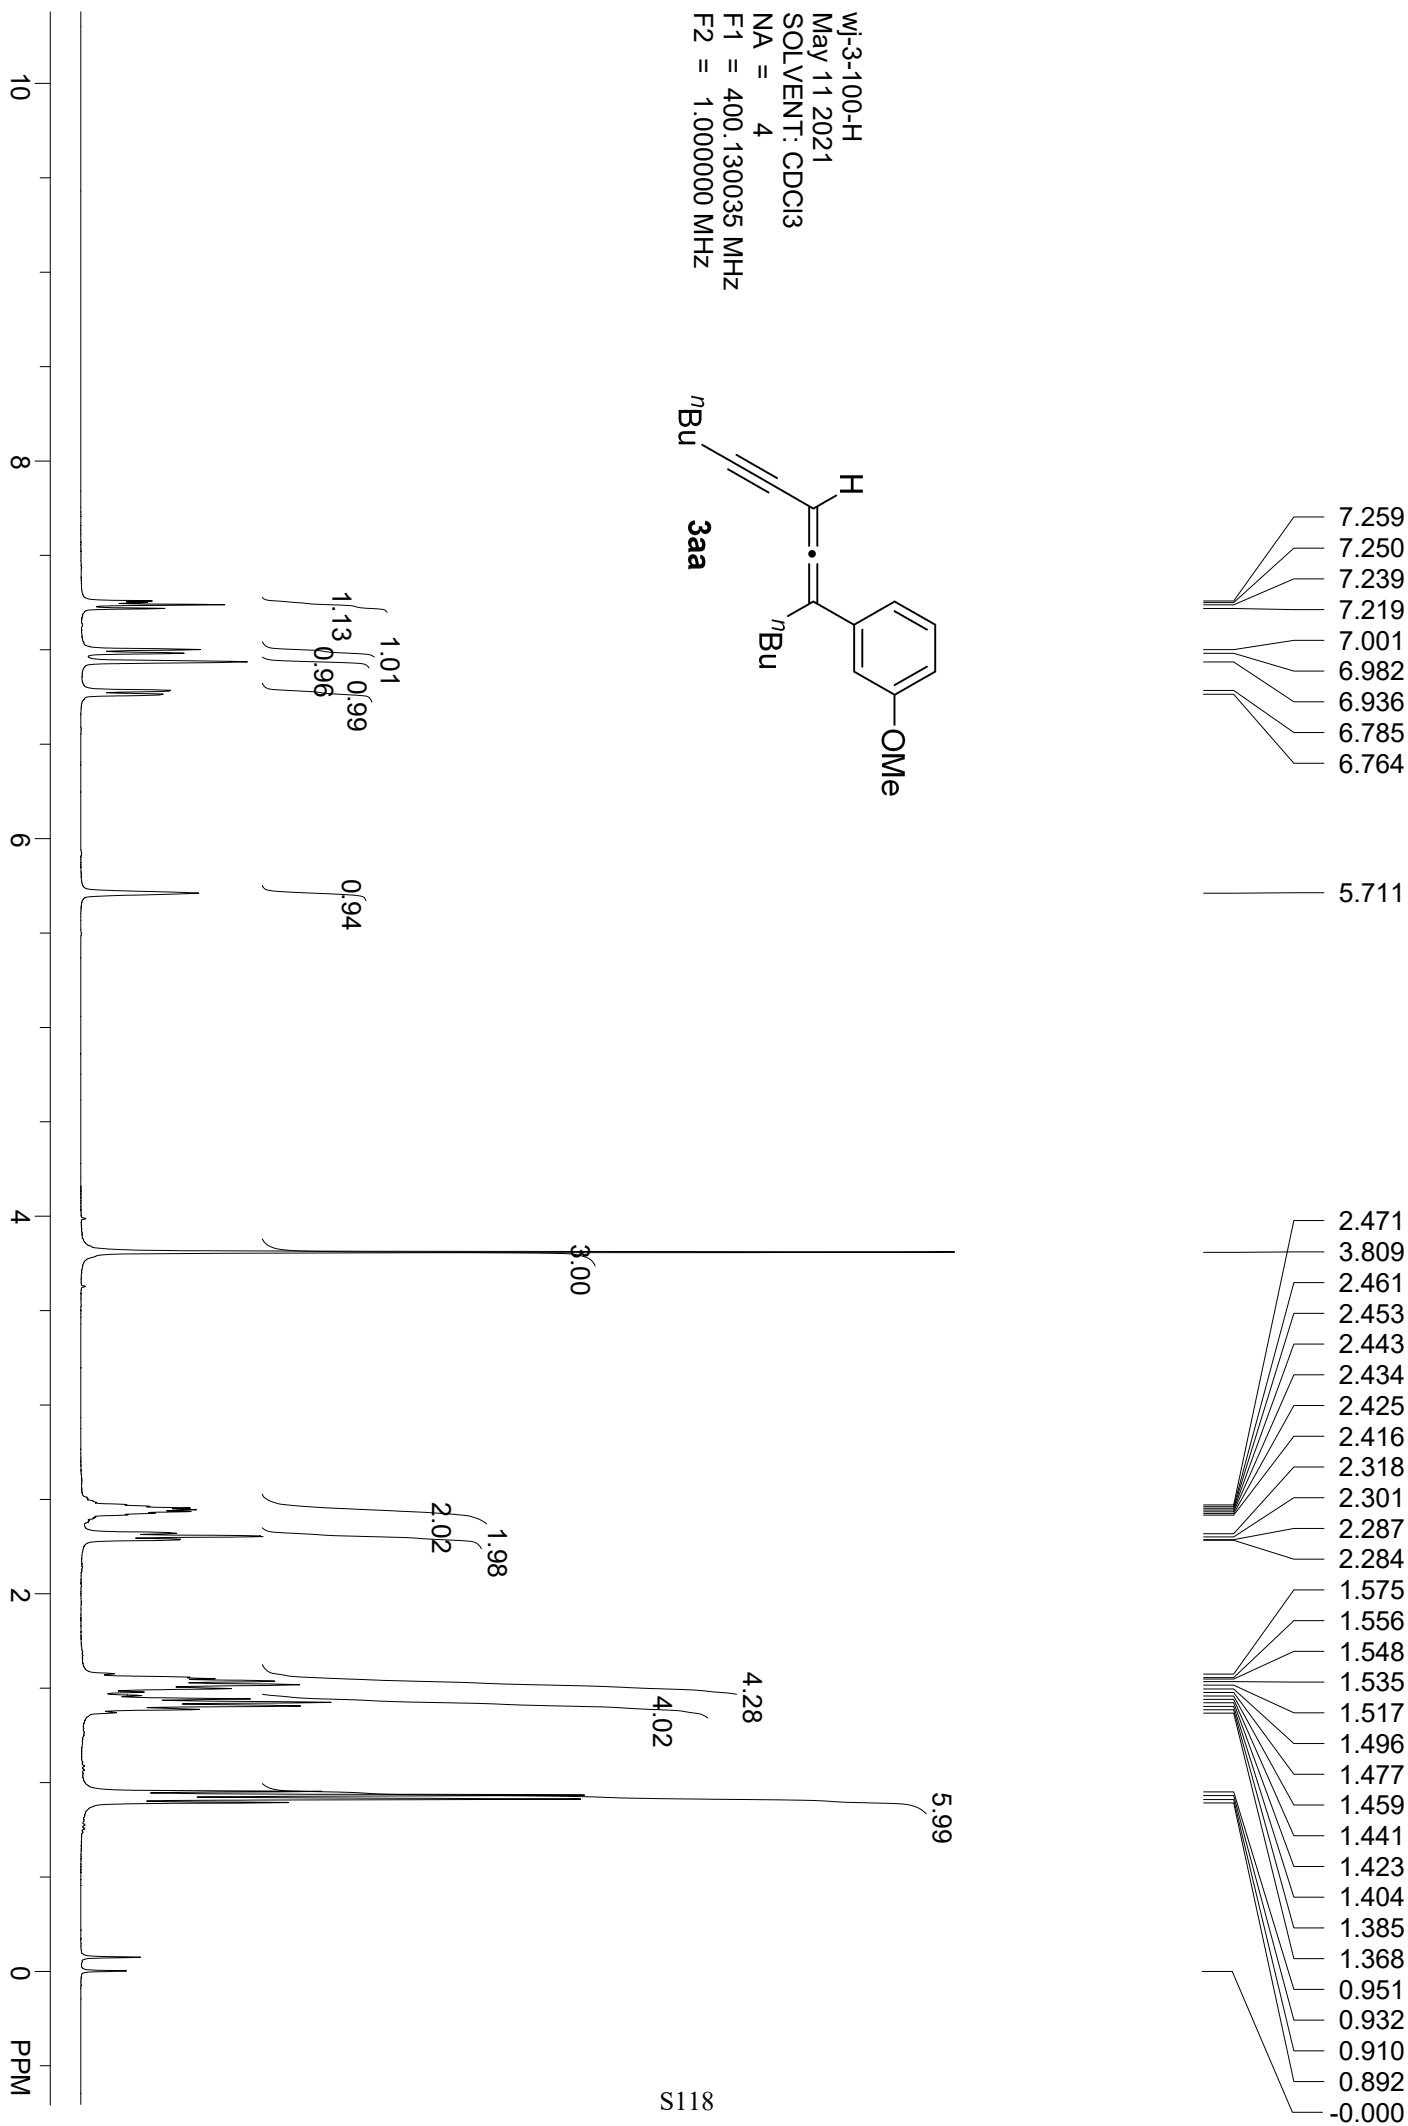

wj-3-100-C  
May 11 2021  
SOLVENT: CDCl3  
NA = 200  
F1 = 100.612770 MHz  
F2 = 1.000000 MHz

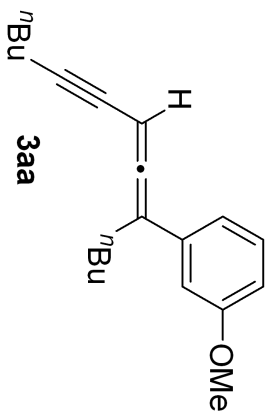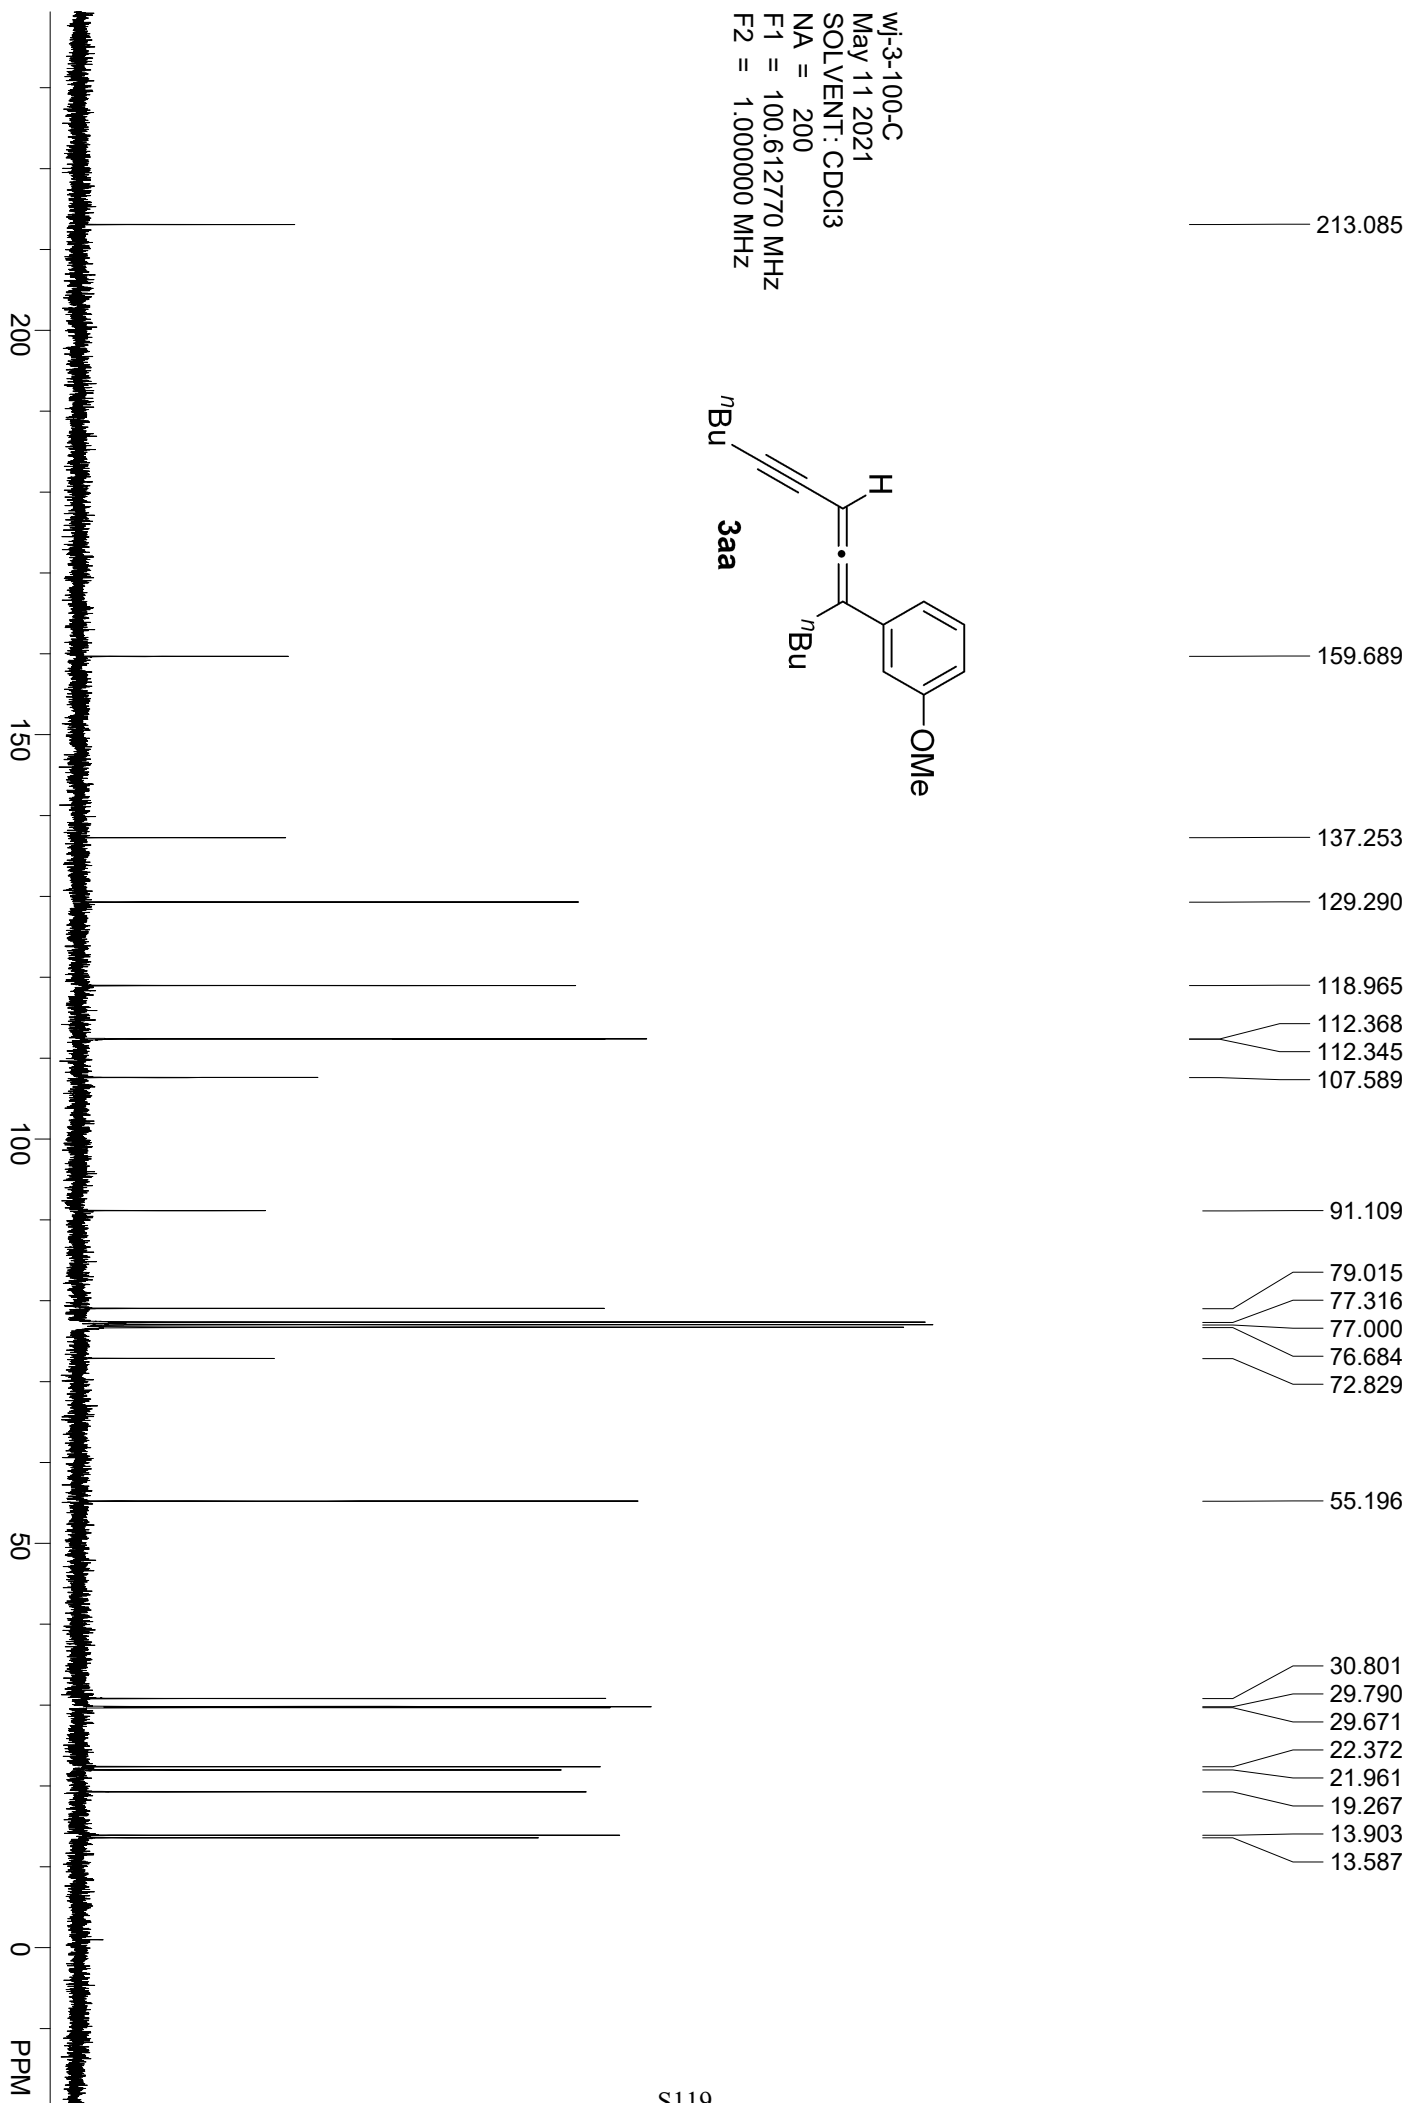

wf-5-095-H  
 Dec 30 2021  
 SOLVENT: CDCl3  
 NA = 4  
 F1 = 400.130005 MHz  
 F2 = 1.000000 MHz

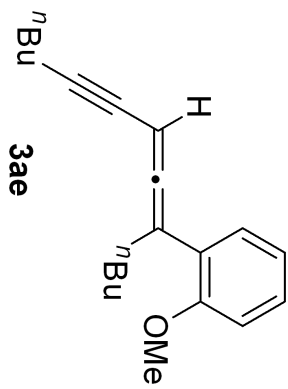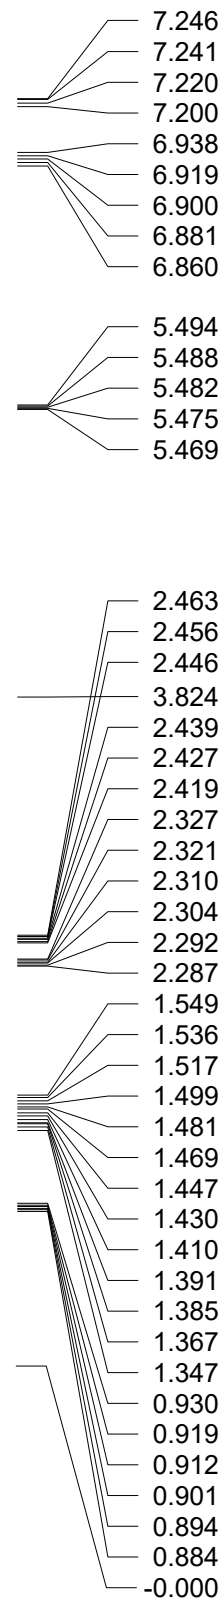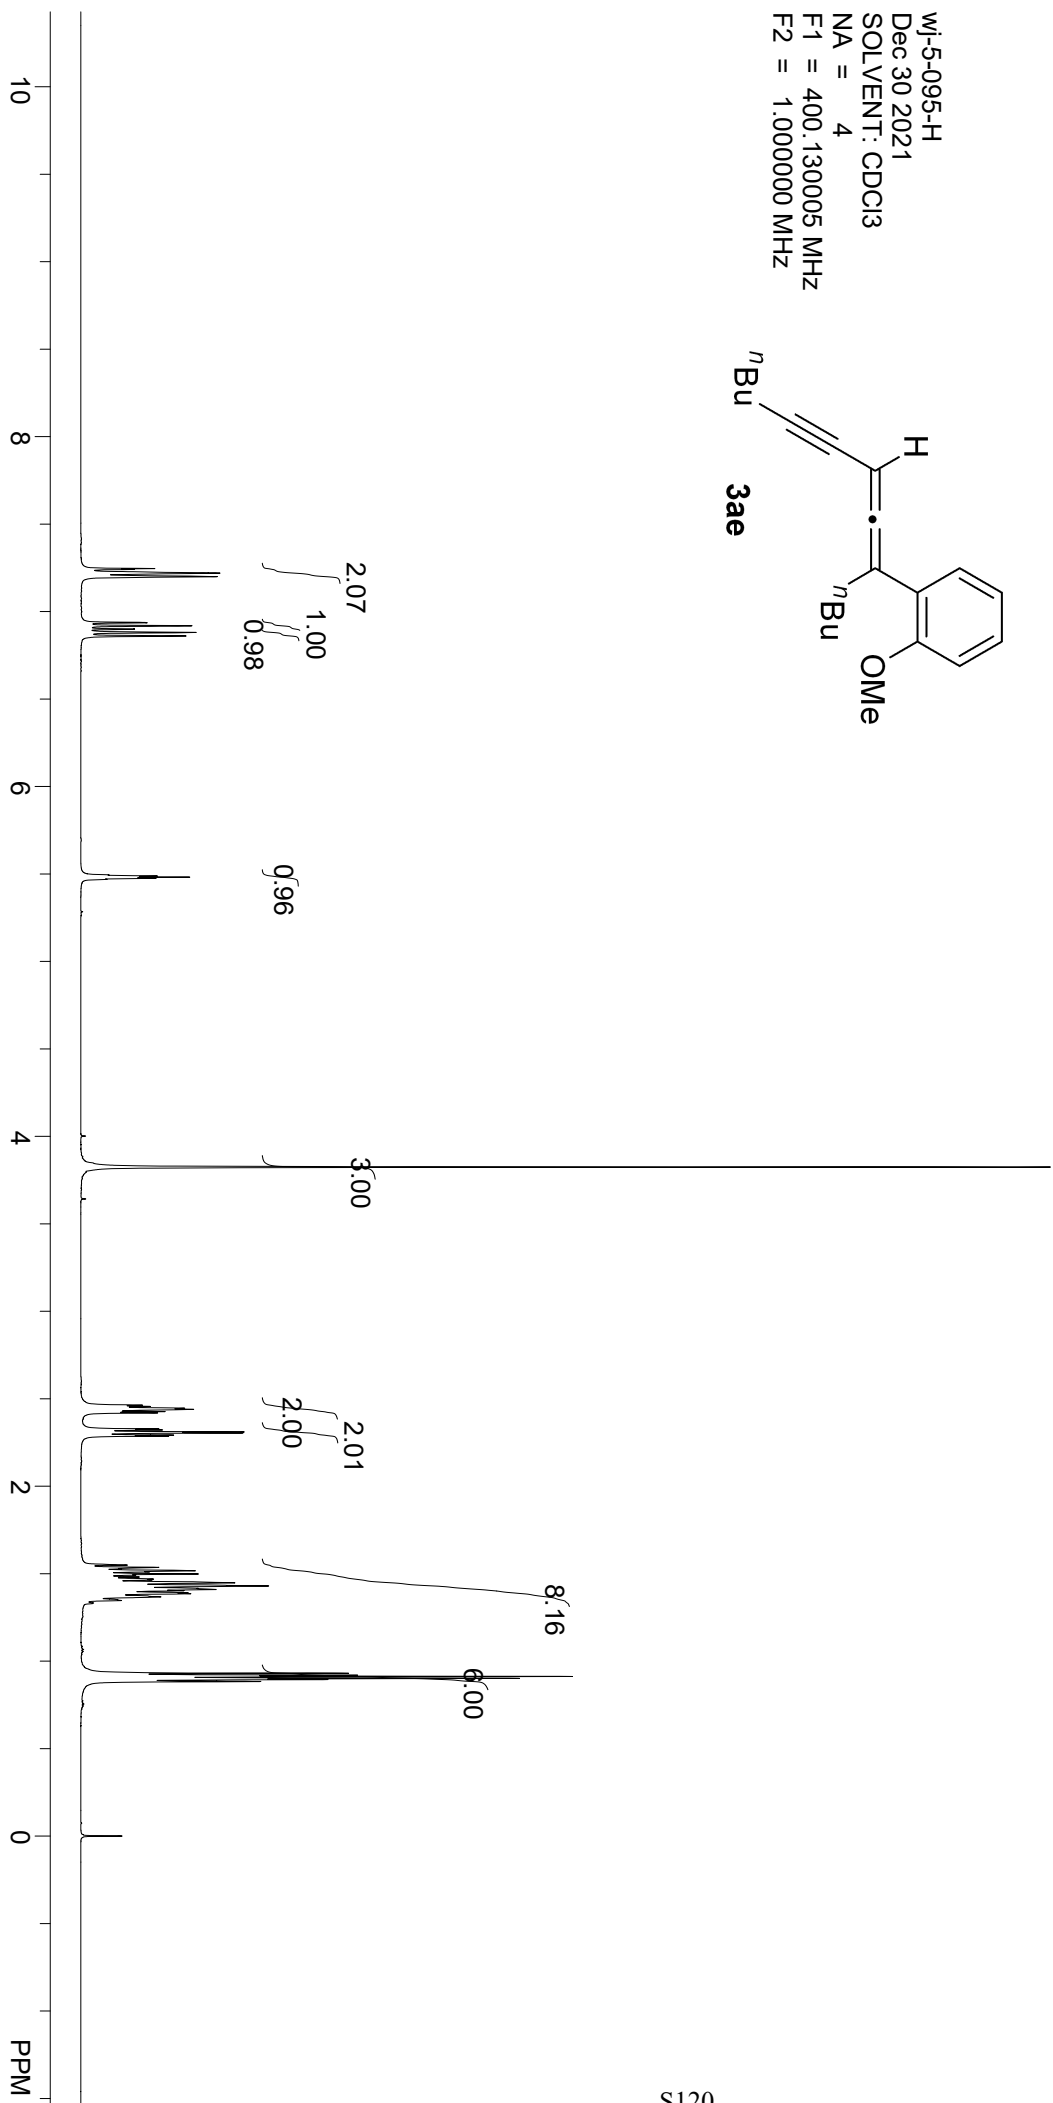

WJ-5-095-C  
Dec 30 2021  
SOLVENT: CDCl3  
NA = 350  
F1 = 100.612770 MHz  
F2 = 1.000000 MHz

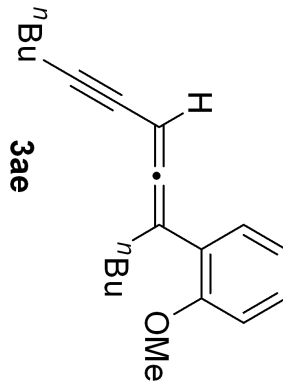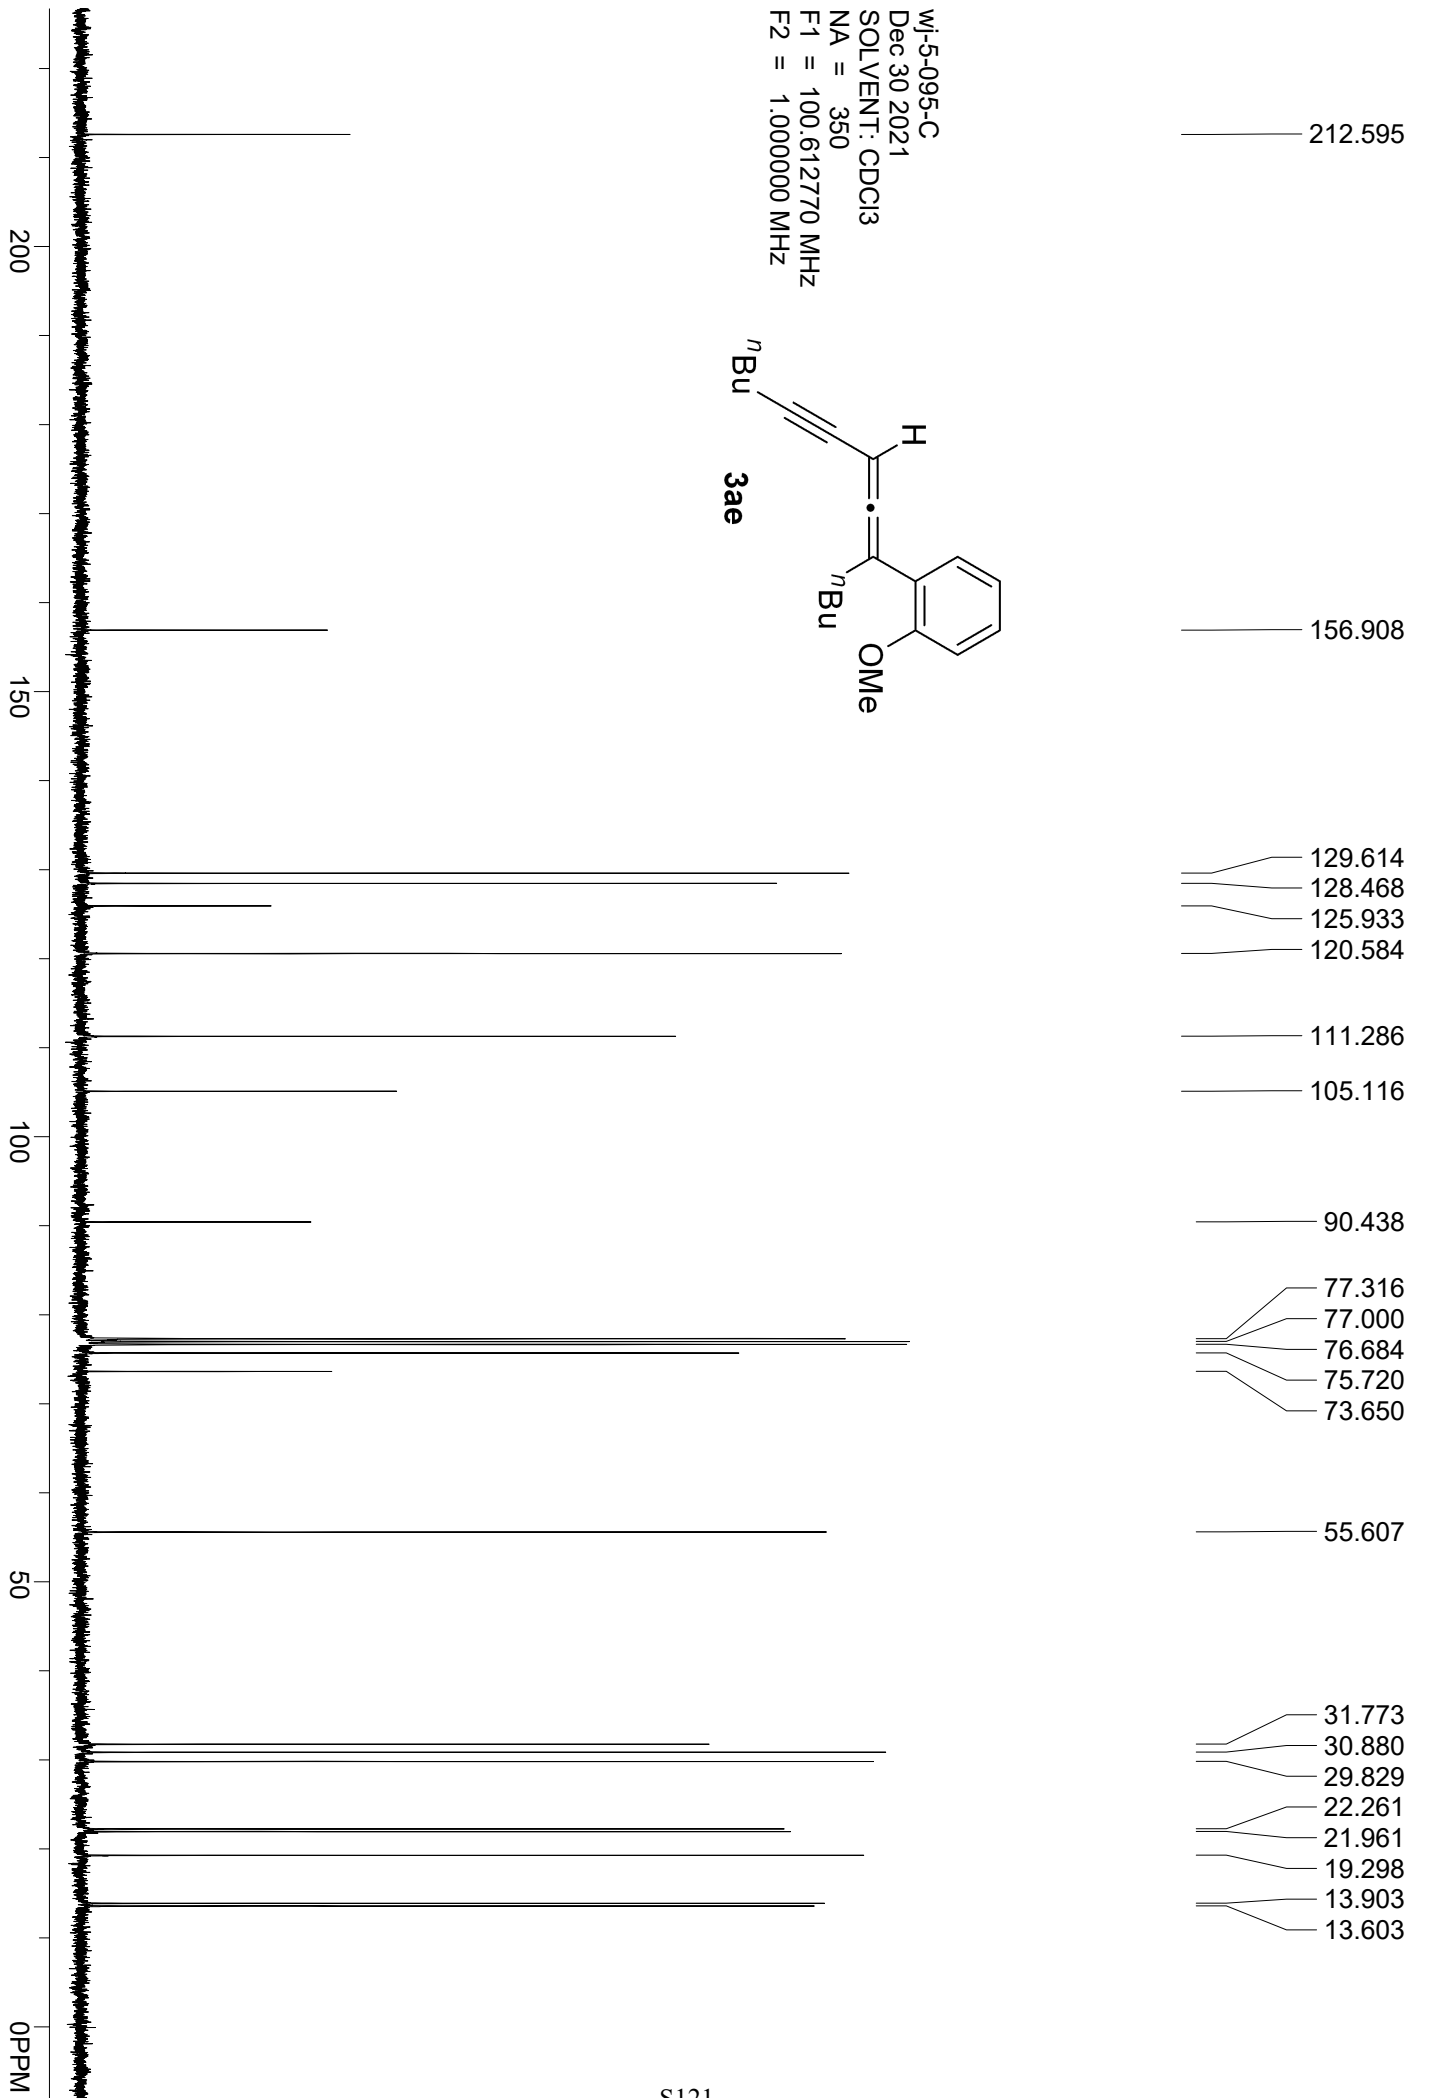

wf-3-138-H  
 Jun 08 2021  
 SOLVENT: CDCl3  
 NA = 4  
 F1 = 400.130035 MHz  
 F2 = 1.000000 MHz

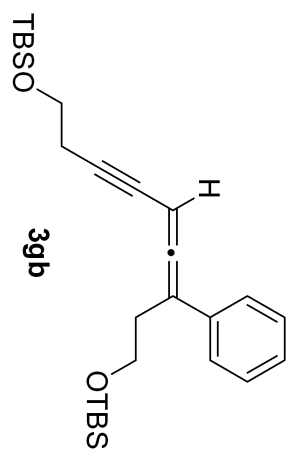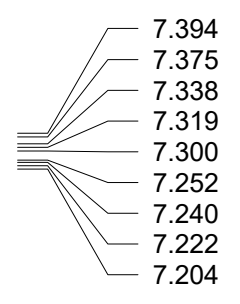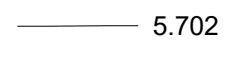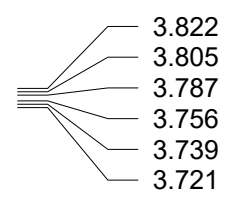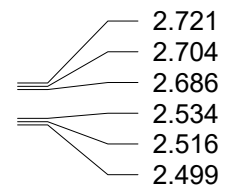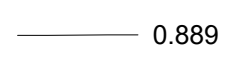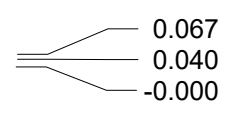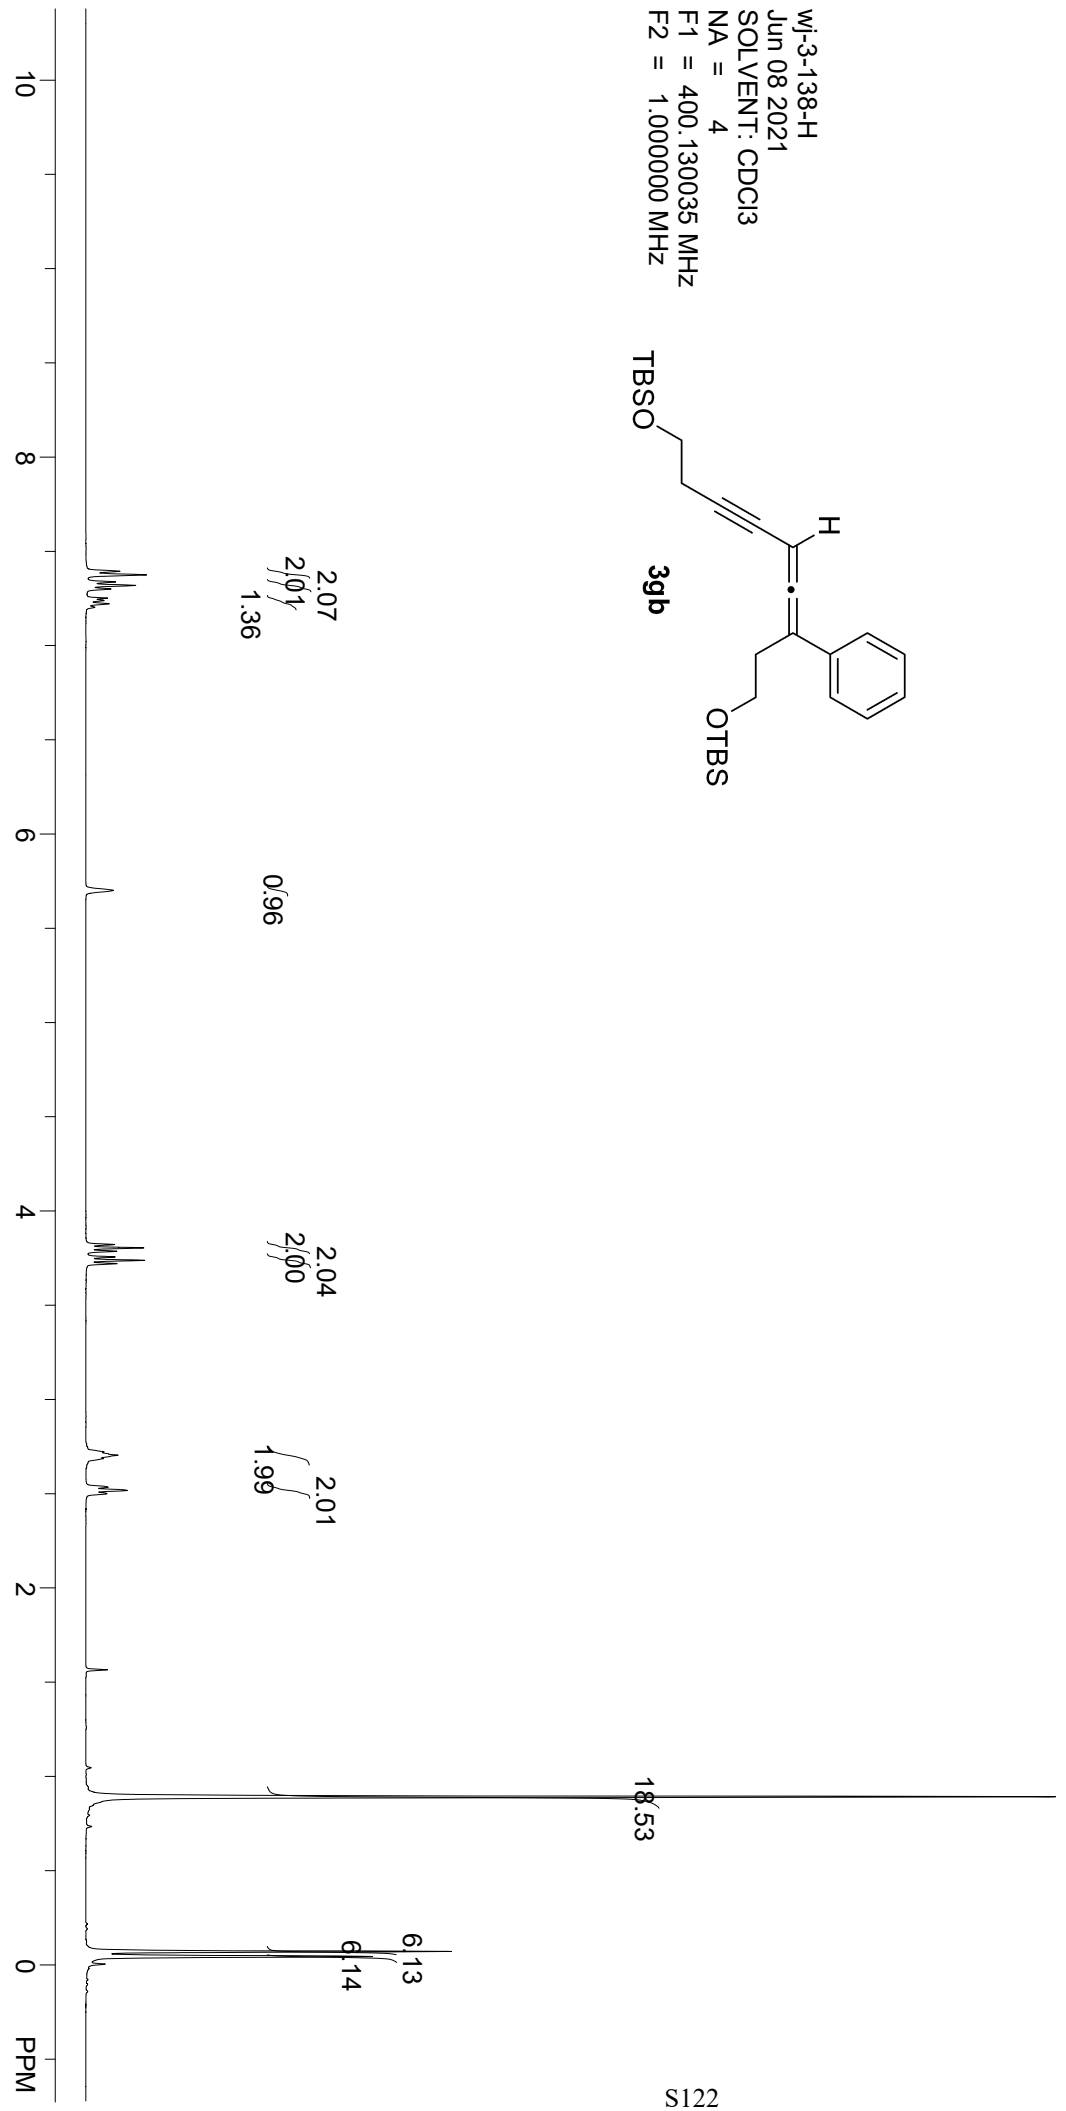

wj-3-138-C  
Jun 08 2021  
SOLVENT: CDCl3  
NA = 300  
F1 = 100.612770 MHz  
F2 = 1.000000 MHz

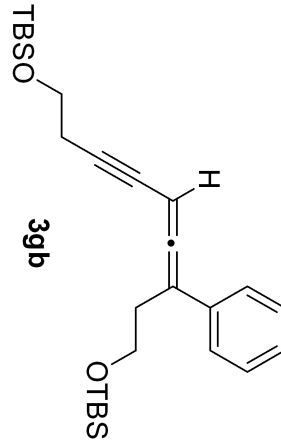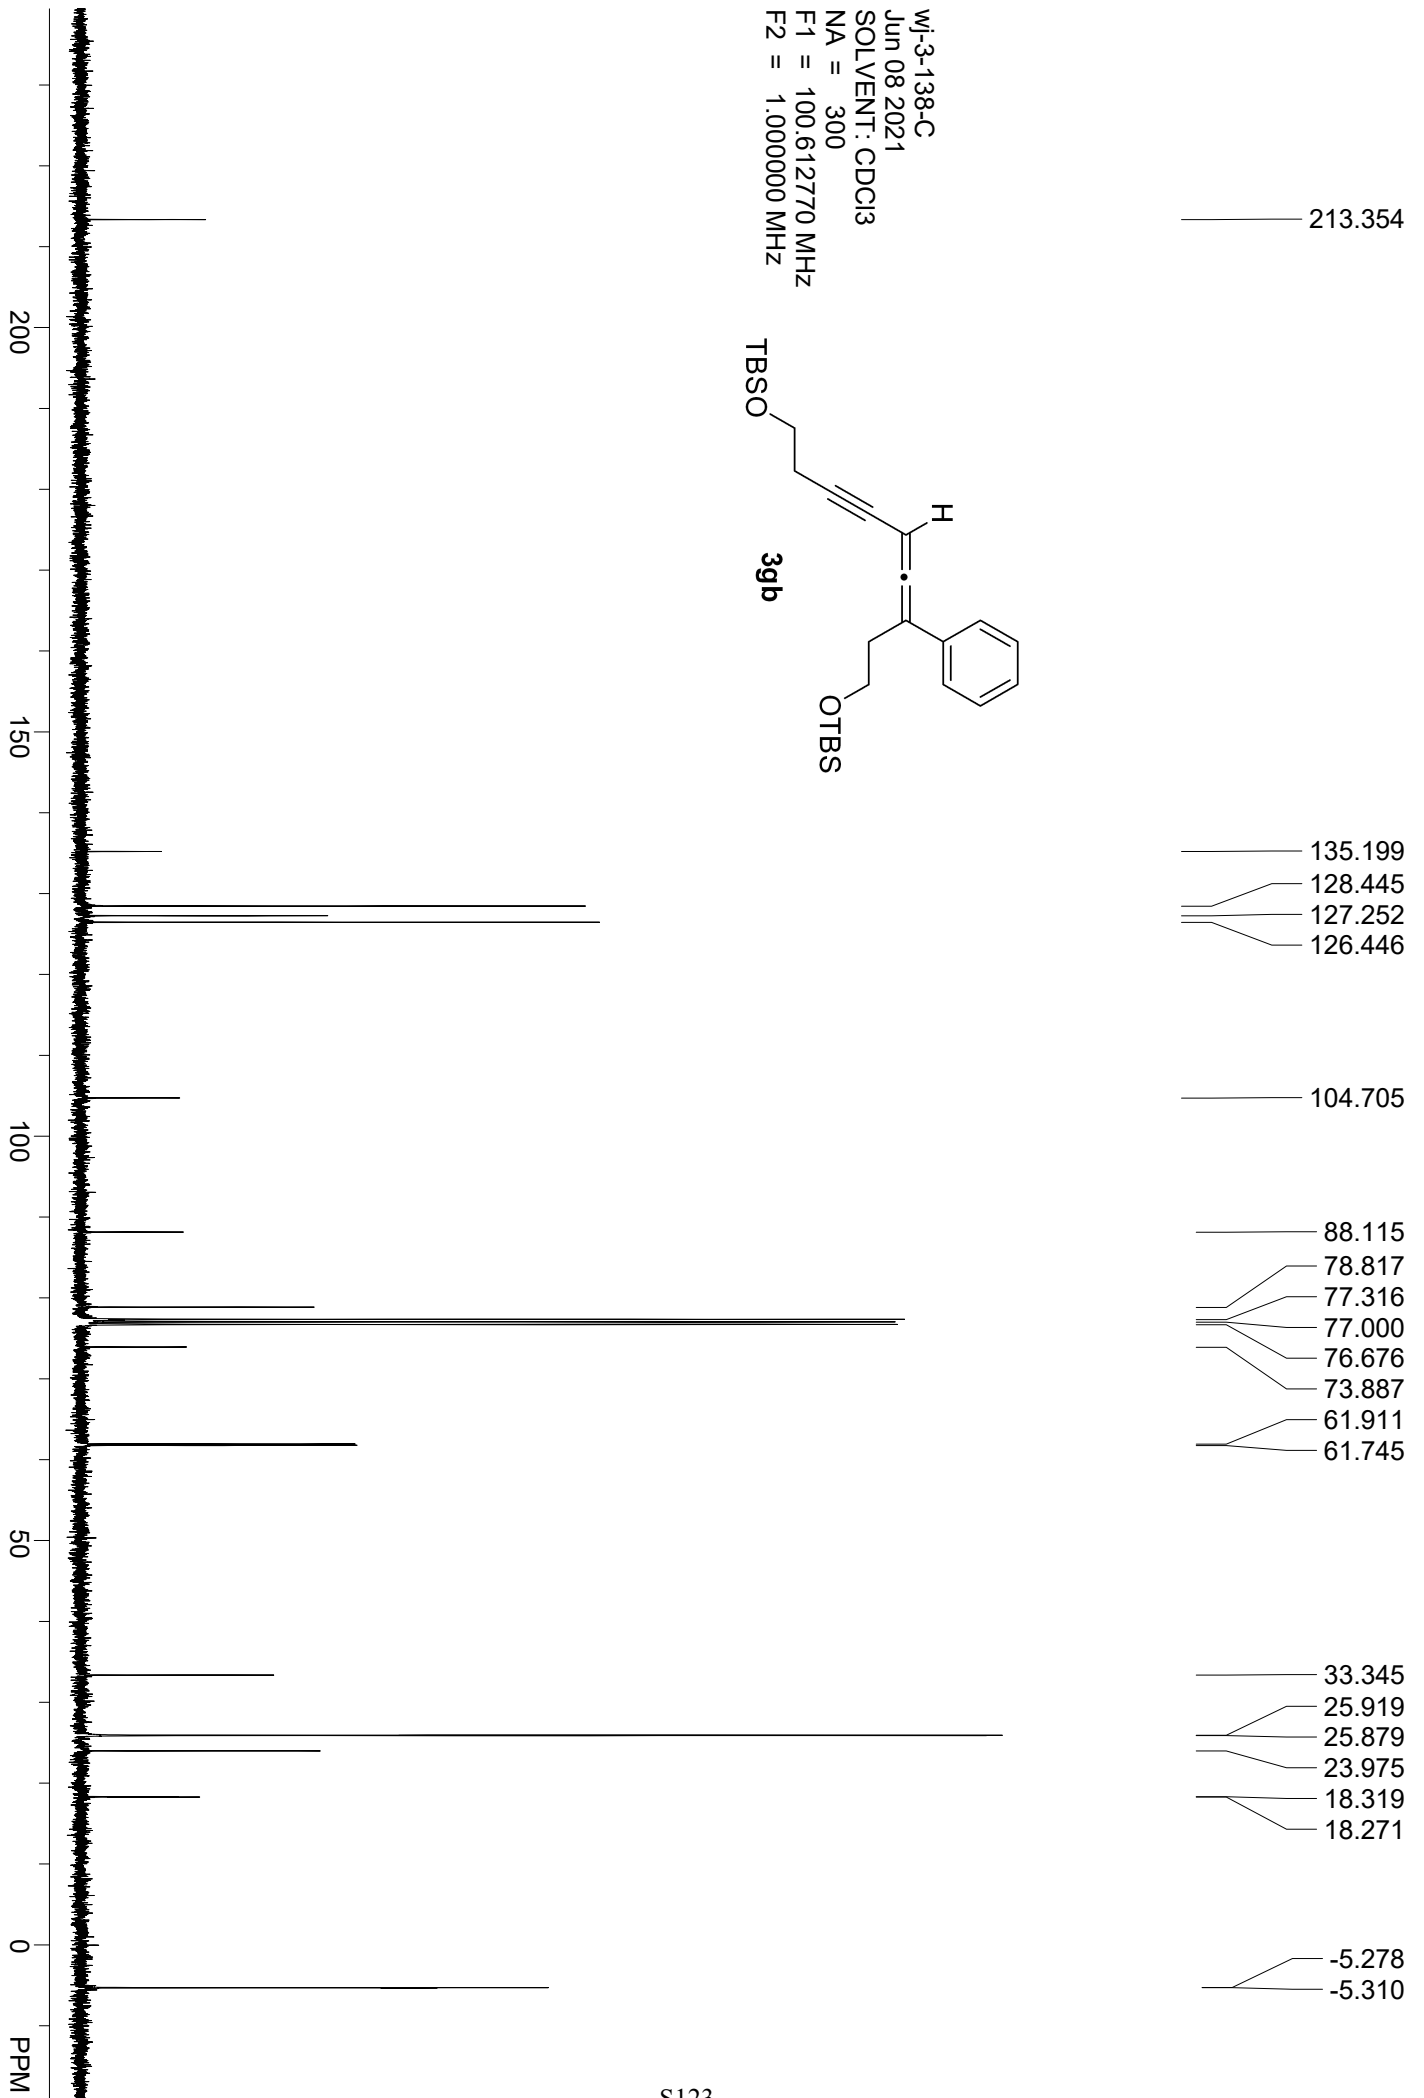

wf-3-139-H  
Jun 09 2021  
SOLVENT: CDCl3  
NA = 4  
F1 = 400.130005 MHz  
F2 = 1.000000 MHz

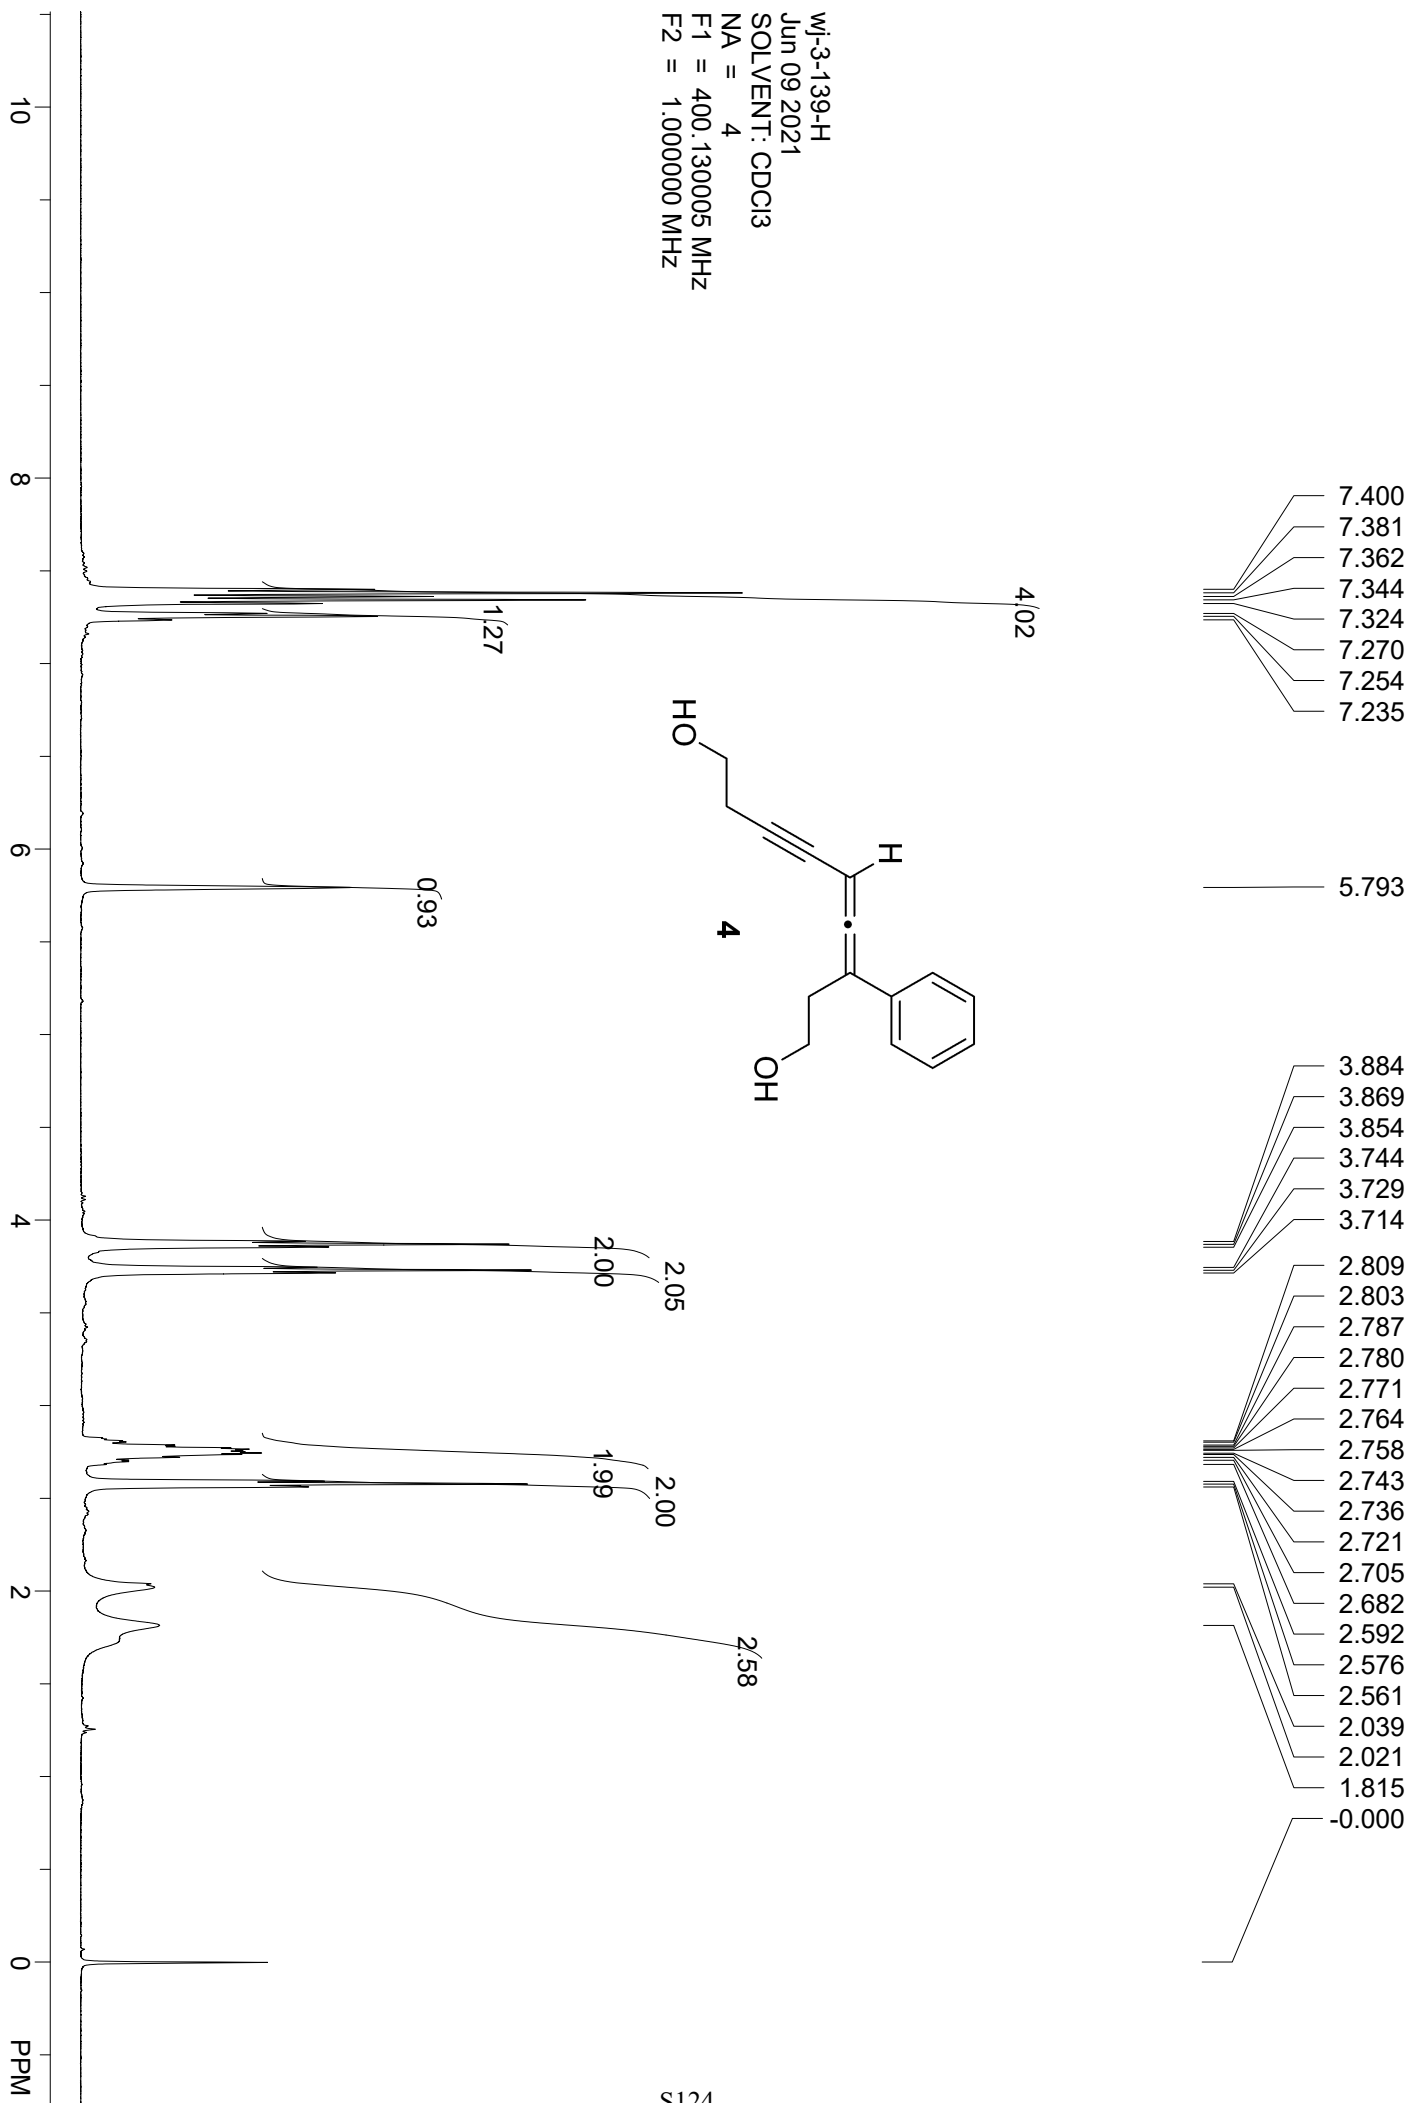



213.109

134.630  
128.611  
127.631  
126.399

104.934

88.226  
79.449  
77.324  
77.000  
76.684  
74.385  
60.987  
60.789

33.116

23.920

wf-3-139-C  
Jun 09 2021  
SOLVENT: CDCl3  
NA = 350  
F1 = 100.612770 MHz  
F2 = 1.000000 MHz

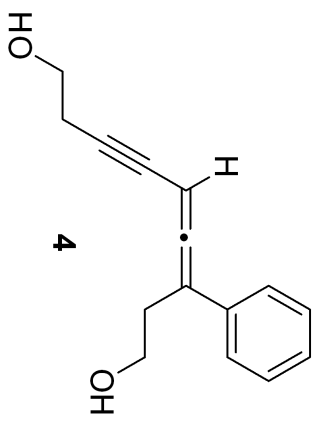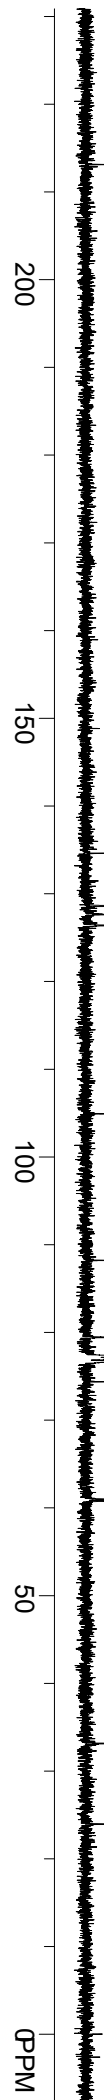

WJ-3-157-H  
Jun 17 2021  
SOLVENT: CDCl3  
NA = 4  
F1 = 400.130005 MHz  
F2 = 1.000000 MHz

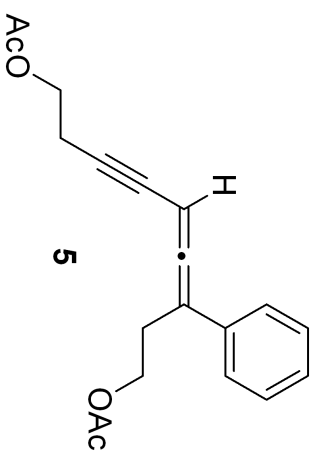

7.392  
7.373  
7.362  
7.344  
7.325  
7.264  
7.251  
7.234

5.763

4.298  
4.285  
4.268  
4.188  
4.171  
4.154

2.867  
2.845  
2.821  
2.804  
2.786  
2.759  
2.661  
2.646  
2.629  
2.066  
2.057

0.000

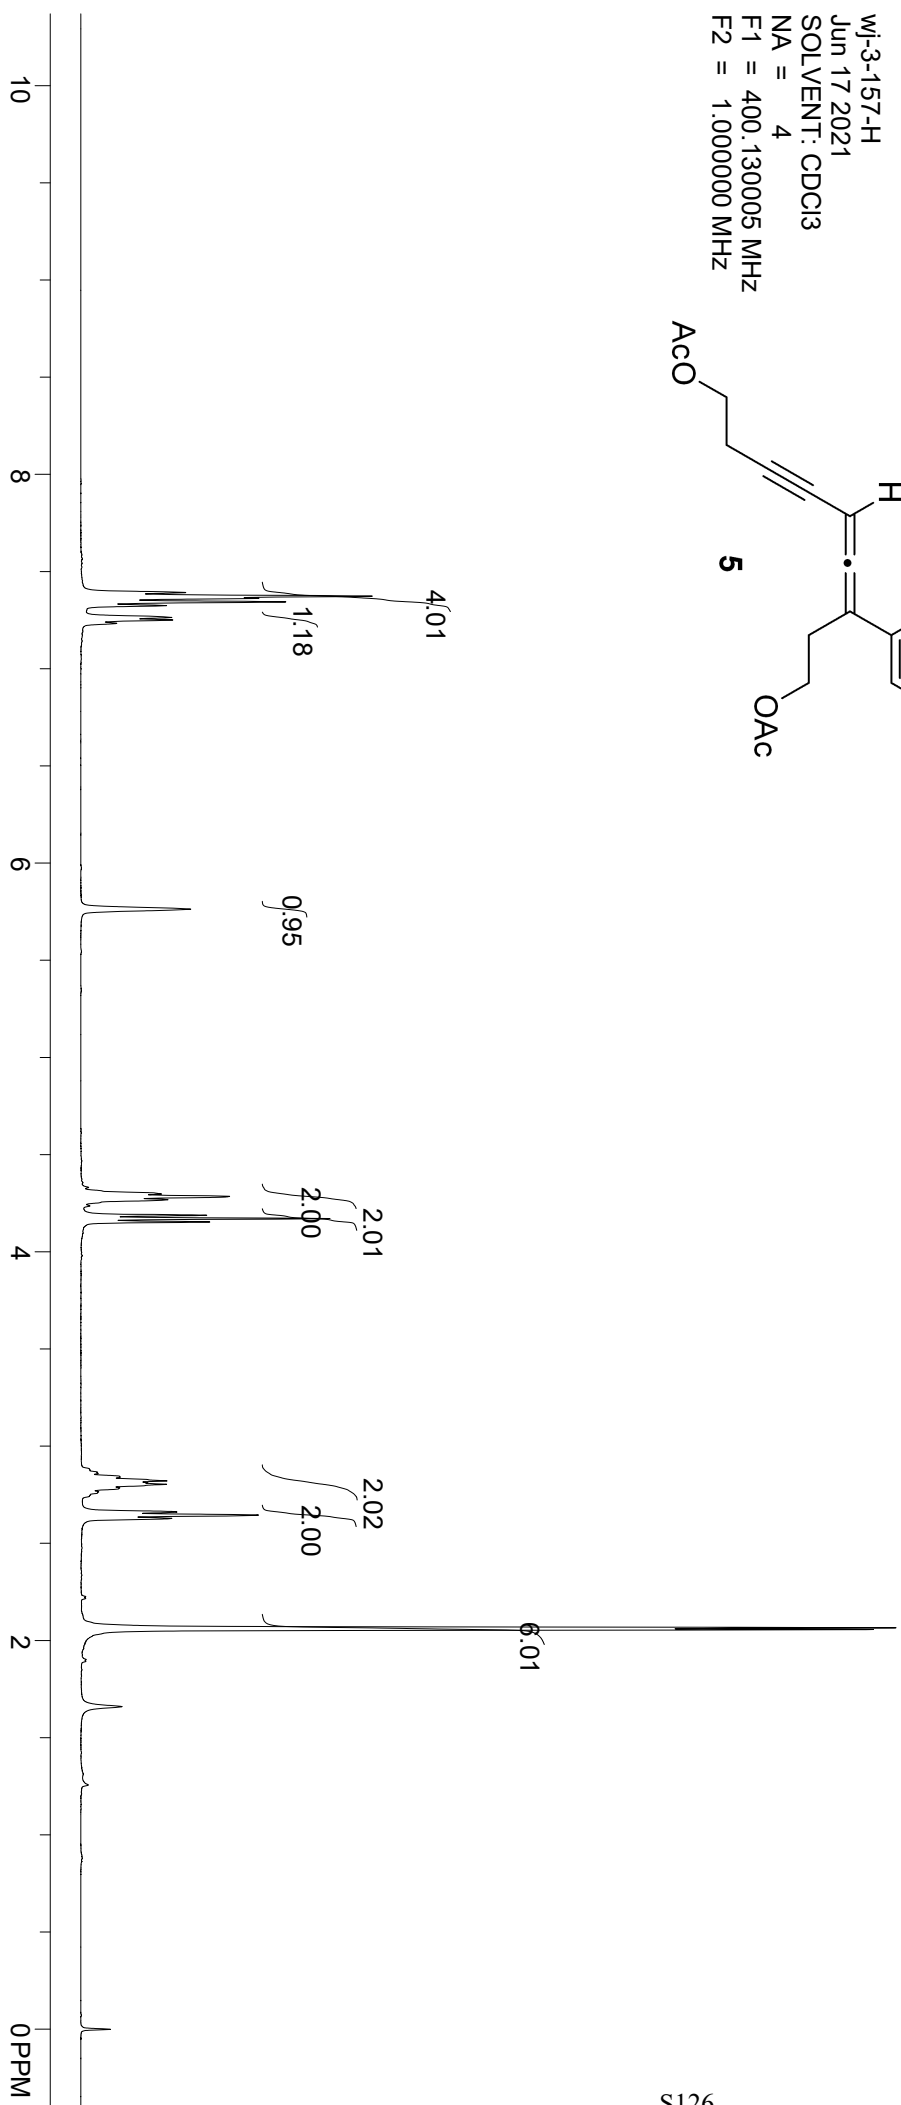

WJ-3-157-C  
Jun 17 2021  
SOLVENT: CDCl3  
NA = 500  
F1 = 100.612770 MHz  
F2 = 1.000000 MHz

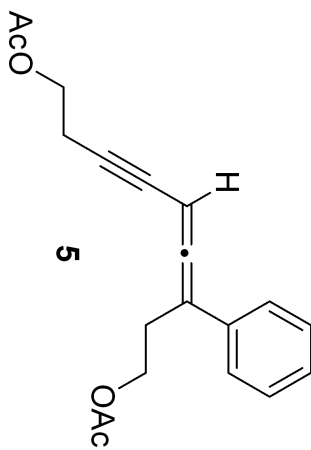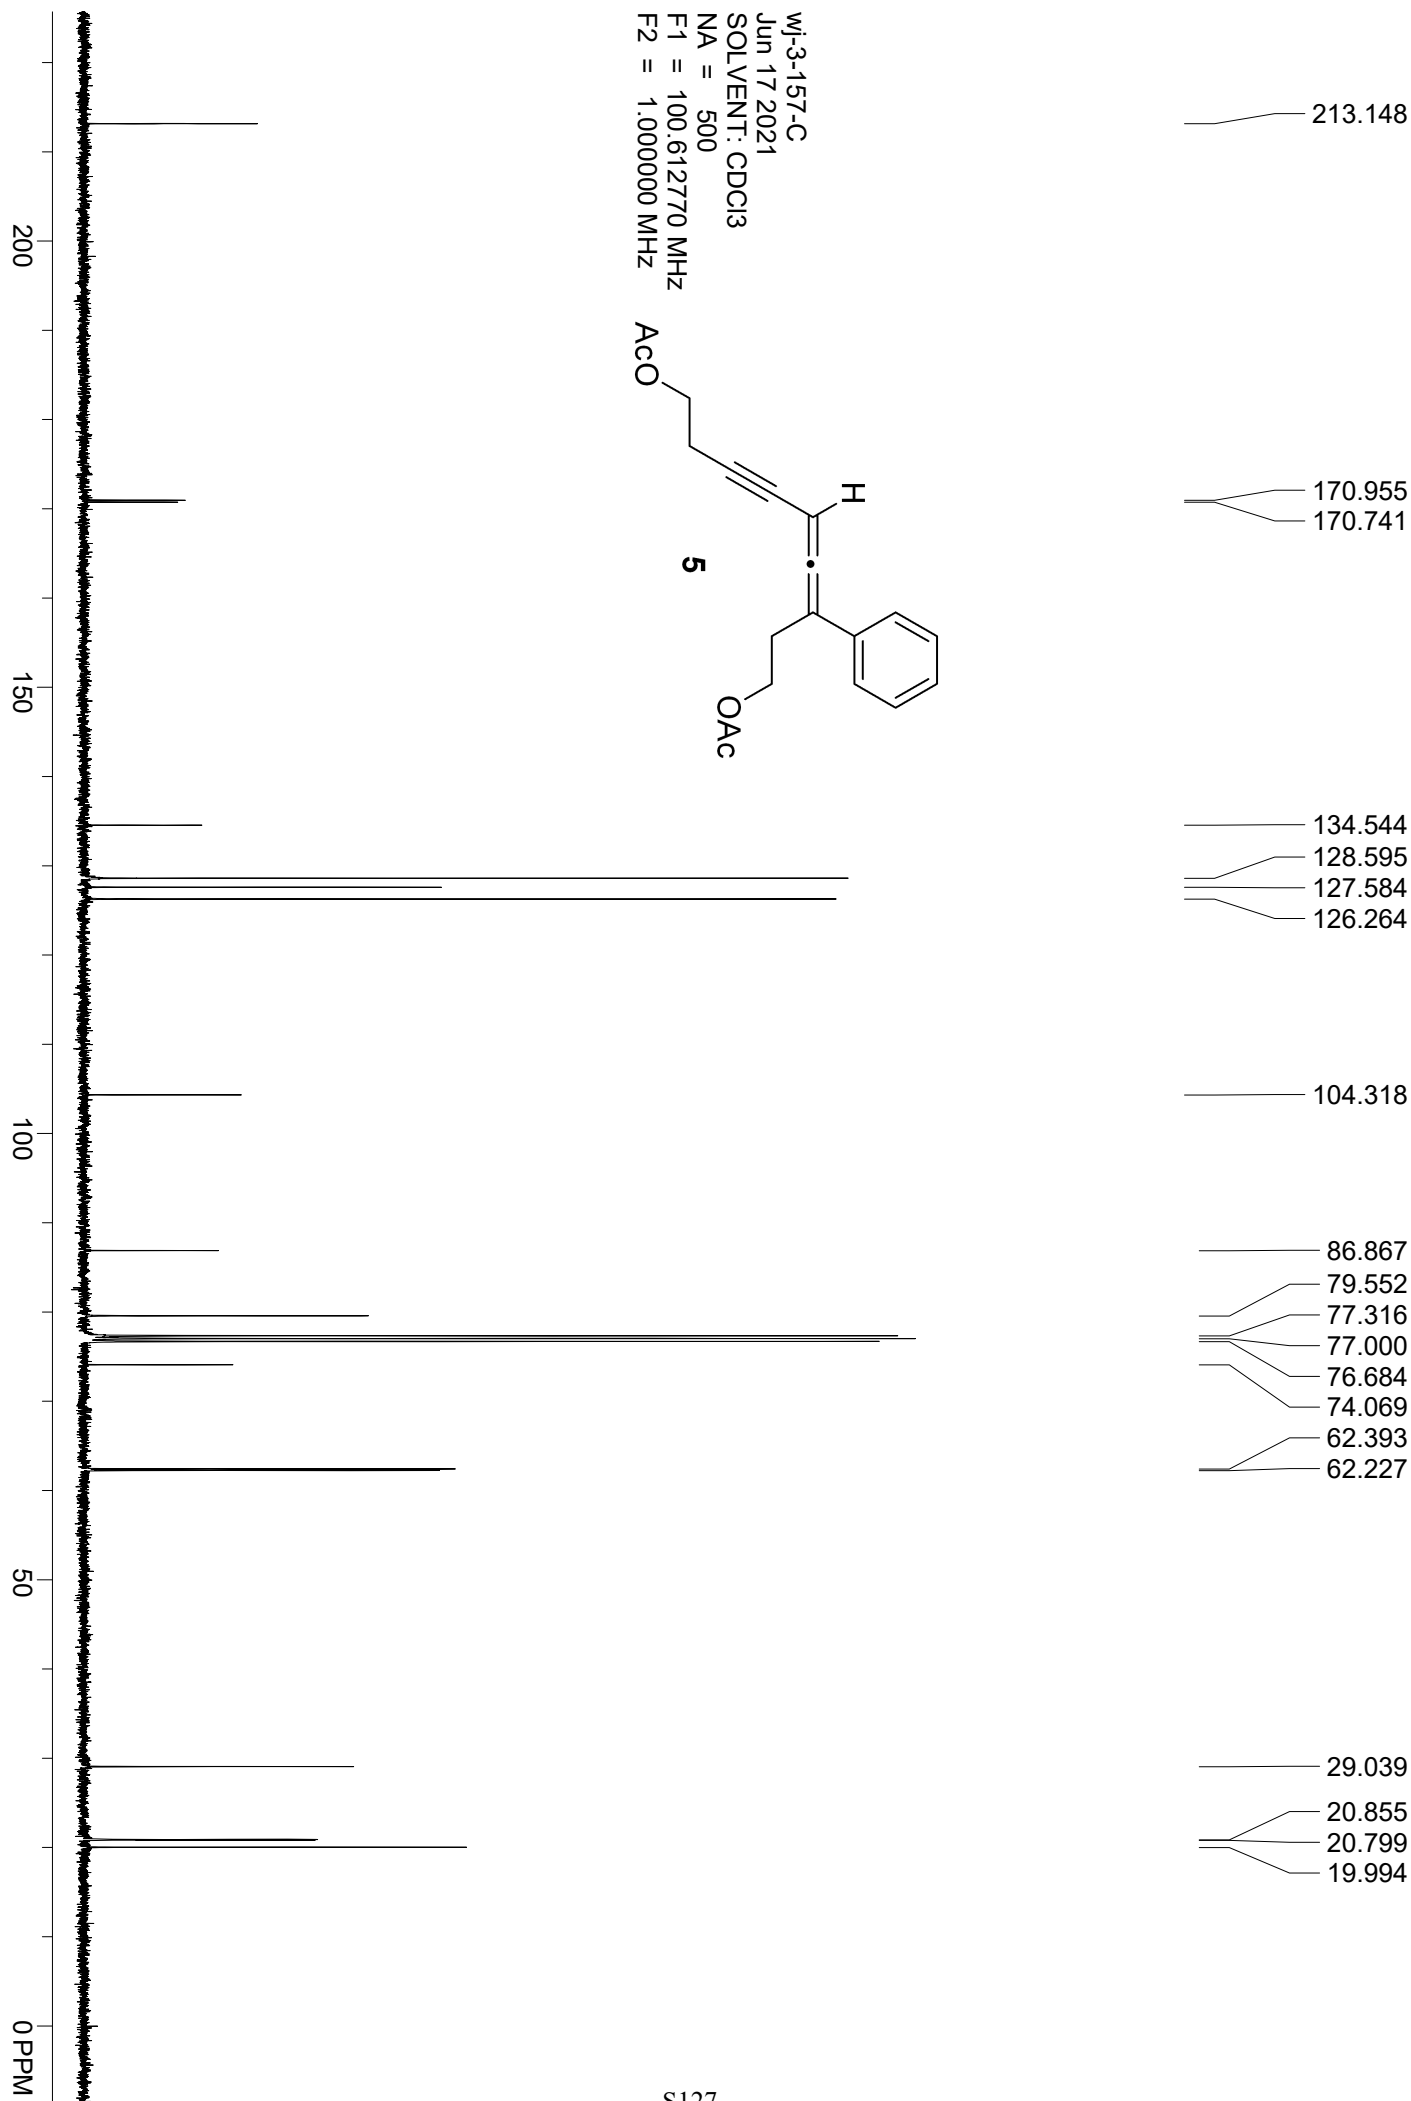

wj-4-017-H  
 Jul 19 2021  
 SOLVENT: CDCl3  
 NA = 4  
 F1 = 400.130035 MHz  
 F2 = 1.000000 MHz

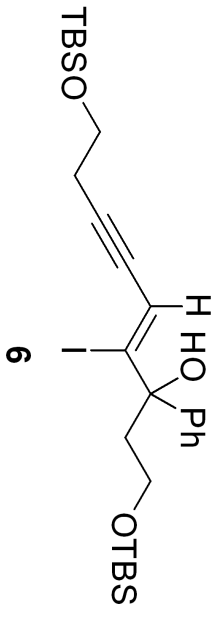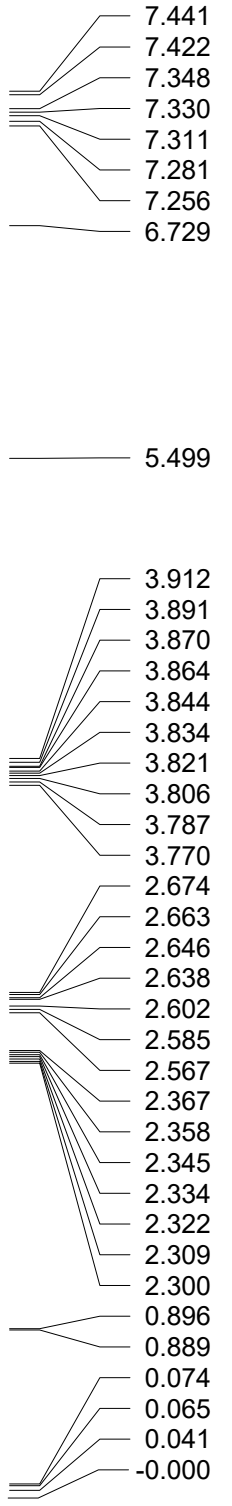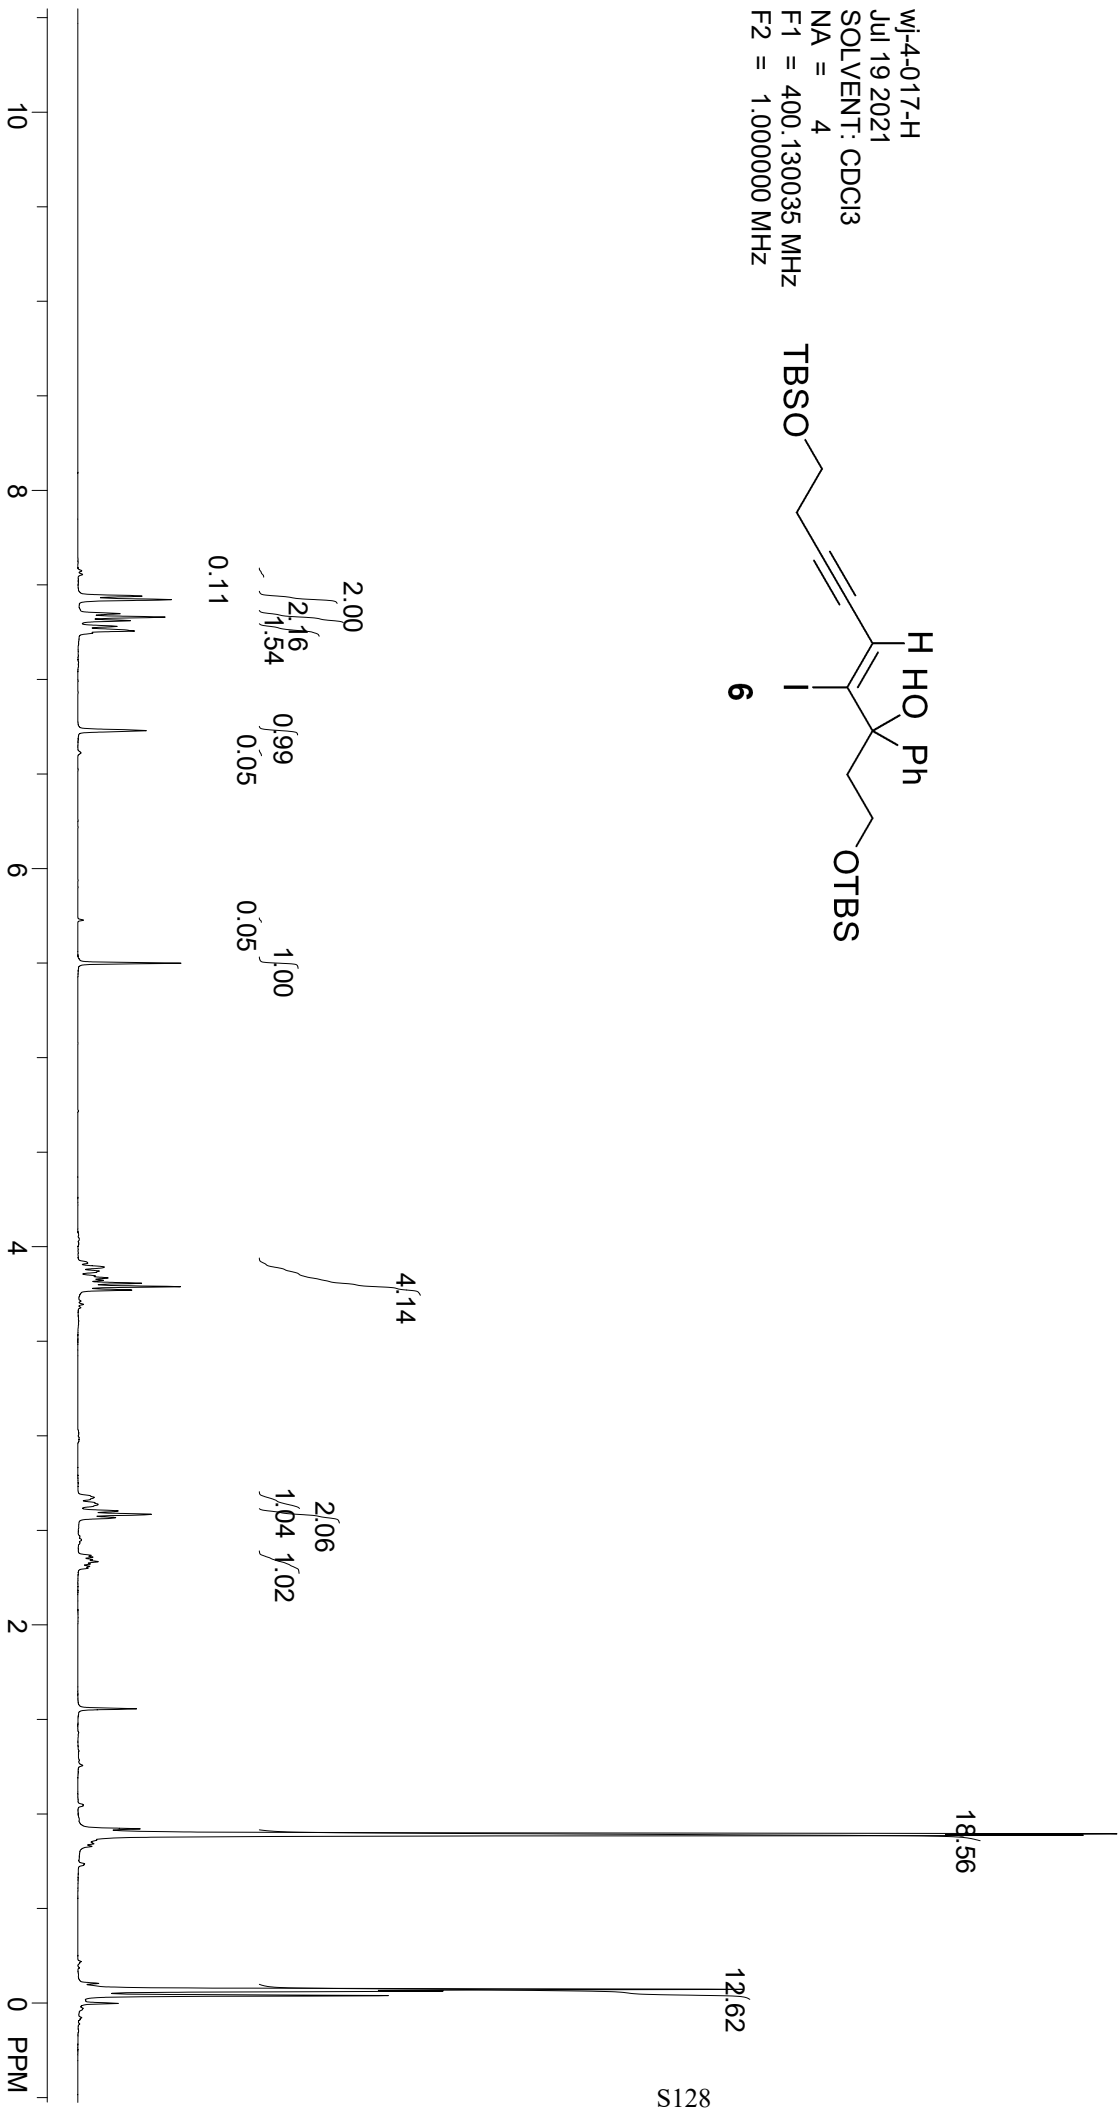

WJ-4-017-C  
Jul 19 2021  
SOLVENT: CDCl3  
NA = 350  
F1 = 100.612770 MHz  
F2 = 1.000000 MHz

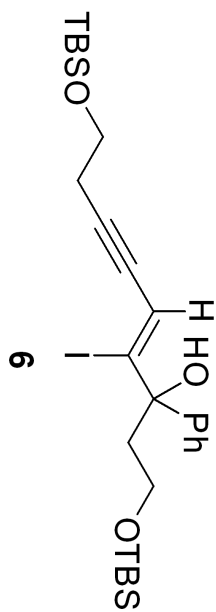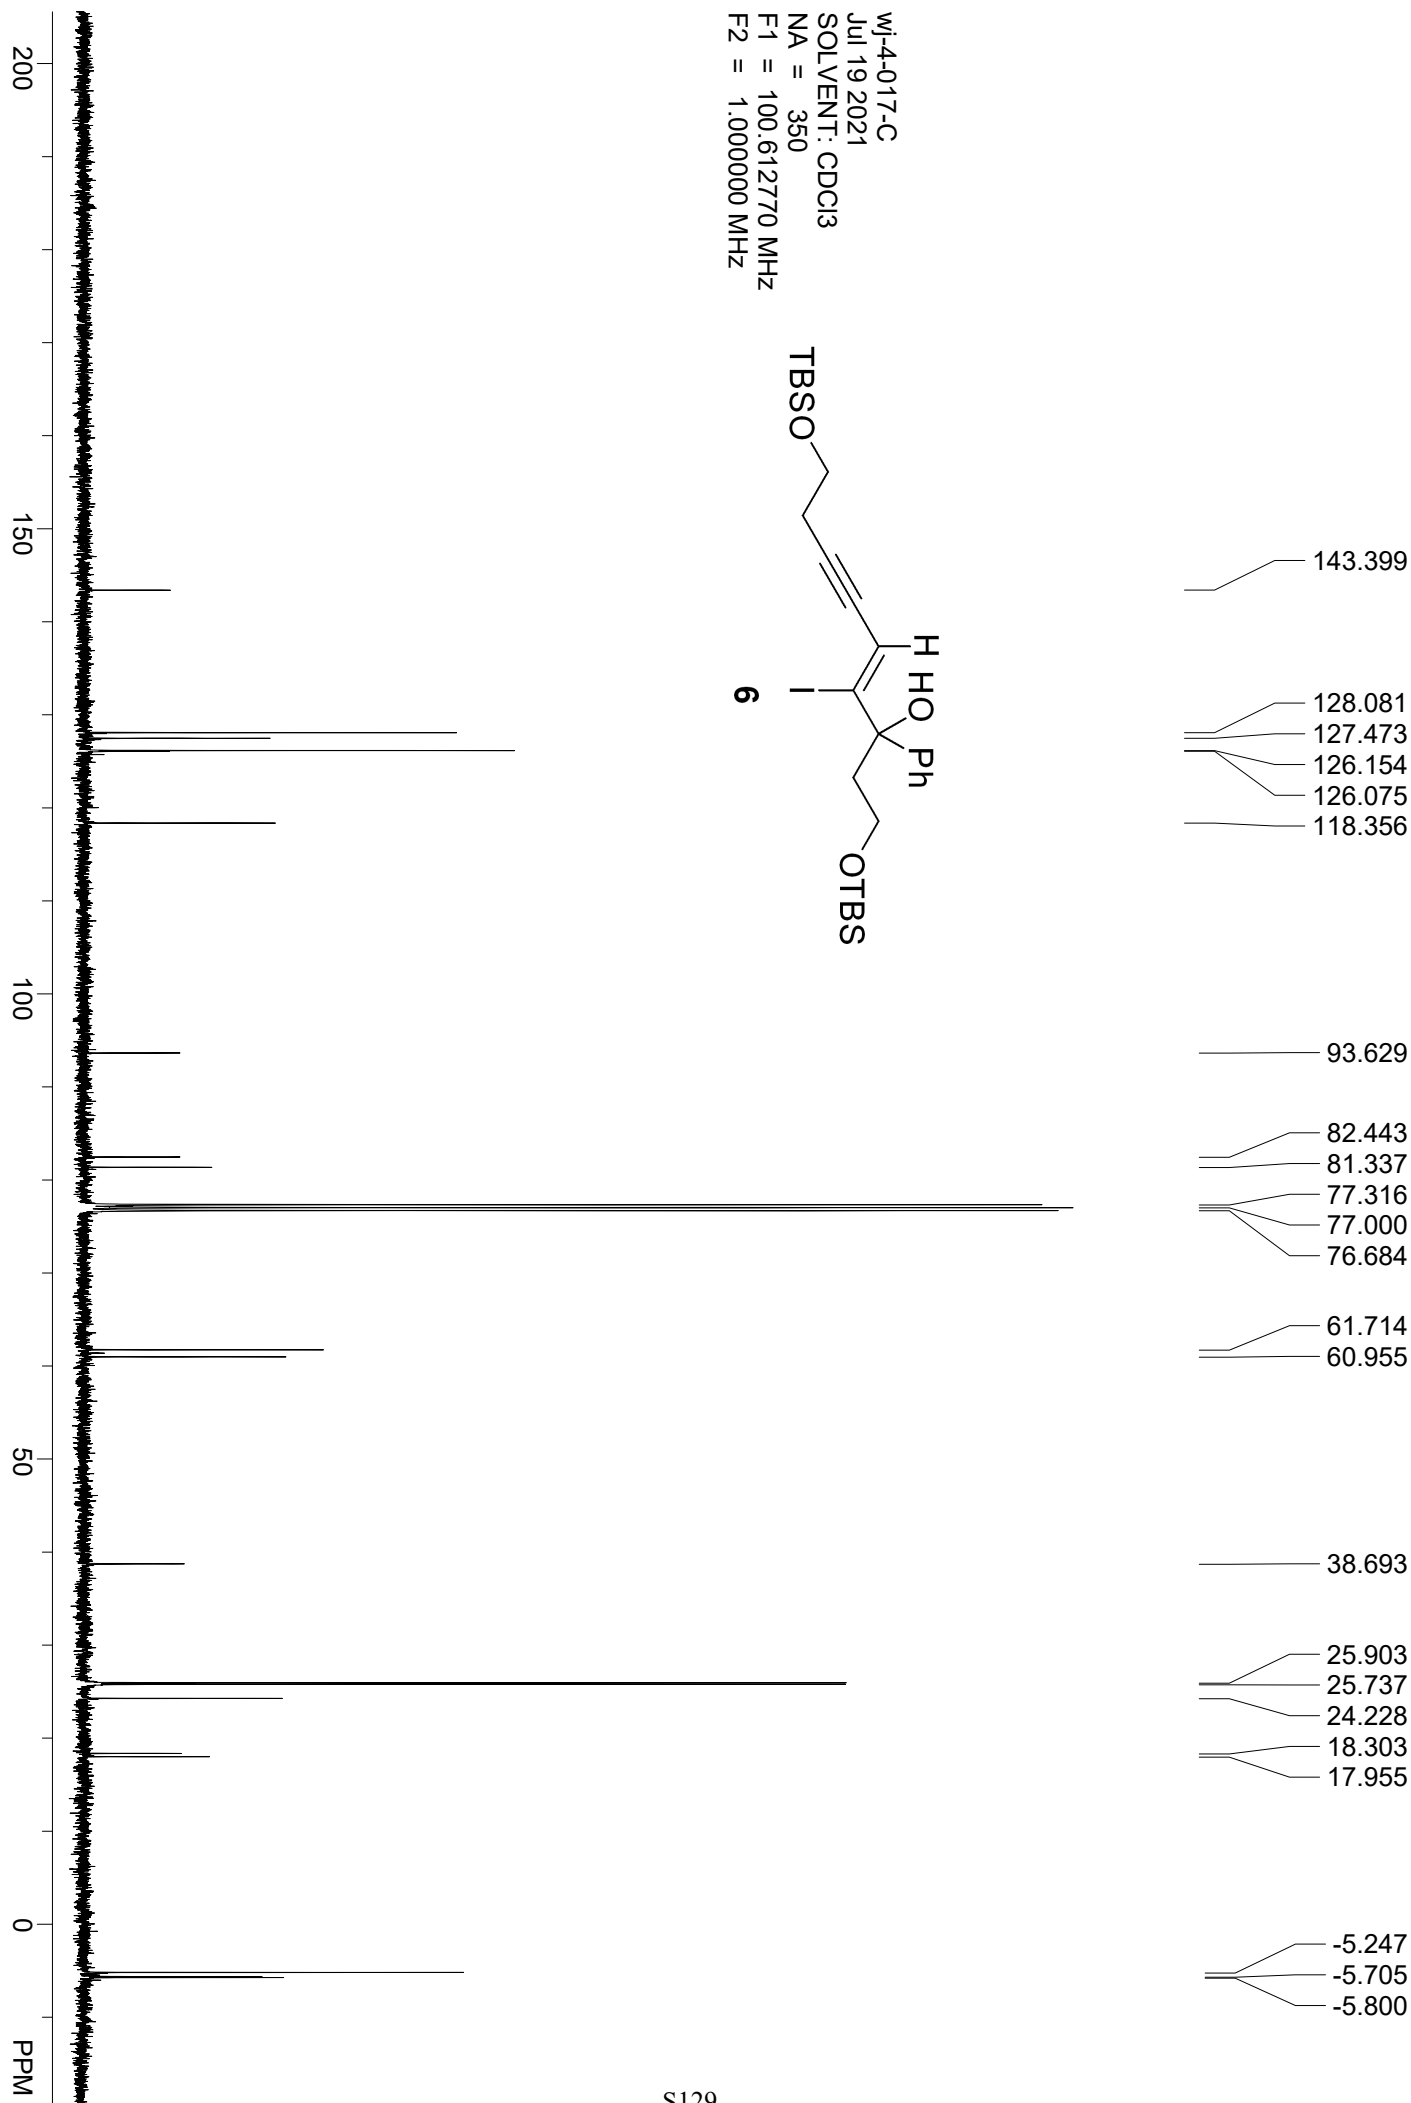

wj-7-142-H  
 Feb 16 2023  
 SOLVENT: CDCl3  
 NA = 4  
 F1 = 400.130005 MHz  
 F2 = 1.000000 MHz

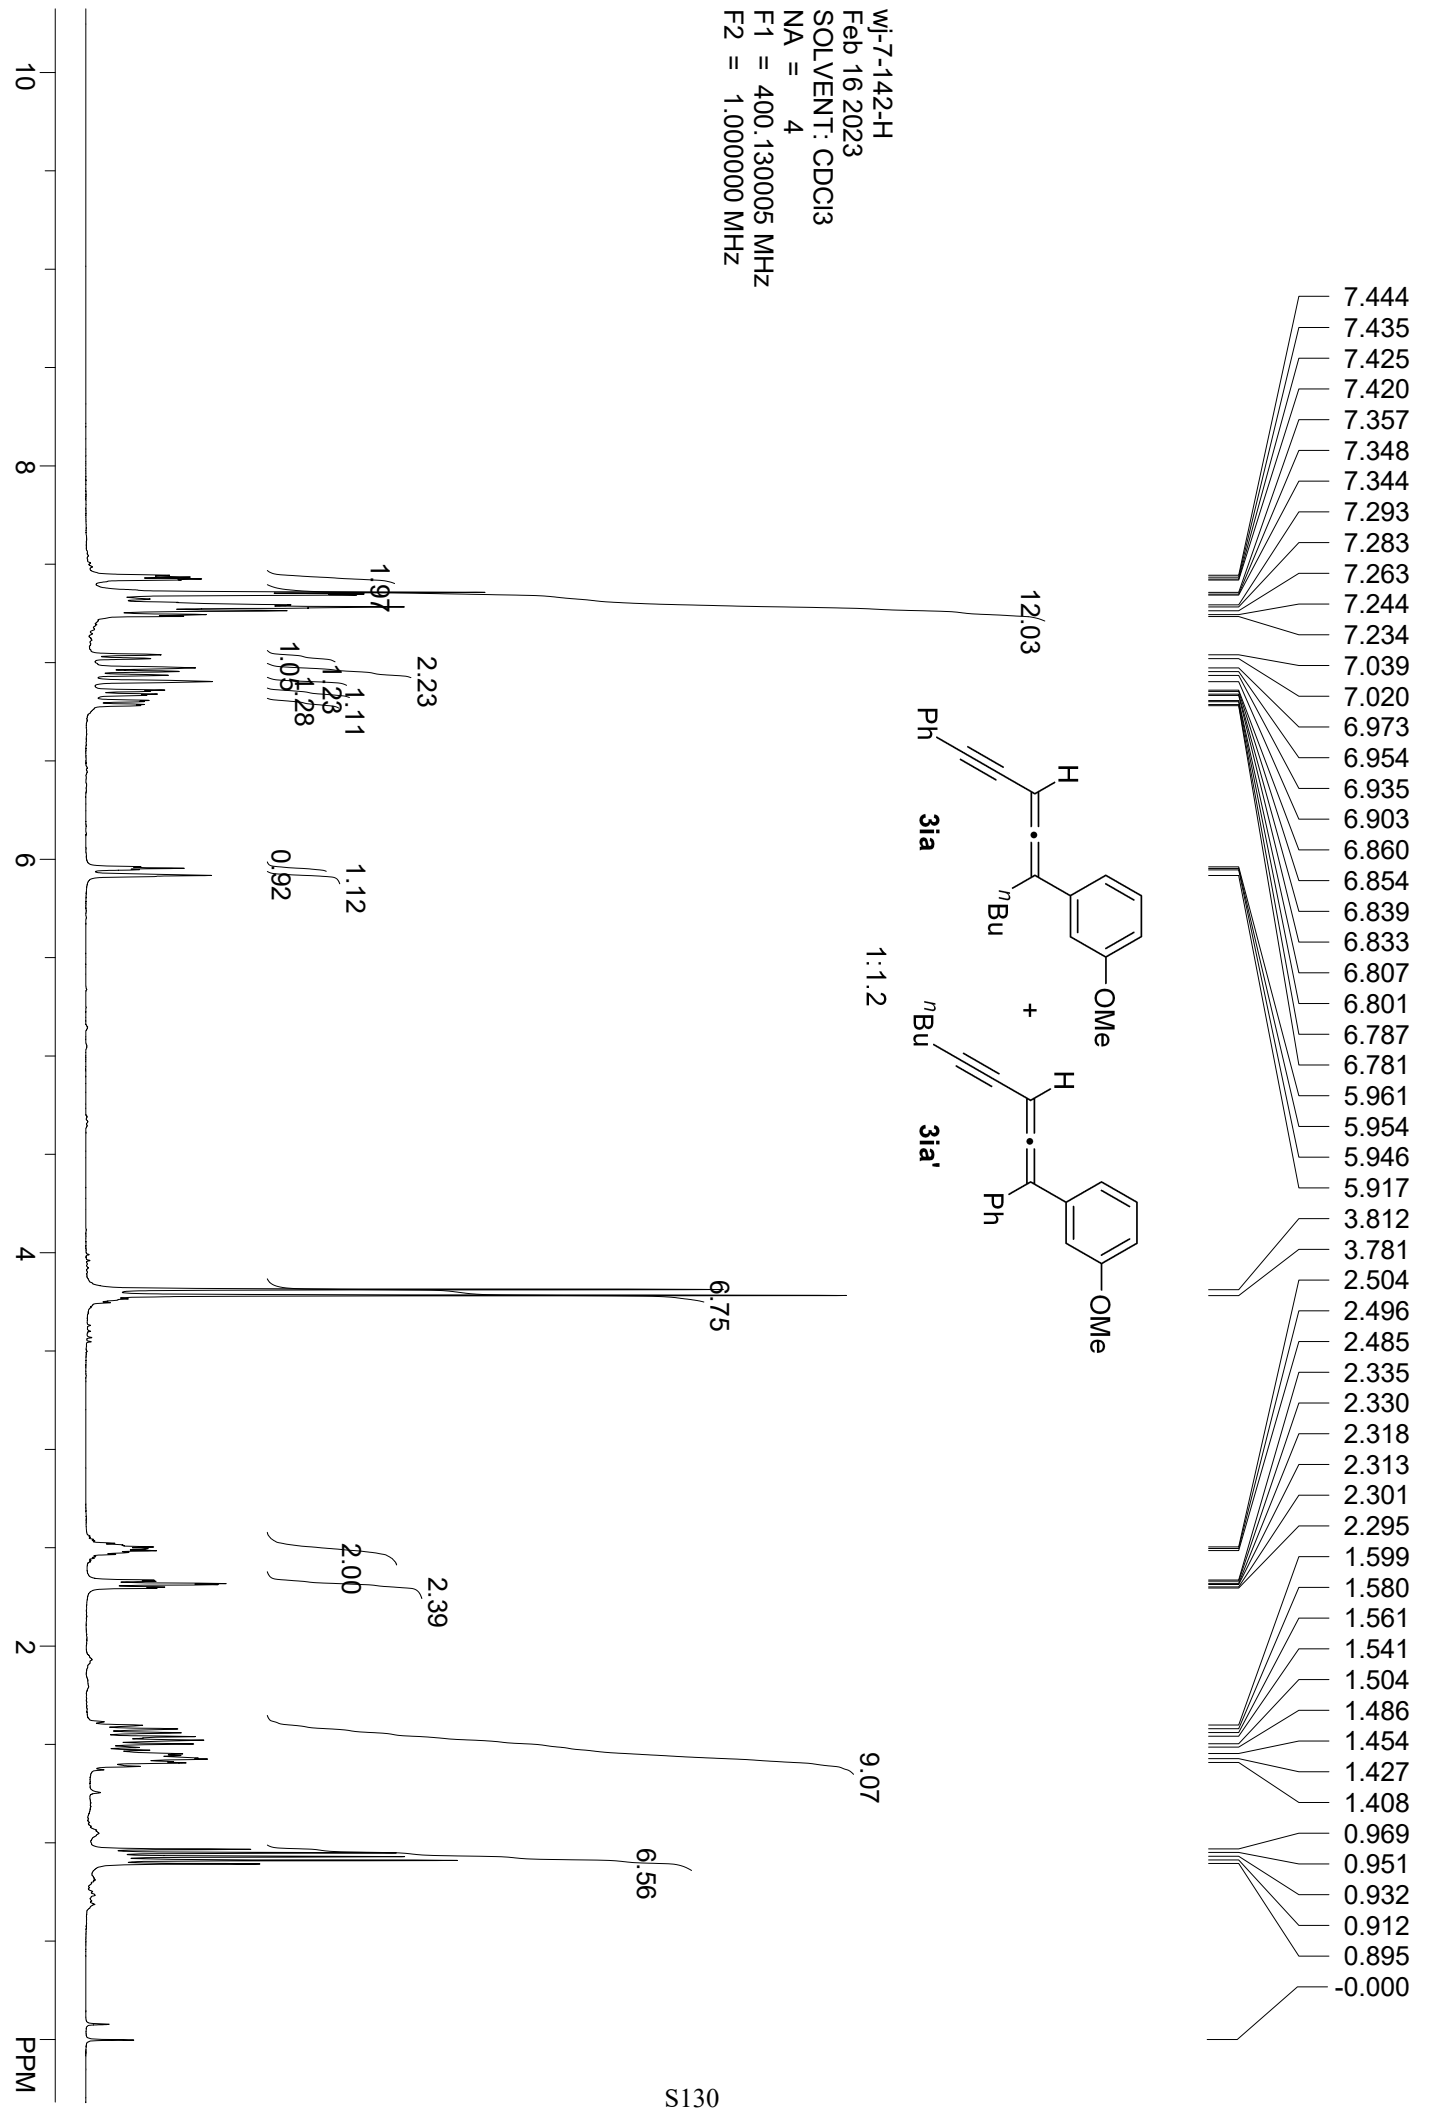

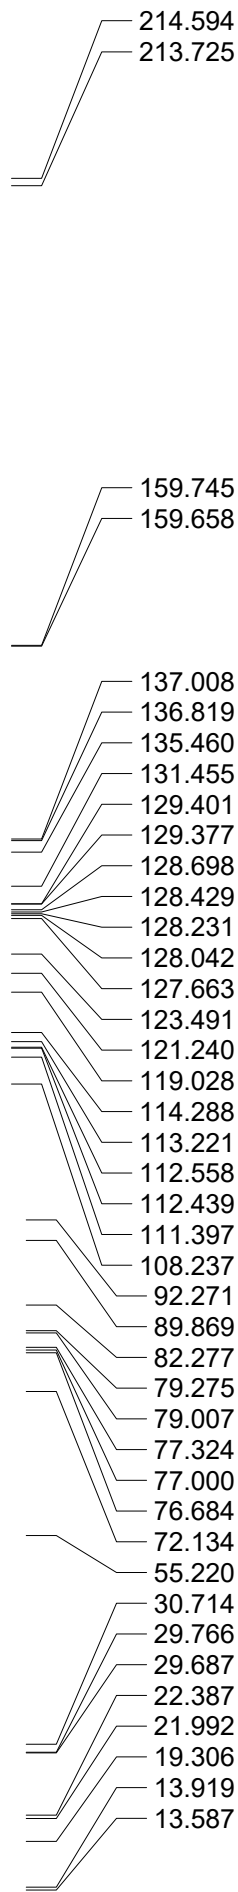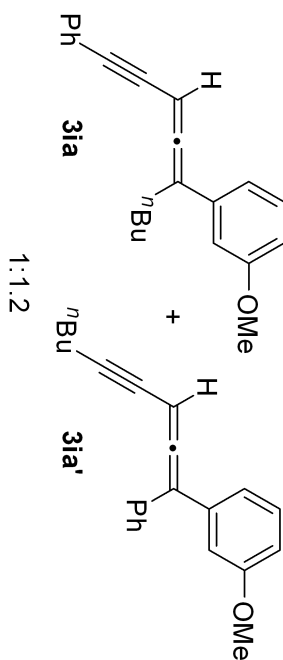

WJ-7-142-C  
 Feb 16 2023  
 SOLVENT: CDCl3  
 NA = 350  
 F1 = 100.612770 MHz  
 F2 = 1.000000 MHz

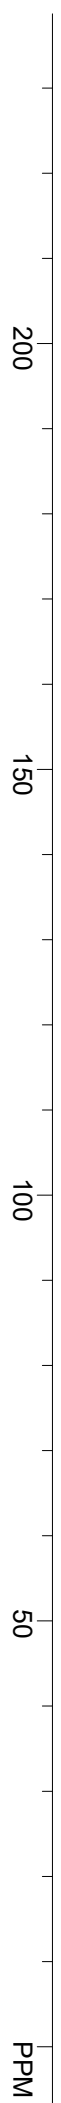

Supplement: d3qo01648j1.pdf [file d3qo01648j1.pdf]
